# Supplementary material
Source: publisher figshare collection journal article supplement (https://springernature.figshare.com/ndownloader/files/12302246)
Supplement: Supplementary file 1 [file 12302246]

## Sheet: Data descriptor morpho...
			Condition					Parameters							Not Considered
	Marker	Readout Position	Treatment	Cell Line	Filename	Feret Diameter	Aspect Ratio (AR)	Area	Major	Minor	Angle	Circ.	IntDen	%Area	RawIntDen	FeretX	FeretY	FeretAngle	MinFeret	Round	Solidity
	Lysotracker	Distal	Mock	Ctrl	Ctrl D1 Lyso Mock.tif Lyso.csv	1.14063	1.91485	0.46837	1.0686	0.55806	135	0.88357	119.434	100	2295	6.84375	20.7594	126.87	0.64524	0.52223	0.78261
	Lysotracker	Distal	Mock	Ctrl	Ctrl D1 Lyso Mock.tif Lyso.csv	1.8392	1.17464	1.71735	1.60264	1.36437	82.3724	0.94298	437.925	100	8415	9.125	25.7781	97.125	1.36875	0.85133	0.85714
	Lysotracker	Distal	Mock	Ctrl	Ctrl D1 Lyso Mock.tif Lyso.csv	1.88117	1.13073	1.87348	1.64232	1.45245	4.98347	0.85737	477.737	100	9180	50.4156	27.6031	165.964	1.59688	0.88439	0.82759
	Lysotracker	Distal	Mock	Ctrl	Ctrl D1 Lyso Mock.tif Lyso.csv	1.46071	1.28733	0.93674	1.23911	0.96254	140.062	0.80835	238.868	100	4590	6.3875	26.9187	128.66	1.12257	0.7768	0.83721
	Lysotracker	Distal	Mock	Ctrl	Ctrl D1 Lyso Mock.tif Lyso.csv	1.8392	1.11943	1.35307	1.38872	1.24055	124.684	0.74296	345.032	100	6630	58.6281	26.9187	119.745	1.36875	0.89331	0.76471
	Lysotracker	Distal	Mock	Ctrl	Ctrl D1 Lyso Mock.tif Lyso.csv	1.14063	1.37205	0.57245	1.00002	0.72885	15.0707	1	145.975	100	2805	81.2125	28.0594	36.8699	0.68438	0.72883	0.95652
	Lysotracker	Distal	Mock	Ctrl	Ctrl D1 Lyso Mock.tif Lyso.csv	1.33019	1.17153	0.93674	1.18206	1.00899	29.9493	0.96454	238.868	100	4590	114.519	28.2875	30.9638	1.14063	0.85359	0.83721
	Lysotracker	Distal	Mock	Ctrl	Ctrl D1 Lyso Mock.tif Lyso.csv	0.82252	1.58114	0.20816	0.64736	0.40942	135	0.69813	53.0819	100	1020	10.0375	27.6031	123.69	0.61247	0.63246	0.61538
	Lysotracker	Distal	Mock	Ctrl	Ctrl D1 Lyso Mock.tif Lyso.csv	1.66078	1.44541	1.09286	1.41818	0.98117	178.748	0.52665	278.68	100	5355	43.5719	28.2875	164.055	1.14063	0.69185	0.72414
	Lysotracker	Distal	Mock	Ctrl	Ctrl D1 Lyso Mock.tif Lyso.csv	1.29047	1.29057	0.67653	1.05437	0.81697	67.0965	0.95616	172.516	100	3315	52.6969	28.7437	45	0.9125	0.77485	0.89655
	Lysotracker	Distal	Mock	Ctrl	Ctrl D1 Lyso Mock.tif Lyso.csv	1.53031	1.17386	1.19694	1.33752	1.13942	167.344	1	305.221	100	5865	54.5219	28.2875	153.435	1.14063	0.85189	0.88462
	Lysotracker	Distal	Mock	Ctrl	Ctrl D1 Lyso Mock.tif Lyso.csv	0.96785	1.59636	0.36429	0.86048	0.53903	45.0001	1	92.8932	100	1785	37.8688	28.7437	45	0.64524	0.62642	0.875
	Lysotracker	Distal	Mock	Ctrl	Ctrl D1 Lyso Mock.tif Lyso.csv	0.82252	1.49607	0.26021	0.70403	0.47058	145.901	0.87266	66.3523	100	1275	42.2031	28.0594	123.69	0.61247	0.66842	0.71429
	Lysotracker	Distal	Mock	Ctrl	Ctrl D1 Lyso Mock.tif Lyso.csv	3.42947	1.23724	5.41227	2.91993	2.36003	159.836	0.56291	1380.13	100	26520	64.1031	29.6562	176.186	2.59618	0.80825	0.8062
	Lysotracker	Distal	Mock	Ctrl	Ctrl D1 Lyso Mock.tif Lyso.csv	0.64524	1.46385	0.15612	0.53943	0.3685	135	1	39.8114	100	765	88.5125	28.5156	135	0.45625	0.68313	0.85714
	Lysotracker	Distal	Mock	Ctrl	Ctrl D1 Lyso Mock.tif Lyso.csv	1.88117	1.76894	1.30103	1.71181	0.9677	90.738	0.84221	331.762	100	6375	0.45625	30.5688	75.9638	0.9125	0.56531	0.90909
	Lysotracker	Distal	Mock	Ctrl	Ctrl D1 Lyso Mock.tif Lyso.csv	2.32643	2.32669	1.61327	2.18614	0.93959	179.047	0.75414	411.384	100	7905	99.2344	28.9719	168.69	0.9125	0.42979	0.88571
	Lysotracker	Distal	Mock	Ctrl	Ctrl D1 Lyso Mock.tif Lyso.csv	1.02021	1.38403	0.52041	0.95764	0.69192	180	1	132.705	100	2550	106.534	28.9719	153.435	0.68438	0.72253	0.90909
	Lysotracker	Distal	Mock	Ctrl	Ctrl D1 Lyso Mock.tif Lyso.csv	0.64524	1	0.20816	0.51482	0.51482	0	1	53.0819	100	1020	92.3906	28.9719	135	0.45625	1	1
	Lysotracker	Distal	Mock	Ctrl	Ctrl D1 Lyso Mock.tif Lyso.csv	1.44279	1.49136	0.98878	1.37024	0.91878	5.58244	1	252.139	100	4845	115.431	29.6562	161.565	0.9125	0.67053	0.88372
	Lysotracker	Distal	Mock	Ctrl	Ctrl D1 Lyso Mock.tif Lyso.csv	0.72139	1.5667	0.15612	0.55806	0.3562	90	0.5236	39.8114	100	765	67.7531	29.8844	108.435	0.45625	0.63828	0.6
	Lysotracker	Distal	Mock	Ctrl	Ctrl D1 Lyso Mock.tif Lyso.csv	3.82407	2.78899	3.33063	3.43907	1.23309	172.987	0.41653	849.31	100	16320	76.1938	33.5344	162.646	1.70512	0.35855	0.66321
	Lysotracker	Distal	Mock	Ctrl	Ctrl D1 Lyso Mock.tif Lyso.csv	1.14063	1.93856	0.41633	1.01371	0.52292	144.645	0.91441	106.164	100	2040	92.3906	75.9656	143.13	0.64524	0.51585	0.84211
	Lysotracker	Distal	Mock	Ctrl	Ctrl D1 Lyso Mock.tif Lyso.csv	1.9491	1.23246	1.92552	1.73826	1.4104	117.303	0.92791	491.007	100	9435	63.6469	80.7563	110.556	1.59688	0.81139	0.87059
	Lysotracker	Distal	Mock	Ctrl	Ctrl D1 Lyso Mock.tif Lyso.csv	1.64503	1.14397	1.50919	1.48264	1.29604	20.5733	0.89825	384.843	100	7395	74.3688	81.4406	146.31	1.36875	0.87415	0.87879
	Lysotracker	Distal	Mock	Ctrl	Ctrl D1 Lyso Mock.tif Lyso.csv	1.02021	1.34027	0.46837	0.89402	0.66704	20.3007	1	119.434	100	2295	4.33438	83.4938	26.565	0.68438	0.74612	0.85714
	Lysotracker	Distal	Mock	Ctrl	Ctrl D1 Lyso Mock.tif Lyso.csv	1.14063	1.21815	0.62449	0.98417	0.80792	145.278	0.96737	159.246	100	3060	80.0719	83.0375	126.87	0.9125	0.82091	0.88889
	Lysotracker	Distal	Mock	Ctrl	Ctrl D1 Lyso Mock.tif Lyso.csv	1.22849	1.18367	0.72857	1.04787	0.88527	176.437	0.99252	185.786	100	3570	89.8813	84.1781	21.8014	0.9125	0.84483	0.82353
	Lysotracker	Distal	Mock	Ctrl	Ctrl D1 Lyso Mock.tif Lyso.csv	1.44279	1.46515	0.83266	1.24632	0.85064	1.65889	0.92693	212.327	100	4080	83.4938	84.4063	161.565	0.9125	0.68252	0.82051
	Lysotracker	Distal	Mock	Ctrl	Ctrl D1 Lyso Mock.tif Lyso.csv	1.22849	2.56398	0.41633	1.16582	0.45469	171.323	0.8202	106.164	100	2040	31.4812	84.4063	158.199	0.45625	0.39002	0.88889
	Lysotracker	Distal	Mock	Ctrl	Ctrl D1 Lyso Mock.tif Lyso.csv	0.64524	1	0.20816	0.51482	0.51482	0	1	53.0819	100	1020	41.7469	85.775	135	0.45625	1	1
	Lysotracker	Distal	Mock	Ctrl	Ctrl D1 Lyso Mock.tif Lyso.csv	1.22849	1.12747	0.78062	1.05859	0.9389	14.0362	1	199.057	100	3825	5.70313	86.9156	21.8014	0.9125	0.88694	0.85714
	Lysotracker	Distal	Mock	Ctrl	Ctrl D1 Lyso Mock.tif Lyso.csv	0.72139	3	0.15612	0.77223	0.25741	0	0.96737	39.8114	100	765	18.7063	87.1438	161.565	0.22813	0.33333	1
	Lysotracker	Distal	Mock	Ctrl	Ctrl D1 Lyso Mock.tif Lyso.csv	0.82252	1.29099	0.31225	0.71642	0.55493	135	1	79.6228	100	1530	91.0219	87.6	123.69	0.64524	0.7746	0.8
	Lysotracker	Distal	Mock	Ctrl	Ctrl D1 Lyso Mock.tif Lyso.csv	1.02021	1.24108	0.52041	0.90683	0.73068	45.0002	0.98175	132.705	100	2550	104.938	88.2844	26.565	0.80654	0.80575	0.8
	Lysotracker	Distal	Mock	Ctrl	Ctrl D1 Lyso Mock.tif Lyso.csv	0.82252	1.22334	0.26021	0.63663	0.5204	0	0.76359	66.3523	100	1275	11.8625	88.9688	146.31	0.68438	0.81744	0.71429
	Lysotracker	Distal	Mock	Ctrl	Ctrl D2 Lyso Mock.tif Lyso.csv	0.64524	1	0.20816	0.51482	0.51482	0	1	53.0819	100	1020	77.5625	23.725	135	0.45625	1	1
	Lysotracker	Distal	Mock	Ctrl	Ctrl D2 Lyso Mock.tif Lyso.csv	1.14063	1.15921	0.67653	0.99926	0.86202	45	1	172.516	100	3315	13.2312	25.3219	36.8699	0.9125	0.86266	0.89655
	Lysotracker	Distal	Mock	Ctrl	Ctrl D2 Lyso Mock.tif Lyso.csv	1.22849	1.20894	0.83266	1.13212	0.93645	0	1	212.327	100	4080	65.9281	25.0938	158.199	0.9125	0.82717	0.88889
	Lysotracker	Distal	Mock	Ctrl	Ctrl D2 Lyso Mock.tif Lyso.csv	0.64524	1.46385	0.15612	0.53943	0.3685	45	1	39.8114	100	765	89.1969	25.7781	45	0.45625	0.68313	0.85714
	Lysotracker	Distal	Mock	Ctrl	Ctrl D2 Lyso Mock.tif Lyso.csv	1.88117	1.24965	1.66531	1.62778	1.30259	6.18064	0.80252	424.655	100	8160	57.4875	26.9187	14.0362	1.36875	0.80023	0.82051
	Lysotracker	Distal	Mock	Ctrl	Ctrl D2 Lyso Mock.tif Lyso.csv	1.53031	1.12554	1.19694	1.3097	1.16362	100.417	1	305.221	100	5865	65.4719	25.7781	116.565	1.14063	0.88846	0.86792
	Lysotracker	Distal	Mock	Ctrl	Ctrl D2 Lyso Mock.tif Lyso.csv	1.38763	2.89349	0.46837	1.31359	0.45398	0.94409	0.5854	119.434	100	2295	114.063	26.0063	170.538	0.45625	0.3456	0.81818
	Lysotracker	Distal	Mock	Ctrl	Ctrl D2 Lyso Mock.tif Lyso.csv	1.33019	1.66226	0.72857	1.24177	0.74704	7.16136	1	185.786	100	3570	28.2875	27.1469	30.9638	0.68438	0.60159	0.96552
	Lysotracker	Distal	Mock	Ctrl	Ctrl D2 Lyso Mock.tif Lyso.csv	4.40583	3.1593	4.31941	4.16833	1.31939	18.734	0.41819	1101.45	100	21165	80.0719	28.7437	21.2505	1.8771	0.31653	0.69748
	Lysotracker	Distal	Mock	Ctrl	Ctrl D2 Lyso Mock.tif Lyso.csv	0.82252	1.55299	0.26021	0.71729	0.46188	161.565	1	66.3523	100	1275	107.447	26.6906	146.31	0.45625	0.64392	0.90909
	Lysotracker	Distal	Mock	Ctrl	Ctrl D2 Lyso Mock.tif Lyso.csv	1.02021	1.38403	0.52041	0.95764	0.69192	180	1	132.705	100	2550	114.291	27.1469	153.435	0.68438	0.72253	0.90909
	Lysotracker	Distal	Mock	Ctrl	Ctrl D2 Lyso Mock.tif Lyso.csv	0.64524	1.46385	0.15612	0.53943	0.3685	45	1	39.8114	100	765	59.7688	28.0594	45	0.45625	0.68313	0.85714
	Lysotracker	Distal	Mock	Ctrl	Ctrl D2 Lyso Mock.tif Lyso.csv	1.14063	1.13493	0.62449	0.94995	0.83702	19.8053	1	159.246	100	3060	85.775	28.9719	36.8699	0.9125	0.88111	0.85714
	Lysotracker	Distal	Mock	Ctrl	Ctrl D2 Lyso Mock.tif Lyso.csv	0.82252	1.55299	0.26021	0.71729	0.46188	18.435	1	66.3523	100	1275	99.9188	28.9719	33.6901	0.45625	0.64392	0.90909
	Lysotracker	Distal	Mock	Ctrl	Ctrl D2 Lyso Mock.tif Lyso.csv	1.78171	1.34944	1.24898	1.46491	1.08557	25.5383	0.60189	318.491	100	6120	38.325	34.675	39.8056	1.36875	0.74105	0.77419
	Lysotracker	Distal	Mock	Ctrl	Ctrl D2 Lyso Mock.tif Lyso.csv	1.29047	1.94981	0.36429	0.95098	0.48773	47.6779	0.54299	92.8932	100	1785	78.2469	34.675	45	0.76092	0.51287	0.6087
	Lysotracker	Distal	Mock	Ctrl	Ctrl D2 Lyso Mock.tif Lyso.csv	0.72139	3	0.15612	0.77223	0.25741	90	0.80852	39.8114	100	765	78.9313	34.675	108.435	0.22813	0.33333	1
	Lysotracker	Distal	Mock	Ctrl	Ctrl D2 Lyso Mock.tif Lyso.csv	1.33019	1.36861	0.78062	1.16631	0.85219	12.3234	1	199.057	100	3825	0.45625	80.7563	30.9638	0.9125	0.73067	0.85714
	Lysotracker	Distal	Mock	Ctrl	Ctrl D2 Lyso Mock.tif Lyso.csv	1.02021	1.34027	0.46837	0.89402	0.66704	20.3007	1	119.434	100	2295	2.96563	80.3	26.565	0.68438	0.74612	0.85714
	Lysotracker	Distal	Mock	Ctrl	Ctrl D2 Lyso Mock.tif Lyso.csv	1.44279	1.24965	0.98878	1.25429	1.00372	165.537	0.98662	252.139	100	4845	57.4875	80.3	161.565	1.12916	0.80022	0.82609
	Lysotracker	Distal	Mock	Ctrl	Ctrl D2 Lyso Mock.tif Lyso.csv	1.02021	1.13876	0.57245	0.91105	0.80003	18.435	1	145.975	100	2805	29.6562	80.5281	153.435	0.9125	0.87814	0.81481
	Lysotracker	Distal	Mock	Ctrl	Ctrl D2 Lyso Mock.tif Lyso.csv	1.02021	1.41576	0.41633	0.8663	0.6119	172.982	1	106.164	100	2040	34.9031	80.3	153.435	0.68438	0.70633	0.8
	Lysotracker	Distal	Mock	Ctrl	Ctrl D2 Lyso Mock.tif Lyso.csv	2.10321	2.49843	1.30103	2.03438	0.81426	6.53841	0.64078	331.762	100	6375	60.4531	80.5281	167.471	0.9125	0.40025	0.81967
	Lysotracker	Distal	Mock	Ctrl	Ctrl D2 Lyso Mock.tif Lyso.csv	1.22849	1.55106	0.67653	1.15588	0.74522	0	1	172.516	100	3315	98.3219	80.5281	158.199	0.68438	0.64472	0.92857
	Lysotracker	Distal	Mock	Ctrl	Ctrl D2 Lyso Mock.tif Lyso.csv	1.14063	1.21815	0.62449	0.98417	0.80792	55.278	0.96737	159.246	100	3060	23.9531	81.4406	36.8699	0.9125	0.82091	0.88889
	Lysotracker	Distal	Mock	Ctrl	Ctrl D2 Lyso Mock.tif Lyso.csv	1.61309	1.11353	1.40511	1.41144	1.26753	20.8974	0.88715	358.303	100	6885	41.975	81.2125	171.87	1.36875	0.89804	0.81818
	Lysotracker	Distal	Mock	Ctrl	Ctrl D2 Lyso Mock.tif Lyso.csv	2.32643	1.89897	1.87348	2.12832	1.12078	6.05487	0.81526	477.737	100	9180	46.7656	81.4406	11.3099	1.14063	0.5266	0.85714
	Lysotracker	Distal	Mock	Ctrl	Ctrl D2 Lyso Mock.tif Lyso.csv	1.33019	1.42066	0.62449	1.06283	0.74812	62.4559	0.64303	159.246	100	3060	84.1781	82.3531	59.0362	0.9125	0.7039	0.75
	Lysotracker	Distal	Mock	Ctrl	Ctrl D2 Lyso Mock.tif Lyso.csv	1.44279	2.8581	0.57245	1.44332	0.50499	3.05775	0.80906	145.975	100	2805	7.98438	81.8969	18.435	0.45625	0.34988	0.95652
	Lysotracker	Distal	Mock	Ctrl	Ctrl D2 Lyso Mock.tif Lyso.csv	0.82252	2.03127	0.20816	0.73374	0.36122	58.2825	0.85737	53.0819	100	1020	101.288	82.125	56.3099	0.45625	0.4923	0.8
	Lysotracker	Distal	Mock	Ctrl	Ctrl D2 Lyso Mock.tif Lyso.csv	1.61309	1.11144	1.1449	1.27287	1.14524	43.8496	0.51305	291.95	100	5610	15.7406	83.2656	45	1.36875	0.89973	0.72131
	Lysotracker	Distal	Mock	Ctrl	Ctrl D2 Lyso Mock.tif Lyso.csv	1.33019	1.10166	0.93674	1.14627	1.04049	177.027	0.96454	238.868	100	4590	35.1313	82.3531	149.036	1.14063	0.90772	0.83721
	Lysotracker	Distal	Mock	Ctrl	Ctrl D2 Lyso Mock.tif Lyso.csv	1.46071	1.36398	0.93674	1.27547	0.9351	21.4348	0.89478	238.868	100	4590	7.3	83.4938	38.6598	1.05156	0.73315	0.83721
	Lysotracker	Distal	Mock	Ctrl	Ctrl D2 Lyso Mock.tif Lyso.csv	0.94058	1.80907	0.31225	0.84807	0.46879	0	0.91631	79.6228	100	1530	32.6219	82.3531	165.964	0.45625	0.55277	0.85714
	Lysotracker	Distal	Mock	Ctrl	Ctrl D2 Lyso Mock.tif Lyso.csv	2.92143	2.08201	2.81022	2.7294	1.31094	52.8724	0.68581	716.605	100	13770	56.575	84.6344	51.3402	1.61309	0.4803	0.80597
	Lysotracker	Distal	Mock	Ctrl	Ctrl D2 Lyso Mock.tif Lyso.csv	1.14063	1.01986	0.72857	0.97266	0.95372	2.771e-13	1	185.786	100	3570	68.2094	82.5813	126.87	0.9125	0.98052	0.93333
	Lysotracker	Distal	Mock	Ctrl	Ctrl D2 Lyso Mock.tif Lyso.csv	0.82252	1.06885	0.36429	0.7041	0.65875	90	1	92.8932	100	1785	80.0719	82.8094	123.69	0.68438	0.93559	0.875
	Lysotracker	Distal	Mock	Ctrl	Ctrl D2 Lyso Mock.tif Lyso.csv	1.14063	1.55944	0.52041	1.01651	0.65184	71.7778	1	132.705	100	2550	87.3719	83.95	53.1301	0.68438	0.64126	0.90909
	Lysotracker	Distal	Mock	Ctrl	Ctrl D2 Lyso Mock.tif Lyso.csv	2.16418	1.38062	2.13368	1.93668	1.40276	15.2184	0.86648	544.089	100	10455	101.059	84.1781	18.435	1.59688	0.72431	0.84536
	Lysotracker	Distal	Mock	Ctrl	Ctrl D2 Lyso Mock.tif Lyso.csv	0.64524	1.46385	0.15612	0.53943	0.3685	45	1	39.8114	100	765	38.325	83.7219	45	0.45625	0.68313	0.85714
	Lysotracker	Distal	Mock	Ctrl	Ctrl D2 Lyso Mock.tif Lyso.csv	0.96785	1	0.46837	0.77223	0.77223	0	1	119.434	100	2295	37.1844	83.7219	135	0.68438	1	1
	Lysotracker	Distal	Mock	Ctrl	Ctrl D2 Lyso Mock.tif Lyso.csv	2.16418	2.28293	1.50919	2.09447	0.91745	173.657	0.78426	384.843	100	7395	96.725	84.1781	161.565	1.14063	0.43803	0.80556
	Lysotracker	Distal	Mock	Ctrl	Ctrl D2 Lyso Mock.tif Lyso.csv	1.22849	1.29482	0.78062	1.13443	0.87613	170.538	1	199.057	100	3825	38.325	84.4063	158.199	0.9125	0.77231	0.85714
	Lysotracker	Distal	Mock	Ctrl	Ctrl D2 Lyso Mock.tif Lyso.csv	1.46071	1.27325	0.98878	1.26608	0.99437	12.8205	1	252.139	100	4845	51.5563	85.0906	38.6598	0.9125	0.78539	0.97436
	Lysotracker	Distal	Mock	Ctrl	Ctrl D2 Lyso Mock.tif Lyso.csv	1.53031	1.45864	0.98878	1.35512	0.92903	135.367	0.77463	252.139	100	4845	1.59688	84.4063	116.565	1.12315	0.68557	0.76
	Lysotracker	Distal	Mock	Ctrl	Ctrl D2 Lyso Mock.tif Lyso.csv	1.78171	1.09256	1.66531	1.52204	1.39309	45.8803	0.8852	424.655	100	8160	35.1313	84.4063	140.194	1.36875	0.91528	0.92754
	Lysotracker	Distal	Mock	Ctrl	Ctrl D2 Lyso Mock.tif Lyso.csv	0.72139	1.4676	0.20816	0.62368	0.42497	90	0.85737	53.0819	100	1020	69.35	84.6344	108.435	0.45625	0.68139	0.8
	Lysotracker	Distal	Mock	Ctrl	Ctrl D2 Lyso Mock.tif Lyso.csv	1.78171	1.07074	1.71735	1.53012	1.42904	45	1	437.925	100	8415	85.5469	85.775	39.8056	1.36875	0.93394	0.95652
	Lysotracker	Distal	Mock	Ctrl	Ctrl D2 Lyso Mock.tif Lyso.csv	0.64524	1.46385	0.15612	0.53943	0.3685	45	1	39.8114	100	765	0	85.5469	45	0.45625	0.68313	0.85714
	Lysotracker	Distal	Mock	Ctrl	Ctrl D2 Lyso Mock.tif Lyso.csv	0.64524	1	0.20816	0.51482	0.51482	0	1	53.0819	100	1020	70.7188	85.0906	135	0.45625	1	1
	Lysotracker	Distal	Mock	Ctrl	Ctrl D2 Lyso Mock.tif Lyso.csv	1.02021	2.16507	0.26021	0.84693	0.39118	173.953	0.64114	66.3523	100	1275	23.0406	85.3188	153.435	0.45625	0.46188	0.66667
	Lysotracker	Distal	Mock	Ctrl	Ctrl D2 Lyso Mock.tif Lyso.csv	1.02021	1.93571	0.36429	0.94754	0.48951	171.65	1	92.8932	100	1785	30.7969	85.775	153.435	0.45625	0.51661	0.93333
	Lysotracker	Distal	Mock	Ctrl	Ctrl D2 Lyso Mock.tif Lyso.csv	1.14063	1.37205	0.57245	1.00002	0.72885	164.929	1	145.975	100	2805	37.8688	85.775	143.13	0.68438	0.72883	0.95652
	Lysotracker	Distal	Mock	Ctrl	Ctrl D2 Lyso Mock.tif Lyso.csv	1.66078	1.77644	0.98878	1.49548	0.84184	2.42068	0.72542	252.139	100	4845	106.991	86.6875	164.055	0.9125	0.56292	0.79167
	Lysotracker	Distal	Mock	Ctrl	Ctrl D2 Lyso Mock.tif Lyso.csv	1.66078	2.38508	0.67653	1.43335	0.60096	76.2236	0.45393	172.516	100	3315	39.0094	90.7938	74.0546	0.84901	0.41927	0.61905
	Lysotracker	Distal	Mock	Ctrl	Ctrl D3 Lyso Mock.tif Lyso.csv	1.73735	1.16803	1.66531	1.57373	1.34734	173.437	0.91441	424.655	100	8160	29.8844	28.5156	156.801	1.58756	0.85614	0.83117
	Lysotracker	Distal	Mock	Ctrl	Ctrl D3 Lyso Mock.tif Lyso.csv	2.32643	1.52484	2.08164	2.01034	1.3184	176.11	0.7552	530.819	100	10200	33.3062	28.2875	168.69	1.36875	0.65581	0.82474
	Lysotracker	Distal	Mock	Ctrl	Ctrl D3 Lyso Mock.tif Lyso.csv	1.93571	1.59217	1.45715	1.71871	1.07947	144.096	0.84675	371.573	100	7140	105.166	28.2875	135	1.22552	0.62807	0.8
	Lysotracker	Distal	Mock	Ctrl	Ctrl D3 Lyso Mock.tif Lyso.csv	2.88558	1.3746	3.07042	2.31816	1.68642	175.503	0.60976	782.957	100	15045	61.3656	28.9719	161.565	1.825	0.72748	0.79195
	Lysotracker	Distal	Mock	Ctrl	Ctrl D3 Lyso Mock.tif Lyso.csv	0.96785	2.65383	0.20816	0.83868	0.31603	140.31	0.69813	53.0819	100	1020	43.8	28.5156	135	0.48393	0.37681	0.66667
	Lysotracker	Distal	Mock	Ctrl	Ctrl D3 Lyso Mock.tif Lyso.csv	2.10321	1.09894	2.23776	1.7695	1.61018	166.009	0.72966	570.63	100	10965	57.7156	28.7437	130.601	1.59688	0.90997	0.81905
	Lysotracker	Distal	Mock	Ctrl	Ctrl D3 Lyso Mock.tif Lyso.csv	1.53031	1.79761	0.67653	1.24436	0.69223	21.5499	0.69661	172.516	100	3315	54.75	29.6562	26.565	0.9125	0.5563	0.7027
	Lysotracker	Distal	Mock	Ctrl	Ctrl D3 Lyso Mock.tif Lyso.csv	1.02021	1.6053	0.41633	0.92247	0.57464	160.67	1	106.164	100	2040	112.922	29.2	153.435	0.68438	0.62294	0.8
	Lysotracker	Distal	Mock	Ctrl	Ctrl D3 Lyso Mock.tif Lyso.csv	2.04041	1.04305	1.92552	1.59912	1.53312	58.7038	0.78194	491.007	100	9435	49.0469	31.025	63.435	1.59688	0.95873	0.82222
	Lysotracker	Distal	Mock	Ctrl	Ctrl D3 Lyso Mock.tif Lyso.csv	1.73735	1.63469	0.93674	1.39631	0.85418	8.18212	0.51435	238.868	100	4590	68.2094	30.3406	23.1986	1.14063	0.61174	0.67925
	Lysotracker	Distal	Mock	Ctrl	Ctrl D3 Lyso Mock.tif Lyso.csv	0.72139	3	0.15612	0.77223	0.25741	0	0.96737	39.8114	100	765	6.84375	31.7094	161.565	0.22813	0.33333	1
	Lysotracker	Distal	Mock	Ctrl	Ctrl D3 Lyso Mock.tif Lyso.csv	0.96785	1.80907	0.31225	0.84807	0.46879	143.13	1	79.6228	100	1530	75.2813	85.5469	135	0.61247	0.55277	0.8
	Lysotracker	Distal	Mock	Ctrl	Ctrl D3 Lyso Mock.tif Lyso.csv	1.53031	1.35208	0.83266	1.19726	0.8855	156.24	0.77163	212.327	100	4080	70.2625	86.0031	153.435	0.9125	0.7396	0.8
	Lysotracker	Distal	Mock	Ctrl	Ctrl D3 Lyso Mock.tif Lyso.csv	1.66078	1.20002	1.35307	1.43783	1.19818	139.578	0.85429	345.032	100	6630	74.1406	86.0031	105.945	1.29047	0.83332	0.8125
	Lysotracker	Distal	Mock	Ctrl	Ctrl D3 Lyso Mock.tif Lyso.csv	2.55052	1.47938	1.97756	1.93001	1.30461	2.08364	0.40626	504.278	100	9690	20.5312	86.9156	10.3049	1.59688	0.67596	0.67257
	Lysotracker	Distal	Mock	Ctrl	Ctrl D3 Lyso Mock.tif Lyso.csv	1.22849	1.06375	0.78062	1.02824	0.96662	128.736	0.869	199.057	100	3825	53.6094	86.2313	111.801	1.12257	0.94007	0.78947
	Lysotracker	Distal	Mock	Ctrl	Ctrl D3 Lyso Mock.tif Lyso.csv	1.02021	1.38959	0.46837	0.91032	0.6551	124.573	0.88357	119.434	100	2295	103.797	86.9156	116.565	0.80654	0.71964	0.75
	Lysotracker	Distal	Mock	Ctrl	Ctrl D3 Lyso Mock.tif Lyso.csv	0.64524	1.46385	0.15612	0.53943	0.3685	45	1	39.8114	100	765	49.275	90.7938	45	0.45625	0.68313	0.85714
	Lysotracker	Distal	Mock	Ctrl	Ctrl D4 Lyso Mock.tif Lyso.csv	0.72139	3	0.15612	0.77223	0.25741	0	0.96737	39.8114	100	765	92.3906	23.4969	161.565	0.22813	0.33333	1
	Lysotracker	Distal	Mock	Ctrl	Ctrl D4 Lyso Mock.tif Lyso.csv	0.82252	1.06885	0.36429	0.7041	0.65875	90	1	92.8932	100	1785	29.4281	28.2875	123.69	0.68438	0.93559	0.875
	Lysotracker	Distal	Mock	Ctrl	Ctrl D4 Lyso Mock.tif Lyso.csv	1.8392	1.17427	1.56123	1.52782	1.30108	27.8595	0.92922	398.114	100	7650	39.4656	29.4281	29.7449	1.36875	0.8516	0.85714
	Lysotracker	Distal	Mock	Ctrl	Ctrl D4 Lyso Mock.tif Lyso.csv	1.02021	2	0.41633	1.02965	0.51482	0	1	106.164	100	2040	14.3719	28.5156	153.435	0.45625	0.5	1
	Lysotracker	Distal	Mock	Ctrl	Ctrl D4 Lyso Mock.tif Lyso.csv	1.66078	1.55518	0.98878	1.39925	0.89974	10.2663	0.72542	252.139	100	4845	73.9125	29.2	15.9454	1.12257	0.64301	0.77551
	Lysotracker	Distal	Mock	Ctrl	Ctrl D4 Lyso Mock.tif Lyso.csv	0.96785	1	0.46837	0.77223	0.77223	0	1	119.434	100	2295	69.35	28.9719	135	0.68438	1	1
	Lysotracker	Distal	Mock	Ctrl	Ctrl D4 Lyso Mock.tif Lyso.csv	0.64524	1	0.20816	0.51482	0.51482	0	1	53.0819	100	1020	72.0875	29.4281	135	0.45625	1	1
	Lysotracker	Distal	Mock	Ctrl	Ctrl D4 Lyso Mock.tif Lyso.csv	1.29047	1.13657	0.78062	1.06285	0.93514	45.0006	1	199.057	100	3825	28.5156	30.7969	45	0.9125	0.87984	0.96774
	Lysotracker	Distal	Mock	Ctrl	Ctrl D4 Lyso Mock.tif Lyso.csv	1.8392	1.4315	1.56123	1.68688	1.1784	177.747	0.92922	398.114	100	7650	42.8875	31.025	29.7449	1.32809	0.69857	0.84507
	Lysotracker	Distal	Mock	Ctrl	Ctrl D4 Lyso Mock.tif Lyso.csv	0.94058	1.38707	0.36429	0.8021	0.57827	100.901	0.80011	92.8932	100	1785	61.5938	29.8844	104.036	0.68438	0.72094	0.73684
	Lysotracker	Distal	Mock	Ctrl	Ctrl D4 Lyso Mock.tif Lyso.csv	0.82252	1.55299	0.26021	0.71729	0.46188	71.565	1	66.3523	100	1275	81.4406	30.5688	56.3099	0.45625	0.64392	0.90909
	Lysotracker	Distal	Mock	Ctrl	Ctrl D4 Lyso Mock.tif Lyso.csv	0.64524	1	0.20816	0.51482	0.51482	0	1	53.0819	100	1020	116.344	30.1125	135	0.45625	1	1
	Lysotracker	Distal	Mock	Ctrl	Ctrl D4 Lyso Mock.tif Lyso.csv	0.82252	1.55299	0.26021	0.71729	0.46188	161.565	1	66.3523	100	1275	7.3	30.3406	146.31	0.45625	0.64392	0.90909
	Lysotracker	Distal	Mock	Ctrl	Ctrl D4 Lyso Mock.tif Lyso.csv	2.90356	2.20225	2.70613	2.75463	1.25082	41.9822	0.64623	690.064	100	13260	99.6906	32.3937	45	1.60425	0.45408	0.78195
	Lysotracker	Distal	Mock	Ctrl	Ctrl D4 Lyso Mock.tif Lyso.csv	0.64524	1	0.20816	0.51482	0.51482	0	1	53.0819	100	1020	87.1438	30.5688	135	0.45625	1	1
	Lysotracker	Distal	Mock	Ctrl	Ctrl D4 Lyso Mock.tif Lyso.csv	2.28125	1.29454	2.44593	2.00787	1.55102	55.5902	0.86422	623.712	100	11985	14.8281	32.6219	36.8699	1.69637	0.77247	0.8785
	Lysotracker	Distal	Mock	Ctrl	Ctrl D4 Lyso Mock.tif Lyso.csv	0.72139	3	0.15612	0.77223	0.25741	0	0.96737	39.8114	100	765	20.075	31.2531	161.565	0.22813	0.33333	1
	Lysotracker	Distal	Mock	Ctrl	Ctrl D4 Lyso Mock.tif Lyso.csv	0.96785	1.22859	0.41633	0.80701	0.65686	45.0002	1	106.164	100	2040	78.0188	31.9375	45	0.68438	0.81394	0.94118
	Lysotracker	Distal	Mock	Ctrl	Ctrl D4 Lyso Mock.tif Lyso.csv	1.66078	1.74942	0.93674	1.44448	0.82569	13.4361	0.80835	238.868	100	4590	82.8094	32.1656	15.9454	0.9125	0.57162	0.81818
	Lysotracker	Distal	Mock	Ctrl	Ctrl D4 Lyso Mock.tif Lyso.csv	2.24677	2.35236	1.56123	2.16242	0.91926	21.0477	0.6656	398.114	100	7650	85.5469	32.6219	23.9625	1.12257	0.42511	0.77922
	Lysotracker	Distal	Mock	Ctrl	Ctrl D4 Lyso Mock.tif Lyso.csv	0.96785	1	0.46837	0.77223	0.77223	0	1	119.434	100	2295	34.675	31.9375	135	0.68438	1	1
	Lysotracker	Distal	Mock	Ctrl	Ctrl D4 Lyso Mock.tif Lyso.csv	1.88117	1.40281	1.30103	1.5244	1.08667	87.2051	0.77435	331.762	100	6375	57.7156	33.7625	75.9638	1.14063	0.71285	0.80645
	Lysotracker	Distal	Mock	Ctrl	Ctrl D4 Lyso Mock.tif Lyso.csv	1.22849	1.12747	0.78062	1.05859	0.9389	14.0362	1	199.057	100	3825	65.9281	32.6219	21.8014	0.9125	0.88694	0.85714
	Lysotracker	Distal	Mock	Ctrl	Ctrl D4 Lyso Mock.tif Lyso.csv	0.64524	1	0.20816	0.51482	0.51482	0	1	53.0819	100	1020	91.7063	32.1656	135	0.45625	1	1
	Lysotracker	Distal	Mock	Ctrl	Ctrl D4 Lyso Mock.tif Lyso.csv	1.02021	1.41576	0.41633	0.8663	0.6119	7.01812	0.91441	106.164	100	2040	53.1531	33.0781	26.565	0.68438	0.70633	0.8
	Lysotracker	Distal	Mock	Ctrl	Ctrl D4 Lyso Mock.tif Lyso.csv	1.02021	1.38959	0.46837	0.91032	0.6551	34.5728	0.88357	119.434	100	2295	70.0344	33.5344	26.565	0.80654	0.71964	0.75
	Lysotracker	Distal	Mock	Ctrl	Ctrl D4 Lyso Mock.tif Lyso.csv	1.8392	1.34577	1.61327	1.66263	1.23544	9.31434	0.9602	411.384	100	7905	71.6313	34.2188	29.7449	1.36875	0.74307	0.87324
	Lysotracker	Distal	Mock	Ctrl	Ctrl D4 Lyso Mock.tif Lyso.csv	1.33019	1.22016	0.72857	1.0639	0.87193	18.8176	0.67517	185.786	100	3570	5.475	33.9906	30.9638	1.01012	0.81957	0.73684
	Lysotracker	Distal	Mock	Ctrl	Ctrl D4 Lyso Mock.tif Lyso.csv	1.22849	1.15093	0.78062	1.06954	0.92929	0	0.869	199.057	100	3825	25.7781	33.7625	158.199	1.12257	0.86886	0.78947
	Lysotracker	Distal	Mock	Ctrl	Ctrl D4 Lyso Mock.tif Lyso.csv	1.33019	1.43911	0.78062	1.19597	0.83105	9.89944	0.97567	199.057	100	3825	51.7844	34.2188	30.9638	0.9125	0.69487	0.85714
	Lysotracker	Distal	Mock	Ctrl	Ctrl D4 Lyso Mock.tif Lyso.csv	0.82252	1.55299	0.26021	0.71729	0.46188	161.565	1	66.3523	100	1275	47.6781	33.7625	146.31	0.45625	0.64392	0.90909
	Lysotracker	Distal	Mock	Ctrl	Ctrl D4 Lyso Mock.tif Lyso.csv	0.64524	1	0.20816	0.51482	0.51482	0	1	53.0819	100	1020	70.4906	33.9906	135	0.45625	1	1
	Lysotracker	Distal	Mock	Ctrl	Ctrl D4 Lyso Mock.tif Lyso.csv	1.14063	1.15921	0.67653	0.99926	0.86202	135	1	172.516	100	3315	49.7313	34.4469	126.87	0.9125	0.86266	0.89655
	Lysotracker	Distal	Mock	Ctrl	Ctrl D4 Lyso Mock.tif Lyso.csv	0.72139	3	0.15612	0.77223	0.25741	90	0.80852	39.8114	100	765	76.65	35.8156	108.435	0.22813	0.33333	1
	Lysotracker	Distal	Mock	Ctrl	Ctrl D4 Lyso Mock.tif Lyso.csv	1.02021	1.1068	0.41633	0.76596	0.69205	0	0.62056	106.164	100	2040	59.0844	79.6156	153.435	0.86616	0.90351	0.66667
	Lysotracker	Distal	Mock	Ctrl	Ctrl D4 Lyso Mock.tif Lyso.csv	1.46071	1.28164	1.04082	1.30324	1.01686	132.92	1	265.409	100	5100	3.19375	85.0906	128.66	1.12916	0.78025	0.90909
	Lysotracker	Distal	Mock	Ctrl	Ctrl D4 Lyso Mock.tif Lyso.csv	1.14063	1.14806	0.67653	0.99445	0.8662	76.2236	1	172.516	100	3315	78.9313	85.5469	126.87	0.9125	0.87104	0.89655
	Lysotracker	Distal	Mock	Ctrl	Ctrl D4 Lyso Mock.tif Lyso.csv	1.73735	1.61563	1.19694	1.56914	0.97123	177.218	0.9021	305.221	100	5865	30.5688	86.0031	156.801	0.9125	0.61895	0.90196
	Lysotracker	Distal	Mock	Ctrl	Ctrl D4 Lyso Mock.tif Lyso.csv	1.53031	1.08153	1.30103	1.3385	1.2376	120.964	1	331.762	100	6375	56.3469	86.6875	116.565	1.29047	0.92462	0.86207
	Lysotracker	Distal	Mock	Ctrl	Ctrl D4 Lyso Mock.tif Lyso.csv	1.02021	1.3083	0.41633	0.83277	0.63653	34.722	1	106.164	100	2040	73.2281	87.8281	26.565	0.68438	0.76435	0.8
	Lysotracker	Distal	Mock	Ctrl	Ctrl D4 Lyso Mock.tif Lyso.csv	0.82252	1.55299	0.26021	0.71729	0.46188	108.435	1	66.3523	100	1275	80.0719	87.1438	123.69	0.45625	0.64392	0.90909
	Lysotracker	Distal	Mock	Ctrl	Ctrl D4 Lyso Mock.tif Lyso.csv	1.46071	1.33596	0.98878	1.29688	0.97075	50.092	1	252.139	100	4845	91.7063	88.0563	38.6598	1.12257	0.74853	0.88372
	Lysotracker	Distal	Mock	Ctrl	Ctrl D4 Lyso Mock.tif Lyso.csv	0.64524	1.46385	0.15612	0.53943	0.3685	45	1	39.8114	100	765	49.5031	87.8281	45	0.45625	0.68313	0.85714
	Lysotracker	Distal	Mock	Ctrl	Ctrl D4 Lyso Mock.tif Lyso.csv	1.61309	1.07699	1.40511	1.38808	1.28886	32.5629	0.96737	358.303	100	6885	19.1625	88.7406	45	1.36875	0.92851	0.87097
	Lysotracker	Distal	Mock	Ctrl	Ctrl D4 Lyso Mock.tif Lyso.csv	2.04041	1.20424	1.87348	1.69486	1.40742	11.2081	0.74589	477.737	100	9180	26.0063	89.1969	26.565	1.59688	0.8304	0.8
	Lysotracker	Distal	Mock	Ctrl	Ctrl D4 Lyso Mock.tif Lyso.csv	1.8392	2.18758	0.98878	1.65954	0.75862	108.82	0.50245	252.139	100	4845	48.5906	88.0563	119.745	0.99637	0.45713	0.67857
	Lysotracker	Distal	Mock	Ctrl	Ctrl D4 Lyso Mock.tif Lyso.csv	2.67014	1.3744	3.38267	2.43299	1.77022	71.8051	0.91986	862.58	100	16575	96.9531	90.7938	70.0169	1.825	0.72759	0.90278
	Lysotracker	Distal	Mock	Ctrl	Ctrl D4 Lyso Mock.tif Lyso.csv	1.46071	1.08883	1.09286	1.23089	1.13047	41.9729	1	278.68	100	5355	104.938	89.6531	38.6598	1.14063	0.91842	0.84
	Lysotracker	Distal	Mock	Ctrl	Ctrl D4 Lyso Mock.tif Lyso.csv	3.26625	1.17945	5.51635	2.8782	2.44029	5.76113	0.81101	1406.67	100	27030	36.2719	90.1094	167.905	2.69311	0.84785	0.86179
	Lysotracker	Distal	Mock	Ctrl	Ctrl D4 Lyso Mock.tif Lyso.csv	1.53031	1.0711	1.09286	1.22082	1.13978	19.9682	0.88034	278.68	100	5355	88.9688	91.0219	63.435	1.14063	0.93362	0.84
	Lysotracker	Distal	Mock	Ctrl	Ctrl D4 Lyso Mock.tif Lyso.csv	2.15213	1.07881	2.70613	1.92798	1.78714	109.693	0.93866	690.064	100	13260	23.4969	91.9344	57.9946	1.825	0.92695	0.86667
	Lysotracker	Distal	Mock	Ctrl	Ctrl D4 Lyso Mock.tif Lyso.csv	1.29047	1.03922	0.8847	1.08195	1.04112	45.0021	0.98486	225.598	100	4335	21.2156	91.25	45	1.12916	0.96226	0.82927
	Lysotracker	Distal	Mock	Ctrl	Ctrl D4 Lyso Mock.tif Lyso.csv	0.96785	1	0.46837	0.77223	0.77223	0	1	119.434	100	2295	25.55	90.7938	135	0.68438	1	1
	Lysotracker	Distal	Mock	Ctrl	Ctrl D4 Lyso Mock.tif Lyso.csv	0.82252	1.55299	0.26021	0.71729	0.46188	161.565	1	66.3523	100	1275	97.6375	90.7938	146.31	0.45625	0.64392	0.90909
	Lysotracker	Distal	Mock	Ctrl	Ctrl D5 Lyso Mock.tif Lyso.csv	0.82252	1.55299	0.26021	0.71729	0.46188	161.565	1	66.3523	100	1275	22.5844	28.0594	146.31	0.45625	0.64392	0.90909
	Lysotracker	Distal	Mock	Ctrl	Ctrl D5 Lyso Mock.tif Lyso.csv	0.64524	1.46385	0.15612	0.53943	0.3685	45	1	39.8114	100	765	42.4313	28.5156	45	0.45625	0.68313	0.85714
	Lysotracker	Distal	Mock	Ctrl	Ctrl D5 Lyso Mock.tif Lyso.csv	3.76233	2.05038	4.9439	3.59259	1.75215	158.224	0.62517	1260.69	100	24225	78.2469	29.4281	165.964	2.01022	0.48771	0.82251
	Lysotracker	Distal	Mock	Ctrl	Ctrl D5 Lyso Mock.tif Lyso.csv	1.44279	1.23787	0.83266	1.14558	0.92545	12.1139	0.55869	212.327	100	4080	21.2156	29.4281	161.565	1.14063	0.80784	0.66667
	Lysotracker	Distal	Mock	Ctrl	Ctrl D5 Lyso Mock.tif Lyso.csv	1.29047	1.11326	0.83266	1.08639	0.97587	174.056	0.92693	212.327	100	4080	54.75	28.9719	135	1.12257	0.89827	0.8
	Lysotracker	Distal	Mock	Ctrl	Ctrl D5 Lyso Mock.tif Lyso.csv	1.64503	1.19935	1.45715	1.4917	1.24375	0	1	371.573	100	7140	52.925	29.4281	146.31	1.14063	0.83378	0.96552
	Lysotracker	Distal	Mock	Ctrl	Ctrl D5 Lyso Mock.tif Lyso.csv	2.04041	1.12467	1.82144	1.61501	1.43599	14.9952	0.77653	464.466	100	8925	19.3906	31.4812	26.565	1.59688	0.88915	0.81395
	Lysotracker	Distal	Mock	Ctrl	Ctrl D5 Lyso Mock.tif Lyso.csv	1.73735	1.52214	1.30103	1.58791	1.04321	168.593	0.89572	331.762	100	6375	36.7281	29.8844	156.801	1.14063	0.65697	0.86207
	Lysotracker	Distal	Mock	Ctrl	Ctrl D5 Lyso Mock.tif Lyso.csv	1.14063	1.14747	0.57245	0.91453	0.79699	129.69	0.97622	145.975	100	2805	83.2656	29.8844	143.13	0.9125	0.87148	0.81481
	Lysotracker	Distal	Mock	Ctrl	Ctrl D5 Lyso Mock.tif Lyso.csv	0.72139	3	0.15612	0.77223	0.25741	0	0.96737	39.8114	100	765	5.01875	30.3406	161.565	0.22813	0.33333	1
	Lysotracker	Distal	Mock	Ctrl	Ctrl D5 Lyso Mock.tif Lyso.csv	0.64524	1.46385	0.15612	0.53943	0.3685	135	1	39.8114	100	765	24.6375	30.5688	135	0.45625	0.68313	0.85714
	Lysotracker	Distal	Mock	Ctrl	Ctrl D5 Lyso Mock.tif Lyso.csv	2.67014	1.76483	2.13368	2.18963	1.2407	165.913	0.47686	544.089	100	10455	83.95	39.0094	160.017	1.70126	0.56663	0.7069
	Lysotracker	Distal	Mock	Ctrl	Ctrl D5 Lyso Mock.tif Lyso.csv	1.16321	1.57659	0.52041	1.02208	0.64829	7.68813	0.88747	132.705	100	2550	42.8875	84.6344	168.69	0.68438	0.63428	0.8
	Lysotracker	Distal	Mock	Ctrl	Ctrl D5 Lyso Mock.tif Lyso.csv	1.78171	1.17936	1.40511	1.45256	1.23165	70.9106	0.67712	358.303	100	6885	16.425	86.2313	39.8056	1.4152	0.84792	0.76056
	Lysotracker	Distal	Mock	Ctrl	Ctrl D5 Lyso Mock.tif Lyso.csv	1.22849	1.31212	0.62449	1.02142	0.77845	97.6276	0.78054	159.246	100	3060	38.7813	84.8625	111.801	0.9125	0.76212	0.75
	Lysotracker	Distal	Mock	Ctrl	Ctrl D5 Lyso Mock.tif Lyso.csv	0.96785	1.22859	0.41633	0.80701	0.65686	45.0002	1	106.164	100	2040	60.4531	85.775	45	0.68438	0.81394	0.94118
	Lysotracker	Distal	Mock	Ctrl	Ctrl D5 Lyso Mock.tif Lyso.csv	1.66078	1.45067	1.35307	1.58088	1.08976	6.15401	0.85429	345.032	100	6630	1.825	85.775	164.055	1.14063	0.68933	0.85246
	Lysotracker	Distal	Mock	Ctrl	Ctrl D5 Lyso Mock.tif Lyso.csv	0.82252	2.70203	0.15612	0.73288	0.27123	118.155	0.64303	39.8114	100	765	28.7437	85.5469	123.69	0.40831	0.37009	0.66667
	Lysotracker	Distal	Mock	Ctrl	Ctrl D5 Lyso Mock.tif Lyso.csv	1.33019	1.24825	0.93674	1.22016	0.97749	0	1	238.868	100	4590	54.2938	85.5469	149.036	0.9125	0.80112	0.94737
	Lysotracker	Distal	Mock	Ctrl	Ctrl D5 Lyso Mock.tif Lyso.csv	1.14063	1.37205	0.57245	1.00002	0.72885	105.071	1	145.975	100	2805	94.6719	85.5469	126.87	0.68438	0.72883	0.95652
	Lysotracker	Distal	Mock	Ctrl	Ctrl D5 Lyso Mock.tif Lyso.csv	1.88117	1.23522	1.71735	1.64345	1.33049	13.9622	0.89243	437.925	100	8415	4.33438	86.4594	14.0362	1.36875	0.80957	0.83544
	Lysotracker	Distal	Mock	Ctrl	Ctrl D5 Lyso Mock.tif Lyso.csv	0.64524	1.46385	0.15612	0.53943	0.3685	135	1	39.8114	100	765	0.45625	86.2313	135	0.45625	0.68313	0.85714
	Lysotracker	Distal	Mock	Ctrl	Ctrl D5 Lyso Mock.tif Lyso.csv	2.10321	1.88079	1.56123	1.93356	1.02806	170.334	0.69962	398.114	100	7650	81.8969	87.1438	167.471	1.14063	0.53169	0.77922
	Lysotracker	Distal	Mock	Ctrl	Ctrl D5 Lyso Mock.tif Lyso.csv	2.90356	1.69908	2.28981	2.22567	1.30993	136.827	0.40144	583.9	100	11220	95.8125	87.1438	135	1.68267	0.58855	0.69841
	Lysotracker	Distal	Mock	Ctrl	Ctrl D5 Lyso Mock.tif Lyso.csv	0.82252	2	0.20816	0.72807	0.36403	108.435	0.85737	53.0819	100	1020	102.884	88.0563	123.69	0.45625	0.5	0.8
	Lysotracker	Distal	Mock	Ctrl	Ctrl D5 Lyso Mock.tif Lyso.csv	1.78171	1.91338	0.93674	1.51065	0.78952	116.035	0.60639	238.868	100	4590	101.059	88.9688	129.806	1.06126	0.52263	0.75
	Lysotracker	Distal	Mock	FUS	FUS D1 Lyso Mock.tif Lyso.csv	0.82252	1.55299	0.26021	0.71729	0.46188	108.435	1	66.3523	100	1275	114.975	21.9	123.69	0.45625	0.64392	0.90909
	Lysotracker	Distal	Mock	FUS	FUS D1 Lyso Mock.tif Lyso.csv	0.82252	1.55299	0.26021	0.71729	0.46188	161.565	1	66.3523	100	1275	104.938	23.0406	146.31	0.45625	0.64392	0.90909
	Lysotracker	Distal	Mock	FUS	FUS D1 Lyso Mock.tif Lyso.csv	0.94058	1.19523	0.41633	0.79597	0.66596	0	1	106.164	100	2040	45.3969	24.1812	165.964	0.68438	0.83666	0.8
	Lysotracker	Distal	Mock	FUS	FUS D1 Lyso Mock.tif Lyso.csv	0.82252	1.29099	0.31225	0.71642	0.55493	45	1	79.6228	100	1530	5.475	26.2344	33.6901	0.64524	0.7746	0.8
	Lysotracker	Distal	Mock	FUS	FUS D1 Lyso Mock.tif Lyso.csv	0.94058	1.37649	0.31225	0.73976	0.53742	104.036	0.58905	79.6228	100	1530	23.9531	26.4625	104.036	0.68438	0.72648	0.63158
	Lysotracker	Distal	Mock	FUS	FUS D1 Lyso Mock.tif Lyso.csv	1.29047	1.31898	0.72857	1.10614	0.83863	45.0002	1	185.786	100	3570	15.0563	28.5156	45	0.9125	0.75816	0.93333
	Lysotracker	Distal	Mock	FUS	FUS D1 Lyso Mock.tif Lyso.csv	1.02021	1	0.62449	0.8917	0.8917	0	1	159.246	100	3060	66.6125	28.0594	116.565	0.9125	1	0.85714
	Lysotracker	Distal	Mock	FUS	FUS D1 Lyso Mock.tif Lyso.csv	0.64524	1	0.20816	0.51482	0.51482	0	1	53.0819	100	1020	52.6969	29.4281	135	0.45625	1	1
	Lysotracker	Distal	Mock	FUS	FUS D1 Lyso Mock.tif Lyso.csv	1.29047	2.58995	0.36429	1.09603	0.42319	136.431	0.68722	92.8932	100	1785	100.147	77.7906	135	0.63338	0.38611	0.66667
	Lysotracker	Distal	Mock	FUS	FUS D1 Lyso Mock.tif Lyso.csv	2.77526	1.62788	2.39389	2.22751	1.36834	110.689	0.50903	610.441	100	11730	80.5281	78.0188	99.4623	1.825	0.61429	0.65714
	Lysotracker	Distal	Mock	FUS	FUS D1 Lyso Mock.tif Lyso.csv	2.82175	1.67931	3.33063	2.6686	1.58911	92.3519	0.76685	849.31	100	16320	86.6875	78.0188	104.036	1.825	0.59548	0.86486
	Lysotracker	Distal	Mock	FUS	FUS D1 Lyso Mock.tif Lyso.csv	0.82252	2.70203	0.15612	0.73288	0.27123	61.845	0.64303	39.8114	100	765	9.125	80.5281	56.3099	0.40831	0.37009	0.66667
	Lysotracker	Distal	Mock	FUS	FUS D1 Lyso Mock.tif Lyso.csv	0.82252	1.06885	0.36429	0.7041	0.65875	0	1	92.8932	100	1785	115.888	79.8438	123.69	0.68438	0.93559	0.875
	Lysotracker	Distal	Mock	FUS	FUS D1 Lyso Mock.tif Lyso.csv	1.53031	2.22672	0.62449	1.33061	0.59757	163	0.59652	159.246	100	3060	42.4313	80.0719	153.435	0.68438	0.44909	0.8
	Lysotracker	Distal	Mock	FUS	FUS D1 Lyso Mock.tif Lyso.csv	1.16321	1.27854	0.62449	1.00827	0.78861	162.535	0.85073	159.246	100	3060	48.1344	80.5281	168.69	0.9125	0.78214	0.77419
	Lysotracker	Distal	Mock	FUS	FUS D1 Lyso Mock.tif Lyso.csv	2.16418	1.15028	2.60205	1.95216	1.69711	64.9917	0.88618	663.523	100	12750	1.825	81.8969	18.435	1.83683	0.86935	0.84746
	Lysotracker	Distal	Mock	FUS	FUS D1 Lyso Mock.tif Lyso.csv	1.66078	1.05605	1.35307	1.34883	1.27724	141.357	0.80533	345.032	100	6630	36.2719	80.5281	105.945	1.36875	0.94692	0.78788
	Lysotracker	Distal	Mock	FUS	FUS D1 Lyso Mock.tif Lyso.csv	1.73735	1.2098	1.45715	1.49818	1.23837	93.1527	0.80011	371.573	100	7140	78.7031	80.5281	113.199	1.36875	0.82658	0.82353
	Lysotracker	Distal	Mock	FUS	FUS D1 Lyso Mock.tif Lyso.csv	1.46071	1.26405	0.8847	1.19326	0.944	140.004	0.76344	225.598	100	4335	43.1156	81.2125	128.66	1.12257	0.79111	0.80952
	Lysotracker	Distal	Mock	FUS	FUS D1 Lyso Mock.tif Lyso.csv	3.04357	1.40379	4.0592	2.69356	1.91878	7.60943	0.86314	1035.1	100	19890	44.2563	82.8094	12.9946	2.165	0.71236	0.85714
	Lysotracker	Distal	Mock	FUS	FUS D1 Lyso Mock.tif Lyso.csv	1.02021	1.34027	0.46837	0.89402	0.66704	110.301	1	119.434	100	2295	62.7344	81.2125	116.565	0.68438	0.74612	0.85714
	Lysotracker	Distal	Mock	FUS	FUS D1 Lyso Mock.tif Lyso.csv	3.04357	1.60351	3.64287	2.72717	1.70076	32.5015	0.63865	928.932	100	17850	79.6156	82.5813	12.9946	1.95625	0.62363	0.72917
	Lysotracker	Distal	Mock	FUS	FUS D1 Lyso Mock.tif Lyso.csv	2.425	1.44397	2.39389	2.09791	1.45287	64.1111	0.70535	610.441	100	11730	83.2656	83.2656	41.1859	1.63268	0.69254	0.81416
	Lysotracker	Distal	Mock	FUS	FUS D1 Lyso Mock.tif Lyso.csv	1.02021	3.09301	0.20816	0.90542	0.29273	162.391	0.61088	53.0819	100	1020	111.325	81.8969	153.435	0.43349	0.32331	0.66667
	Lysotracker	Distal	Mock	FUS	FUS D1 Lyso Mock.tif Lyso.csv	0.82252	1.06885	0.36429	0.7041	0.65875	90	1	92.8932	100	1785	41.7469	82.125	123.69	0.68438	0.93559	0.875
	Lysotracker	Distal	Mock	FUS	FUS D1 Lyso Mock.tif Lyso.csv	2.66037	1.17279	3.85104	2.39802	2.04472	42.7086	0.87353	982.014	100	18870	55.8906	85.3188	59.0362	2.23657	0.85267	0.87059
	Lysotracker	Distal	Mock	FUS	FUS D1 Lyso Mock.tif Lyso.csv	0.96785	1.22859	0.41633	0.80701	0.65686	45.0002	1	106.164	100	2040	87.8281	83.7219	45	0.68438	0.81394	0.94118
	Lysotracker	Distal	Mock	FUS	FUS D1 Lyso Mock.tif Lyso.csv	2.34869	1.14333	2.75817	2.00379	1.75259	18.6785	0.71001	703.335	100	13515	4.79063	85.0906	29.0546	1.93571	0.87464	0.83465
	Lysotracker	Distal	Mock	FUS	FUS D1 Lyso Mock.tif Lyso.csv	1.78171	1.598	1.40511	1.69082	1.05809	112.08	0.8363	358.303	100	6885	10.2656	83.7219	129.806	1.18788	0.62578	0.81818
	Lysotracker	Distal	Mock	FUS	FUS D1 Lyso Mock.tif Lyso.csv	4.11258	2.01417	4.63165	3.44644	1.7111	173.388	0.54954	1181.07	100	22695	46.0813	83.95	160.56	1.825	0.49648	0.82407
	Lysotracker	Distal	Mock	FUS	FUS D1 Lyso Mock.tif Lyso.csv	1.02021	1.48549	0.31225	0.76849	0.51733	177.618	0.53248	79.6228	100	1530	60.225	83.95	153.435	0.68438	0.67318	0.63158
	Lysotracker	Distal	Mock	FUS	FUS D1 Lyso Mock.tif Lyso.csv	0.64524	1	0.20816	0.51482	0.51482	0	1	53.0819	100	1020	65.4719	83.95	135	0.45625	1	1
	Lysotracker	Distal	Mock	FUS	FUS D1 Lyso Mock.tif Lyso.csv	0.96785	1.80907	0.31225	0.84807	0.46879	53.1301	1	79.6228	100	1530	96.0406	84.6344	45	0.61247	0.55277	0.8
	Lysotracker	Distal	Mock	FUS	FUS D1 Lyso Mock.tif Lyso.csv	1.78171	1.069	1.61327	1.48183	1.38618	99.7579	0.90669	411.384	100	7905	52.6969	84.4063	129.806	1.36875	0.93545	0.91176
	Lysotracker	Distal	Mock	FUS	FUS D1 Lyso Mock.tif Lyso.csv	0.82252	1.06885	0.36429	0.7041	0.65875	0	1	92.8932	100	1785	8.66875	84.6344	123.69	0.68438	0.93559	0.875
	Lysotracker	Distal	Mock	FUS	FUS D2 Lyso Mock.tif Lyso.csv	0.82252	1.49607	0.26021	0.70403	0.47058	34.0993	0.87266	66.3523	100	1275	62.9625	27.1469	33.6901	0.61247	0.66842	0.71429
	Lysotracker	Distal	Mock	FUS	FUS D2 Lyso Mock.tif Lyso.csv	0.82252	1.55299	0.26021	0.71729	0.46188	161.565	1	66.3523	100	1275	18.9344	28.9719	146.31	0.45625	0.64392	0.90909
	Lysotracker	Distal	Mock	FUS	FUS D2 Lyso Mock.tif Lyso.csv	0.72139	1.4676	0.20816	0.62368	0.42497	90	0.85737	53.0819	100	1020	40.8344	28.9719	108.435	0.45625	0.68139	0.8
	Lysotracker	Distal	Mock	FUS	FUS D2 Lyso Mock.tif Lyso.csv	1.16321	1.27854	0.62449	1.00827	0.78861	162.535	0.85073	159.246	100	3060	85.3188	29.4281	168.69	0.9125	0.78214	0.77419
	Lysotracker	Distal	Mock	FUS	FUS D2 Lyso Mock.tif Lyso.csv	1.33019	1.41418	0.72857	1.14536	0.80992	129.443	0.87965	185.786	100	3570	70.2625	29.4281	120.964	0.96785	0.70713	0.75676
	Lysotracker	Distal	Mock	FUS	FUS D2 Lyso Mock.tif Lyso.csv	1.38763	2.77869	0.46837	1.28727	0.46327	93.1701	0.60639	119.434	100	2295	63.6469	29.8844	99.4623	0.45625	0.35988	0.85714
	Lysotracker	Distal	Mock	FUS	FUS D2 Lyso Mock.tif Lyso.csv	0.96785	1.59636	0.36429	0.86048	0.53903	135	1	92.8932	100	1785	72.5438	30.3406	135	0.64524	0.62642	0.875
	Lysotracker	Distal	Mock	FUS	FUS D2 Lyso Mock.tif Lyso.csv	1.66078	2.30973	0.78062	1.51515	0.65598	169.391	0.74565	199.057	100	3825	61.8219	31.4812	164.055	0.68438	0.43295	0.85714
	Lysotracker	Distal	Mock	FUS	FUS D2 Lyso Mock.tif Lyso.csv	1.16321	3.00303	0.31225	1.09266	0.36385	94.7312	0.55488	79.6228	100	1530	76.8781	32.3937	101.31	0.45625	0.333	0.75
	Lysotracker	Distal	Mock	FUS	FUS D2 Lyso Mock.tif Lyso.csv	1.78171	1.1403	1.56123	1.50556	1.32032	137.787	1	398.114	100	7650	105.394	82.5813	140.194	1.36875	0.87696	0.92308
	Lysotracker	Distal	Mock	FUS	FUS D2 Lyso Mock.tif Lyso.csv	1.02021	1.23565	0.52041	0.90485	0.73229	0	1	132.705	100	2550	50.6438	83.4938	153.435	0.68438	0.80929	0.90909
	Lysotracker	Distal	Mock	FUS	FUS D2 Lyso Mock.tif Lyso.csv	0.82252	1.55299	0.26021	0.71729	0.46188	161.565	1	66.3523	100	1275	41.0625	85.0906	146.31	0.45625	0.64392	0.90909
	Lysotracker	Distal	Mock	FUS	FUS D2 Lyso Mock.tif Lyso.csv	0.82252	1.55299	0.26021	0.71729	0.46188	18.435	1	66.3523	100	1275	17.7937	86.2313	33.6901	0.45625	0.64392	0.90909
	Lysotracker	Distal	Mock	FUS	FUS D2 Lyso Mock.tif Lyso.csv	1.73735	1.8847	1.1449	1.65753	0.87946	19.8675	0.7682	291.95	100	5610	25.55	86.6875	23.1986	1.02078	0.53059	0.8
	Lysotracker	Distal	Mock	FUS	FUS D2 Lyso Mock.tif Lyso.csv	0.82252	1.55299	0.26021	0.71729	0.46188	18.435	1	66.3523	100	1275	12.5469	86.4594	33.6901	0.45625	0.64392	0.90909
	Lysotracker	Distal	Mock	FUS	FUS D3 Lyso Mock.tif Lyso.csv	0.82252	1.06885	0.36429	0.7041	0.65875	0	1	92.8932	100	1785	101.059	29.2	123.69	0.68438	0.93559	0.875
	Lysotracker	Distal	Mock	FUS	FUS D3 Lyso Mock.tif Lyso.csv	1.64503	1.65927	0.98878	1.44532	0.87106	59.8942	0.85326	252.139	100	4845	17.1094	31.9375	56.3099	1.12257	0.60267	0.80851
	Lysotracker	Distal	Mock	FUS	FUS D3 Lyso Mock.tif Lyso.csv	1.64503	1.05777	1.61327	1.47402	1.39352	149.036	1	411.384	100	7905	73.4563	31.2531	123.69	1.36875	0.94539	0.92537
	Lysotracker	Distal	Mock	FUS	FUS D3 Lyso Mock.tif Lyso.csv	1.02021	1.6053	0.41633	0.92247	0.57464	160.67	1	106.164	100	2040	47.6781	31.9375	153.435	0.68438	0.62294	0.8
	Lysotracker	Distal	Mock	FUS	FUS D3 Lyso Mock.tif Lyso.csv	1.02021	1.34027	0.46837	0.89402	0.66704	20.3007	1	119.434	100	2295	34.9031	32.3937	26.565	0.68438	0.74612	0.85714
	Lysotracker	Distal	Mock	FUS	FUS D3 Lyso Mock.tif Lyso.csv	2.28125	1.22407	2.49797	1.97311	1.61193	36.7502	0.82922	636.982	100	12240	18.4781	33.9906	53.1301	1.8039	0.81695	0.85714
	Lysotracker	Distal	Mock	FUS	FUS D3 Lyso Mock.tif Lyso.csv	0.96785	2.65383	0.20816	0.83868	0.31603	39.6902	0.69813	53.0819	100	1020	9.35313	33.7625	45	0.48393	0.37681	0.66667
	Lysotracker	Distal	Mock	FUS	FUS D3 Lyso Mock.tif Lyso.csv	1.33019	1.08334	0.98878	1.16785	1.07801	83.7356	1	252.139	100	4845	28.2875	33.3062	120.964	1.14063	0.92307	0.88372
	Lysotracker	Distal	Mock	FUS	FUS D3 Lyso Mock.tif Lyso.csv	0.64524	1.46385	0.15612	0.53943	0.3685	45	1	39.8114	100	765	25.55	34.4469	45	0.45625	0.68313	0.85714
	Lysotracker	Distal	Mock	FUS	FUS D3 Lyso Mock.tif Lyso.csv	1.29047	1.16056	0.78062	1.07401	0.92542	122.886	1	199.057	100	3825	78.7031	35.1313	135	0.9125	0.86165	0.85714
	Lysotracker	Distal	Mock	FUS	FUS D3 Lyso Mock.tif Lyso.csv	2.34869	1.293	2.0296	1.82793	1.41371	17.355	0.43157	517.548	100	9945	17.1094	84.4063	29.0546	1.74674	0.7734	0.67826
	Lysotracker	Distal	Mock	FUS	FUS D3 Lyso Mock.tif Lyso.csv	2.16418	2.21535	1.56123	2.0985	0.94726	174.374	0.6656	398.114	100	7650	64.7875	83.2656	161.565	1.14063	0.4514	0.81081
	Lysotracker	Distal	Mock	FUS	FUS D3 Lyso Mock.tif Lyso.csv	1.88117	1.4199	1.45715	1.62307	1.14308	21.1164	0.84675	371.573	100	7140	84.6344	85.5469	14.0362	1.29047	0.70427	0.82353
	Lysotracker	Distal	Mock	FUS	FUS D3 Lyso Mock.tif Lyso.csv	2.16418	1.59696	1.35307	1.65867	1.03865	157.328	0.54947	345.032	100	6630	23.4969	86.0031	161.565	1.32673	0.62619	0.71233
	Lysotracker	Distal	Mock	FUS	FUS D3 Lyso Mock.tif Lyso.csv	1.22849	1.12747	0.78062	1.05859	0.9389	165.964	1	199.057	100	3825	26.6906	86.4594	158.199	0.9125	0.88694	0.85714
	Lysotracker	Distal	Mock	FUS	FUS D3 Lyso Mock.tif Lyso.csv	1.88117	2.25759	1.24898	1.89477	0.83929	175.522	0.80852	318.491	100	6120	40.3781	88.5125	165.964	0.9125	0.44295	0.85714
	Lysotracker	Distal	Mock	FUS	FUS D3 Lyso Mock.tif Lyso.csv	1.53031	1.34151	1.1449	1.39842	1.04242	12.4856	0.98798	291.95	100	5610	33.7625	90.7938	26.565	1.14063	0.74543	0.88
	Lysotracker	Distal	Mock	FUS	FUS D3 Lyso Mock.tif Lyso.csv	1.33019	1.46022	0.72857	1.16386	0.79704	18.9375	0.99252	185.786	100	3570	30.5688	90.7938	30.9638	0.9125	0.68483	0.84848
	Lysotracker	Distal	Mock	FUS	FUS D4 Lyso Mock.tif Lyso.csv	0.82252	1.5	0.31225	0.77223	0.51482	90	1	79.6228	100	1530	66.3844	27.375	123.69	0.45625	0.66667	1
	Lysotracker	Distal	Mock	FUS	FUS D4 Lyso Mock.tif Lyso.csv	2.25832	1.13267	2.44593	1.87815	1.65815	57.7547	0.92171	623.712	100	11985	48.3625	30.5688	45	1.59688	0.88287	0.92157
	Lysotracker	Distal	Mock	FUS	FUS D4 Lyso Mock.tif Lyso.csv	1.96241	1.36932	1.7694	1.75639	1.28267	143.977	0.75435	451.196	100	8670	54.5219	29.2	125.538	1.53089	0.73029	0.80952
	Lysotracker	Distal	Mock	FUS	FUS D4 Lyso Mock.tif Lyso.csv	0.64524	1.46385	0.15612	0.53943	0.3685	135	1	39.8114	100	765	2.28125	31.9375	135	0.45625	0.68313	0.85714
	Lysotracker	Distal	Mock	FUS	FUS D4 Lyso Mock.tif Lyso.csv	2.88558	1.32338	4.26736	2.6815	2.02625	4.94485	0.84746	1088.18	100	20910	80.3	85.5469	18.435	2.24515	0.75564	0.88172
	Lysotracker	Distal	Mock	FUS	FUS D4 Lyso Mock.tif Lyso.csv	2.60103	1.1886	2.81022	2.06226	1.73503	121.318	0.63744	716.605	100	13770	84.1781	83.95	142.125	1.93978	0.84132	0.78261
	Lysotracker	Distal	Mock	FUS	FUS D4 Lyso Mock.tif Lyso.csv	3.77614	2.51152	3.74695	3.46149	1.37824	27.4448	0.55753	955.473	100	18360	40.3781	86.6875	25.0169	1.63441	0.39816	0.75393
	Lysotracker	Distal	Mock	FUS	FUS D4 Lyso Mock.tif Lyso.csv	1.44279	1.50453	0.93674	1.33957	0.89036	173.914	0.96454	238.868	100	4590	89.1969	84.8625	161.565	0.9125	0.66466	0.87805
	Lysotracker	Distal	Mock	FUS	FUS D4 Lyso Mock.tif Lyso.csv	2.60103	2.38257	2.13368	2.54415	1.06782	175.567	0.62868	544.089	100	10455	16.6531	85.0906	164.745	1.14063	0.41971	0.83673
	Lysotracker	Distal	Mock	FUS	FUS D4 Lyso Mock.tif Lyso.csv	0.82252	1.65286	0.26021	0.74	0.44771	0	0.76359	66.3523	100	1275	32.85	84.8625	146.31	0.45625	0.60501	0.83333
	Lysotracker	Distal	Mock	FUS	FUS D4 Lyso Mock.tif Lyso.csv	2.3817	1.72704	1.92552	2.05769	1.19146	16.0371	0.66789	491.007	100	9435	52.6969	86.2313	16.6992	1.36875	0.57903	0.78723
	Lysotracker	Distal	Mock	FUS	FUS D4 Lyso Mock.tif Lyso.csv	1.33019	1.47404	0.78062	1.2104	0.82114	14.7192	0.97567	199.057	100	3825	23.2688	86.4594	30.9638	0.9125	0.67841	0.88235
	Lysotracker	Distal	Mock	FUS	FUS D4 Lyso Mock.tif Lyso.csv	1.02021	1.1852	0.46837	0.84071	0.70934	172.372	1	119.434	100	2295	51.3281	85.775	153.435	0.68438	0.84374	0.85714
	Lysotracker	Distal	Mock	FUS	FUS D4 Lyso Mock.tif Lyso.csv	0.82252	1.5	0.31225	0.77223	0.51482	0	1	79.6228	100	1530	59.0844	85.5469	146.31	0.45625	0.66667	1
	Lysotracker	Distal	Mock	FUS	FUS D4 Lyso Mock.tif Lyso.csv	3.98403	2.39556	4.52757	3.71614	1.55126	11.1543	0.62575	1154.53	100	22185	10.95	87.6	23.6294	1.825	0.41744	0.86567
	Lysotracker	Distal	Mock	FUS	FUS D4 Lyso Mock.tif Lyso.csv	2.34869	1.44317	2.18572	2.00406	1.38865	174.747	0.61844	557.359	100	10710	56.1188	85.775	150.945	1.59688	0.69292	0.77064
	Lysotracker	Distal	Mock	FUS	FUS D4 Lyso Mock.tif Lyso.csv	1.02021	1.66783	0.36429	0.87953	0.52735	59.0362	0.80011	92.8932	100	1785	31.2531	86.9156	63.435	0.64524	0.59958	0.77778
	Lysotracker	Distal	Mock	FUS	FUS D4 Lyso Mock.tif Lyso.csv	2.16418	1.26255	2.28981	1.91858	1.5196	2.83469	0.88676	583.9	100	11220	3.42188	86.9156	161.565	1.59688	0.79204	0.86275
	Lysotracker	Distal	Mock	FUS	FUS D4 Lyso Mock.tif Lyso.csv	1.96241	1.33832	1.50919	1.60364	1.19825	36.3557	0.58446	384.843	100	7395	31.9375	87.8281	35.5377	1.51517	0.7472	0.74359
	Lysotracker	Distal	Mock	FUS	FUS D4 Lyso Mock.tif Lyso.csv	1.46071	1.44806	0.78062	1.19968	0.82848	149.527	0.89835	199.057	100	3825	64.1031	86.6875	141.34	0.9125	0.69058	0.88235
	Lysotracker	Distal	Mock	FUS	FUS D4 Lyso Mock.tif Lyso.csv	3.29007	2.45463	2.70613	2.90819	1.18478	30.1673	0.4325	690.064	100	13260	0	89.425	33.6901	1.72365	0.40739	0.7027
	Lysotracker	Distal	Mock	FUS	FUS D5 Lyso Mock.tif Lyso.csv	1.14063	1.98392	0.31225	0.88811	0.44765	38.7356	0.58905	79.6228	100	1530	45.8531	22.3562	36.8699	0.64524	0.50405	0.66667
	Lysotracker	Distal	Mock	FUS	FUS D5 Lyso Mock.tif Lyso.csv	0.96785	1.8818	0.26021	0.78959	0.41959	45.0001	0.87266	66.3523	100	1275	15.5125	23.725	45	0.61247	0.53141	0.71429
	Lysotracker	Distal	Mock	FUS	FUS D5 Lyso Mock.tif Lyso.csv	0.82252	1.06885	0.36429	0.7041	0.65875	0	1	92.8932	100	1785	0.68438	23.4969	123.69	0.68438	0.93559	0.875
	Lysotracker	Distal	Mock	FUS	FUS D5 Lyso Mock.tif Lyso.csv	1.14063	1.2158	0.52041	0.89755	0.73824	125.783	0.88747	132.705	100	2550	77.7906	23.9531	143.13	0.86616	0.8225	0.76923
	Lysotracker	Distal	Mock	FUS	FUS D5 Lyso Mock.tif Lyso.csv	1.88117	1.90788	1.45715	1.88141	0.98612	0	0.94327	371.573	100	7140	73.6844	24.1812	165.964	0.9125	0.52414	0.93333
	Lysotracker	Distal	Mock	FUS	FUS D5 Lyso Mock.tif Lyso.csv	1.53031	1.84416	0.62449	1.21093	0.65663	25.1947	0.6952	159.246	100	3060	67.7531	25.0938	26.565	0.83021	0.54225	0.70588
	Lysotracker	Distal	Mock	FUS	FUS D5 Lyso Mock.tif Lyso.csv	2.88558	1.54871	3.33063	2.56273	1.65475	92.7948	0.60279	849.31	100	16320	14.6	24.6375	108.435	1.825	0.6457	0.79503
	Lysotracker	Distal	Mock	FUS	FUS D5 Lyso Mock.tif Lyso.csv	1.14063	1.06286	0.57245	0.88016	0.82811	33.4007	0.85327	145.975	100	2805	58.6281	25.55	36.8699	0.9125	0.94086	0.78571
	Lysotracker	Distal	Mock	FUS	FUS D5 Lyso Mock.tif Lyso.csv	2.16418	1.69529	1.66531	1.89594	1.11836	8.24698	0.63256	424.655	100	8160	109.728	26.4625	18.435	1.29966	0.58987	0.78049
	Lysotracker	Distal	Mock	FUS	FUS D5 Lyso Mock.tif Lyso.csv	2.10321	2.40716	1.1449	1.87323	0.77819	2.09935	0.56389	291.95	100	5610	32.6219	26.0063	167.471	0.9125	0.41543	0.73333
	Lysotracker	Distal	Mock	FUS	FUS D5 Lyso Mock.tif Lyso.csv	1.73735	1.22834	1.66531	1.61385	1.31384	92.8783	0.99117	424.655	100	8160	106.306	26.0063	113.199	1.36875	0.8141	0.88889
	Lysotracker	Distal	Mock	FUS	FUS D5 Lyso Mock.tif Lyso.csv	1.44279	1.93145	0.52041	1.13128	0.58571	169.781	0.4077	132.705	100	2550	26.6906	26.6906	161.565	0.68438	0.51775	0.66667
	Lysotracker	Distal	Mock	FUS	FUS D5 Lyso Mock.tif Lyso.csv	2.67014	1.2837	2.86226	2.16292	1.68491	12.7929	0.61749	729.875	100	14025	72.7719	28.2875	19.9831	2.02023	0.779	0.77465
	Lysotracker	Distal	Mock	FUS	FUS D5 Lyso Mock.tif Lyso.csv	2.75645	1.10785	4.00716	2.37746	2.14602	133.573	0.80698	1021.83	100	19635	15.2844	28.5156	155.556	2.28125	0.90265	0.875
	Lysotracker	Distal	Mock	FUS	FUS D5 Lyso Mock.tif Lyso.csv	1.44279	1.55776	0.83266	1.2851	0.82497	0.70073	0.85737	212.327	100	4080	19.6187	28.2875	161.565	0.9125	0.64195	0.8
	Lysotracker	Distal	Mock	FUS	FUS D5 Lyso Mock.tif Lyso.csv	0.82252	1.55299	0.26021	0.71729	0.46188	71.565	1	66.3523	100	1275	70.7188	28.7437	56.3099	0.45625	0.64392	0.90909
	Lysotracker	Distal	Mock	FUS	FUS D5 Lyso Mock.tif Lyso.csv	0.72139	1	0.26021	0.57559	0.57559	0	0.87266	66.3523	100	1275	43.8	28.7437	108.435	0.64524	1	0.71429
	Lysotracker	Distal	Mock	FUS	FUS D5 Lyso Mock.tif Lyso.csv	1.14063	1.28784	0.52041	0.92376	0.71729	26.565	1	132.705	100	2550	85.5469	80.0719	36.8699	0.68438	0.77649	0.90909
	Lysotracker	Distal	Mock	FUS	FUS D5 Lyso Mock.tif Lyso.csv	1.02021	1.26491	0.41633	0.81885	0.64736	168.69	0.7854	106.164	100	2040	98.55	79.3875	153.435	0.68438	0.79057	0.7619
	Lysotracker	Distal	Mock	FUS	FUS D5 Lyso Mock.tif Lyso.csv	1.33019	1.17012	0.8847	1.14807	0.98116	15.9137	0.91096	225.598	100	4335	7.3	80.3	149.036	1.0825	0.85461	0.80952
	Lysotracker	Distal	Mock	FUS	FUS D5 Lyso Mock.tif Lyso.csv	1.73735	2.70737	0.78062	1.64039	0.6059	166.829	0.6936	199.057	100	3825	10.7219	80.3	156.801	0.68438	0.36936	0.85714
	Lysotracker	Distal	Mock	FUS	FUS D5 Lyso Mock.tif Lyso.csv	0.82252	1.55299	0.26021	0.71729	0.46188	161.565	1	66.3523	100	1275	23.0406	80.3	146.31	0.45625	0.64392	0.90909
	Lysotracker	Distal	Mock	FUS	FUS D5 Lyso Mock.tif Lyso.csv	0.96785	1.29511	0.31225	0.71756	0.55405	35.7825	0.68581	79.6228	100	1530	111.781	81.2125	45	0.68438	0.77213	0.75
	Lysotracker	Distal	Mock	FUS	FUS D5 Lyso Mock.tif Lyso.csv	2.10321	1.73271	1.50919	1.8247	1.05309	173.408	0.69066	384.843	100	7395	104.709	81.2125	167.471	1.14063	0.57713	0.8169
	Lysotracker	Distal	Mock	FUS	FUS D5 Lyso Mock.tif Lyso.csv	3.00052	1.64386	3.48675	2.70146	1.64336	10.3221	0.75221	889.121	100	17085	21.6719	82.3531	8.74616	1.825	0.60832	0.8481
	Lysotracker	Distal	Mock	FUS	FUS D5 Lyso Mock.tif Lyso.csv	2.10321	1.89325	1.66531	2.00358	1.05828	106.797	0.67627	424.655	100	8160	51.3281	82.3531	102.529	1.25417	0.52819	0.77108
	Lysotracker	Distal	Mock	FUS	FUS D5 Lyso Mock.tif Lyso.csv	1.9491	1.08379	1.71735	1.53942	1.42041	91.3315	0.69741	437.925	100	8415	83.7219	84.4063	69.444	1.53089	0.92269	0.77647
	Lysotracker	Distal	Mock	FUS	FUS D5 Lyso Mock.tif Lyso.csv	0.72139	3	0.15612	0.77223	0.25741	0	0.96737	39.8114	100	765	115.203	83.0375	161.565	0.22813	0.33333	1
	Lysotracker	Distal	Mock	FUS	FUS D5 Lyso Mock.tif Lyso.csv	1.02021	1.93571	0.36429	0.94754	0.48951	171.65	1	92.8932	100	1785	16.6531	83.4938	153.435	0.45625	0.51661	0.93333
	Lysotracker	Distal	Mock	FUS	FUS D5 Lyso Mock.tif Lyso.csv	2.15213	1.08226	2.70613	1.93106	1.78428	77.3003	0.84558	690.064	100	13260	28.0594	85.0906	32.0054	1.825	0.92399	0.85246
	Lysotracker	Distal	Mock	FUS	FUS D5 Lyso Mock.tif Lyso.csv	1.88117	2.22613	1.1449	1.80142	0.80922	8.70465	0.64346	291.95	100	5610	38.325	83.7219	165.964	0.9125	0.44921	0.8
	Lysotracker	Distal	Mock	FUS	FUS D5 Lyso Mock.tif Lyso.csv	2.16418	1.23179	1.92552	1.73779	1.41078	159.611	0.71189	491.007	100	9435	47.2219	83.7219	161.565	1.56754	0.81182	0.78723
	Lysotracker	Distal	Mock	FUS	FUS D5 Lyso Mock.tif Lyso.csv	1.73735	1.88327	1.04082	1.57979	0.83885	24.0888	0.76359	265.409	100	5100	17.3375	85.3188	23.1986	1.05156	0.53099	0.76923
	Lysotracker	Distal	Mock	FUS	FUS D5 Lyso Mock.tif Lyso.csv	2.55052	1.48892	2.28981	2.08348	1.39933	9.72638	0.67468	583.9	100	11220	4.33438	85.775	10.3049	1.74674	0.67163	0.73333
	Lysotracker	Distal	Mock	FUS	FUS D5 Lyso Mock.tif Lyso.csv	1.14063	1.28784	0.52041	0.92376	0.71729	63.435	1	132.705	100	2550	1.825	86.0031	53.1301	0.68438	0.77649	0.90909
	Lysotracker	Distal	Mock	FUS	FUS D5 Lyso Mock.tif Lyso.csv	1.88117	1.00126	2.13368	1.64927	1.6472	139.065	0.97645	544.089	100	10455	7.3	85.775	165.964	1.59688	0.99875	0.88172
	Lysotracker	Distal	Mock	FUS	FUS D5 Lyso Mock.tif Lyso.csv	0.94058	2.18816	0.26021	0.85144	0.38911	174.848	0.76359	66.3523	100	1275	86.4594	86.0031	165.964	0.45625	0.45701	0.76923
	Lysotracker	Distal	Mock	FUS	FUS D5 Lyso Mock.tif Lyso.csv	1.33019	2.82144	0.36429	1.14397	0.40545	154.117	0.62123	92.8932	100	1785	11.1781	86.6875	149.036	0.57744	0.35443	0.7
	Lysotracker	Distal	Mock	FUS	FUS D5 Lyso Mock.tif Lyso.csv	0.96785	1	0.46837	0.77223	0.77223	0	1	119.434	100	2295	0	86.9156	135	0.68438	1	1
	Lysotracker	Distal	Mock	TDP43	TDP43 D1 Lyso.tif Lyso.csv	3.04357	1.80771	2.70613	2.49571	1.38059	75.7117	0.40961	690.064	100	13260	6.3875	29.6562	77.0054	1.825	0.55319	0.67974
	Lysotracker	Distal	Mock	TDP43	TDP43 D1 Lyso.tif Lyso.csv	2.60103	1.27129	2.81022	2.13279	1.67765	24.6906	0.48369	716.605	100	13770	29.2	28.9719	15.2551	2.0014	0.7866	0.72973
	Lysotracker	Distal	Mock	TDP43	TDP43 D1 Lyso.tif Lyso.csv	4.13152	2.18993	5.88064	4.04932	1.84906	169.833	0.7053	1499.56	100	28815	14.6	28.5156	173.66	2.09816	0.45664	0.84328
	Lysotracker	Distal	Mock	TDP43	TDP43 D1 Lyso.tif Lyso.csv	4.11258	2.11341	5.46431	3.83455	1.81439	47.2813	0.42686	1393.4	100	26775	32.85	30.7969	56.3099	2.52239	0.47317	0.69536
	Lysotracker	Distal	Mock	TDP43	TDP43 D1 Lyso.tif Lyso.csv	1.64503	1.07618	1.50919	1.43804	1.33624	29.3502	1	384.843	100	7395	109.272	29.4281	33.6901	1.36875	0.92921	0.90625
	Lysotracker	Distal	Mock	TDP43	TDP43 D1 Lyso.tif Lyso.csv	1.29047	1.21978	0.67653	1.02504	0.84035	153.014	0.92163	172.516	100	3315	19.8469	28.5156	135	0.9125	0.81982	0.86667
	Lysotracker	Distal	Mock	TDP43	TDP43 D1 Lyso.tif Lyso.csv	1.14063	1.37205	0.57245	1.00002	0.72885	15.0707	1	145.975	100	2805	38.0969	29.4281	36.8699	0.68438	0.72883	0.95652
	Lysotracker	Distal	Mock	TDP43	TDP43 D1 Lyso.tif Lyso.csv	0.82252	1.06885	0.36429	0.7041	0.65875	90	1	92.8932	100	1785	81.2125	28.9719	123.69	0.68438	0.93559	0.875
	Lysotracker	Distal	Mock	TDP43	TDP43 D1 Lyso.tif Lyso.csv	2.04041	1.34855	1.97756	1.8427	1.36642	56.9731	0.71744	504.278	100	9690	9.80938	31.2531	63.435	1.59688	0.74154	0.8172
	Lysotracker	Distal	Mock	TDP43	TDP43 D1 Lyso.tif Lyso.csv	1.33019	1.08334	0.98878	1.16785	1.07801	6.2644	1	252.139	100	4845	27.6031	29.6562	149.036	1.14063	0.92307	0.88372
	Lysotracker	Distal	Mock	TDP43	TDP43 D1 Lyso.tif Lyso.csv	1.53031	1.4294	0.8847	1.2689	0.88772	27.7937	0.91096	225.598	100	4335	35.8156	30.1125	26.565	0.9125	0.6996	0.85
	Lysotracker	Distal	Mock	TDP43	TDP43 D1 Lyso.tif Lyso.csv	0.82252	2.03127	0.20816	0.73374	0.36122	58.2825	0.85737	53.0819	100	1020	6.61563	30.3406	56.3099	0.45625	0.4923	0.8
	Lysotracker	Distal	Mock	TDP43	TDP43 D1 Lyso.tif Lyso.csv	1.46071	1.45928	0.8847	1.2821	0.87858	50.2003	0.98486	225.598	100	4335	21.4438	30.7969	51.3402	0.96785	0.68527	0.85
	Lysotracker	Distal	Mock	TDP43	TDP43 D1 Lyso.tif Lyso.csv	3.39132	1.27204	4.73573	2.76949	2.1772	176.171	0.48763	1207.61	100	23205	24.1812	30.5688	160.346	2.59767	0.78614	0.74897
	Lysotracker	Distal	Mock	TDP43	TDP43 D1 Lyso.tif Lyso.csv	0.96785	1.37971	0.36429	0.79997	0.57981	59.5273	1	92.8932	100	1785	62.7344	30.7969	45	0.68438	0.72479	0.875
	Lysotracker	Distal	Mock	TDP43	TDP43 D1 Lyso.tif Lyso.csv	0.82252	2.70203	0.15612	0.73288	0.27123	151.845	0.75398	39.8114	100	765	1.14063	30.3406	146.31	0.40831	0.37009	0.66667
	Lysotracker	Distal	Mock	TDP43	TDP43 D1 Lyso.tif Lyso.csv	1.73735	1.17621	1.50919	1.50338	1.27816	14.1679	0.95287	384.843	100	7395	95.1281	31.025	156.801	1.36875	0.85019	0.84058
	Lysotracker	Distal	Mock	TDP43	TDP43 D1 Lyso.tif Lyso.csv	0.64524	1.46385	0.15612	0.53943	0.3685	45	1	39.8114	100	765	44.4844	83.7219	45	0.45625	0.68313	0.85714
	Lysotracker	Distal	Mock	TDP43	TDP43 D1 Lyso.tif Lyso.csv	3.06062	1.75357	3.27858	2.70558	1.5429	160.943	0.67354	836.039	100	16065	86.9156	83.95	153.435	1.90611	0.57027	0.79747
	Lysotracker	Distal	Mock	TDP43	TDP43 D1 Lyso.tif Lyso.csv	2.10321	1.73388	1.61327	1.8872	1.08843	78.7715	0.45647	411.384	100	7905	112.922	83.4938	102.529	1.36875	0.57674	0.71264
	Lysotracker	Distal	Mock	TDP43	TDP43 D1 Lyso.tif Lyso.csv	1.29047	1.97558	0.52041	1.14413	0.57914	54.5626	0.88747	132.705	100	2550	79.6156	84.6344	45	0.71484	0.50618	0.8
	Lysotracker	Distal	Mock	TDP43	TDP43 D1 Lyso.tif Lyso.csv	0.64524	1.46385	0.15612	0.53943	0.3685	135	1	39.8114	100	765	14.6	84.1781	135	0.45625	0.68313	0.85714
	Lysotracker	Distal	Mock	TDP43	TDP43 D1 Lyso.tif Lyso.csv	1.46071	1.04103	1.19694	1.25957	1.20993	92.7861	0.93771	305.221	100	5865	97.6375	84.4063	128.66	1.29047	0.96059	0.82143
	Lysotracker	Distal	Mock	TDP43	TDP43 D1 Lyso.tif Lyso.csv	0.64524	1.46385	0.15612	0.53943	0.3685	45	1	39.8114	100	765	76.65	84.8625	45	0.45625	0.68313	0.85714
	Lysotracker	Distal	Mock	TDP43	TDP43 D1 Lyso.tif Lyso.csv	2.97439	1.75522	2.81022	2.50606	1.42777	160.174	0.55808	716.605	100	13770	78.475	84.6344	147.529	1.75758	0.56973	0.73469
	Lysotracker	Distal	Mock	TDP43	TDP43 D1 Lyso.tif Lyso.csv	3.4747	1.39678	5.15206	3.02698	2.16711	152.983	0.81322	1313.78	100	25245	11.6344	85.5469	156.801	2.41963	0.71593	0.84979
	Lysotracker	Distal	Mock	TDP43	TDP43 D1 Lyso.tif Lyso.csv	2.3817	1.05659	3.07042	2.03239	1.92354	18.0384	0.72216	782.957	100	15045	52.4688	86.2313	16.6992	2.05313	0.94644	0.82517
	Lysotracker	Distal	Mock	TDP43	TDP43 D1 Lyso.tif Lyso.csv	1.02021	1.37051	0.31225	0.73815	0.5386	10.278	0.58905	79.6228	100	1530	71.175	86.0031	26.565	0.68438	0.72966	0.63158
	Lysotracker	Distal	Mock	TDP43	TDP43 D1 Lyso.tif Lyso.csv	1.33019	1.13839	0.8847	1.1324	0.99473	42.8818	0.98486	225.598	100	4335	38.7813	87.8281	59.0362	1.12257	0.87843	0.82927
	Lysotracker	Distal	Mock	TDP43	TDP43 D1 Lyso.tif Lyso.csv	2.10321	1.86985	1.35307	1.79481	0.95987	22.1455	0.60634	345.032	100	6630	79.3875	88.2844	40.6013	1.25417	0.5348	0.72222
	Lysotracker	Distal	Mock	TDP43	TDP43 D1 Lyso.tif Lyso.csv	0.82252	1.55299	0.26021	0.71729	0.46188	161.565	1	66.3523	100	1275	36.0438	87.1438	146.31	0.45625	0.64392	0.90909
	Lysotracker	Distal	Mock	TDP43	TDP43 D2 Lyso.tif Lyso.csv	1.22849	1.46898	0.62449	1.08075	0.73572	178.093	0.96737	159.246	100	3060	2.28125	27.6031	158.199	0.68438	0.68075	0.88889
	Lysotracker	Distal	Mock	TDP43	TDP43 D2 Lyso.tif Lyso.csv	0.82252	1.55299	0.26021	0.71729	0.46188	18.435	1	66.3523	100	1275	5.70313	28.2875	33.6901	0.45625	0.64392	0.90909
	Lysotracker	Distal	Mock	TDP43	TDP43 D2 Lyso.tif Lyso.csv	0.64524	1.46385	0.15612	0.53943	0.3685	135	1	39.8114	100	765	10.0375	27.8313	135	0.45625	0.68313	0.85714
	Lysotracker	Distal	Mock	TDP43	TDP43 D2 Lyso.tif Lyso.csv	1.16321	2.49557	0.31225	0.99607	0.39913	2.00709	0.46542	79.6228	100	1530	34.4469	28.2875	168.69	0.45625	0.40071	0.66667
	Lysotracker	Distal	Mock	TDP43	TDP43 D2 Lyso.tif Lyso.csv	1.8392	1.20593	1.61327	1.57387	1.30511	71.5037	0.90669	411.384	100	7905	2.7375	30.1125	60.2551	1.36875	0.82924	0.86111
	Lysotracker	Distal	Mock	TDP43	TDP43 D2 Lyso.tif Lyso.csv	1.53031	1.7172	0.8847	1.39079	0.80992	2.86669	0.76344	225.598	100	4335	11.4062	29.8844	26.565	0.9125	0.58234	0.82927
	Lysotracker	Distal	Mock	TDP43	TDP43 D2 Lyso.tif Lyso.csv	1.02021	1.84391	0.31225	0.8562	0.46434	0	0.61515	79.6228	100	1530	93.5313	29.8844	153.435	0.68438	0.54233	0.66667
	Lysotracker	Distal	Mock	TDP43	TDP43 D2 Lyso.tif Lyso.csv	3.82407	1.41031	6.45309	3.40406	2.41369	14.8237	0.59083	1645.54	100	31620	111.325	30.7969	162.646	2.58728	0.70906	0.78981
	Lysotracker	Distal	Mock	TDP43	TDP43 D2 Lyso.tif Lyso.csv	0.72139	1.4676	0.20816	0.62368	0.42497	90	0.85737	53.0819	100	1020	100.375	29.8844	108.435	0.45625	0.68139	0.8
	Lysotracker	Distal	Mock	TDP43	TDP43 D2 Lyso.tif Lyso.csv	0.64524	1	0.20816	0.51482	0.51482	0	1	53.0819	100	1020	30.5688	30.1125	135	0.45625	1	1
	Lysotracker	Distal	Mock	TDP43	TDP43 D2 Lyso.tif Lyso.csv	1.02021	1.5362	0.46837	0.95713	0.62305	83.9526	1	119.434	100	2295	57.0313	30.3406	116.565	0.68438	0.65096	0.85714
	Lysotracker	Distal	Mock	TDP43	TDP43 D2 Lyso.tif Lyso.csv	2.10321	1.4184	2.08164	1.93891	1.36697	0.12008	0.88747	530.819	100	10200	76.1938	31.025	167.471	1.58756	0.70502	0.83333
	Lysotracker	Distal	Mock	TDP43	TDP43 D2 Lyso.tif Lyso.csv	0.64524	1.46385	0.15612	0.53943	0.3685	45	1	39.8114	100	765	80.0719	30.7969	45	0.45625	0.68313	0.85714
	Lysotracker	Distal	Mock	TDP43	TDP43 D2 Lyso.tif Lyso.csv	2.77526	1.16447	4.21532	2.49997	2.14687	91.094	0.90939	1074.91	100	20655	109.044	31.9375	99.4623	2.28125	0.85876	0.88043
	Lysotracker	Distal	Mock	TDP43	TDP43 D2 Lyso.tif Lyso.csv	1.46071	1.3942	0.98878	1.32485	0.95026	164.136	0.77463	252.139	100	4845	115.203	33.0781	128.66	1.14063	0.71726	0.76
	Lysotracker	Distal	Mock	TDP43	TDP43 D2 Lyso.tif Lyso.csv	1.33019	1.6912	0.46837	1.00426	0.59382	73.155	0.48227	119.434	100	2295	15.9688	85.0906	59.0362	0.79378	0.5913	0.6
	Lysotracker	Distal	Mock	TDP43	TDP43 D2 Lyso.tif Lyso.csv	3.67841	2.05014	4.21532	3.31713	1.618	53.4383	0.52717	1074.91	100	20655	32.1656	88.0563	60.2551	2.09701	0.48777	0.73303
	Lysotracker	Distal	Mock	TDP43	TDP43 D2 Lyso.tif Lyso.csv	2.04041	1.12254	1.82144	1.61348	1.43735	115.863	0.62033	464.466	100	8925	5.475	86.9156	63.435	1.59688	0.89084	0.74468
	Lysotracker	Distal	Mock	TDP43	TDP43 D2 Lyso.tif Lyso.csv	1.73735	1.16233	1.30103	1.3876	1.1938	108.004	0.66112	331.762	100	6375	29.2	85.3188	113.199	1.36875	0.86034	0.74627
	Lysotracker	Distal	Mock	TDP43	TDP43 D2 Lyso.tif Lyso.csv	3.71361	2.54309	4.16328	3.67159	1.44375	170.245	0.59187	1061.64	100	20400	14.3719	85.775	169.38	1.58133	0.39322	0.86957
	Lysotracker	Distal	Mock	TDP43	TDP43 D2 Lyso.tif Lyso.csv	0.72139	1.4676	0.20816	0.62368	0.42497	0	1	53.0819	100	1020	20.3031	86.0031	161.565	0.45625	0.68139	0.8
	Lysotracker	Distal	Mock	TDP43	TDP43 D2 Lyso.tif Lyso.csv	0.72139	3	0.15612	0.77223	0.25741	0	0.96737	39.8114	100	765	27.375	85.775	161.565	0.22813	0.33333	1
	Lysotracker	Distal	Mock	TDP43	TDP43 D2 Lyso.tif Lyso.csv	1.29047	1.36475	0.57245	0.99736	0.7308	154.518	0.58944	145.975	100	2805	101.744	86.4594	135	0.9125	0.73273	0.73333
	Lysotracker	Distal	Mock	TDP43	TDP43 D2 Lyso.tif Lyso.csv	0.82252	1.29099	0.31225	0.71642	0.55493	45	1	79.6228	100	1530	33.9906	87.8281	33.6901	0.64524	0.7746	0.8
	Lysotracker	Distal	Mock	TDP43	TDP43 D2 Lyso.tif Lyso.csv	1.02021	1.57118	0.36429	0.85367	0.54333	14.8724	0.80011	92.8932	100	1785	35.3594	87.8281	26.565	0.68438	0.63646	0.73684
	Lysotracker	Distal	Mock	TDP43	TDP43 D2 Lyso.tif Lyso.csv	0.82252	1.06885	0.36429	0.7041	0.65875	0	1	92.8932	100	1785	20.075	87.6	123.69	0.68438	0.93559	0.875
	Lysotracker	Distal	Mock	TDP43	TDP43 D2 Lyso.tif Lyso.csv	1.53031	1.16933	1.04082	1.24484	1.06457	153.539	0.8154	265.409	100	5100	8.66875	88.0563	153.435	1.14063	0.85519	0.8
	Lysotracker	Distal	Mock	TDP43	TDP43 D2 Lyso.tif Lyso.csv	1.73735	1.1559	1.61327	1.54088	1.33306	121.174	1	411.384	100	7905	23.9531	88.0563	113.199	1.36875	0.86513	0.88571
	Lysotracker	Distal	Mock	TDP43	TDP43 D2 Lyso.tif Lyso.csv	1.33019	1.17936	0.98878	1.2185	1.0332	26.565	1	252.139	100	4845	85.5469	88.5125	149.036	1.12257	0.84792	0.86364
	Lysotracker	Distal	Mock	TDP43	TDP43 D2 Lyso.tif Lyso.csv	1.33019	1.23301	0.83266	1.14333	0.92727	23.7448	0.95824	212.327	100	4080	25.3219	89.1969	30.9638	0.9125	0.81102	0.91429
	Lysotracker	Distal	Mock	TDP43	TDP43 D2 Lyso.tif Lyso.csv	0.72139	3	0.15612	0.77223	0.25741	90	0.80852	39.8114	100	765	113.378	88.9688	108.435	0.22813	0.33333	1
	Lysotracker	Distal	Mock	TDP43	TDP43 D3 Lyso.tif Lyso.csv	2.67014	1.36318	3.43471	2.44161	1.79111	81.7976	0.85129	875.851	100	16830	71.6313	33.0781	70.0169	2.02023	0.73358	0.86275
	Lysotracker	Distal	Mock	TDP43	TDP43 D3 Lyso.tif Lyso.csv	1.64503	1.10494	1.35307	1.3797	1.24866	163.595	0.78627	345.032	100	6630	114.063	31.7094	146.31	1.36875	0.90502	0.8125
	Lysotracker	Distal	Mock	TDP43	TDP43 D3 Lyso.tif Lyso.csv	1.22849	1.49029	0.57245	1.04222	0.69934	6.88039	0.85327	145.975	100	2805	10.95	32.3937	21.8014	0.9125	0.67101	0.73333
	Lysotracker	Distal	Mock	TDP43	TDP43 D3 Lyso.tif Lyso.csv	3.39132	1.4732	4.63165	2.9475	2.00074	38.4531	0.80762	1181.07	100	22695	105.394	34.2188	47.7263	2.24573	0.67879	0.87255
	Lysotracker	Distal	Mock	TDP43	TDP43 D3 Lyso.tif Lyso.csv	1.14063	1.28784	0.52041	0.92376	0.71729	63.435	1	132.705	100	2550	22.1281	33.0781	53.1301	0.68438	0.77649	0.90909
	Lysotracker	Distal	Mock	TDP43	TDP43 D3 Lyso.tif Lyso.csv	1.14063	1.28124	0.62449	1.00933	0.78778	122.067	1	159.246	100	3060	49.275	32.1656	126.87	0.9125	0.78049	0.85714
	Lysotracker	Distal	Mock	TDP43	TDP43 D3 Lyso.tif Lyso.csv	0.64524	1.46385	0.15612	0.53943	0.3685	135	1	39.8114	100	765	109.956	32.1656	135	0.45625	0.68313	0.85714
	Lysotracker	Distal	Mock	TDP43	TDP43 D3 Lyso.tif Lyso.csv	1.02021	1.5362	0.46837	0.95713	0.62305	173.953	1	119.434	100	2295	38.7813	32.3937	153.435	0.68438	0.65096	0.85714
	Lysotracker	Distal	Mock	TDP43	TDP43 D3 Lyso.tif Lyso.csv	0.64524	1.46385	0.15612	0.53943	0.3685	135	1	39.8114	100	765	43.5719	32.6219	135	0.45625	0.68313	0.85714
	Lysotracker	Distal	Mock	TDP43	TDP43 D3 Lyso.tif Lyso.csv	1.14063	1.01986	0.72857	0.97266	0.95372	2.771e-13	1	185.786	100	3570	55.2063	33.3062	126.87	0.9125	0.98052	0.93333
	Lysotracker	Distal	Mock	TDP43	TDP43 D3 Lyso.tif Lyso.csv	1.14063	1.14806	0.67653	0.99445	0.8662	166.224	1	172.516	100	3315	57.2594	33.3062	126.87	0.9125	0.87104	0.89655
	Lysotracker	Distal	Mock	TDP43	TDP43 D3 Lyso.tif Lyso.csv	1.9491	1.45948	1.56123	1.70328	1.16705	166.421	0.85726	398.114	100	7650	66.1563	33.5344	159.444	1.32673	0.68518	0.81081
	Lysotracker	Distal	Mock	TDP43	TDP43 D3 Lyso.tif Lyso.csv	0.64524	1.46385	0.15612	0.53943	0.3685	45	1	39.8114	100	765	6.15938	33.9906	45	0.45625	0.68313	0.85714
	Lysotracker	Distal	Mock	TDP43	TDP43 D3 Lyso.tif Lyso.csv	1.33019	1.13386	0.8847	1.13014	0.99672	11.3099	1	225.598	100	4335	14.8281	34.4469	30.9638	0.9125	0.88194	0.91892
	Lysotracker	Distal	Mock	TDP43	TDP43 D3 Lyso.tif Lyso.csv	0.64524	1.46385	0.15612	0.53943	0.3685	135	1	39.8114	100	765	36.9563	33.7625	135	0.45625	0.68313	0.85714
	Lysotracker	Distal	Mock	TDP43	TDP43 D3 Lyso.tif Lyso.csv	1.33019	1.21652	0.83266	1.13566	0.93353	17.2543	0.71853	212.327	100	4080	16.6531	34.9031	30.9638	1.14063	0.82202	0.74419
	Lysotracker	Distal	Mock	TDP43	TDP43 D3 Lyso.tif Lyso.csv	0.82252	1.29099	0.31225	0.71642	0.55493	45	1	79.6228	100	1530	104.709	34.9031	33.6901	0.64524	0.7746	0.8
	Lysotracker	Distal	Mock	TDP43	TDP43 D3 Lyso.tif Lyso.csv	0.82252	1.55299	0.26021	0.71729	0.46188	71.565	1	66.3523	100	1275	109.5	35.1313	56.3099	0.45625	0.64392	0.90909
	Lysotracker	Distal	Mock	TDP43	TDP43 D3 Lyso.tif Lyso.csv	0.72139	1.5667	0.15612	0.55806	0.3562	0	0.5236	39.8114	100	765	80.5281	34.675	161.565	0.45625	0.63828	0.6
	Lysotracker	Distal	Mock	TDP43	TDP43 D3 Lyso.tif Lyso.csv	1.88117	1.13607	1.66531	1.55205	1.36616	64.1102	0.80252	424.655	100	8160	48.1344	36.9563	75.9638	1.53089	0.88023	0.78049
	Lysotracker	Distal	Mock	TDP43	TDP43 D3 Lyso.tif Lyso.csv	1.14063	1.33333	0.62449	1.02965	0.77223	90	1	159.246	100	3060	61.3656	35.1313	126.87	0.68438	0.75	1
	Lysotracker	Distal	Mock	TDP43	TDP43 D3 Lyso.tif Lyso.csv	1.22849	1.18367	0.72857	1.04787	0.88527	93.5625	0.99252	185.786	100	3570	49.7313	36.7281	68.1986	0.9125	0.84483	0.82353
	Lysotracker	Distal	Mock	TDP43	TDP43 D3 Lyso.tif Lyso.csv	1.66078	1.18125	1.30103	1.39884	1.18421	100.537	0.95449	331.762	100	6375	82.125	35.8156	105.945	1.14063	0.84656	0.84746
	Lysotracker	Distal	Mock	TDP43	TDP43 D3 Lyso.tif Lyso.csv	1.22849	1.12747	0.78062	1.05859	0.9389	14.0362	1	199.057	100	3825	109.956	36.7281	21.8014	0.9125	0.88694	0.85714
	Lysotracker	Distal	Mock	TDP43	TDP43 D3 Lyso.tif Lyso.csv	1.02021	1.13876	0.57245	0.91105	0.80003	161.565	1	145.975	100	2805	91.0219	36.2719	116.565	0.9125	0.87814	0.81481
	Lysotracker	Distal	Mock	TDP43	TDP43 D3 Lyso.tif Lyso.csv	1.66078	1.31327	1.30103	1.47494	1.12311	13.3908	1	331.762	100	6375	88.2844	88.9688	15.9454	1.14063	0.76146	0.87719
	Lysotracker	Distal	Mock	TDP43	TDP43 D3 Lyso.tif Lyso.csv	1.16321	1.14474	0.67653	0.99301	0.86745	151.236	1	172.516	100	3315	102.428	88.9688	168.69	0.9125	0.87356	0.8125
	Lysotracker	Distal	Mock	TDP43	TDP43 D3 Lyso.tif Lyso.csv	1.44279	1.28154	1.04082	1.30319	1.0169	80.355	0.89816	265.409	100	5100	77.1063	88.7406	108.435	1.14063	0.78031	0.83333
	Lysotracker	Distal	Mock	TDP43	TDP43 D3 Lyso.tif Lyso.csv	1.33019	1.08971	0.83266	1.07484	0.98635	78.5832	0.95824	212.327	100	4080	49.5031	90.3375	59.0362	0.9125	0.91768	0.88889
	Lysotracker	Distal	Mock	TDP43	TDP43 D3 Lyso.tif Lyso.csv	0.82252	2.03127	0.20816	0.73374	0.36122	58.2825	0.85737	53.0819	100	1020	79.6156	89.8813	56.3099	0.45625	0.4923	0.8
	Lysotracker	Distal	Mock	TDP43	TDP43 D3 Lyso.tif Lyso.csv	1.78171	1.33276	1.19694	1.42517	1.06934	130.859	0.75572	305.221	100	5865	91.0219	89.425	140.194	1.22436	0.75032	0.77966
	Lysotracker	Distal	Mock	TDP43	TDP43 D3 Lyso.tif Lyso.csv	2.10321	1.14732	2.39389	1.87003	1.62992	4.4455	0.90931	610.441	100	11730	52.925	90.1094	167.471	1.7744	0.8716	0.85981
	Lysotracker	Distal	Mock	TDP43	TDP43 D3 Lyso.tif Lyso.csv	1.14063	1.37205	0.57245	1.00002	0.72885	74.9293	1	145.975	100	2805	2.28125	91.0219	53.1301	0.68438	0.72883	0.95652
	Lysotracker	Distal	Mock	TDP43	TDP43 D3 Lyso.tif Lyso.csv	1.22849	1.26374	0.72857	1.08273	0.85677	24.3576	0.99252	185.786	100	3570	34.9031	90.7938	21.8014	0.9125	0.7913	0.84848
	Lysotracker	Distal	Mock	TDP43	TDP43 D3 Lyso.tif Lyso.csv	1.8392	1.08649	1.45715	1.41978	1.30675	88.9492	0.63409	371.573	100	7140	98.7781	90.1094	119.745	1.36875	0.92039	0.81159
	Lysotracker	Distal	Mock	TDP43	TDP43 D3 Lyso.tif Lyso.csv	1.29047	1.7551	0.46837	1.02306	0.58291	47.7202	0.79872	119.434	100	2295	10.0375	91.4781	45	0.79378	0.56977	0.75
	Lysotracker	Distal	Mock	TDP43	TDP43 D3 Lyso.tif Lyso.csv	1.44279	1.34333	0.98878	1.30046	0.96809	4.23202	1	252.139	100	4845	11.1781	91.25	18.435	0.9125	0.74442	0.88372
	Lysotracker	Distal	Mock	TDP43	TDP43 D3 Lyso.tif Lyso.csv	1.64503	1.07877	1.24898	1.30978	1.21414	94.9593	0.74338	318.491	100	6120	3.42188	92.1625	56.3099	1.36875	0.92699	0.8
	Lysotracker	Distal	Mock	TDP43	TDP43 D3 Lyso.tif Lyso.csv	0.64524	1.46385	0.15612	0.53943	0.3685	135	1	39.8114	100	765	101.744	90.7938	135	0.45625	0.68313	0.85714
	Lysotracker	Distal	Mock	TDP43	TDP43 D3 Lyso.tif Lyso.csv	1.02021	1.34027	0.46837	0.89402	0.66704	20.3007	1	119.434	100	2295	36.9563	91.4781	26.565	0.68438	0.74612	0.85714
	Lysotracker	Distal	Mock	TDP43	TDP43 D3 Lyso.tif Lyso.csv	2.24677	1.14955	2.18572	1.78862	1.55592	111.959	0.43406	557.359	100	10710	91.25	91.0219	113.962	1.99334	0.8699	0.7
	Lysotracker	Distal	Mock	TDP43	TDP43 D3 Lyso.tif Lyso.csv	1.22849	1.23614	0.62449	0.99141	0.80202	23.4238	0.93084	159.246	100	3060	32.85	92.1625	21.8014	0.9125	0.80897	0.77419
	Lysotracker	Distal	Mock	TDP43	TDP43 D3 Lyso.tif Lyso.csv	1.14063	3.8727	0.20816	1.01313	0.26161	31.7175	0.51291	53.0819	100	1020	40.15	93.3031	36.8699	0.40889	0.25822	0.57143
	Lysotracker	Distal	Mock	TDP43	TDP43 D3 Lyso.tif Lyso.csv	1.22849	1.61276	0.52041	1.03374	0.64098	159.495	0.88747	132.705	100	2550	48.8188	92.6188	158.199	0.68438	0.62006	0.8
	Lysotracker	Distal	Mock	TDP43	TDP43 D3 Lyso.tif Lyso.csv	1.02021	1.32727	0.52041	0.9378	0.70656	2.596e-14	1	132.705	100	2550	72.7719	92.6188	153.435	0.68438	0.75342	0.90909
	Lysotracker	Distal	Mock	TDP43	TDP43 D4 Lyso.tif Lyso.csv	1.73735	1.37956	1.19694	1.44998	1.05105	164.559	0.82406	305.221	100	5865	75.2813	31.2531	156.801	1.14063	0.72487	0.82143
	Lysotracker	Distal	Mock	TDP43	TDP43 D4 Lyso.tif Lyso.csv	2.24677	1.27882	2.49797	2.01675	1.57705	15.3466	0.96737	636.982	100	12240	65.2438	32.85	23.9625	1.59688	0.78197	0.88889
	Lysotracker	Distal	Mock	TDP43	TDP43 D4 Lyso.tif Lyso.csv	0.64524	1.46385	0.15612	0.53943	0.3685	135	1	39.8114	100	765	68.8938	32.1656	135	0.45625	0.68313	0.85714
	Lysotracker	Distal	Mock	TDP43	TDP43 D4 Lyso.tif Lyso.csv	0.94058	2.18816	0.26021	0.85144	0.38911	174.848	0.76359	66.3523	100	1275	26.4625	32.6219	165.964	0.45625	0.45701	0.76923
	Lysotracker	Distal	Mock	TDP43	TDP43 D4 Lyso.tif Lyso.csv	1.14063	1.15921	0.67653	0.99926	0.86202	135	1	172.516	100	3315	69.5781	32.3937	126.87	0.9125	0.86266	0.89655
	Lysotracker	Distal	Mock	TDP43	TDP43 D4 Lyso.tif Lyso.csv	2.16418	2.04692	1.50919	1.98325	0.9689	86.3016	0.61287	384.843	100	7395	73	32.6219	108.435	1.14063	0.48854	0.78378
	Lysotracker	Distal	Mock	TDP43	TDP43 D4 Lyso.tif Lyso.csv	1.53031	1.09158	1.40511	1.39745	1.28021	171.999	1	358.303	100	6885	111.325	32.6219	116.565	1.36875	0.9161	0.88525
	Lysotracker	Distal	Mock	TDP43	TDP43 D4 Lyso.tif Lyso.csv	0.64524	1	0.20816	0.51482	0.51482	0	1	53.0819	100	1020	18.4781	33.0781	135	0.45625	1	1
	Lysotracker	Distal	Mock	TDP43	TDP43 D4 Lyso.tif Lyso.csv	1.22849	1.12599	0.83266	1.09259	0.97033	69.1832	1	212.327	100	4080	94.4438	33.3062	111.801	1.12257	0.88811	0.82051
	Lysotracker	Distal	Mock	TDP43	TDP43 D4 Lyso.tif Lyso.csv	1.02021	1.23565	0.52041	0.90485	0.73229	0	1	132.705	100	2550	38.7813	33.7625	153.435	0.68438	0.80929	0.90909
	Lysotracker	Distal	Mock	TDP43	TDP43 D4 Lyso.tif Lyso.csv	1.16321	1.26952	0.57245	0.96193	0.75771	14.1504	0.85327	145.975	100	2805	64.3313	33.9906	168.69	0.9125	0.7877	0.75862
	Lysotracker	Distal	Mock	TDP43	TDP43 D4 Lyso.tif Lyso.csv	0.64524	1.46385	0.15612	0.53943	0.3685	45	1	39.8114	100	765	75.7375	34.675	45	0.45625	0.68313	0.85714
	Lysotracker	Distal	Mock	TDP43	TDP43 D4 Lyso.tif Lyso.csv	3.76233	1.58314	5.93268	3.45812	2.18434	13.5814	0.76213	1512.83	100	29070	107.675	36.2719	14.0362	2.493	0.63166	0.84444
	Lysotracker	Distal	Mock	TDP43	TDP43 D4 Lyso.tif Lyso.csv	2.82175	1.49851	3.64287	2.63637	1.75933	170.935	0.8568	928.932	100	17850	19.6187	36.0438	165.964	1.825	0.66733	0.8805
	Lysotracker	Distal	Mock	TDP43	TDP43 D4 Lyso.tif Lyso.csv	1.73735	1.12397	1.56123	1.49474	1.32988	174.078	0.92922	398.114	100	7650	16.1969	36.5	23.1986	1.36875	0.8897	0.85714
	Lysotracker	Distal	Mock	TDP43	TDP43 D4 Lyso.tif Lyso.csv	3.32155	1.93936	3.48675	2.93423	1.51299	168.093	0.67901	889.121	100	17085	94.9	36.0438	164.055	1.59688	0.51564	0.84277
	Lysotracker	Distal	Mock	TDP43	TDP43 D4 Lyso.tif Lyso.csv	1.93571	1.04922	1.71735	1.51467	1.44362	167.292	0.80279	437.925	100	8415	74.3688	37.4125	45	1.36875	0.95309	0.86842
	Lysotracker	Distal	Mock	TDP43	TDP43 D4 Lyso.tif Lyso.csv	0.96785	1.22859	0.41633	0.80701	0.65686	135	1	106.164	100	2040	82.125	36.7281	135	0.68438	0.81394	0.94118
	Lysotracker	Distal	Mock	TDP43	TDP43 D4 Lyso.tif Lyso.csv	1.29047	1.29057	0.67653	1.05437	0.81697	157.097	0.95616	172.516	100	3315	14.3719	36.9563	135	0.9125	0.77485	0.89655
	Lysotracker	Distal	Mock	TDP43	TDP43 D4 Lyso.tif Lyso.csv	0.94058	1.80907	0.31225	0.84807	0.46879	0	0.91631	79.6228	100	1530	98.3219	87.3719	165.964	0.45625	0.55277	0.85714
	Lysotracker	Distal	Mock	TDP43	TDP43 D4 Lyso.tif Lyso.csv	2.10321	2.24358	1.30103	1.92783	0.85926	2.25762	0.7312	331.762	100	6375	79.3875	88.2844	12.5288	0.9125	0.44572	0.83333
	Lysotracker	Distal	Mock	TDP43	TDP43 D4 Lyso.tif Lyso.csv	2.10321	3.02697	1.1449	2.1006	0.69396	1.132	0.64346	291.95	100	5610	5.475	89.1969	12.5288	0.68438	0.33036	0.86275
	Lysotracker	Distal	Mock	TDP43	TDP43 D4 Lyso.tif Lyso.csv	1.29047	1.31898	0.72857	1.10614	0.83863	45.0002	1	185.786	100	3570	92.3906	89.425	45	0.9125	0.75816	0.93333
	Lysotracker	Distal	Mock	TDP43	TDP43 D4 Lyso.tif Lyso.csv	1.33019	1.79633	0.67653	1.24392	0.69248	11.3099	0.95616	172.516	100	3315	26.4625	89.6531	30.9638	0.68438	0.55669	0.92857
	Lysotracker	Distal	Mock	TDP43	TDP43 D4 Lyso.tif Lyso.csv	1.14063	1.33333	0.62449	1.02965	0.77223	0	1	159.246	100	3060	44.2563	92.6188	143.13	0.68438	0.75	1
	Lysotracker	Distal	Mock	TDP43	TDP43 D4 Lyso.tif Lyso.csv	2.32643	2.39376	1.66531	2.25291	0.94116	177.741	0.60416	424.655	100	8160	3.19375	93.7594	11.3099	1.14063	0.41775	0.7619
	Lysotracker	Distal	Mock	TDP43	TDP43 D4 Lyso.tif Lyso.csv	1.14063	1.12451	0.72857	1.02135	0.90826	180	1	185.786	100	3570	0.22813	93.075	126.87	0.9125	0.88927	0.93333
	Lysotracker	Distal	Mock	TDP43	TDP43 D4 Lyso.tif Lyso.csv	1.16321	1.72084	0.46837	1.01302	0.58868	0	0.79872	119.434	100	2295	34.9031	93.3031	168.69	0.68438	0.58111	0.75
	Lysotracker	Distal	Mock	TDP43	TDP43 D4 Lyso.tif Lyso.csv	1.22849	1.33204	0.72857	1.11161	0.83451	7.57285	0.99252	185.786	100	3570	65.2438	93.075	158.199	0.9125	0.75073	0.84848
	Lysotracker	Distal	Mock	TDP43	TDP43 D4 Lyso.tif Lyso.csv	1.16321	2.42283	0.36429	1.06008	0.43754	4.30782	0.71768	92.8932	100	1785	93.075	93.3031	168.69	0.45625	0.41274	0.82353
	Lysotracker	Distal	Mock	TDP43	TDP43 D4 Lyso.tif Lyso.csv	1.14063	1.13493	0.62449	0.94995	0.83702	19.8053	1	159.246	100	3060	83.95	93.9875	36.8699	0.9125	0.88111	0.85714
	Lysotracker	Distal	Mock	TDP43	TDP43 D4 Lyso.tif Lyso.csv	0.82252	2	0.20816	0.72807	0.36403	18.435	0.85737	53.0819	100	1020	96.725	93.7594	33.6901	0.45625	0.5	0.8
	Lysotracker	Distal	Mock	TDP43	TDP43 D4 Lyso.tif Lyso.csv	1.73735	1.36513	1.19694	1.44238	1.05659	169.022	0.80311	305.221	100	5865	22.5844	93.7594	156.801	1.14063	0.73253	0.80702
	Lysotracker	Distal	Mock	TDP43	TDP43 D4 Lyso.tif Lyso.csv	1.66078	1.62052	1.19694	1.57152	0.96976	1.58364	0.96418	305.221	100	5865	59.3125	93.5313	164.055	0.9125	0.61709	0.92
	Lysotracker	Distal	Mock	TDP43	TDP43 D4 Lyso.tif Lyso.csv	1.02021	1.23565	0.52041	0.90485	0.73229	0	1	132.705	100	2550	18.0219	93.9875	153.435	0.68438	0.80929	0.90909
	Lysotracker	Distal	Mock	TDP43	TDP43 D5 Lyso.tif Lyso.csv	1.14063	1.33333	0.62449	1.02965	0.77223	0	1	159.246	100	3060	5.24688	27.6031	143.13	0.68438	0.75	1
	Lysotracker	Distal	Mock	TDP43	TDP43 D5 Lyso.tif Lyso.csv	2.45698	2.0299	2.13368	2.34832	1.15686	6.40241	0.74009	544.089	100	10455	100.375	29.2	21.8014	1.36875	0.49263	0.82
	Lysotracker	Distal	Mock	TDP43	TDP43 D5 Lyso.tif Lyso.csv	1.88117	1.59647	1.35307	1.65842	1.03881	6.59874	0.78627	345.032	100	6630	83.95	29.2	14.0362	1.27334	0.62638	0.76471
	Lysotracker	Distal	Mock	TDP43	TDP43 D5 Lyso.tif Lyso.csv	1.14063	1.33333	0.62449	1.02965	0.77223	90	1	159.246	100	3060	53.8375	28.7437	126.87	0.68438	0.75	1
	Lysotracker	Distal	Mock	TDP43	TDP43 D5 Lyso.tif Lyso.csv	1.22849	2.89797	0.36429	1.15938	0.40006	12.5084	0.62123	92.8932	100	1785	35.1313	29.6562	21.8014	0.55367	0.34507	0.63636
	Lysotracker	Distal	Mock	TDP43	TDP43 D5 Lyso.tif Lyso.csv	0.82252	1.55299	0.26021	0.71729	0.46188	108.435	1	66.3523	100	1275	49.7313	28.9719	123.69	0.45625	0.64392	0.90909
	Lysotracker	Distal	Mock	TDP43	TDP43 D5 Lyso.tif Lyso.csv	3.26625	2.61552	2.60205	2.94369	1.12547	173.427	0.51674	663.523	100	12750	104.938	29.2	167.905	1.36875	0.38233	0.75188
	Lysotracker	Distal	Mock	TDP43	TDP43 D5 Lyso.tif Lyso.csv	1.02021	1	0.62449	0.8917	0.8917	0	1	159.246	100	3060	110.184	28.9719	116.565	0.9125	1	0.85714
	Lysotracker	Distal	Mock	TDP43	TDP43 D5 Lyso.tif Lyso.csv	0.64524	1.46385	0.15612	0.53943	0.3685	45	1	39.8114	100	765	99.2344	29.8844	45	0.45625	0.68313	0.85714
	Lysotracker	Distal	Mock	TDP43	TDP43 D5 Lyso.tif Lyso.csv	1.22849	1.12747	0.78062	1.05859	0.9389	75.9638	1	199.057	100	3825	47.45	32.1656	68.1986	0.9125	0.88694	0.85714
	Lysotracker	Distal	Mock	TDP43	TDP43 D5 Lyso.tif Lyso.csv	3.06062	2.54627	2.49797	2.84578	1.11763	22.3263	0.55828	636.982	100	12240	38.7813	32.85	26.565	1.53089	0.39273	0.69565
	Lysotracker	Distal	Mock	TDP43	TDP43 D5 Lyso.tif Lyso.csv	1.14063	1.21153	0.52041	0.89597	0.73954	64.3299	0.70894	132.705	100	2550	85.775	32.1656	36.8699	0.86616	0.8254	0.74074
	Lysotracker	Distal	Mock	TDP43	TDP43 D5 Lyso.tif Lyso.csv	0.82252	1.5	0.31225	0.77223	0.51482	0	1	79.6228	100	1530	113.378	31.2531	146.31	0.45625	0.66667	1
	Lysotracker	Distal	Mock	TDP43	TDP43 D5 Lyso.tif Lyso.csv	0.96785	1.41491	0.31225	0.75001	0.53008	30.3211	0.61515	79.6228	100	1530	28.7437	32.3937	45	0.68438	0.70676	0.75
	Lysotracker	Distal	Mock	TDP43	TDP43 D5 Lyso.tif Lyso.csv	1.33019	1.08287	1.04082	1.19793	1.10626	63.435	1	265.409	100	5100	90.1094	31.9375	120.964	1.14063	0.92347	0.88889
	Lysotracker	Distal	Mock	TDP43	TDP43 D5 Lyso.tif Lyso.csv	0.64524	1	0.20816	0.51482	0.51482	0	1	53.0819	100	1020	5.93125	32.3937	135	0.45625	1	1
	Lysotracker	Distal	Mock	TDP43	TDP43 D5 Lyso.tif Lyso.csv	0.72139	1.4676	0.20816	0.62368	0.42497	0	1	53.0819	100	1020	12.3187	32.3937	161.565	0.45625	0.68139	0.8
	Lysotracker	Distal	Mock	TDP43	TDP43 D5 Lyso.tif Lyso.csv	1.53031	1.28939	1.1449	1.37098	1.06328	15.4173	1	291.95	100	5610	6.15938	33.7625	26.565	1.14063	0.77556	0.86275
	Lysotracker	Distal	Mock	TDP43	TDP43 D5 Lyso.tif Lyso.csv	1.53031	1.22197	1.24898	1.394	1.14078	70.3951	1	318.491	100	6120	36.2719	34.2188	63.435	1.14063	0.81835	0.90566
	Lysotracker	Distal	Mock	TDP43	TDP43 D5 Lyso.tif Lyso.csv	1.53031	1.82806	0.83266	1.39214	0.76154	5.78007	0.8852	212.327	100	4080	46.5375	33.7625	26.565	0.68438	0.54703	0.94118
	Lysotracker	Distal	Mock	TDP43	TDP43 D5 Lyso.tif Lyso.csv	1.88117	1.23715	1.61327	1.59412	1.28854	81.7643	0.83834	411.384	100	7905	23.9531	85.775	75.9638	1.36875	0.80831	0.84932
	Lysotracker	Distal	Mock	TDP43	TDP43 D5 Lyso.tif Lyso.csv	1.33019	1.8593	0.52041	1.10995	0.59697	29.7672	0.88747	132.705	100	2550	80.7563	84.6344	30.9638	0.68438	0.53784	0.83333
	Lysotracker	Distal	Mock	TDP43	TDP43 D5 Lyso.tif Lyso.csv	1.96241	1.06253	1.7694	1.54717	1.45612	98.0653	0.69874	451.196	100	8670	20.3031	84.6344	144.462	1.59688	0.94115	0.86076
	Lysotracker	Distal	Mock	TDP43	TDP43 D5 Lyso.tif Lyso.csv	0.82252	1.06885	0.36429	0.7041	0.65875	90	1	92.8932	100	1785	36.7281	84.4063	123.69	0.68438	0.93559	0.875
	Lysotracker	Distal	Mock	TDP43	TDP43 D5 Lyso.tif Lyso.csv	1.02021	1.41576	0.41633	0.8663	0.6119	7.01812	0.91441	106.164	100	2040	37.8688	85.775	26.565	0.68438	0.70633	0.8
	Lysotracker	Distal	Mock	TDP43	TDP43 D5 Lyso.tif Lyso.csv	1.22849	1.51692	0.57245	1.05149	0.69318	164.439	0.53049	145.975	100	2805	49.9594	87.1438	158.199	0.9125	0.65923	0.6875
	Lysotracker	Distal	Mock	TDP43	TDP43 D5 Lyso.tif Lyso.csv	0.94058	1.19523	0.41633	0.79597	0.66596	0	1	106.164	100	2040	102.2	87.8281	165.964	0.68438	0.83666	0.8
	Lysotracker	Distal	Mock	TDP43	TDP43 D5 Lyso.tif Lyso.csv	2.34869	4.02037	1.04082	2.30821	0.57413	21.9755	0.51263	265.409	100	5100	31.025	88.9688	29.0546	0.80971	0.24873	0.66667
	Lysotracker	Distal	Mock	TDP43	TDP43 D5 Lyso.tif Lyso.csv	1.14063	1.15921	0.67653	0.99926	0.86202	135	1	172.516	100	3315	8.44063	90.1094	126.87	0.9125	0.86266	0.89655
	Lysotracker	Distal	Mock	TDP43	TDP43 D6 Lyso.tif Lyso.csv	2.3817	1.07149	3.22654	2.09806	1.95808	36.61	0.89796	822.769	100	15810	6.61563	28.9719	16.6992	2.09701	0.93328	0.84932
	Lysotracker	Distal	Mock	TDP43	TDP43 D6 Lyso.tif Lyso.csv	1.38763	1.30429	0.8847	1.2121	0.92932	10.9956	0.91096	225.598	100	4335	81.2125	28.5156	170.538	0.9125	0.7667	0.85
	Lysotracker	Distal	Mock	TDP43	TDP43 D6 Lyso.tif Lyso.csv	1.9491	2.44532	1.19694	1.93046	0.78945	173.266	0.622	305.221	100	5865	83.0375	29.8844	159.444	0.9125	0.40894	0.80702
	Lysotracker	Distal	Mock	TDP43	TDP43 D6 Lyso.tif Lyso.csv	0.94058	1.38707	0.36429	0.8021	0.57827	169.099	0.8976	92.8932	100	1785	78.7031	31.2531	165.964	0.68438	0.72094	0.73684
	Lysotracker	Distal	Mock	TDP43	TDP43 D6 Lyso.tif Lyso.csv	1.29047	1.45013	0.67653	1.11764	0.77072	39.2652	1	172.516	100	3315	83.7219	31.9375	45	0.9125	0.68959	0.89655
	Lysotracker	Distal	Mock	TDP43	TDP43 D6 Lyso.tif Lyso.csv	1.53031	1.08153	1.30103	1.3385	1.2376	59.0362	1	331.762	100	6375	1.825	32.6219	63.435	1.29047	0.92462	0.86207
	Lysotracker	Distal	Mock	TDP43	TDP43 D6 Lyso.tif Lyso.csv	1.44279	1.45393	0.8847	1.27975	0.8802	174.557	0.91096	225.598	100	4335	57.4875	31.4812	161.565	0.9125	0.68779	0.85
	Lysotracker	Distal	Mock	TDP43	TDP43 D6 Lyso.tif Lyso.csv	1.33019	1.13386	0.8847	1.13014	0.99672	168.69	1	225.598	100	4335	3.87813	31.7094	149.036	0.9125	0.88194	0.91892
	Lysotracker	Distal	Mock	TDP43	TDP43 D6 Lyso.tif Lyso.csv	0.82252	1.55299	0.26021	0.71729	0.46188	71.565	1	66.3523	100	1275	17.7937	32.1656	56.3099	0.45625	0.64392	0.90909
	Lysotracker	Distal	Mock	TDP43	TDP43 D6 Lyso.tif Lyso.csv	1.78171	1.06434	1.71735	1.52555	1.43333	58.7588	0.91286	437.925	100	8415	92.6188	31.7094	129.806	1.36875	0.93955	0.88
	Lysotracker	Distal	Mock	TDP43	TDP43 D6 Lyso.tif Lyso.csv	0.82252	1.55299	0.26021	0.71729	0.46188	71.565	1	66.3523	100	1275	103.341	32.1656	56.3099	0.45625	0.64392	0.90909
	Lysotracker	Distal	Mock	TDP43	TDP43 D6 Lyso.tif Lyso.csv	0.64524	1.46385	0.15612	0.53943	0.3685	45	1	39.8114	100	765	85.775	33.0781	45	0.45625	0.68313	0.85714
	Lysotracker	Distal	Mock	TDP43	TDP43 D6 Lyso.tif Lyso.csv	1.14063	1.15921	0.67653	0.99926	0.86202	45	1	172.516	100	3315	48.8188	33.9906	36.8699	0.9125	0.86266	0.89655
	Lysotracker	Distal	Mock	TDP43	TDP43 D6 Lyso.tif Lyso.csv	0.64524	1.46385	0.15612	0.53943	0.3685	45	1	39.8114	100	765	16.8813	84.4063	45	0.45625	0.68313	0.85714
	Lysotracker	Distal	Mock	TDP43	TDP43 D6 Lyso.tif Lyso.csv	0.82252	1.55299	0.26021	0.71729	0.46188	108.435	1	66.3523	100	1275	18.0219	83.95	123.69	0.45625	0.64392	0.90909
	Lysotracker	Distal	Mock	TDP43	TDP43 D6 Lyso.tif Lyso.csv	0.82252	1.29099	0.31225	0.71642	0.55493	45	1	79.6228	100	1530	9.80938	84.8625	33.6901	0.64524	0.7746	0.8
	Lysotracker	Distal	Mock	TDP43	TDP43 D6 Lyso.tif Lyso.csv	3.10284	2.31692	3.1745	3.06019	1.3208	91.5529	0.54639	809.498	100	15555	32.6219	84.4063	107.103	1.59688	0.43161	0.7871
	Lysotracker	Distal	Mock	TDP43	TDP43 D6 Lyso.tif Lyso.csv	3.54145	1.42584	5.93268	3.28182	2.30168	90.1631	0.80123	1512.83	100	29070	67.7531	87.8281	75.0686	2.72392	0.70134	0.85714
	Lysotracker	Distal	Mock	TDP43	TDP43 D6 Lyso.tif Lyso.csv	4.49933	2.10673	6.81738	4.2763	2.02983	21.7198	0.70611	1738.43	100	33405	35.3594	87.3719	30.4655	2.34752	0.47467	0.85342
	Lysotracker	Distal	Mock	TDP43	TDP43 D6 Lyso.tif Lyso.csv	1.33019	1.16147	0.98878	1.20923	1.04112	45.0006	1	252.139	100	4845	23.725	86.0031	30.9638	1.12916	0.86098	0.88372
	Lysotracker	Distal	Mock	TDP43	TDP43 D6 Lyso.tif Lyso.csv	1.02021	1.34027	0.46837	0.89402	0.66704	20.3007	1	119.434	100	2295	25.3219	85.5469	26.565	0.68438	0.74612	0.85714
	Lysotracker	Distal	Mock	TDP43	TDP43 D6 Lyso.tif Lyso.csv	1.64503	1.21036	1.40511	1.47152	1.21577	102.492	1	358.303	100	6885	72.3156	85.0906	123.69	1.14063	0.8262	0.94737
	Lysotracker	Distal	Mock	TDP43	TDP43 D6 Lyso.tif Lyso.csv	3.36823	1.85284	4.00716	3.07463	1.65941	157.85	0.53502	1021.83	100	19635	59.3125	85.5469	151.699	2.04099	0.53971	0.78571
	Lysotracker	Distal	Mock	TDP43	TDP43 D6 Lyso.tif Lyso.csv	1.22849	1.12747	0.78062	1.05859	0.9389	14.0362	1	199.057	100	3825	43.5719	86.2313	21.8014	0.9125	0.88694	0.85714
	Lysotracker	Distal	Mock	TDP43	TDP43 D6 Lyso.tif Lyso.csv	0.64524	1	0.20816	0.51482	0.51482	0	1	53.0819	100	1020	28.9719	85.775	135	0.45625	1	1
	Lysotracker	Distal	Mock	TDP43	TDP43 D6 Lyso.tif Lyso.csv	1.22849	1.18561	0.78062	1.08554	0.91559	84.1159	0.97567	199.057	100	3825	77.5625	85.775	111.801	0.9125	0.84344	0.88235
	Lysotracker	Distal	Mock	TDP43	TDP43 D6 Lyso.tif Lyso.csv	1.73735	1.62036	1.1449	1.5369	0.94849	1.48615	0.62866	291.95	100	5610	20.9875	86.9156	23.1986	1.14063	0.61715	0.73333
	Lysotracker	Distal	Mock	TDP43	TDP43 D6 Lyso.tif Lyso.csv	0.72139	1.4676	0.20816	0.62368	0.42497	0	1	53.0819	100	1020	2.05313	86.4594	161.565	0.45625	0.68139	0.8
	Lysotracker	Distal	Mock	TDP43	TDP43 D6 Lyso.tif Lyso.csv	0.64524	1.46385	0.15612	0.53943	0.3685	45	1	39.8114	100	765	72.0875	87.6	45	0.45625	0.68313	0.85714
	Lysotracker	Distal	Mock	TDP43	TDP43 D6 Lyso.tif Lyso.csv	0.64524	1.46385	0.15612	0.53943	0.3685	45	1	39.8114	100	765	8.89688	87.8281	45	0.45625	0.68313	0.85714
	Lysotracker	Distal	Mock	TDP43	TDP43 D6 Lyso.tif Lyso.csv	2.8584	1.87164	2.81022	2.58783	1.38265	157.132	0.73501	716.605	100	13770	3.87813	87.6	151.39	1.7156	0.53429	0.82443
	Lysotracker	Distal	Mock	TDP43	TDP43 D6 Lyso.tif Lyso.csv	2.04041	1.26593	2.13368	1.85449	1.46493	12.596	0.97645	544.089	100	10455	93.075	89.6531	26.565	1.59688	0.78993	0.88172
	Lysotracker	Distal	Mock	TDP43	TDP43 D6 Lyso.tif Lyso.csv	0.96785	2.65383	0.20816	0.83868	0.31603	129.69	0.69813	53.0819	100	1020	27.8313	89.1969	135	0.48393	0.37681	0.66667
	Lysotracker	Distal	Mock	TDP43	TDP43 D6 Lyso.tif Lyso.csv	1.8392	1.60068	1.19694	1.56187	0.97575	64.8024	0.82406	305.221	100	5865	39.2375	91.25	60.2551	1.12257	0.62473	0.82143
	Lysotracker	Distal	Nocodazole	Ctrl	Ctrl D1 Lyso Noco.tif Lyso.csv	3.32155	1.36179	5.04798	2.95848	2.1725	114.457	0.55726	1287.23	100	24735	101.516	21.6719	105.945	2.52608	0.73433	0.76984
	Lysotracker	Distal	Nocodazole	Ctrl	Ctrl D1 Lyso Noco.tif Lyso.csv	1.33019	1.08287	1.04082	1.19793	1.10626	26.565	1	265.409	100	5100	40.15	23.9531	149.036	1.14063	0.92347	0.88889
	Lysotracker	Distal	Nocodazole	Ctrl	Ctrl D1 Lyso Noco.tif Lyso.csv	1.14063	1.14825	0.62449	0.95551	0.83215	61.287	0.93084	159.246	100	3060	81.6688	25.3219	36.8699	0.9125	0.87089	0.82759
	Lysotracker	Distal	Nocodazole	Ctrl	Ctrl D1 Lyso Noco.tif Lyso.csv	0.82252	1.14953	0.20816	0.55197	0.48017	0	0.51291	53.0819	100	1020	80.0719	25.7781	146.31	0.68438	0.86992	0.57143
	Lysotracker	Distal	Nocodazole	Ctrl	Ctrl D1 Lyso Noco.tif Lyso.csv	0.96785	1.37971	0.36429	0.79997	0.57981	149.527	1	92.8932	100	1785	30.5688	26.0063	135	0.68438	0.72479	0.875
	Lysotracker	Distal	Nocodazole	Ctrl	Ctrl D1 Lyso Noco.tif Lyso.csv	2.60103	1.25337	3.22654	2.26915	1.81044	171.414	0.81757	822.769	100	15810	7.98438	27.8313	15.2551	1.94867	0.79785	0.84354
	Lysotracker	Distal	Nocodazole	Ctrl	Ctrl D1 Lyso Noco.tif Lyso.csv	1.22849	1.3058	0.67653	1.06057	0.8122	106.236	0.92163	172.516	100	3315	38.0969	26.2344	111.801	0.9125	0.76581	0.83871
	Lysotracker	Distal	Nocodazole	Ctrl	Ctrl D1 Lyso Noco.tif Lyso.csv	1.73735	1.211	1.40511	1.47191	1.21545	175.136	0.94279	358.303	100	6885	49.9594	27.8313	23.1986	1.32673	0.82577	0.83077
	Lysotracker	Distal	Nocodazole	Ctrl	Ctrl D1 Lyso Noco.tif Lyso.csv	0.82252	2	0.20816	0.72807	0.36403	18.435	0.85737	53.0819	100	1020	52.4688	27.6031	33.6901	0.45625	0.5	0.8
	Lysotracker	Distal	Nocodazole	Ctrl	Ctrl D1 Lyso Noco.tif Lyso.csv	1.02021	1.03507	0.57245	0.86858	0.83915	135	0.97622	145.975	100	2805	19.8469	27.375	116.565	0.9125	0.96612	0.84615
	Lysotracker	Distal	Nocodazole	Ctrl	Ctrl D1 Lyso Noco.tif Lyso.csv	2.3817	1.19099	2.96634	2.1209	1.78078	78.4221	0.96722	756.416	100	14535	37.1844	29.8844	73.3008	1.825	0.83964	0.89764
	Lysotracker	Distal	Nocodazole	Ctrl	Ctrl D1 Lyso Noco.tif Lyso.csv	0.96785	1.37971	0.36429	0.79997	0.57981	120.473	1	92.8932	100	1785	31.2531	27.8313	135	0.68438	0.72479	0.875
	Lysotracker	Distal	Nocodazole	Ctrl	Ctrl D1 Lyso Noco.tif Lyso.csv	2.16418	2.24633	1.1449	1.80957	0.80557	164.563	0.52395	291.95	100	5610	74.825	78.0188	161.565	1.10734	0.44517	0.63768
	Lysotracker	Distal	Nocodazole	Ctrl	Ctrl D1 Lyso Noco.tif Lyso.csv	1.96241	1.12037	2.13368	1.74462	1.55718	40.1812	0.92849	544.089	100	10455	85.3188	79.1594	35.5377	1.59688	0.89256	0.87234
	Lysotracker	Distal	Nocodazole	Ctrl	Ctrl D1 Lyso Noco.tif Lyso.csv	0.82252	2	0.20816	0.72807	0.36403	108.435	0.85737	53.0819	100	1020	74.1406	78.475	123.69	0.45625	0.5	0.8
	Lysotracker	Distal	Nocodazole	Ctrl	Ctrl D1 Lyso Noco.tif Lyso.csv	0.82252	2.70203	0.15612	0.73288	0.27123	28.155	0.75398	39.8114	100	765	73.9125	79.8438	33.6901	0.40831	0.37009	0.66667
	Lysotracker	Distal	Nocodazole	Ctrl	Ctrl D1 Lyso Noco.tif Lyso.csv	1.16321	1.67003	0.41633	0.94088	0.56339	90	0.56715	106.164	100	2040	77.5625	79.3875	101.31	0.68438	0.59879	0.72727
	Lysotracker	Distal	Nocodazole	Ctrl	Ctrl D1 Lyso Noco.tif Lyso.csv	1.46071	1.95765	0.46837	1.08048	0.55193	140.83	0.5854	119.434	100	2295	75.0531	80.7563	141.34	0.80654	0.51082	0.66667
	Lysotracker	Distal	Nocodazole	Ctrl	Ctrl D1 Lyso Noco.tif Lyso.csv	1.02021	1.1852	0.46837	0.84071	0.70934	172.372	1	119.434	100	2295	48.8188	82.5813	153.435	0.68438	0.84374	0.85714
	Lysotracker	Distal	Nocodazole	Ctrl	Ctrl D2 Lyso Noco.tif Lyso.csv	1.78171	1.08384	1.7694	1.56261	1.44173	161.565	0.99444	451.196	100	8670	115.659	25.0938	129.806	1.36875	0.92264	0.91892
	Lysotracker	Distal	Nocodazole	Ctrl	Ctrl D2 Lyso Noco.tif Lyso.csv	1.66078	1.54417	1.24898	1.56704	1.01481	4.45746	0.91631	318.491	100	6120	94.9	26.0063	164.055	1.14063	0.6476	0.84211
	Lysotracker	Distal	Nocodazole	Ctrl	Ctrl D2 Lyso Noco.tif Lyso.csv	1.14063	1.09923	0.57245	0.89509	0.81429	54.9915	0.97622	145.975	100	2805	86.6875	27.375	36.8699	0.9125	0.90973	0.84615
	Lysotracker	Distal	Nocodazole	Ctrl	Ctrl D2 Lyso Noco.tif Lyso.csv	0.64524	1.46385	0.15612	0.53943	0.3685	135	1	39.8114	100	765	85.0906	27.375	135	0.45625	0.68313	0.85714
	Lysotracker	Distal	Nocodazole	Ctrl	Ctrl D2 Lyso Noco.tif Lyso.csv	2.425	2.50863	1.56123	2.23309	0.89016	127.322	0.57721	398.114	100	7650	53.8375	27.8313	131.186	1.3187	0.39862	0.67416
	Lysotracker	Distal	Nocodazole	Ctrl	Ctrl D2 Lyso Noco.tif Lyso.csv	1.22849	1.16363	0.72857	1.03896	0.89286	98.0823	0.99252	185.786	100	3570	20.7594	29.4281	68.1986	0.9125	0.85938	0.82353
	Lysotracker	Distal	Nocodazole	Ctrl	Ctrl D2 Lyso Noco.tif Lyso.csv	1.29047	1.23943	0.62449	0.99273	0.80095	84.6902	0.41902	159.246	100	3060	46.7656	29.4281	45	1.12257	0.80682	0.61538
	Lysotracker	Distal	Nocodazole	Ctrl	Ctrl D2 Lyso Noco.tif Lyso.csv	0.64524	1.46385	0.15612	0.53943	0.3685	45	1	39.8114	100	765	61.1375	28.9719	45	0.45625	0.68313	0.85714
	Lysotracker	Distal	Nocodazole	Ctrl	Ctrl D2 Lyso Noco.tif Lyso.csv	1.78171	1.20279	1.30103	1.41154	1.17356	127.542	0.75603	331.762	100	6375	72.0875	29.2	129.806	1.29047	0.8314	0.79365
	Lysotracker	Distal	Nocodazole	Ctrl	Ctrl D2 Lyso Noco.tif Lyso.csv	0.64524	1.46385	0.15612	0.53943	0.3685	45	1	39.8114	100	765	14.6	29.6562	45	0.45625	0.68313	0.85714
	Lysotracker	Distal	Nocodazole	Ctrl	Ctrl D2 Lyso Noco.tif Lyso.csv	4.20642	1.47253	7.44187	3.73532	2.53667	13.276	0.67496	1897.68	100	36465	37.4125	31.4812	12.5288	2.8753	0.6791	0.81481
	Lysotracker	Distal	Nocodazole	Ctrl	Ctrl D2 Lyso Noco.tif Lyso.csv	1.73735	1.25802	1.35307	1.47217	1.17023	13.7177	0.99267	345.032	100	6630	15.0563	30.3406	23.1986	1.14063	0.7949	0.86667
	Lysotracker	Distal	Nocodazole	Ctrl	Ctrl D2 Lyso Noco.tif Lyso.csv	0.82252	1.1239	0.31225	0.66845	0.59476	116.565	0.91631	79.6228	100	1530	24.1812	29.4281	123.69	0.68438	0.88976	0.8
	Lysotracker	Distal	Nocodazole	Ctrl	Ctrl D2 Lyso Noco.tif Lyso.csv	1.02021	1.93571	0.36429	0.94754	0.48951	8.34962	1	92.8932	100	1785	20.075	30.1125	26.565	0.45625	0.51661	0.93333
	Lysotracker	Distal	Nocodazole	Ctrl	Ctrl D2 Lyso Noco.tif Lyso.csv	0.64524	1.46385	0.15612	0.53943	0.3685	45	1	39.8114	100	765	49.5031	30.3406	45	0.45625	0.68313	0.85714
	Lysotracker	Distal	Nocodazole	Ctrl	Ctrl D2 Lyso Noco.tif Lyso.csv	0.72139	1.4676	0.20816	0.62368	0.42497	0	1	53.0819	100	1020	98.55	29.8844	161.565	0.45625	0.68139	0.8
	Lysotracker	Distal	Nocodazole	Ctrl	Ctrl D2 Lyso Noco.tif Lyso.csv	1.02021	1.55368	0.41633	0.90751	0.58411	24.407	1	106.164	100	2040	109.272	30.5688	26.565	0.68438	0.64363	0.8
	Lysotracker	Distal	Nocodazole	Ctrl	Ctrl D2 Lyso Noco.tif Lyso.csv	1.33019	1.36861	0.78062	1.16631	0.85219	102.323	0.97567	199.057	100	3825	101.288	31.2531	120.964	0.9125	0.73067	0.85714
	Lysotracker	Distal	Nocodazole	Ctrl	Ctrl D2 Lyso Noco.tif Lyso.csv	1.22849	1.26374	0.72857	1.08273	0.85677	24.3576	0.99252	185.786	100	3570	2.05313	32.3937	21.8014	0.9125	0.7913	0.84848
	Lysotracker	Distal	Nocodazole	Ctrl	Ctrl D2 Lyso Noco.tif Lyso.csv	1.46071	1.19325	0.98878	1.22566	1.02716	139.415	0.91631	252.139	100	4845	32.3937	31.9375	141.34	1.12916	0.83805	0.80851
	Lysotracker	Distal	Nocodazole	Ctrl	Ctrl D2 Lyso Noco.tif Lyso.csv	0.64524	1	0.20816	0.51482	0.51482	0	1	53.0819	100	1020	15.5125	32.6219	135	0.45625	1	1
	Lysotracker	Distal	Nocodazole	Ctrl	Ctrl D2 Lyso Noco.tif Lyso.csv	1.33019	1.12958	0.93674	1.16071	1.02756	64.5938	1	238.868	100	4590	18.25	34.2188	59.0362	1.12916	0.88529	0.85714
	Lysotracker	Distal	Nocodazole	Ctrl	Ctrl D2 Lyso Noco.tif Lyso.csv	3.48964	1.54564	4.78777	3.06956	1.98595	164.764	0.48607	1220.88	100	23460	100.375	81.8969	168.69	2.4493	0.64698	0.7541
	Lysotracker	Distal	Nocodazole	Ctrl	Ctrl D2 Lyso Noco.tif Lyso.csv	1.78171	1.12053	1.82144	1.61203	1.43864	13.6619	0.94651	464.466	100	8925	59.7688	84.1781	39.8056	1.59688	0.89244	0.8642
	Lysotracker	Distal	Nocodazole	Ctrl	Ctrl D2 Lyso Noco.tif Lyso.csv	2.97439	1.43414	3.74695	2.61571	1.82389	32.2067	0.76975	955.473	100	18360	109.272	85.3188	32.4712	1.93571	0.69728	0.84706
	Lysotracker	Distal	Nocodazole	Ctrl	Ctrl D2 Lyso Noco.tif Lyso.csv	1.44279	1.1825	1.09286	1.28274	1.08477	11.3099	1	278.68	100	5355	66.8406	83.95	161.565	1.14063	0.84566	0.85714
	Lysotracker	Distal	Nocodazole	Ctrl	Ctrl D2 Lyso Noco.tif Lyso.csv	2.16418	2.24895	1.66531	2.1837	0.97099	2.2064	0.77847	424.655	100	8160	71.175	84.6344	18.435	0.9125	0.44465	0.92754
	Lysotracker	Distal	Nocodazole	Ctrl	Ctrl D2 Lyso Noco.tif Lyso.csv	0.96785	2.30821	0.26021	0.87448	0.37886	45	0.87266	66.3523	100	1275	31.4812	84.8625	45	0.48393	0.43324	0.76923
	Lysotracker	Distal	Nocodazole	Ctrl	Ctrl D2 Lyso Noco.tif Lyso.csv	1.02021	1.02791	0.52041	0.82529	0.80288	116.565	0.98175	132.705	100	2550	56.575	84.4063	116.565	0.9125	0.97285	0.76923
	Lysotracker	Distal	Nocodazole	Ctrl	Ctrl D2 Lyso Noco.tif Lyso.csv	0.64524	1.46385	0.15612	0.53943	0.3685	135	1	39.8114	100	765	114.975	84.4063	135	0.45625	0.68313	0.85714
	Lysotracker	Distal	Nocodazole	Ctrl	Ctrl D2 Lyso Noco.tif Lyso.csv	0.82252	1.06885	0.36429	0.7041	0.65875	0	1	92.8932	100	1785	82.8094	84.6344	123.69	0.68438	0.93559	0.875
	Lysotracker	Distal	Nocodazole	Ctrl	Ctrl D2 Lyso Noco.tif Lyso.csv	3.17741	1.58041	4.57961	3.03566	1.92081	162.54	0.92226	1167.8	100	22440	11.6344	85.5469	158.962	2.05313	0.63275	0.91192
	Lysotracker	Distal	Nocodazole	Ctrl	Ctrl D2 Lyso Noco.tif Lyso.csv	1.96241	1.08845	2.13368	1.71958	1.57985	29.4359	1	544.089	100	10455	78.2469	86.4594	35.5377	1.59688	0.91874	0.92135
	Lysotracker	Distal	Nocodazole	Ctrl	Ctrl D2 Lyso Noco.tif Lyso.csv	0.72139	3	0.15612	0.77223	0.25741	90	0.80852	39.8114	100	765	52.6969	85.775	108.435	0.22813	0.33333	1
	Lysotracker	Distal	Nocodazole	Ctrl	Ctrl D2 Lyso Noco.tif Lyso.csv	0.72139	1	0.26021	0.57559	0.57559	0	0.87266	66.3523	100	1275	10.95	86.9156	108.435	0.64524	1	0.71429
	Lysotracker	Distal	Nocodazole	Ctrl	Ctrl D2 Lyso Noco.tif Lyso.csv	0.82252	1.51729	0.20816	0.63415	0.41795	55.278	0.51291	53.0819	100	1020	49.7313	88.2844	33.6901	0.61247	0.65907	0.57143
	Lysotracker	Distal	Nocodazole	Ctrl	Ctrl D2 Lyso Noco.tif Lyso.csv	1.14063	1.37205	0.57245	1.00002	0.72885	15.0707	1	145.975	100	2805	14.1438	88.7406	36.8699	0.68438	0.72883	0.95652
	Lysotracker	Distal	Nocodazole	Ctrl	Ctrl D3 Lyso Noco.tif Lyso.csv	1.14063	1.18658	0.62449	0.97133	0.8186	136.533	1	159.246	100	3060	115.888	27.8313	126.87	0.9125	0.84276	0.82759
	Lysotracker	Distal	Nocodazole	Ctrl	Ctrl D3 Lyso Noco.tif Lyso.csv	1.22849	1.31218	0.67653	1.06315	0.81022	168.69	1	172.516	100	3315	25.3219	30.5688	158.199	0.9125	0.76209	0.8125
	Lysotracker	Distal	Nocodazole	Ctrl	Ctrl D3 Lyso Noco.tif Lyso.csv	1.33019	1.64551	0.52041	1.04419	0.63457	25.3872	0.53586	132.705	100	2550	53.3813	39.9219	30.9638	0.86616	0.60771	0.64516
	Lysotracker	Distal	Nocodazole	Ctrl	Ctrl D3 Lyso Noco.tif Lyso.csv	0.82252	1.49607	0.26021	0.70403	0.47058	34.0993	0.87266	66.3523	100	1275	42.4313	85.0906	33.6901	0.61247	0.66842	0.71429
	Lysotracker	Distal	Nocodazole	Ctrl	Ctrl D3 Lyso Noco.tif Lyso.csv	0.96785	4.1231	0.15612	0.90532	0.21957	45	0.5236	39.8114	100	765	74.825	85.3188	45	0.32262	0.24254	0.6
	Lysotracker	Distal	Nocodazole	Ctrl	Ctrl D3 Lyso Noco.tif Lyso.csv	0.64524	1	0.20816	0.51482	0.51482	0	1	53.0819	100	1020	39.6938	85.0906	135	0.45625	1	1
	Lysotracker	Distal	Nocodazole	Ctrl	Ctrl D3 Lyso Noco.tif Lyso.csv	1.66078	1.3831	1.1449	1.41993	1.02663	26.19	0.89694	291.95	100	5610	24.8656	87.8281	15.9454	1.14063	0.72301	0.78571
	Lysotracker	Distal	Nocodazole	Ctrl	Ctrl D3 Lyso Noco.tif Lyso.csv	0.72139	1.5667	0.15612	0.55806	0.3562	0	0.5236	39.8114	100	765	83.2656	87.6	161.565	0.45625	0.63828	0.6
	Lysotracker	Distal	Nocodazole	Ctrl	Ctrl D3 Lyso Noco.tif Lyso.csv	1.46071	1.96568	0.46837	1.08269	0.5508	37.778	0.43404	119.434	100	2295	96.0406	88.5125	38.6598	0.80654	0.50873	0.6
	Lysotracker	Distal	Nocodazole	Ctrl	Ctrl D3 Lyso Noco.tif Lyso.csv	0.82252	2.03127	0.20816	0.73374	0.36122	31.7175	1	53.0819	100	1020	72.3156	88.7406	33.6901	0.45625	0.4923	0.8
	Lysotracker	Distal	Nocodazole	Ctrl	Ctrl D3 Lyso Noco.tif Lyso.csv	1.53031	1.07333	1.40511	1.38572	1.29105	153.087	1	358.303	100	6885	51.5563	89.425	116.565	1.36875	0.93168	0.88525
	Lysotracker	Distal	Nocodazole	Ctrl	Ctrl D3 Lyso Noco.tif Lyso.csv	1.46071	1.51893	0.72857	1.18703	0.78149	30.6634	0.83846	185.786	100	3570	86.6875	94.4438	38.6598	0.9125	0.65836	0.82353
	Lysotracker	Distal	Nocodazole	Ctrl	Ctrl D4 Lyso Noco.tif Lyso.csv	1.66078	2.26292	0.83266	1.5489	0.68447	177.28	0.67073	212.327	100	4080	15.5125	0	164.055	0.68438	0.44191	0.86486
	Lysotracker	Distal	Nocodazole	Ctrl	Ctrl D4 Lyso Noco.tif Lyso.csv	0.96785	1.44874	0.31225	0.75892	0.52385	65.3007	0.76937	79.6228	100	1530	38.325	11.8625	45	0.68438	0.69026	0.75
	Lysotracker	Distal	Nocodazole	Ctrl	Ctrl D4 Lyso Noco.tif Lyso.csv	0.64524	1.46385	0.15612	0.53943	0.3685	135	1	39.8114	100	765	39.2375	11.4062	135	0.45625	0.68313	0.85714
	Lysotracker	Distal	Nocodazole	Ctrl	Ctrl D4 Lyso Noco.tif Lyso.csv	1.02021	1.41576	0.41633	0.8663	0.6119	7.01812	0.91441	106.164	100	2040	73.4563	59.9969	26.565	0.68438	0.70633	0.8
	Lysotracker	Distal	Nocodazole	Ctrl	Ctrl D4 Lyso Noco.tif Lyso.csv	0.94058	1.87136	0.26021	0.78739	0.42076	2.8553	0.64114	66.3523	100	1275	65.7	60.225	165.964	0.45625	0.53437	0.71429
	Lysotracker	Distal	Nocodazole	Ctrl	Ctrl D4 Lyso Noco.tif Lyso.csv	1.46071	1.47761	0.62449	1.08392	0.73357	135	0.57872	159.246	100	3060	88.5125	60.225	141.34	0.9125	0.67677	0.72727
	Lysotracker	Distal	Nocodazole	Ctrl	Ctrl D4 Lyso Noco.tif Lyso.csv	1.53031	1.30288	1.09286	1.34645	1.03344	7.36516	0.80177	278.68	100	5355	57.0313	61.5938	26.565	1.14063	0.76753	0.82353
	Lysotracker	Distal	Nocodazole	Ctrl	Ctrl D4 Lyso Noco.tif Lyso.csv	1.02021	1.6053	0.41633	0.92247	0.57464	160.67	1	106.164	100	2040	13.2312	62.05	153.435	0.68438	0.62294	0.8
	Lysotracker	Distal	Nocodazole	Ctrl	Ctrl D4 Lyso Noco.tif Lyso.csv	0.64524	1.46385	0.15612	0.53943	0.3685	135	1	39.8114	100	765	20.3031	62.2781	135	0.45625	0.68313	0.85714
	Lysotracker	Distal	Nocodazole	Ctrl	Ctrl D4 Lyso Noco.tif Lyso.csv	1.46071	1.13173	1.19694	1.3133	1.16044	159.298	1	305.221	100	5865	40.6063	62.2781	128.66	1.14063	0.88361	0.88462
	Lysotracker	Distal	Nocodazole	Ctrl	Ctrl D4 Lyso Noco.tif Lyso.csv	1.02021	1.43543	0.41633	0.8723	0.60769	17.2961	0.91441	106.164	100	2040	106.534	62.7344	26.565	0.68438	0.69666	0.84211
	Lysotracker	Distal	Nocodazole	Ctrl	Ctrl D4 Lyso Noco.tif Lyso.csv	1.66078	1.85779	0.8847	1.44661	0.77867	175.949	0.64906	225.598	100	4335	38.5531	62.7344	164.055	0.9125	0.53827	0.75556
	Lysotracker	Distal	Nocodazole	Ctrl	Ctrl D4 Lyso Noco.tif Lyso.csv	0.72139	3	0.15612	0.77223	0.25741	0	0.96737	39.8114	100	765	105.166	62.5063	161.565	0.22813	0.33333	1
	Lysotracker	Distal	Nocodazole	Ctrl	Ctrl D4 Lyso Noco.tif Lyso.csv	0.64524	1	0.20816	0.51482	0.51482	0	1	53.0819	100	1020	22.8125	62.7344	135	0.45625	1	1
	Lysotracker	Distal	Nocodazole	Ctrl	Ctrl D4 Lyso Noco.tif Lyso.csv	1.73735	1.33765	1.09286	1.3643	1.01992	172.055	0.4438	278.68	100	5355	28.9719	63.4188	156.801	1.25417	0.74758	0.63636
	Lysotracker	Distal	Nocodazole	Ctrl	Ctrl D4 Lyso Noco.tif Lyso.csv	1.14063	1.21153	0.52041	0.89597	0.73954	25.6701	0.7757	132.705	100	2550	45.625	72.3156	36.8699	0.86616	0.8254	0.74074
	Lysotracker	Distal	Nocodazole	Ctrl	Ctrl D4 Lyso Noco.tif Lyso.csv	1.73735	1.66768	0.98878	1.44898	0.86886	87.3318	0.55571	252.139	100	4845	10.4938	89.1969	66.8014	0.9125	0.59963	0.79167
	Lysotracker	Distal	Nocodazole	Ctrl	Ctrl D4 Lyso Noco.tif Lyso.csv	0.82252	1.29099	0.31225	0.71642	0.55493	45	1	79.6228	100	1530	28.7437	103.569	33.6901	0.64524	0.7746	0.8
	Lysotracker	Distal	Nocodazole	Ctrl	Ctrl D5 Lyso Noco.tif Lyso.csv	1.46071	1.31458	0.57245	0.97885	0.74461	108.127	0.44847	145.975	100	2805	107.447	12.3187	128.66	1.0761	0.7607	0.53659
	Lysotracker	Distal	Nocodazole	Ctrl	Ctrl D5 Lyso Noco.tif Lyso.csv	2.92143	1.44495	3.799	2.64373	1.82963	139.913	0.75444	968.744	100	18615	84.8625	16.8813	128.66	2.04157	0.69206	0.86905
	Lysotracker	Distal	Nocodazole	Ctrl	Ctrl D5 Lyso Noco.tif Lyso.csv	0.64524	1.46385	0.15612	0.53943	0.3685	45	1	39.8114	100	765	12.775	18.4781	45	0.45625	0.68313	0.85714
	Lysotracker	Distal	Nocodazole	Ctrl	Ctrl D5 Lyso Noco.tif Lyso.csv	1.8392	1.94576	1.09286	1.64544	0.84566	179.549	0.7524	278.68	100	5355	61.3656	26.0063	172.875	0.9125	0.51394	0.82353
	Lysotracker	Distal	Nocodazole	Ctrl	Ctrl D5 Lyso Noco.tif Lyso.csv	0.72139	1.5667	0.15612	0.55806	0.3562	0	0.5236	39.8114	100	765	60.4531	26.0063	161.565	0.45625	0.63828	0.6
	Lysotracker	Distal	Nocodazole	Ctrl	Ctrl D5 Lyso Noco.tif Lyso.csv	1.46071	2.33381	0.46837	1.17973	0.50549	143.271	0.43404	119.434	100	2295	73	25.7781	128.66	0.80654	0.42848	0.52941
	Lysotracker	Distal	Nocodazole	Ctrl	Ctrl D5 Lyso Noco.tif Lyso.csv	0.72139	1.4676	0.20816	0.62368	0.42497	0	1	53.0819	100	1020	39.9219	26.0063	161.565	0.45625	0.68139	0.8
	Lysotracker	Distal	Nocodazole	Ctrl	Ctrl D5 Lyso Noco.tif Lyso.csv	0.82252	2.70203	0.15612	0.73288	0.27123	28.155	0.75398	39.8114	100	765	71.175	26.4625	33.6901	0.40831	0.37009	0.66667
	Lysotracker	Distal	Nocodazole	Ctrl	Ctrl D5 Lyso Noco.tif Lyso.csv	2.3817	1.23251	3.12246	2.2136	1.79601	34.8883	0.92002	796.228	100	15300	69.1219	68.2094	16.6992	1.93571	0.81135	0.87591
	Lysotracker	Distal	Nocodazole	Ctrl	Ctrl D5 Lyso Noco.tif Lyso.csv	3.32155	1.29471	5.15206	2.91428	2.25092	26.1239	0.66185	1313.78	100	25245	12.5469	72.5438	164.055	2.43762	0.77237	0.81818
	Lysotracker	Distal	Nocodazole	Ctrl	Ctrl D5 Lyso Noco.tif Lyso.csv	1.22849	2.14397	0.36429	0.99721	0.46512	14.5273	0.54299	92.8932	100	1785	109.5	82.125	21.8014	0.66405	0.46642	0.58333
	Lysotracker	Distal	Nocodazole	Ctrl	Ctrl D5 Lyso Noco.tif Lyso.csv	3.10284	1.62418	3.64287	2.7447	1.6899	125.607	0.64708	928.932	100	17850	93.9875	83.0375	143.973	1.83525	0.6157	0.83333
	Lysotracker	Distal	Nocodazole	Ctrl	Ctrl D5 Lyso Noco.tif Lyso.csv	0.82252	2.70203	0.15612	0.73288	0.27123	118.155	0.64303	39.8114	100	765	86.4594	83.0375	123.69	0.40831	0.37009	0.66667
	Lysotracker	Distal	Nocodazole	Ctrl	Ctrl D5 Lyso Noco.tif Lyso.csv	0.96785	2.18816	0.26021	0.85144	0.38911	58.2825	0.87266	66.3523	100	1275	75.9656	84.4063	45	0.51068	0.45701	0.71429
	Lysotracker	Distal	Nocodazole	Ctrl	Ctrl D5 Lyso Noco.tif Lyso.csv	1.88117	1.98695	0.83266	1.45138	0.73046	0.34052	0.40126	212.327	100	4080	65.4719	84.6344	14.0362	0.9125	0.50328	0.62745
	Lysotracker	Distal	Nocodazole	Ctrl	Ctrl D5 Lyso Noco.tif Lyso.csv	1.29047	1.38708	0.62449	1.0502	0.75712	58.5253	0.85073	159.246	100	3060	4.10625	86.4594	45	0.9125	0.72094	0.77419
	Lysotracker	Distal	Nocodazole	Ctrl	Ctrl D5 Lyso Noco.tif Lyso.csv	1.96241	1.30232	1.66531	1.66173	1.27598	15.8797	0.56715	424.655	100	8160	14.3719	90.5656	35.5377	1.49425	0.76786	0.72727
	Lysotracker	Distal	Nocodazole	Ctrl	Ctrl D5 Lyso Noco.tif Lyso.csv	2.32643	1.74628	2.18572	2.2045	1.2624	83.1456	0.75815	557.359	100	10710	84.1781	96.2688	78.6901	1.36875	0.57265	0.84
	Lysotracker	Distal	Oligomycin A	Ctrl	Ctrl D1 Lyso OligoA.tif Lyso.csv	1.44279	1.21167	0.78062	1.0974	0.90569	78.2857	0.67362	199.057	100	3825	111.325	31.4812	108.435	1.12257	0.82531	0.68182
	Lysotracker	Distal	Oligomycin A	Ctrl	Ctrl D1 Lyso OligoA.tif Lyso.csv	1.22849	2.27299	0.31225	0.95061	0.41822	160.032	0.53248	79.6228	100	1530	100.831	31.9375	158.199	0.64983	0.43995	0.57143
	Lysotracker	Distal	Oligomycin A	Ctrl	Ctrl D1 Lyso OligoA.tif Lyso.csv	0.96785	1.8818	0.26021	0.78959	0.41959	45.0001	0.87266	66.3523	100	1275	107.447	32.6219	45	0.61247	0.53141	0.71429
	Lysotracker	Distal	Oligomycin A	Ctrl	Ctrl D1 Lyso OligoA.tif Lyso.csv	0.64524	1.46385	0.15612	0.53943	0.3685	135	1	39.8114	100	765	104.481	32.1656	135	0.45625	0.68313	0.85714
	Lysotracker	Distal	Oligomycin A	Ctrl	Ctrl D1 Lyso OligoA.tif Lyso.csv	1.14063	2.20274	0.31225	0.93581	0.42484	136.95	0.68581	79.6228	100	1530	100.375	32.3937	143.13	0.64524	0.45398	0.66667
	Lysotracker	Distal	Oligomycin A	Ctrl	Ctrl D1 Lyso OligoA.tif Lyso.csv	0.96785	1.8818	0.26021	0.78959	0.41959	135	0.87266	66.3523	100	1275	23.725	32.85	135	0.61247	0.53141	0.71429
	Lysotracker	Distal	Oligomycin A	Ctrl	Ctrl D1 Lyso OligoA.tif Lyso.csv	1.73735	1.65146	1.09286	1.5159	0.91792	14.5273	0.63506	278.68	100	5355	31.7094	33.7625	23.1986	1.14063	0.60553	0.75
	Lysotracker	Distal	Oligomycin A	Ctrl	Ctrl D1 Lyso OligoA.tif Lyso.csv	1.02021	1.05232	0.41633	0.74687	0.70974	160.67	0.56715	106.164	100	2040	83.4938	32.85	116.565	0.9125	0.95028	0.64
	Lysotracker	Distal	Oligomycin A	Ctrl	Ctrl D1 Lyso OligoA.tif Lyso.csv	1.88117	1.61059	1.24898	1.60039	0.99367	3.47008	0.68581	318.491	100	6120	37.6406	33.9906	165.964	1.14063	0.62089	0.78689
	Lysotracker	Distal	Oligomycin A	Ctrl	Ctrl D1 Lyso OligoA.tif Lyso.csv	0.64524	1.46385	0.15612	0.53943	0.3685	135	1	39.8114	100	765	79.6156	33.7625	135	0.45625	0.68313	0.85714
	Lysotracker	Distal	Oligomycin A	Ctrl	Ctrl D1 Lyso OligoA.tif Lyso.csv	1.02021	1.89539	0.36429	0.93762	0.49468	22.5	0.8976	92.8932	100	1785	88.7406	34.4469	26.565	0.61247	0.52759	0.73684
	Lysotracker	Distal	Oligomycin A	Ctrl	Ctrl D1 Lyso OligoA.tif Lyso.csv	0.94058	2.2931	0.20816	0.7796	0.33997	6.62026	0.51291	53.0819	100	1020	41.2906	33.9906	165.964	0.45625	0.43609	0.61538
	Lysotracker	Distal	Oligomycin A	Ctrl	Ctrl D1 Lyso OligoA.tif Lyso.csv	2.29263	2.3116	1.50919	2.10757	0.91174	8.26158	0.59598	384.843	100	7395	86.2313	33.9906	174.289	0.9125	0.4326	0.8169
	Lysotracker	Distal	Oligomycin A	Ctrl	Ctrl D1 Lyso OligoA.tif Lyso.csv	0.82252	1.65286	0.26021	0.74	0.44771	0	0.76359	66.3523	100	1275	42.4313	34.4469	146.31	0.45625	0.60501	0.83333
	Lysotracker	Distal	Oligomycin A	Ctrl	Ctrl D1 Lyso OligoA.tif Lyso.csv	1.38763	1.32904	0.72857	1.11035	0.83546	9.92761	0.72698	185.786	100	3570	63.4188	36.0438	170.538	0.9125	0.75242	0.73684
	Lysotracker	Distal	Oligomycin A	Ctrl	Ctrl D1 Lyso OligoA.tif Lyso.csv	0.96785	1.55322	0.26021	0.71735	0.46185	40.935	0.5715	66.3523	100	1275	1.59688	37.1844	45	0.64524	0.64383	0.71429
	Lysotracker	Distal	Oligomycin A	Ctrl	Ctrl D1 Lyso OligoA.tif Lyso.csv	2.55052	1.03157	3.22654	2.05861	1.9956	29.0705	0.64076	822.769	100	15810	30.5688	37.4125	153.435	2.05313	0.9694	0.775
	Lysotracker	Distal	Oligomycin A	Ctrl	Ctrl D1 Lyso OligoA.tif Lyso.csv	2.10321	1.4301	1.45715	1.62889	1.139	34.6468	0.58014	371.573	100	7140	42.2031	38.7813	49.3987	1.3932	0.69925	0.71795
	Lysotracker	Distal	Oligomycin A	Ctrl	Ctrl D1 Lyso OligoA.tif Lyso.csv	1.22849	1.56301	0.52041	1.01767	0.6511	95.6004	0.65045	132.705	100	2550	17.1094	37.6406	111.801	0.83021	0.63979	0.66667
	Lysotracker	Distal	Oligomycin A	Ctrl	Ctrl D1 Lyso OligoA.tif Lyso.csv	0.82252	1.51729	0.20816	0.63415	0.41795	124.722	0.51291	53.0819	100	1020	35.8156	38.325	123.69	0.61247	0.65907	0.57143
	Lysotracker	Distal	Oligomycin A	Ctrl	Ctrl D1 Lyso OligoA.tif Lyso.csv	0.64524	1.46385	0.15612	0.53943	0.3685	45	1	39.8114	100	765	61.8219	38.7813	45	0.45625	0.68313	0.85714
	Lysotracker	Distal	Oligomycin A	Ctrl	Ctrl D1 Lyso OligoA.tif Lyso.csv	0.94058	1.37051	0.31225	0.73815	0.5386	169.722	0.76937	79.6228	100	1530	52.4688	89.1969	165.964	0.68438	0.72966	0.63158
	Lysotracker	Distal	Oligomycin A	Ctrl	Ctrl D1 Lyso OligoA.tif Lyso.csv	1.53031	1.42526	0.83266	1.22924	0.86246	35.6803	0.83083	212.327	100	4080	97.6375	92.3906	26.565	0.96785	0.70162	0.7619
	Lysotracker	Distal	Oligomycin A	Ctrl	Ctrl D1 Lyso OligoA.tif Lyso.csv	0.72139	3	0.15612	0.77223	0.25741	90	0.80852	39.8114	100	765	20.075	95.8125	108.435	0.22813	0.33333	1
	Lysotracker	Distal	Oligomycin A	Ctrl	Ctrl D2 Lyso OligoA.tif Lyso.csv	2.15213	1.22605	2.39389	1.93313	1.57672	56.8107	0.92707	610.441	100	11730	84.8625	28.0594	57.9946	1.73504	0.81563	0.87619
	Lysotracker	Distal	Oligomycin A	Ctrl	Ctrl D2 Lyso OligoA.tif Lyso.csv	1.02021	1.13876	0.57245	0.91105	0.80003	18.435	1	145.975	100	2805	88.0563	26.4625	153.435	0.9125	0.87814	0.81481
	Lysotracker	Distal	Oligomycin A	Ctrl	Ctrl D2 Lyso OligoA.tif Lyso.csv	1.53031	1.10263	1.24898	1.32419	1.20093	93.0714	1	318.491	100	6120	68.8938	26.4625	116.565	1.14063	0.90692	0.90566
	Lysotracker	Distal	Oligomycin A	Ctrl	Ctrl D2 Lyso OligoA.tif Lyso.csv	1.02021	1.55954	0.36429	0.8505	0.54535	172.628	0.5643	92.8932	100	1785	26.2344	27.8313	153.435	0.68438	0.64121	0.7
	Lysotracker	Distal	Oligomycin A	Ctrl	Ctrl D2 Lyso OligoA.tif Lyso.csv	1.02021	1.23565	0.52041	0.90485	0.73229	90	1	132.705	100	2550	31.025	28.0594	116.565	0.68438	0.80929	0.90909
	Lysotracker	Distal	Oligomycin A	Ctrl	Ctrl D2 Lyso OligoA.tif Lyso.csv	1.14063	1.2852	0.52041	0.92281	0.71803	109.903	0.80615	132.705	100	2550	37.1844	28.5156	126.87	0.68438	0.77809	0.86957
	Lysotracker	Distal	Oligomycin A	Ctrl	Ctrl D2 Lyso OligoA.tif Lyso.csv	1.46071	1.61737	0.67653	1.18033	0.72978	39.215	0.53001	172.516	100	3315	35.8156	29.6562	38.6598	1.0825	0.61829	0.63415
	Lysotracker	Distal	Oligomycin A	Ctrl	Ctrl D2 Lyso OligoA.tif Lyso.csv	2.16418	1.564	1.97756	1.98444	1.26883	175.451	0.76584	504.278	100	9690	54.9781	29.2	161.565	1.51599	0.63939	0.8172
	Lysotracker	Distal	Oligomycin A	Ctrl	Ctrl D2 Lyso OligoA.tif Lyso.csv	2.34869	1.3111	2.86226	2.18588	1.66721	45.0009	0.93328	729.875	100	14025	72.5438	30.7969	29.0546	1.7744	0.76272	0.88
	Lysotracker	Distal	Oligomycin A	Ctrl	Ctrl D2 Lyso OligoA.tif Lyso.csv	0.82252	2	0.20816	0.72807	0.36403	18.435	1	53.0819	100	1020	40.8344	31.025	33.6901	0.45625	0.5	0.8
	Lysotracker	Distal	Oligomycin A	Ctrl	Ctrl D2 Lyso OligoA.tif Lyso.csv	1.8392	1.17894	1.7694	1.62972	1.38236	135.772	0.97156	451.196	100	8670	79.6156	31.025	150.255	1.58343	0.84822	0.85
	Lysotracker	Distal	Oligomycin A	Ctrl	Ctrl D2 Lyso OligoA.tif Lyso.csv	0.72139	1.4676	0.20816	0.62368	0.42497	90	0.85737	53.0819	100	1020	25.0938	30.7969	108.435	0.45625	0.68139	0.8
	Lysotracker	Distal	Oligomycin A	Ctrl	Ctrl D2 Lyso OligoA.tif Lyso.csv	1.53031	1.14339	1.35307	1.4035	1.22749	9.53628	0.90787	345.032	100	6630	19.1625	31.4812	153.435	1.36875	0.87459	0.85246
	Lysotracker	Distal	Oligomycin A	Ctrl	Ctrl D2 Lyso OligoA.tif Lyso.csv	1.33019	2	0.62449	1.26105	0.63053	11.3099	0.88261	159.246	100	3060	21.9	31.7094	30.9638	0.68438	0.5	0.88889
	Lysotracker	Distal	Oligomycin A	Ctrl	Ctrl D2 Lyso OligoA.tif Lyso.csv	1.78171	1.47286	1.35307	1.59292	1.08152	21.9403	0.80533	345.032	100	6630	44.2563	32.1656	39.8056	1.22436	0.67895	0.8
	Lysotracker	Distal	Oligomycin A	Ctrl	Ctrl D2 Lyso OligoA.tif Lyso.csv	1.73735	1.55824	1.19694	1.54102	0.98895	170.744	0.87813	305.221	100	5865	7.52813	31.4812	156.801	1.14063	0.64175	0.80702
	Lysotracker	Distal	Oligomycin A	Ctrl	Ctrl D2 Lyso OligoA.tif Lyso.csv	1.22849	1.86648	0.52041	1.11209	0.59582	173.158	0.88747	132.705	100	2550	31.2531	31.2531	158.199	0.68438	0.53577	0.8
	Lysotracker	Distal	Oligomycin A	Ctrl	Ctrl D2 Lyso OligoA.tif Lyso.csv	0.96785	2.18816	0.26021	0.85144	0.38911	121.717	0.87266	66.3523	100	1275	40.15	31.2531	135	0.51068	0.45701	0.71429
	Lysotracker	Distal	Oligomycin A	Ctrl	Ctrl D2 Lyso OligoA.tif Lyso.csv	0.64524	1.46385	0.15612	0.53943	0.3685	45	1	39.8114	100	765	107.447	31.7094	45	0.45625	0.68313	0.85714
	Lysotracker	Distal	Oligomycin A	Ctrl	Ctrl D2 Lyso OligoA.tif Lyso.csv	0.82252	1.06885	0.36429	0.7041	0.65875	90	1	92.8932	100	1785	18.0219	31.4812	123.69	0.68438	0.93559	0.875
	Lysotracker	Distal	Oligomycin A	Ctrl	Ctrl D2 Lyso OligoA.tif Lyso.csv	1.44279	1.87328	0.83266	1.40926	0.75229	0	0.95824	212.327	100	4080	38.7813	31.4812	161.565	0.68438	0.53382	0.94118
	Lysotracker	Distal	Oligomycin A	Ctrl	Ctrl D2 Lyso OligoA.tif Lyso.csv	2.04041	1.1923	2.13368	1.79976	1.50948	57.1743	0.97645	544.089	100	10455	55.6625	33.3062	63.435	1.59688	0.83871	0.8913
	Lysotracker	Distal	Oligomycin A	Ctrl	Ctrl D2 Lyso OligoA.tif Lyso.csv	0.82252	1.55299	0.26021	0.71729	0.46188	161.565	1	66.3523	100	1275	89.6531	31.4812	146.31	0.45625	0.64392	0.90909
	Lysotracker	Distal	Oligomycin A	Ctrl	Ctrl D2 Lyso OligoA.tif Lyso.csv	0.64524	1.46385	0.15612	0.53943	0.3685	135	1	39.8114	100	765	110.641	31.4812	135	0.45625	0.68313	0.85714
	Lysotracker	Distal	Oligomycin A	Ctrl	Ctrl D2 Lyso OligoA.tif Lyso.csv	1.16321	2.42283	0.36429	1.06008	0.43754	175.692	0.71768	92.8932	100	1785	5.24688	31.9375	168.69	0.45625	0.41274	0.82353
	Lysotracker	Distal	Oligomycin A	Ctrl	Ctrl D2 Lyso OligoA.tif Lyso.csv	1.53031	2.44167	0.67653	1.45025	0.59396	9.74869	0.64623	172.516	100	3315	15.0563	32.3937	26.565	0.68438	0.40956	0.8125
	Lysotracker	Distal	Oligomycin A	Ctrl	Ctrl D2 Lyso OligoA.tif Lyso.csv	0.82252	1.55299	0.26021	0.71729	0.46188	108.435	1	66.3523	100	1275	0	31.9375	123.69	0.45625	0.64392	0.90909
	Lysotracker	Distal	Oligomycin A	Ctrl	Ctrl D2 Lyso OligoA.tif Lyso.csv	2.60103	1.07528	4.00716	2.34226	2.17827	7.21243	0.92836	1021.83	100	19635	69.1219	32.85	164.745	2.25832	0.92999	0.89017
	Lysotracker	Distal	Oligomycin A	Ctrl	Ctrl D2 Lyso OligoA.tif Lyso.csv	1.33019	1.66226	0.72857	1.24177	0.74704	82.8386	1	185.786	100	3570	9.35313	33.5344	59.0362	0.68438	0.60159	0.96552
	Lysotracker	Distal	Oligomycin A	Ctrl	Ctrl D2 Lyso OligoA.tif Lyso.csv	1.16321	1.60955	0.46837	0.97972	0.60869	0	0.79872	119.434	100	2295	11.6344	33.0781	168.69	0.68438	0.62129	0.75
	Lysotracker	Distal	Oligomycin A	Ctrl	Ctrl D2 Lyso OligoA.tif Lyso.csv	1.22849	2.38601	0.46837	1.19285	0.49993	4.73116	0.92273	119.434	100	2295	4.79063	34.2188	21.8014	0.45625	0.41911	0.94737
	Lysotracker	Distal	Oligomycin A	Ctrl	Ctrl D2 Lyso OligoA.tif Lyso.csv	0.64524	1.46385	0.15612	0.53943	0.3685	45	1	39.8114	100	765	35.3594	34.4469	45	0.45625	0.68313	0.85714
	Lysotracker	Distal	Oligomycin A	Ctrl	Ctrl D2 Lyso OligoA.tif Lyso.csv	0.64524	1	0.20816	0.51482	0.51482	0	1	53.0819	100	1020	43.8	85.3188	135	0.45625	1	1
	Lysotracker	Distal	Oligomycin A	Ctrl	Ctrl D2 Lyso OligoA.tif Lyso.csv	2.55052	1.39109	2.81022	2.23102	1.60379	158.025	0.72341	716.605	100	13770	9.80938	89.6531	153.435	1.825	0.71886	0.82443
	Lysotracker	Distal	Oligomycin A	Ctrl	Ctrl D2 Lyso OligoA.tif Lyso.csv	1.46071	1.02723	1.09286	1.19556	1.16387	22.5	0.94307	278.68	100	5355	0.45625	91.4781	38.6598	1.14063	0.97349	0.84
	Lysotracker	Distal	Oligomycin A	Ctrl	Ctrl D2 Lyso OligoA.tif Lyso.csv	1.33019	1.83647	0.57245	1.15696	0.62999	164.46	0.77984	145.975	100	2805	4.79063	90.7938	149.036	0.83021	0.54452	0.73333
	Lysotracker	Distal	Oligomycin A	Ctrl	Ctrl D2 Lyso OligoA.tif Lyso.csv	0.64524	1.46385	0.15612	0.53943	0.3685	135	1	39.8114	100	765	8.89688	90.5656	135	0.45625	0.68313	0.85714
	Lysotracker	Distal	Oligomycin A	Ctrl	Ctrl D3 Lyso OligoA.tif Lyso.csv	0.72139	1	0.26021	0.57559	0.57559	0	0.87266	66.3523	100	1275	24.8656	24.4094	108.435	0.64524	1	0.71429
	Lysotracker	Distal	Oligomycin A	Ctrl	Ctrl D3 Lyso OligoA.tif Lyso.csv	0.72139	1	0.26021	0.57559	0.57559	0	0.87266	66.3523	100	1275	22.3562	24.6375	108.435	0.64524	1	0.71429
	Lysotracker	Distal	Oligomycin A	Ctrl	Ctrl D3 Lyso OligoA.tif Lyso.csv	0.64524	1	0.20816	0.51482	0.51482	0	1	53.0819	100	1020	16.6531	24.8656	135	0.45625	1	1
	Lysotracker	Distal	Oligomycin A	Ctrl	Ctrl D3 Lyso OligoA.tif Lyso.csv	1.22849	2.04124	0.52041	1.16299	0.56975	11.4368	0.88747	132.705	100	2550	10.95	26.2344	21.8014	0.68438	0.4899	0.8
	Lysotracker	Distal	Oligomycin A	Ctrl	Ctrl D3 Lyso OligoA.tif Lyso.csv	1.02021	1.09046	0.52041	0.85003	0.77951	59.8724	0.88747	132.705	100	2550	8.66875	25.7781	116.565	0.9125	0.91705	0.8
	Lysotracker	Distal	Oligomycin A	Ctrl	Ctrl D3 Lyso OligoA.tif Lyso.csv	1.88117	1.24196	1.7694	1.67271	1.34683	166.993	0.87146	451.196	100	8670	27.8313	26.6906	14.0362	1.36875	0.80518	0.86076
	Lysotracker	Distal	Oligomycin A	Ctrl	Ctrl D3 Lyso OligoA.tif Lyso.csv	1.8392	1.01566	1.87348	1.55652	1.53251	166.296	0.92273	477.737	100	9180	60.6813	27.1469	29.7449	1.59688	0.98458	0.86747
	Lysotracker	Distal	Oligomycin A	Ctrl	Ctrl D3 Lyso OligoA.tif Lyso.csv	1.46071	1.36474	0.83266	1.20285	0.88138	146.616	0.92693	212.327	100	4080	56.575	26.4625	128.66	1.01012	0.73274	0.8
	Lysotracker	Distal	Oligomycin A	Ctrl	Ctrl D3 Lyso OligoA.tif Lyso.csv	1.02021	1.41576	0.41633	0.8663	0.6119	82.9819	0.91441	106.164	100	2040	13.0031	27.6031	63.435	0.68438	0.70633	0.8
	Lysotracker	Distal	Oligomycin A	Ctrl	Ctrl D3 Lyso OligoA.tif Lyso.csv	2.24677	2.15933	1.66531	2.13975	0.99093	168.731	0.64492	424.655	100	8160	2.7375	27.375	156.038	1.22843	0.46311	0.7619
	Lysotracker	Distal	Oligomycin A	Ctrl	Ctrl D3 Lyso OligoA.tif Lyso.csv	3.06911	1.68492	3.53879	2.75532	1.63528	146.785	0.71265	902.391	100	17340	5.93125	27.375	131.987	1.89957	0.5935	0.81928
	Lysotracker	Distal	Oligomycin A	Ctrl	Ctrl D3 Lyso OligoA.tif Lyso.csv	1.44279	1.12257	0.98878	1.18881	1.059	18.1922	0.85326	252.139	100	4845	45.1688	27.6031	161.565	1.14063	0.89081	0.79167
	Lysotracker	Distal	Oligomycin A	Ctrl	Ctrl D3 Lyso OligoA.tif Lyso.csv	8.46833	4.61709	12.0735	8.42473	1.82468	179.773	0.40571	3078.75	100	59160	8.44063	28.5156	175.365	2.43004	0.21659	0.78778
	Lysotracker	Distal	Oligomycin A	Ctrl	Ctrl D3 Lyso OligoA.tif Lyso.csv	0.82252	2.70203	0.15612	0.73288	0.27123	151.845	0.75398	39.8114	100	765	0.9125	28.2875	146.31	0.40831	0.37009	0.66667
	Lysotracker	Distal	Oligomycin A	Ctrl	Ctrl D3 Lyso OligoA.tif Lyso.csv	1.33019	1.27569	0.8847	1.19874	0.93968	170.606	1	225.598	100	4335	17.3375	28.2875	149.036	0.9125	0.78389	0.91892
	Lysotracker	Distal	Oligomycin A	Ctrl	Ctrl D3 Lyso OligoA.tif Lyso.csv	0.96785	1.37971	0.36429	0.79997	0.57981	59.5273	1	92.8932	100	1785	2.7375	29.8844	45	0.68438	0.72479	0.875
	Lysotracker	Distal	Oligomycin A	Ctrl	Ctrl D3 Lyso OligoA.tif Lyso.csv	3.48964	2.04853	3.38267	2.97034	1.44999	177.443	0.56442	862.58	100	16575	23.2688	31.9375	11.3099	1.80088	0.48816	0.74713
	Lysotracker	Distal	Oligomycin A	Ctrl	Ctrl D3 Lyso OligoA.tif Lyso.csv	1.46071	1.27325	0.98878	1.26608	0.99437	12.8205	1	252.139	100	4845	7.98438	32.6219	38.6598	0.9125	0.78539	0.97436
	Lysotracker	Distal	Oligomycin A	Ctrl	Ctrl D3 Lyso OligoA.tif Lyso.csv	0.96785	1.22859	0.41633	0.80701	0.65686	135	1	106.164	100	2040	11.1781	31.9375	135	0.68438	0.81394	0.94118
	Lysotracker	Distal	Oligomycin A	Ctrl	Ctrl D3 Lyso OligoA.tif Lyso.csv	0.96785	1.22859	0.41633	0.80701	0.65686	45.0002	1	106.164	100	2040	15.5125	32.6219	45	0.68438	0.81394	0.94118
	Lysotracker	Distal	Oligomycin A	Ctrl	Ctrl D3 Lyso OligoA.tif Lyso.csv	0.64524	1	0.20816	0.51482	0.51482	0	1	53.0819	100	1020	13.2312	32.1656	135	0.45625	1	1
	Lysotracker	Distal	Oligomycin A	Ctrl	Ctrl D3 Lyso OligoA.tif Lyso.csv	1.8392	1.28411	1.82144	1.72569	1.34388	50.5605	1	464.466	100	8925	114.975	80.0719	29.7449	1.45178	0.77875	0.88608
	Lysotracker	Distal	Oligomycin A	Ctrl	Ctrl D3 Lyso OligoA.tif Lyso.csv	1.44279	1.09328	1.09286	1.2334	1.12816	158.669	0.94307	278.68	100	5355	91.9344	79.8438	161.565	1.14063	0.91468	0.85714
	Lysotracker	Distal	Oligomycin A	Ctrl	Ctrl D3 Lyso OligoA.tif Lyso.csv	2.24677	1.08539	2.86226	1.98885	1.83238	101.809	0.95015	729.875	100	14025	95.1281	81.4406	66.0375	1.825	0.92132	0.90164
	Lysotracker	Distal	Oligomycin A	Ctrl	Ctrl D3 Lyso OligoA.tif Lyso.csv	1.14063	1.45045	0.57245	1.0282	0.70888	131.028	1	145.975	100	2805	59.5406	79.8438	126.87	0.80654	0.68944	0.84615
	Lysotracker	Distal	Oligomycin A	Ctrl	Ctrl D3 Lyso OligoA.tif Lyso.csv	2.06576	1.24607	1.97756	1.7713	1.4215	87.2152	0.78733	504.278	100	9690	37.4125	80.0719	96.3402	1.59688	0.80252	0.8
	Lysotracker	Distal	Oligomycin A	Ctrl	Ctrl D3 Lyso OligoA.tif Lyso.csv	1.8392	1.13907	1.87348	1.64837	1.44712	154.228	0.97356	477.737	100	9180	44.7125	80.3	150.255	1.59688	0.87791	0.86747
	Lysotracker	Distal	Oligomycin A	Ctrl	Ctrl D3 Lyso OligoA.tif Lyso.csv	1.46071	1.13173	1.19694	1.3133	1.16044	159.298	1	305.221	100	5865	68.6656	80.0719	128.66	1.14063	0.88361	0.88462
	Lysotracker	Distal	Oligomycin A	Ctrl	Ctrl D3 Lyso OligoA.tif Lyso.csv	0.82252	1.55299	0.26021	0.71729	0.46188	161.565	1	66.3523	100	1275	21.2156	80.7563	146.31	0.45625	0.64392	0.90909
	Lysotracker	Distal	Oligomycin A	Ctrl	Ctrl D3 Lyso OligoA.tif Lyso.csv	1.96241	1.46897	1.66531	1.76486	1.20142	15.7222	0.72468	424.655	100	8160	2.50938	82.125	35.5377	1.36875	0.68075	0.83117
	Lysotracker	Distal	Oligomycin A	Ctrl	Ctrl D3 Lyso OligoA.tif Lyso.csv	1.22849	1.29482	0.78062	1.13443	0.87613	80.5377	1	199.057	100	3825	53.8375	80.9844	111.801	0.9125	0.77231	0.85714
	Lysotracker	Distal	Oligomycin A	Ctrl	Ctrl D3 Lyso OligoA.tif Lyso.csv	1.22849	1.57418	0.52041	1.02131	0.64878	5.71059	0.65045	132.705	100	2550	16.8813	81.4406	158.199	0.68438	0.63525	0.76923
	Lysotracker	Distal	Oligomycin A	Ctrl	Ctrl D3 Lyso OligoA.tif Lyso.csv	2.67014	1.85822	2.65409	2.50589	1.34854	158.578	0.78202	676.794	100	13005	23.2688	81.4406	160.017	1.59688	0.53815	0.82927
	Lysotracker	Distal	Oligomycin A	Ctrl	Ctrl D3 Lyso OligoA.tif Lyso.csv	0.64524	1.46385	0.15612	0.53943	0.3685	135	1	39.8114	100	765	20.9875	81.8969	135	0.45625	0.68313	0.85714
	Lysotracker	Distal	Oligomycin A	Ctrl	Ctrl D3 Lyso OligoA.tif Lyso.csv	1.02021	1.32727	0.52041	0.9378	0.70656	90	1	132.705	100	2550	44.4844	82.8094	116.565	0.68438	0.75342	0.90909
	Lysotracker	Distal	Oligomycin A	Ctrl	Ctrl D3 Lyso OligoA.tif Lyso.csv	1.44279	1.93115	0.83266	1.43085	0.74094	0	0.95824	212.327	100	4080	93.9875	84.1781	161.565	0.68438	0.51783	0.94118
	Lysotracker	Distal	Oligomycin A	Ctrl	Ctrl D3 Lyso OligoA.tif Lyso.csv	0.72139	1	0.26021	0.57559	0.57559	0	0.87266	66.3523	100	1275	111.781	86.0031	108.435	0.64524	1	0.71429
	Lysotracker	Distal	Oligomycin A	Ctrl	Ctrl D3 Lyso OligoA.tif Lyso.csv	5.55052	3.09167	8.01432	5.61675	1.81674	1.42576	0.55382	2043.65	100	39270	15.0563	87.3719	170.538	2.05313	0.32345	0.86034
	Lysotracker	Distal	Oligomycin A	Ctrl	Ctrl D3 Lyso OligoA.tif Lyso.csv	1.78171	1.25715	1.40511	1.4997	1.19293	164.46	0.59904	358.303	100	6885	10.0375	87.3719	140.194	1.36875	0.79545	0.77143
	Lysotracker	Distal	Oligomycin A	Ctrl	Ctrl D3 Lyso OligoA.tif Lyso.csv	1.8392	1.38702	1.24898	1.48517	1.07076	17.7607	0.64904	318.491	100	6120	13.0031	88.0563	29.7449	1.14063	0.72097	0.8
	Lysotracker	Distal	Oligomycin A	Ctrl	Ctrl D3 Lyso OligoA.tif Lyso.csv	1.02021	1.38403	0.52041	0.95764	0.69192	180	1	132.705	100	2550	26.0063	87.8281	153.435	0.68438	0.72253	0.90909
	Lysotracker	Distal	Oligomycin A	Ctrl	Ctrl D3 Lyso OligoA.tif Lyso.csv	0.64524	1.46385	0.15612	0.53943	0.3685	45	1	39.8114	100	765	11.8625	88.2844	45	0.45625	0.68313	0.85714
	Lysotracker	Distal	Oligomycin A	Ctrl	Ctrl D4 Lyso OligoA.tif Lyso.csv	1.14063	1.3307	0.57245	0.98484	0.74009	51.1002	0.77984	145.975	100	2805	72.0875	24.4094	36.8699	0.9125	0.75149	0.78571
	Lysotracker	Distal	Oligomycin A	Ctrl	Ctrl D4 Lyso OligoA.tif Lyso.csv	1.22849	1.43695	0.72857	1.15455	0.80347	7.9279	0.99252	185.786	100	3570	81.2125	24.8656	158.199	0.9125	0.69592	0.82353
	Lysotracker	Distal	Oligomycin A	Ctrl	Ctrl D4 Lyso OligoA.tif Lyso.csv	1.53031	1.51325	0.83266	1.26661	0.83701	73.4416	0.61088	212.327	100	4080	0.22813	27.6031	63.435	1.12257	0.66083	0.68085
	Lysotracker	Distal	Oligomycin A	Ctrl	Ctrl D4 Lyso OligoA.tif Lyso.csv	2.16418	1.11849	2.81022	2.00051	1.78858	76.7664	0.91631	716.605	100	13770	4.5625	27.6031	108.435	1.93862	0.89406	0.85714
	Lysotracker	Distal	Oligomycin A	Ctrl	Ctrl D4 Lyso OligoA.tif Lyso.csv	2.10321	1.71091	1.61327	1.87466	1.09571	0.5748	0.6128	411.384	100	7905	19.1625	29.2	12.5288	1.36875	0.58449	0.7561
	Lysotracker	Distal	Oligomycin A	Ctrl	Ctrl D4 Lyso OligoA.tif Lyso.csv	1.16321	1.52397	0.46837	0.95332	0.62555	164.086	0.69813	119.434	100	2295	17.1094	28.9719	168.69	0.68438	0.65618	0.75
	Lysotracker	Distal	Oligomycin A	Ctrl	Ctrl D4 Lyso OligoA.tif Lyso.csv	1.02021	1.63299	0.31225	0.80574	0.49341	153.435	0.58905	79.6228	100	1530	11.6344	28.7437	153.435	0.64524	0.61237	0.66667
	Lysotracker	Distal	Oligomycin A	Ctrl	Ctrl D4 Lyso OligoA.tif Lyso.csv	2.16418	1.90895	1.24898	1.74233	0.91272	169.667	0.47442	318.491	100	6120	29.8844	28.9719	161.565	1.14063	0.52385	0.68571
	Lysotracker	Distal	Oligomycin A	Ctrl	Ctrl D4 Lyso OligoA.tif Lyso.csv	2.3817	1.6612	2.44593	2.27451	1.3692	163.721	0.8484	623.712	100	11985	36.2719	28.9719	163.301	1.49425	0.60197	0.84685
	Lysotracker	Distal	Oligomycin A	Ctrl	Ctrl D4 Lyso OligoA.tif Lyso.csv	2.82175	1.81645	3.07042	2.66481	1.46704	177.313	0.79039	782.957	100	15045	71.175	30.1125	14.0362	1.72558	0.55052	0.84286
	Lysotracker	Distal	Oligomycin A	Ctrl	Ctrl D4 Lyso OligoA.tif Lyso.csv	0.64524	1.46385	0.15612	0.53943	0.3685	45	1	39.8114	100	765	113.378	29.4281	45	0.45625	0.68313	0.85714
	Lysotracker	Distal	Oligomycin A	Ctrl	Ctrl D4 Lyso OligoA.tif Lyso.csv	1.66078	1.34882	1.40511	1.55341	1.15168	166.952	1	358.303	100	6885	59.3125	29.6562	164.055	1.14063	0.74139	0.88525
	Lysotracker	Distal	Oligomycin A	Ctrl	Ctrl D4 Lyso OligoA.tif Lyso.csv	1.14063	1.13493	0.62449	0.94995	0.83702	70.1947	1	159.246	100	3060	89.6531	30.1125	53.1301	0.9125	0.88111	0.85714
	Lysotracker	Distal	Oligomycin A	Ctrl	Ctrl D4 Lyso OligoA.tif Lyso.csv	0.64524	1.46385	0.15612	0.53943	0.3685	45	1	39.8114	100	765	78.2469	29.8844	45	0.45625	0.68313	0.85714
	Lysotracker	Distal	Oligomycin A	Ctrl	Ctrl D4 Lyso OligoA.tif Lyso.csv	0.94058	1.38707	0.36429	0.8021	0.57827	169.099	0.8976	92.8932	100	1785	13.2312	30.5688	165.964	0.68438	0.72094	0.73684
	Lysotracker	Distal	Oligomycin A	Ctrl	Ctrl D4 Lyso OligoA.tif Lyso.csv	1.78171	1.14268	1.7694	1.60446	1.40412	156.038	0.99444	451.196	100	8670	15.0563	81.2125	129.806	1.36875	0.87514	0.90667
	Lysotracker	Distal	Oligomycin A	Ctrl	Ctrl D4 Lyso OligoA.tif Lyso.csv	1.14063	1.30818	0.41633	0.83274	0.63656	57.4524	0.56715	106.164	100	2040	48.1344	83.2656	53.1301	0.80654	0.76442	0.66667
	Lysotracker	Distal	Oligomycin A	Ctrl	Ctrl D4 Lyso OligoA.tif Lyso.csv	1.29047	1.60751	0.41633	0.9231	0.57424	41.879	0.50265	106.164	100	2040	32.1656	83.4938	45	0.80654	0.62208	0.69565
	Lysotracker	Distal	Oligomycin A	Ctrl	Ctrl D4 Lyso OligoA.tif Lyso.csv	1.46071	1.1418	1.04082	1.23009	1.07733	159.872	0.9942	265.409	100	5100	89.425	83.4938	141.34	1.14063	0.87581	0.90909
	Lysotracker	Distal	Oligomycin A	Ctrl	Ctrl D4 Lyso OligoA.tif Lyso.csv	0.64524	1	0.20816	0.51482	0.51482	0	1	53.0819	100	1020	61.3656	83.7219	135	0.45625	1	1
	Lysotracker	Distal	Oligomycin A	Ctrl	Ctrl D4 Lyso OligoA.tif Lyso.csv	1.33019	1.13839	0.8847	1.1324	0.99473	42.8818	0.98486	225.598	100	4335	22.8125	85.0906	59.0362	1.12257	0.87843	0.82927
	Lysotracker	Distal	Oligomycin A	Ctrl	Ctrl D4 Lyso OligoA.tif Lyso.csv	1.14063	1.2852	0.52041	0.92281	0.71803	160.097	0.80615	132.705	100	2550	24.8656	83.95	143.13	0.68438	0.77809	0.86957
	Lysotracker	Distal	Oligomycin A	Ctrl	Ctrl D4 Lyso OligoA.tif Lyso.csv	1.14063	1.41006	0.52041	0.9666	0.6855	4.54514	0.5989	132.705	100	2550	59.5406	83.95	143.13	0.68438	0.70919	0.83333
	Lysotracker	Distal	Oligomycin A	Ctrl	Ctrl D4 Lyso OligoA.tif Lyso.csv	0.82252	1.29099	0.31225	0.71642	0.55493	135	1	79.6228	100	1530	26.0063	84.1781	123.69	0.64524	0.7746	0.8
	Lysotracker	Distal	Oligomycin A	Ctrl	Ctrl D4 Lyso OligoA.tif Lyso.csv	2.16418	1.21572	1.66531	1.60553	1.32065	86.07	0.60416	424.655	100	8160	31.4812	86.2313	71.565	1.59688	0.82256	0.7191
	Lysotracker	Distal	Oligomycin A	Ctrl	Ctrl D4 Lyso OligoA.tif Lyso.csv	2.92143	2.14449	2.44593	2.58428	1.20508	37.1658	0.44267	623.712	100	11985	49.275	86.9156	51.3402	1.60425	0.46631	0.65278
	Lysotracker	Distal	Oligomycin A	Ctrl	Ctrl D4 Lyso OligoA.tif Lyso.csv	1.33019	1.1872	0.83266	1.12189	0.94499	147.452	0.92693	212.327	100	4080	68.8938	84.6344	120.964	1.0825	0.84232	0.8
	Lysotracker	Distal	Oligomycin A	Ctrl	Ctrl D4 Lyso OligoA.tif Lyso.csv	0.82252	1.5	0.31225	0.77223	0.51482	90	1	79.6228	100	1530	26.9187	84.8625	123.69	0.45625	0.66667	1
	Lysotracker	Distal	Oligomycin A	Ctrl	Ctrl D4 Lyso OligoA.tif Lyso.csv	2.04041	1.63091	1.61327	1.83031	1.12226	32.2892	0.77744	411.384	100	7905	70.7188	86.0031	26.565	1.26676	0.61315	0.80519
	Lysotracker	Distal	Oligomycin A	Ctrl	Ctrl D4 Lyso OligoA.tif Lyso.csv	0.82252	1.29099	0.31225	0.71642	0.55493	45	1	79.6228	100	1530	115.659	85.775	33.6901	0.64524	0.7746	0.8
	Lysotracker	Distal	Oligomycin A	Ctrl	Ctrl D4 Lyso OligoA.tif Lyso.csv	0.96785	1.22859	0.41633	0.80701	0.65686	45.0002	1	106.164	100	2040	80.0719	86.0031	45	0.68438	0.81394	0.94118
	Lysotracker	Distal	Oligomycin A	Ctrl	Ctrl D4 Lyso OligoA.tif Lyso.csv	0.82252	1.55299	0.26021	0.71729	0.46188	161.565	1	66.3523	100	1275	102.428	85.3188	146.31	0.45625	0.64392	0.90909
	Lysotracker	Distal	Oligomycin A	Ctrl	Ctrl D5 Lyso OligoA.tif Lyso.csv	5.63427	2.76512	7.8582	5.25986	1.90221	11.09	0.4165	2003.84	100	38505	18.9344	22.3562	21.3706	2.46642	0.36165	0.72596
	Lysotracker	Distal	Oligomycin A	Ctrl	Ctrl D5 Lyso OligoA.tif Lyso.csv	2.45698	1.46113	2.96634	2.34914	1.60776	98.0946	0.88902	756.416	100	14535	17.5656	77.7906	111.801	1.80471	0.6844	0.87023
	Lysotracker	Distal	Oligomycin A	Ctrl	Ctrl D5 Lyso OligoA.tif Lyso.csv	5.17195	2.38443	7.59799	4.80283	2.01424	115.788	0.49681	1937.49	100	37230	37.4125	79.1594	131.424	2.65346	0.41939	0.71046
	Lysotracker	Distal	Oligomycin A	Ctrl	Ctrl D5 Lyso OligoA.tif Lyso.csv	1.33019	2.17267	0.57245	1.25841	0.5792	17.0799	0.88676	145.975	100	2805	112.238	79.6156	30.9638	0.68438	0.46026	0.84615
	Lysotracker	Distal	Oligomycin A	Ctrl	Ctrl D5 Lyso OligoA.tif Lyso.csv	4.19403	1.98783	6.50513	4.05763	2.04124	27.2397	0.68344	1658.81	100	31875	51.5563	82.125	22.3801	2.34163	0.50306	0.86207
	Lysotracker	Distal	Oligomycin A	Ctrl	Ctrl D5 Lyso OligoA.tif Lyso.csv	2.45698	1.38372	2.55001	2.11958	1.5318	66.3746	0.69343	650.253	100	12495	31.025	83.0375	68.1986	1.65994	0.72269	0.80992
	Lysotracker	Distal	Oligomycin A	Ctrl	Ctrl D5 Lyso OligoA.tif Lyso.csv	2.24677	1.77965	1.87348	2.06038	1.15774	163.36	0.85737	477.737	100	9180	60.9094	80.9844	156.038	1.36875	0.56191	0.83721
	Lysotracker	Distal	Oligomycin A	Ctrl	Ctrl D5 Lyso OligoA.tif Lyso.csv	1.33019	1.36649	0.72857	1.12589	0.82393	159.337	0.91063	185.786	100	3570	73.4563	80.9844	149.036	0.9125	0.7318	0.84848
	Lysotracker	Distal	Oligomycin A	Ctrl	Ctrl D5 Lyso OligoA.tif Lyso.csv	1.14063	1.98867	0.41633	1.02673	0.51629	158.645	0.91441	106.164	100	2040	106.078	80.7563	143.13	0.64983	0.50285	0.8
	Lysotracker	Distal	Oligomycin A	Ctrl	Ctrl D5 Lyso OligoA.tif Lyso.csv	4.48195	1.43185	7.59799	3.7218	2.59929	179.471	0.57623	1937.49	100	37230	4.5625	82.125	165.256	3.11625	0.6984	0.77867
	Lysotracker	Distal	Oligomycin A	Ctrl	Ctrl D5 Lyso OligoA.tif Lyso.csv	2.32643	1.58481	2.28981	2.14953	1.35633	178.413	0.77984	583.9	100	11220	47.9063	81.6688	168.69	1.59688	0.63099	0.80734
	Lysotracker	Distal	Oligomycin A	Ctrl	Ctrl D5 Lyso OligoA.tif Lyso.csv	2.32643	2.73896	1.1449	1.99817	0.72954	170.809	0.5352	291.95	100	5610	108.359	81.4406	168.69	0.9125	0.3651	0.74576
	Lysotracker	Distal	Oligomycin A	Ctrl	Ctrl D5 Lyso OligoA.tif Lyso.csv	1.14063	2.33949	0.36429	1.04169	0.44526	123.401	0.80011	92.8932	100	1785	70.0344	81.4406	126.87	0.61247	0.42744	0.77778
	Lysotracker	Distal	Oligomycin A	Ctrl	Ctrl D5 Lyso OligoA.tif Lyso.csv	1.88117	1.71242	1.35307	1.71759	1.00302	90.7038	0.60634	345.032	100	6630	28.9719	83.7219	75.9638	1.14063	0.58397	0.74286
	Lysotracker	Distal	Oligomycin A	Ctrl	Ctrl D5 Lyso OligoA.tif Lyso.csv	1.29047	1.2507	0.78062	1.11494	0.89145	155.015	0.97567	199.057	100	3825	66.3844	81.8969	135	0.9125	0.79955	0.85714
	Lysotracker	Distal	Oligomycin A	Ctrl	Ctrl D5 Lyso OligoA.tif Lyso.csv	2.16418	1.46195	1.97756	1.91861	1.31236	11.6978	0.76584	504.278	100	9690	15.7406	83.0375	161.565	1.36875	0.68402	0.83516
	Lysotracker	Distal	Oligomycin A	Ctrl	Ctrl D5 Lyso OligoA.tif Lyso.csv	1.14063	1.28124	0.62449	1.00933	0.78778	32.0668	1	159.246	100	3060	18.0219	83.7219	36.8699	0.9125	0.78049	0.85714
	Lysotracker	Distal	Oligomycin A	Ctrl	Ctrl D5 Lyso OligoA.tif Lyso.csv	2.3817	1.26663	3.07042	2.22525	1.75683	9.19271	0.95941	782.957	100	15045	31.7094	84.1781	163.301	1.825	0.7895	0.88722
	Lysotracker	Distal	Oligomycin A	Ctrl	Ctrl D5 Lyso OligoA.tif Lyso.csv	1.14063	1.13493	0.62449	0.94995	0.83702	160.195	1	159.246	100	3060	28.0594	84.4063	143.13	0.9125	0.88111	0.85714
	Lysotracker	Distal	Oligomycin A	Ctrl	Ctrl D5 Lyso OligoA.tif Lyso.csv	1.14063	2.60461	0.26021	0.92893	0.35665	31.7175	0.51263	66.3523	100	1275	15.7406	85.0906	36.8699	0.57069	0.38393	0.58824
	Lysotracker	Distal	Oligomycin A	Ctrl	Ctrl D5 Lyso OligoA.tif Lyso.csv	0.82252	1.55299	0.26021	0.71729	0.46188	161.565	1	66.3523	100	1275	13.2312	85.0906	146.31	0.45625	0.64392	0.90909
	Lysotracker	Distal	Oligomycin A	Ctrl	Ctrl D5 Lyso OligoA.tif Lyso.csv	0.64524	1	0.20816	0.51482	0.51482	0	1	53.0819	100	1020	19.3906	85.0906	135	0.45625	1	1
	Lysotracker	Distal	PARGi	FUS	FUS D1 Lyso PARGi.tif Lyso.csv	1.33019	1.33592	0.8847	1.22671	0.91825	7.13226	1	225.598	100	4335	88.5125	26.4625	149.036	0.9125	0.74855	0.91892
	Lysotracker	Distal	PARGi	FUS	FUS D1 Lyso PARGi.tif Lyso.csv	1.02021	1.41576	0.41633	0.8663	0.6119	172.982	0.91441	106.164	100	2040	95.1281	26.6906	153.435	0.68438	0.70633	0.8
	Lysotracker	Distal	PARGi	FUS	FUS D1 Lyso PARGi.tif Lyso.csv	2.60103	1.57234	2.75817	2.34984	1.49449	87.7023	0.68361	703.335	100	13515	18.4781	29.4281	74.7449	1.825	0.636	0.79699
	Lysotracker	Distal	PARGi	FUS	FUS D1 Lyso PARGi.tif Lyso.csv	3.17741	1.57411	4.57961	3.02961	1.92465	159.45	0.77812	1167.8	100	22440	53.6094	27.8313	158.962	2.14278	0.63528	0.84615
	Lysotracker	Distal	PARGi	FUS	FUS D1 Lyso PARGi.tif Lyso.csv	1.46071	1.136	1.04082	1.22697	1.08007	7.38022	0.9942	265.409	100	5100	104.709	28.7437	38.6598	1.14063	0.88028	0.88889
	Lysotracker	Distal	PARGi	FUS	FUS D1 Lyso PARGi.tif Lyso.csv	1.78171	1.2337	1.19694	1.37119	1.11144	143.469	0.75572	305.221	100	5865	43.5719	28.2875	140.194	1.29884	0.81057	0.77966
	Lysotracker	Distal	PARGi	FUS	FUS D1 Lyso PARGi.tif Lyso.csv	0.96785	1.24681	0.36429	0.76046	0.60993	56.5993	0.8976	92.8932	100	1785	6.61563	28.9719	45	0.68438	0.80205	0.82353
	Lysotracker	Distal	PARGi	FUS	FUS D1 Lyso PARGi.tif Lyso.csv	1.02021	1.34281	0.46837	0.89486	0.66641	168.019	0.92273	119.434	100	2295	110.641	28.5156	153.435	0.68438	0.74471	0.85714
	Lysotracker	Distal	PARGi	FUS	FUS D1 Lyso PARGi.tif Lyso.csv	0.96785	1.37971	0.36429	0.79997	0.57981	30.4727	1	92.8932	100	1785	30.3406	29.2	45	0.68438	0.72479	0.875
	Lysotracker	Distal	PARGi	FUS	FUS D1 Lyso PARGi.tif Lyso.csv	0.64524	1.46385	0.15612	0.53943	0.3685	45	1	39.8114	100	765	84.6344	28.9719	45	0.45625	0.68313	0.85714
	Lysotracker	Distal	PARGi	FUS	FUS D1 Lyso PARGi.tif Lyso.csv	0.64524	1.46385	0.15612	0.53943	0.3685	45	1	39.8114	100	765	5.01875	29.2	45	0.45625	0.68313	0.85714
	Lysotracker	Distal	PARGi	FUS	FUS D1 Lyso PARGi.tif Lyso.csv	1.33019	1.29861	0.78062	1.13609	0.87485	114.543	0.869	199.057	100	3825	57.7156	29.6562	149.036	1.01012	0.77006	0.76923
	Lysotracker	Distal	PARGi	FUS	FUS D1 Lyso PARGi.tif Lyso.csv	1.22849	1.38873	0.62449	1.05082	0.75668	11.3099	0.85073	159.246	100	3060	38.7813	30.3406	21.8014	0.9125	0.72008	0.77419
	Lysotracker	Distal	PARGi	FUS	FUS D1 Lyso PARGi.tif Lyso.csv	1.8392	1.22502	1.71735	1.63665	1.33602	50.9419	0.94298	437.925	100	8415	17.7937	31.4812	60.2551	1.45178	0.81631	0.85714
	Lysotracker	Distal	PARGi	FUS	FUS D1 Lyso PARGi.tif Lyso.csv	2.04041	1.05471	2.49797	1.83154	1.73653	90.2387	0.96737	636.982	100	12240	23.9531	31.9375	63.435	1.825	0.94813	0.88889
	Lysotracker	Distal	PARGi	FUS	FUS D1 Lyso PARGi.tif Lyso.csv	0.82252	1.5	0.31225	0.77223	0.51482	90	1	79.6228	100	1530	54.0656	30.3406	123.69	0.45625	0.66667	1
	Lysotracker	Distal	PARGi	FUS	FUS D1 Lyso PARGi.tif Lyso.csv	1.16321	1.57659	0.52041	1.02208	0.64829	7.68813	0.88747	132.705	100	2550	96.2688	31.2531	168.69	0.68438	0.63428	0.8
	Lysotracker	Distal	PARGi	FUS	FUS D1 Lyso PARGi.tif Lyso.csv	1.78171	1.23881	1.61327	1.59519	1.28767	34.0797	0.90669	411.384	100	7905	13.0031	32.6219	39.8056	1.36875	0.80722	0.86111
	Lysotracker	Distal	PARGi	FUS	FUS D1 Lyso PARGi.tif Lyso.csv	1.29047	1.33597	0.62449	1.03067	0.77147	72.7039	0.57872	159.246	100	3060	7.07188	34.2188	45	0.9125	0.74852	0.70588
	Lysotracker	Distal	PARGi	FUS	FUS D1 Lyso PARGi.tif Lyso.csv	1.8392	1.16049	1.87348	1.66379	1.4337	17.0791	0.97356	477.737	100	9180	100.831	82.8094	150.255	1.53089	0.86171	0.87805
	Lysotracker	Distal	PARGi	FUS	FUS D1 Lyso PARGi.tif Lyso.csv	2.75645	2.46463	2.28981	2.68059	1.08762	157.881	0.64789	583.9	100	11220	110.184	82.8094	155.556	1.32673	0.40574	0.82243
	Lysotracker	Distal	PARGi	FUS	FUS D1 Lyso PARGi.tif Lyso.csv	0.94058	1.52753	0.31225	0.77929	0.51016	0	0.76937	79.6228	100	1530	41.2906	83.0375	165.964	0.68438	0.65465	0.66667
	Lysotracker	Distal	PARGi	FUS	FUS D1 Lyso PARGi.tif Lyso.csv	0.82252	2.70203	0.15612	0.73288	0.27123	28.155	0.75398	39.8114	100	765	102.656	83.4938	33.6901	0.40831	0.37009	0.66667
	Lysotracker	Distal	PARGi	FUS	FUS D1 Lyso PARGi.tif Lyso.csv	1.53031	1.22201	1.19694	1.36467	1.11675	78.8403	0.96418	305.221	100	5865	64.3313	84.4063	116.565	1.14063	0.81832	0.86792
	Lysotracker	Distal	PARGi	FUS	FUS D1 Lyso PARGi.tif Lyso.csv	1.14063	1.37205	0.57245	1.00002	0.72885	74.9293	1	145.975	100	2805	79.6156	86.0031	53.1301	0.68438	0.72883	0.95652
	Lysotracker	Distal	PARGi	FUS	FUS D1 Lyso PARGi.tif Lyso.csv	2.66037	1.98208	2.49797	2.51078	1.26674	71.9036	0.65334	636.982	100	12240	81.4406	87.3719	59.0362	1.6482	0.50452	0.77419
	Lysotracker	Distal	PARGi	FUS	FUS D1 Lyso PARGi.tif Lyso.csv	0.72139	1.5667	0.15612	0.55806	0.3562	90	0.5236	39.8114	100	765	104.025	85.0906	108.435	0.45625	0.63828	0.6
	Lysotracker	Distal	PARGi	FUS	FUS D1 Lyso PARGi.tif Lyso.csv	1.33019	1.26316	0.8847	1.19284	0.94433	164.828	1	225.598	100	4335	112.238	85.0906	149.036	0.9125	0.79166	0.91892
	Lysotracker	Distal	PARGi	FUS	FUS D1 Lyso PARGi.tif Lyso.csv	0.82252	1.49607	0.26021	0.70403	0.47058	34.0993	0.87266	66.3523	100	1275	60.225	86.2313	33.6901	0.61247	0.66842	0.71429
	Lysotracker	Distal	PARGi	FUS	FUS D1 Lyso PARGi.tif Lyso.csv	1.46071	1.24096	0.93674	1.21659	0.98036	56.024	0.96454	238.868	100	4590	67.0688	86.4594	38.6598	1.12257	0.80583	0.85714
	Lysotracker	Distal	PARGi	FUS	FUS D1 Lyso PARGi.tif Lyso.csv	3.45216	2.3774	3.64287	3.32069	1.39677	178.488	0.58221	928.932	100	17850	84.1781	86.6875	7.59464	1.59688	0.42063	0.77348
	Lysotracker	Distal	PARGi	FUS	FUS D1 Lyso PARGi.tif Lyso.csv	0.72139	1.5667	0.15612	0.55806	0.3562	0	0.5236	39.8114	100	765	17.3375	86.2313	161.565	0.45625	0.63828	0.6
	Lysotracker	Distal	PARGi	FUS	FUS D1 Lyso PARGi.tif Lyso.csv	1.02021	1.38959	0.46837	0.91032	0.6551	55.4272	0.88357	119.434	100	2295	74.5969	86.6875	26.565	0.80654	0.71964	0.75
	Lysotracker	Distal	PARGi	FUS	FUS D1 Lyso PARGi.tif Lyso.csv	1.02021	1.02791	0.52041	0.82529	0.80288	63.435	0.98175	132.705	100	2550	106.991	86.6875	153.435	0.9125	0.97285	0.76923
	Lysotracker	Distal	PARGi	FUS	FUS D1 Lyso PARGi.tif Lyso.csv	2.25832	1.1222	2.34185	1.82924	1.63004	14.2829	0.73175	597.171	100	11475	37.6406	88.2844	45	1.59688	0.8911	0.82569
	Lysotracker	Distal	PARGi	FUS	FUS D1 Lyso PARGi.tif Lyso.csv	1.88117	1.07375	1.97756	1.64427	1.53132	73.0565	0.95299	504.278	100	9690	57.4875	86.6875	104.036	1.59688	0.93131	0.86364
	Lysotracker	Distal	PARGi	FUS	FUS D1 Lyso PARGi.tif Lyso.csv	1.33019	1.17576	0.93674	1.1842	1.00717	33.4468	0.86808	238.868	100	4590	89.425	87.6	30.9638	1.12916	0.85051	0.83721
	Lysotracker	Distal	PARGi	FUS	FUS D1 Lyso PARGi.tif Lyso.csv	1.02021	1.34027	0.46837	0.89402	0.66704	20.3007	1	119.434	100	2295	83.0375	87.6	26.565	0.68438	0.74612	0.85714
	Lysotracker	Distal	PARGi	FUS	FUS D1 Lyso PARGi.tif Lyso.csv	2.67014	1.8705	2.70613	2.53868	1.35722	7.52923	0.63648	690.064	100	13260	107.903	88.0563	19.9831	1.59688	0.53462	0.8
	Lysotracker	Distal	PARGi	FUS	FUS D1 Lyso PARGi.tif Lyso.csv	2.04041	1.44123	1.97756	1.90496	1.32176	6.52762	0.86055	504.278	100	9690	1.14063	88.7406	26.565	1.36875	0.69385	0.89412
	Lysotracker	Distal	PARGi	FUS	FUS D1 Lyso PARGi.tif Lyso.csv	0.82252	2.70203	0.15612	0.73288	0.27123	61.845	0.64303	39.8114	100	765	43.5719	88.0563	56.3099	0.40831	0.37009	0.66667
	Lysotracker	Distal	PARGi	FUS	FUS D1 Lyso PARGi.tif Lyso.csv	0.96785	1.22859	0.41633	0.80701	0.65686	135	1	106.164	100	2040	43.8	88.9688	135	0.68438	0.81394	0.94118
	Lysotracker	Distal	PARGi	FUS	FUS D1 Lyso PARGi.tif Lyso.csv	1.22849	1.20894	0.83266	1.13212	0.93645	90	1	212.327	100	4080	1.825	89.8813	111.801	0.9125	0.82717	0.88889
	Lysotracker	Distal	PARGi	FUS	FUS D2 Lyso PARGi.tif Lyso.csv	1.33019	1.21751	0.93674	1.20504	0.98976	0	1	238.868	100	4590	95.3563	26.2344	149.036	0.9125	0.82135	0.94737
	Lysotracker	Distal	PARGi	FUS	FUS D2 Lyso PARGi.tif Lyso.csv	2.10321	2.16455	1.56123	2.07431	0.95831	1.218e-14	0.82988	398.114	100	7650	85.0906	26.9187	167.471	0.9125	0.46199	0.90909
	Lysotracker	Distal	PARGi	FUS	FUS D2 Lyso PARGi.tif Lyso.csv	2.04041	2.55911	1.24898	2.01734	0.7883	19.1565	0.70196	318.491	100	6120	79.1594	28.2875	26.565	0.93855	0.39076	0.81356
	Lysotracker	Distal	PARGi	FUS	FUS D2 Lyso PARGi.tif Lyso.csv	1.14063	1.49149	0.52041	0.99412	0.66653	50.8841	0.88747	132.705	100	2550	89.425	27.8313	36.8699	0.80654	0.67047	0.8
	Lysotracker	Distal	PARGi	FUS	FUS D2 Lyso PARGi.tif Lyso.csv	1.02021	1.34027	0.46837	0.89402	0.66704	69.6993	1	119.434	100	2295	25.0938	28.2875	63.435	0.68438	0.74612	0.85714
	Lysotracker	Distal	PARGi	FUS	FUS D2 Lyso PARGi.tif Lyso.csv	1.53031	1.3302	1.1449	1.39251	1.04684	26.565	0.98798	291.95	100	5610	20.075	29.2	26.565	1.14063	0.75177	0.86275
	Lysotracker	Distal	PARGi	FUS	FUS D2 Lyso PARGi.tif Lyso.csv	2.15213	1.26775	2.34185	1.94424	1.53362	72.5298	0.8496	597.171	100	11475	10.2656	30.3406	57.9946	1.63326	0.7888	0.83333
	Lysotracker	Distal	PARGi	FUS	FUS D2 Lyso PARGi.tif Lyso.csv	1.02021	1.34027	0.46837	0.89402	0.66704	159.699	1	119.434	100	2295	46.0813	28.7437	153.435	0.68438	0.74612	0.85714
	Lysotracker	Distal	PARGi	FUS	FUS D2 Lyso PARGi.tif Lyso.csv	1.29047	1.65144	0.62449	1.14591	0.69388	45.0001	1	159.246	100	3060	13.0031	29.6562	45	0.80654	0.60553	0.88889
	Lysotracker	Distal	PARGi	FUS	FUS D2 Lyso PARGi.tif Lyso.csv	1.46071	1.34391	0.98878	1.30074	0.96788	55.6513	1	252.139	100	4845	1.825	30.3406	38.6598	1.12257	0.7441	0.88372
	Lysotracker	Distal	PARGi	FUS	FUS D2 Lyso PARGi.tif Lyso.csv	1.44279	1.42626	0.8847	1.26751	0.8887	176.092	0.98486	225.598	100	4335	95.1281	29.4281	161.565	0.9125	0.70113	0.82927
	Lysotracker	Distal	PARGi	FUS	FUS D2 Lyso PARGi.tif Lyso.csv	2.15213	1.78133	1.71735	1.97359	1.10793	24.093	0.78592	437.925	100	8415	100.603	30.3406	32.0054	1.32673	0.56138	0.85714
	Lysotracker	Distal	PARGi	FUS	FUS D2 Lyso PARGi.tif Lyso.csv	0.96785	1.22859	0.41633	0.80701	0.65686	45.0002	1	106.164	100	2040	23.0406	30.1125	45	0.68438	0.81394	0.94118
	Lysotracker	Distal	PARGi	FUS	FUS D2 Lyso PARGi.tif Lyso.csv	0.64524	1.46385	0.15612	0.53943	0.3685	45	1	39.8114	100	765	96.9531	29.8844	45	0.45625	0.68313	0.85714
	Lysotracker	Distal	PARGi	FUS	FUS D2 Lyso PARGi.tif Lyso.csv	0.64524	1	0.20816	0.51482	0.51482	0	1	53.0819	100	1020	19.6187	29.8844	135	0.45625	1	1
	Lysotracker	Distal	PARGi	FUS	FUS D2 Lyso PARGi.tif Lyso.csv	0.96785	1.37971	0.36429	0.79997	0.57981	149.527	1	92.8932	100	1785	97.8656	29.8844	135	0.68438	0.72479	0.875
	Lysotracker	Distal	PARGi	FUS	FUS D2 Lyso PARGi.tif Lyso.csv	0.96785	1.22859	0.41633	0.80701	0.65686	135	1	106.164	100	2040	26.4625	30.1125	135	0.68438	0.81394	0.94118
	Lysotracker	Distal	PARGi	FUS	FUS D2 Lyso PARGi.tif Lyso.csv	0.96785	1	0.46837	0.77223	0.77223	0	1	119.434	100	2295	88.2844	30.1125	135	0.68438	1	1
	Lysotracker	Distal	PARGi	FUS	FUS D2 Lyso PARGi.tif Lyso.csv	2.10321	1.34874	2.18572	1.93739	1.43645	174.839	0.90554	557.359	100	10710	93.075	30.5688	167.471	1.36875	0.74143	0.89362
	Lysotracker	Distal	PARGi	FUS	FUS D2 Lyso PARGi.tif Lyso.csv	0.82252	1.55299	0.26021	0.71729	0.46188	108.435	1	66.3523	100	1275	12.775	30.3406	123.69	0.45625	0.64392	0.90909
	Lysotracker	Distal	PARGi	FUS	FUS D2 Lyso PARGi.tif Lyso.csv	0.82252	2	0.20816	0.72807	0.36403	18.435	0.85737	53.0819	100	1020	69.1219	30.7969	33.6901	0.45625	0.5	0.8
	Lysotracker	Distal	PARGi	FUS	FUS D2 Lyso PARGi.tif Lyso.csv	1.44279	1.50414	0.83266	1.26279	0.83954	70.3077	0.85737	212.327	100	4080	84.8625	31.7094	71.565	0.9125	0.66483	0.82051
	Lysotracker	Distal	PARGi	FUS	FUS D2 Lyso PARGi.tif Lyso.csv	0.82252	1.5	0.31225	0.77223	0.51482	0	1	79.6228	100	1530	112.009	30.5688	146.31	0.45625	0.66667	1
	Lysotracker	Distal	PARGi	FUS	FUS D2 Lyso PARGi.tif Lyso.csv	0.64524	1.46385	0.15612	0.53943	0.3685	135	1	39.8114	100	765	10.7219	30.7969	135	0.45625	0.68313	0.85714
	Lysotracker	Distal	PARGi	FUS	FUS D2 Lyso PARGi.tif Lyso.csv	1.33019	1.23797	0.8847	1.18089	0.95389	26.1185	0.98486	225.598	100	4335	109.272	32.1656	30.9638	1.12257	0.80777	0.82927
	Lysotracker	Distal	PARGi	FUS	FUS D2 Lyso PARGi.tif Lyso.csv	0.82252	1.55299	0.26021	0.71729	0.46188	18.435	1	66.3523	100	1275	17.7937	31.9375	33.6901	0.45625	0.64392	0.90909
	Lysotracker	Distal	PARGi	FUS	FUS D2 Lyso PARGi.tif Lyso.csv	0.96785	1.22859	0.41633	0.80701	0.65686	45.0002	1	106.164	100	2040	65.0156	32.1656	45	0.68438	0.81394	0.94118
	Lysotracker	Distal	PARGi	FUS	FUS D2 Lyso PARGi.tif Lyso.csv	1.02021	1.15777	0.46837	0.83092	0.71769	26.565	0.88357	119.434	100	2295	112.694	32.6219	26.565	0.80654	0.86373	0.75
	Lysotracker	Distal	PARGi	FUS	FUS D2 Lyso PARGi.tif Lyso.csv	1.22849	1.3058	0.67653	1.06057	0.8122	16.2356	0.92163	172.516	100	3315	50.6438	33.0781	21.8014	0.9125	0.76581	0.83871
	Lysotracker	Distal	PARGi	FUS	FUS D2 Lyso PARGi.tif Lyso.csv	0.82252	1.06885	0.36429	0.7041	0.65875	90	1	92.8932	100	1785	78.2469	32.1656	123.69	0.68438	0.93559	0.875
	Lysotracker	Distal	PARGi	FUS	FUS D2 Lyso PARGi.tif Lyso.csv	0.96785	1.22859	0.41633	0.80701	0.65686	45.0002	1	106.164	100	2040	75.9656	33.0781	45	0.68438	0.81394	0.94118
	Lysotracker	Distal	PARGi	FUS	FUS D2 Lyso PARGi.tif Lyso.csv	0.96785	1.22859	0.41633	0.80701	0.65686	45.0002	1	106.164	100	2040	86.0031	33.0781	45	0.68438	0.81394	0.94118
	Lysotracker	Distal	PARGi	FUS	FUS D2 Lyso PARGi.tif Lyso.csv	0.82252	1.55299	0.26021	0.71729	0.46188	161.565	1	66.3523	100	1275	24.1812	32.6219	146.31	0.45625	0.64392	0.90909
	Lysotracker	Distal	PARGi	FUS	FUS D2 Lyso PARGi.tif Lyso.csv	0.64524	1	0.20816	0.51482	0.51482	0	1	53.0819	100	1020	105.394	32.6219	135	0.45625	1	1
	Lysotracker	Distal	PARGi	FUS	FUS D2 Lyso PARGi.tif Lyso.csv	1.02021	1.3083	0.41633	0.83277	0.63653	55.278	0.91441	106.164	100	2040	21.9	33.7625	63.435	0.68438	0.76435	0.8
	Lysotracker	Distal	PARGi	FUS	FUS D2 Lyso PARGi.tif Lyso.csv	1.14063	1.13493	0.62449	0.94995	0.83702	70.1947	1	159.246	100	3060	31.025	33.7625	53.1301	0.9125	0.88111	0.85714
	Lysotracker	Distal	PARGi	FUS	FUS D2 Lyso PARGi.tif Lyso.csv	0.82252	1.55299	0.26021	0.71729	0.46188	161.565	1	66.3523	100	1275	98.7781	32.85	146.31	0.45625	0.64392	0.90909
	Lysotracker	Distal	PARGi	FUS	FUS D2 Lyso PARGi.tif Lyso.csv	0.82252	1.1239	0.31225	0.66845	0.59476	63.435	0.91631	79.6228	100	1530	25.7781	33.3062	123.69	0.68438	0.88976	0.8
	Lysotracker	Distal	PARGi	FUS	FUS D2 Lyso PARGi.tif Lyso.csv	1.96241	1.26153	1.82144	1.71045	1.35585	19.5453	1	464.466	100	8925	44.0281	34.675	35.5377	1.36875	0.79269	0.92105
	Lysotracker	Distal	PARGi	FUS	FUS D2 Lyso PARGi.tif Lyso.csv	1.46071	1.36372	0.8847	1.23941	0.90884	49.3078	0.91096	225.598	100	4335	1.825	34.675	38.6598	1.0825	0.73329	0.82927
	Lysotracker	Distal	PARGi	FUS	FUS D2 Lyso PARGi.tif Lyso.csv	0.64524	1	0.20816	0.51482	0.51482	0	1	53.0819	100	1020	20.3031	33.5344	135	0.45625	1	1
	Lysotracker	Distal	PARGi	FUS	FUS D2 Lyso PARGi.tif Lyso.csv	1.9491	1.97427	1.35307	1.84424	0.93414	10.2463	0.82509	345.032	100	6630	15.9688	34.9031	20.556	0.9125	0.50652	0.91228
	Lysotracker	Distal	PARGi	FUS	FUS D2 Lyso PARGi.tif Lyso.csv	1.64503	2.15455	0.8847	1.55787	0.72306	22.5	0.84507	225.598	100	4335	27.6031	35.1313	33.6901	0.86616	0.46413	0.85
	Lysotracker	Distal	PARGi	FUS	FUS D2 Lyso PARGi.tif Lyso.csv	1.02021	1.23565	0.52041	0.90485	0.73229	0	1	132.705	100	2550	18.7063	34.4469	153.435	0.68438	0.80929	0.90909
	Lysotracker	Distal	PARGi	FUS	FUS D2 Lyso PARGi.tif Lyso.csv	0.64524	1.46385	0.15612	0.53943	0.3685	45	1	39.8114	100	765	9.58125	35.1313	45	0.45625	0.68313	0.85714
	Lysotracker	Distal	PARGi	FUS	FUS D2 Lyso PARGi.tif Lyso.csv	0.64524	1.46385	0.15612	0.53943	0.3685	135	1	39.8114	100	765	20.075	34.675	135	0.45625	0.68313	0.85714
	Lysotracker	Distal	PARGi	FUS	FUS D2 Lyso PARGi.tif Lyso.csv	1.22849	1.50364	0.62449	1.09343	0.72719	36.6504	0.93084	159.246	100	3060	102.2	83.95	21.8014	0.80654	0.66505	0.8
	Lysotracker	Distal	PARGi	FUS	FUS D2 Lyso PARGi.tif Lyso.csv	1.14063	1.49198	0.41633	0.88931	0.59606	119.872	0.7854	106.164	100	2040	28.0594	84.8625	126.87	0.68438	0.67025	0.7619
	Lysotracker	Distal	PARGi	FUS	FUS D2 Lyso PARGi.tif Lyso.csv	1.33019	1.25745	0.93674	1.22464	0.97391	141.526	1	238.868	100	4590	51.1	85.3188	120.964	1.12257	0.79526	0.85714
	Lysotracker	Distal	PARGi	FUS	FUS D2 Lyso PARGi.tif Lyso.csv	0.82252	1.55299	0.26021	0.71729	0.46188	108.435	1	66.3523	100	1275	7.07188	85.5469	123.69	0.45625	0.64392	0.90909
	Lysotracker	Distal	PARGi	FUS	FUS D2 Lyso PARGi.tif Lyso.csv	1.22849	1.18561	0.78062	1.08554	0.91559	174.116	0.97567	199.057	100	3825	17.5656	85.775	158.199	0.9125	0.84344	0.88235
	Lysotracker	Distal	PARGi	FUS	FUS D2 Lyso PARGi.tif Lyso.csv	1.66078	1.45024	1.35307	1.58065	1.08992	176.966	0.85429	345.032	100	6630	40.3781	85.775	164.055	1.14063	0.68954	0.83871
	Lysotracker	Distal	PARGi	FUS	FUS D2 Lyso PARGi.tif Lyso.csv	0.96785	1.22859	0.41633	0.80701	0.65686	45.0002	1	106.164	100	2040	103.113	86.6875	45	0.68438	0.81394	0.94118
	Lysotracker	Distal	PARGi	FUS	FUS D2 Lyso PARGi.tif Lyso.csv	1.64503	1.13604	1.45715	1.45179	1.27794	58.4489	1	371.573	100	7140	14.3719	87.6	56.3099	1.36875	0.88025	0.88889
	Lysotracker	Distal	PARGi	FUS	FUS D2 Lyso PARGi.tif Lyso.csv	0.82252	2.03127	0.20816	0.73374	0.36122	58.2825	0.85737	53.0819	100	1020	48.3625	87.1438	56.3099	0.45625	0.4923	0.8
	Lysotracker	Distal	PARGi	FUS	FUS D2 Lyso PARGi.tif Lyso.csv	1.02021	1.15777	0.46837	0.83092	0.71769	26.565	0.88357	119.434	100	2295	104.025	87.3719	26.565	0.80654	0.86373	0.75
	Lysotracker	Distal	PARGi	FUS	FUS D2 Lyso PARGi.tif Lyso.csv	1.14063	1.01986	0.72857	0.97266	0.95372	90	1	185.786	100	3570	23.9531	86.9156	126.87	0.9125	0.98052	0.93333
	Lysotracker	Distal	PARGi	FUS	FUS D2 Lyso PARGi.tif Lyso.csv	0.82252	1.29099	0.31225	0.71642	0.55493	45	1	79.6228	100	1530	43.8	87.6	33.6901	0.64524	0.7746	0.8
	Lysotracker	Distal	PARGi	FUS	FUS D2 Lyso PARGi.tif Lyso.csv	1.22849	1.2874	0.67653	1.05307	0.81798	52.1614	0.92163	172.516	100	3315	26.4625	88.2844	68.1986	0.9125	0.77676	0.8125
	Lysotracker	Distal	PARGi	FUS	FUS D2 Lyso PARGi.tif Lyso.csv	2.04041	2.20627	1.40511	1.98673	0.90049	73.3901	0.73017	358.303	100	6885	36.0438	89.1969	63.435	1.05156	0.45325	0.81818
	Lysotracker	Distal	PARGi	FUS	FUS D2 Lyso PARGi.tif Lyso.csv	0.72139	3	0.15612	0.77223	0.25741	0	0.96737	39.8114	100	765	18.4781	87.6	161.565	0.22813	0.33333	1
	Lysotracker	Distal	PARGi	FUS	FUS D2 Lyso PARGi.tif Lyso.csv	0.94058	1.38707	0.36429	0.8021	0.57827	169.099	0.8976	92.8932	100	1785	41.7469	87.8281	165.964	0.68438	0.72094	0.73684
	Lysotracker	Distal	PARGi	FUS	FUS D2 Lyso PARGi.tif Lyso.csv	0.82252	1.29099	0.31225	0.71642	0.55493	45	1	79.6228	100	1530	56.1188	88.2844	33.6901	0.64524	0.7746	0.8
	Lysotracker	Distal	PARGi	FUS	FUS D2 Lyso PARGi.tif Lyso.csv	1.96241	1.26867	2.0296	1.81065	1.42721	58.823	0.86528	517.548	100	9945	1.14063	89.425	35.5377	1.53089	0.78823	0.85714
	Lysotracker	Distal	PARGi	FUS	FUS D2 Lyso PARGi.tif Lyso.csv	0.82252	1.5	0.31225	0.77223	0.51482	90	1	79.6228	100	1530	40.6063	87.8281	123.69	0.45625	0.66667	1
	Lysotracker	Distal	PARGi	FUS	FUS D2 Lyso PARGi.tif Lyso.csv	0.94058	1.19523	0.41633	0.79597	0.66596	90	0.91441	106.164	100	2040	35.1313	88.0563	104.036	0.68438	0.83666	0.8
	Lysotracker	Distal	PARGi	FUS	FUS D2 Lyso PARGi.tif Lyso.csv	0.72139	1	0.26021	0.57559	0.57559	0	0.87266	66.3523	100	1275	81.2125	88.2844	108.435	0.64524	1	0.71429
	Lysotracker	Distal	PARGi	FUS	FUS D2 Lyso PARGi.tif Lyso.csv	1.46071	1.52567	0.8847	1.31094	0.85925	50.655	0.91096	225.598	100	4335	9.35313	90.1094	38.6598	1.02078	0.65545	0.82927
	Lysotracker	Distal	PARGi	FUS	FUS D2 Lyso PARGi.tif Lyso.csv	2.04041	1.51214	1.92552	1.92542	1.2733	173.354	0.94836	491.007	100	9435	106.763	89.6531	153.435	1.36875	0.66131	0.89157
	Lysotracker	Distal	PARGi	FUS	FUS D2 Lyso PARGi.tif Lyso.csv	0.64524	1.46385	0.15612	0.53943	0.3685	45	1	39.8114	100	765	79.3875	89.8813	45	0.45625	0.68313	0.85714
	Lysotracker	Distal	PARGi	FUS	FUS D2 Lyso PARGi.tif Lyso.csv	1.53031	1.97652	0.8847	1.49212	0.75492	4.30782	0.94053	225.598	100	4335	104.253	90.5656	26.565	0.68438	0.50594	0.97143
	Lysotracker	Distal	PARGi	FUS	FUS D2 Lyso PARGi.tif Lyso.csv	0.64524	1.46385	0.15612	0.53943	0.3685	45	1	39.8114	100	765	4.5625	90.5656	45	0.45625	0.68313	0.85714
	Lysotracker	Distal	PARGi	FUS	FUS D2 Lyso PARGi.tif Lyso.csv	0.96785	1.22859	0.41633	0.80701	0.65686	45.0002	1	106.164	100	2040	7.75625	90.7938	45	0.68438	0.81394	0.94118
	Lysotracker	Distal	PARGi	FUS	FUS D2 Lyso PARGi.tif Lyso.csv	1.14063	1.14806	0.67653	0.99445	0.8662	166.224	1	172.516	100	3315	0.45625	90.3375	126.87	0.9125	0.87104	0.89655
	Lysotracker	Distal	PARGi	FUS	FUS D2 Lyso PARGi.tif Lyso.csv	1.66078	1.70373	1.1449	1.57594	0.925	4.48185	0.86288	291.95	100	5610	1.59688	90.7938	164.055	0.9125	0.58695	0.89796
	Lysotracker	Distal	PARGi	FUS	FUS D3 Lyso PARGi.tif Lyso.csv	0.64524	1.46385	0.15612	0.53943	0.3685	45	1	39.8114	100	765	83.2656	27.6031	45	0.45625	0.68313	0.85714
	Lysotracker	Distal	PARGi	FUS	FUS D3 Lyso PARGi.tif Lyso.csv	2.04041	1.83348	1.61327	1.94065	1.05845	161.92	0.9602	411.384	100	7905	100.375	27.375	153.435	1.14063	0.54541	0.89855
	Lysotracker	Distal	PARGi	FUS	FUS D3 Lyso PARGi.tif Lyso.csv	1.96241	1.48682	1.61327	1.74758	1.17538	10.8163	0.85754	411.384	100	7905	104.025	28.2875	35.5377	1.14063	0.67258	0.92537
	Lysotracker	Distal	PARGi	FUS	FUS D3 Lyso PARGi.tif Lyso.csv	1.44279	1.09328	1.09286	1.2334	1.12816	111.331	1	278.68	100	5355	97.4094	27.375	108.435	1.14063	0.91468	0.85714
	Lysotracker	Distal	PARGi	FUS	FUS D3 Lyso PARGi.tif Lyso.csv	0.64524	1.46385	0.15612	0.53943	0.3685	45	1	39.8114	100	765	62.05	29.4281	45	0.45625	0.68313	0.85714
	Lysotracker	Distal	PARGi	FUS	FUS D3 Lyso PARGi.tif Lyso.csv	0.94058	1.80907	0.31225	0.84807	0.46879	0	0.91631	79.6228	100	1530	110.184	29.2	165.964	0.45625	0.55277	0.85714
	Lysotracker	Distal	PARGi	FUS	FUS D3 Lyso PARGi.tif Lyso.csv	1.22849	1.31218	0.67653	1.06315	0.81022	78.6901	0.92163	172.516	100	3315	86.4594	30.7969	68.1986	0.9125	0.76209	0.8125
	Lysotracker	Distal	PARGi	FUS	FUS D3 Lyso PARGi.tif Lyso.csv	0.64524	1.46385	0.15612	0.53943	0.3685	45	1	39.8114	100	765	48.5906	30.5688	45	0.45625	0.68313	0.85714
	Lysotracker	Distal	PARGi	FUS	FUS D3 Lyso PARGi.tif Lyso.csv	0.82252	2	0.20816	0.72807	0.36403	18.435	1	53.0819	100	1020	54.5219	30.5688	33.6901	0.45625	0.5	0.8
	Lysotracker	Distal	PARGi	FUS	FUS D3 Lyso PARGi.tif Lyso.csv	1.33019	1.28675	0.78062	1.13089	0.87887	26.565	0.94248	199.057	100	3825	49.0469	31.4812	30.9638	0.96785	0.77715	0.78947
	Lysotracker	Distal	PARGi	FUS	FUS D3 Lyso PARGi.tif Lyso.csv	1.02021	1.23565	0.52041	0.90485	0.73229	0	1	132.705	100	2550	77.5625	31.9375	153.435	0.68438	0.80929	0.90909
	Lysotracker	Distal	PARGi	FUS	FUS D3 Lyso PARGi.tif Lyso.csv	1.14063	1.12451	0.72857	1.02135	0.90826	180	1	185.786	100	3570	26.0063	32.3937	126.87	0.9125	0.88927	0.93333
	Lysotracker	Distal	PARGi	FUS	FUS D3 Lyso PARGi.tif Lyso.csv	1.9491	1.7774	1.56123	1.87967	1.05754	179.38	0.87744	398.114	100	7650	69.5781	33.3062	20.556	1.14063	0.56262	0.85714
	Lysotracker	Distal	PARGi	FUS	FUS D3 Lyso PARGi.tif Lyso.csv	1.02021	1.23565	0.52041	0.90485	0.73229	0	1	132.705	100	2550	75.9656	32.6219	153.435	0.68438	0.80929	0.90909
	Lysotracker	Distal	PARGi	FUS	FUS D3 Lyso PARGi.tif Lyso.csv	0.82252	1.29099	0.31225	0.71642	0.55493	45	1	79.6228	100	1530	85.775	33.0781	33.6901	0.64524	0.7746	0.8
	Lysotracker	Distal	PARGi	FUS	FUS D3 Lyso PARGi.tif Lyso.csv	1.29047	1.31898	0.72857	1.10614	0.83863	45.0002	1	185.786	100	3570	55.6625	33.5344	45	0.9125	0.75816	0.93333
	Lysotracker	Distal	PARGi	FUS	FUS D3 Lyso PARGi.tif Lyso.csv	1.02021	1.93571	0.36429	0.94754	0.48951	98.3496	0.94327	92.8932	100	1785	61.3656	32.6219	116.565	0.45625	0.51661	0.93333
	Lysotracker	Distal	PARGi	FUS	FUS D3 Lyso PARGi.tif Lyso.csv	1.33019	2	0.62449	1.26105	0.63053	101.31	0.88261	159.246	100	3060	89.6531	32.6219	120.964	0.68438	0.5	0.88889
	Lysotracker	Distal	PARGi	FUS	FUS D3 Lyso PARGi.tif Lyso.csv	1.33019	1.26316	0.8847	1.19284	0.94433	15.1716	1	225.598	100	4335	1.36875	33.7625	30.9638	0.9125	0.79166	0.91892
	Lysotracker	Distal	PARGi	FUS	FUS D3 Lyso PARGi.tif Lyso.csv	1.33019	1	1.09286	1.17961	1.17961	0	1	278.68	100	5355	44.0281	32.85	120.964	1.14063	1	0.91304
	Lysotracker	Distal	PARGi	FUS	FUS D3 Lyso PARGi.tif Lyso.csv	0.64524	1.46385	0.15612	0.53943	0.3685	45	1	39.8114	100	765	80.0719	33.3062	45	0.45625	0.68313	0.85714
	Lysotracker	Distal	PARGi	FUS	FUS D3 Lyso PARGi.tif Lyso.csv	1.29047	1.57454	0.62449	1.11891	0.71063	45	0.96737	159.246	100	3060	73.6844	33.9906	45	0.9125	0.63511	0.85714
	Lysotracker	Distal	PARGi	FUS	FUS D3 Lyso PARGi.tif Lyso.csv	0.82252	1.29099	0.31225	0.71642	0.55493	45	1	79.6228	100	1530	36.7281	33.9906	33.6901	0.64524	0.7746	0.8
	Lysotracker	Distal	PARGi	FUS	FUS D3 Lyso PARGi.tif Lyso.csv	1.22849	1.07649	0.83266	1.0683	0.99239	29.2326	1	212.327	100	4080	53.3813	33.7625	158.199	1.12257	0.92894	0.82051
	Lysotracker	Distal	PARGi	FUS	FUS D3 Lyso PARGi.tif Lyso.csv	0.82252	1.55299	0.26021	0.71729	0.46188	18.435	1	66.3523	100	1275	10.95	34.2188	33.6901	0.45625	0.64392	0.90909
	Lysotracker	Distal	PARGi	FUS	FUS D3 Lyso PARGi.tif Lyso.csv	1.14063	1.45045	0.57245	1.0282	0.70888	48.9717	0.97622	145.975	100	2805	13.2312	34.4469	36.8699	0.80654	0.68944	0.84615
	Lysotracker	Distal	PARGi	FUS	FUS D3 Lyso PARGi.tif Lyso.csv	0.64524	1.46385	0.15612	0.53943	0.3685	45	1	39.8114	100	765	19.6187	34.4469	45	0.45625	0.68313	0.85714
	Lysotracker	Distal	PARGi	FUS	FUS D3 Lyso PARGi.tif Lyso.csv	1.53031	1.21595	1.09286	1.30076	1.06974	22.632	1	278.68	100	5355	48.8188	34.9031	26.565	1.14063	0.8224	0.84
	Lysotracker	Distal	PARGi	FUS	FUS D3 Lyso PARGi.tif Lyso.csv	1.44279	1.85096	0.72857	1.31036	0.70794	173.953	0.83846	185.786	100	3570	62.9625	33.9906	161.565	0.68438	0.54026	0.90323
	Lysotracker	Distal	PARGi	FUS	FUS D3 Lyso PARGi.tif Lyso.csv	0.82252	1.55299	0.26021	0.71729	0.46188	71.565	1	66.3523	100	1275	44.0281	88.9688	56.3099	0.45625	0.64392	0.90909
	Lysotracker	Distal	PARGi	FUS	FUS D4 Lyso PARGi.tif Lyso.csv	0.96785	1	0.46837	0.77223	0.77223	0	1	119.434	100	2295	90.5656	23.9531	135	0.68438	1	1
	Lysotracker	Distal	PARGi	FUS	FUS D4 Lyso PARGi.tif Lyso.csv	3.04357	2.27581	3.1745	3.03292	1.33268	175.008	0.72007	809.498	100	15555	75.5094	24.6375	167.005	1.59688	0.4394	0.83562
	Lysotracker	Distal	PARGi	FUS	FUS D4 Lyso PARGi.tif Lyso.csv	1.8392	1.64719	1.40511	1.71665	1.04217	169.338	0.96737	358.303	100	6885	80.3	24.4094	150.255	1.14063	0.6071	0.88525
	Lysotracker	Distal	PARGi	FUS	FUS D4 Lyso PARGi.tif Lyso.csv	2.67014	2.26232	2.28981	2.56821	1.13521	79.0816	0.64789	583.9	100	11220	57.4875	27.375	70.0169	1.36875	0.44202	0.79279
	Lysotracker	Distal	PARGi	FUS	FUS D4 Lyso PARGi.tif Lyso.csv	1.53031	1.41669	1.09286	1.40403	0.99106	176.386	0.97104	278.68	100	5355	49.0469	25.55	153.435	0.9125	0.70587	0.93333
	Lysotracker	Distal	PARGi	FUS	FUS D4 Lyso PARGi.tif Lyso.csv	1.33019	1.30715	0.8847	1.21343	0.9283	171.412	0.98486	225.598	100	4335	90.5656	25.7781	149.036	1.0825	0.76502	0.80952
	Lysotracker	Distal	PARGi	FUS	FUS D4 Lyso PARGi.tif Lyso.csv	3.48218	2.3574	4.11124	3.51284	1.49013	130.454	0.64894	1048.37	100	20145	71.6313	25.7781	121.608	1.80383	0.4242	0.78218
	Lysotracker	Distal	PARGi	FUS	FUS D4 Lyso PARGi.tif Lyso.csv	1.22849	1.77217	0.57245	1.13652	0.64131	166.717	0.97622	145.975	100	2805	93.3031	26.0063	158.199	0.68438	0.56428	0.84615
	Lysotracker	Distal	PARGi	FUS	FUS D4 Lyso PARGi.tif Lyso.csv	0.96785	1.22859	0.41633	0.80701	0.65686	45.0002	1	106.164	100	2040	98.55	26.4625	45	0.68438	0.81394	0.94118
	Lysotracker	Distal	PARGi	FUS	FUS D4 Lyso PARGi.tif Lyso.csv	0.72139	1.4676	0.20816	0.62368	0.42497	90	0.85737	53.0819	100	1020	3.19375	26.0063	108.435	0.45625	0.68139	0.8
	Lysotracker	Distal	PARGi	FUS	FUS D4 Lyso PARGi.tif Lyso.csv	2.16418	1.51864	1.92552	1.92955	1.27058	5.58998	0.88119	491.007	100	9435	13.6875	27.1469	18.435	1.36875	0.65849	0.85057
	Lysotracker	Distal	PARGi	FUS	FUS D4 Lyso PARGi.tif Lyso.csv	1.46071	1.44806	0.78062	1.19968	0.82848	120.473	0.89835	199.057	100	3825	55.2063	26.0063	128.66	0.9125	0.69058	0.88235
	Lysotracker	Distal	PARGi	FUS	FUS D4 Lyso PARGi.tif Lyso.csv	1.33019	1.14131	0.78062	1.06506	0.93319	30.2111	0.67362	199.057	100	3825	20.5312	27.375	30.9638	1.12916	0.87619	0.75
	Lysotracker	Distal	PARGi	FUS	FUS D4 Lyso PARGi.tif Lyso.csv	0.82252	2.70203	0.15612	0.73288	0.27123	61.845	0.64303	39.8114	100	765	46.5375	26.9187	56.3099	0.40831	0.37009	0.66667
	Lysotracker	Distal	PARGi	FUS	FUS D4 Lyso PARGi.tif Lyso.csv	0.82252	1.29099	0.31225	0.71642	0.55493	135	1	79.6228	100	1530	83.95	26.2344	123.69	0.64524	0.7746	0.8
	Lysotracker	Distal	PARGi	FUS	FUS D4 Lyso PARGi.tif Lyso.csv	2.46755	1.75828	2.28981	2.26411	1.28769	90.0648	0.51939	583.9	100	11220	49.9594	28.7437	56.3099	1.59688	0.56874	0.7395
	Lysotracker	Distal	PARGi	FUS	FUS D4 Lyso PARGi.tif Lyso.csv	0.82252	2.70203	0.15612	0.73288	0.27123	28.155	0.75398	39.8114	100	765	52.0125	26.9187	33.6901	0.40831	0.37009	0.66667
	Lysotracker	Distal	PARGi	FUS	FUS D4 Lyso PARGi.tif Lyso.csv	1.46071	1.49549	0.83266	1.25916	0.84197	28.8418	0.71853	212.327	100	4080	12.3187	27.8313	38.6598	1.02078	0.66868	0.8
	Lysotracker	Distal	PARGi	FUS	FUS D4 Lyso PARGi.tif Lyso.csv	2.16418	2.62163	1.30103	2.08393	0.7949	9.58382	0.55467	331.762	100	6375	28.5156	27.8313	18.435	0.9125	0.38144	0.79365
	Lysotracker	Distal	PARGi	FUS	FUS D4 Lyso PARGi.tif Lyso.csv	1.78171	1.49995	1.30103	1.57629	1.0509	30.2539	0.98055	331.762	100	6375	80.3	28.0594	39.8056	1.14063	0.66669	0.92593
	Lysotracker	Distal	PARGi	FUS	FUS D4 Lyso PARGi.tif Lyso.csv	1.64503	1.47337	1.19694	1.49847	1.01703	56.6944	1	305.221	100	5865	16.1969	28.7437	56.3099	1.12916	0.67871	0.90196
	Lysotracker	Distal	PARGi	FUS	FUS D4 Lyso PARGi.tif Lyso.csv	0.82252	1.29099	0.31225	0.71642	0.55493	135	1	79.6228	100	1530	39.4656	27.375	123.69	0.64524	0.7746	0.8
	Lysotracker	Distal	PARGi	FUS	FUS D4 Lyso PARGi.tif Lyso.csv	0.64524	1.46385	0.15612	0.53943	0.3685	135	1	39.8114	100	765	24.6375	27.6031	135	0.45625	0.68313	0.85714
	Lysotracker	Distal	PARGi	FUS	FUS D4 Lyso PARGi.tif Lyso.csv	0.82252	2.03127	0.20816	0.73374	0.36122	31.7175	1	53.0819	100	1020	82.3531	28.9719	33.6901	0.45625	0.4923	0.8
	Lysotracker	Distal	PARGi	FUS	FUS D4 Lyso PARGi.tif Lyso.csv	1.44279	1.75376	0.83266	1.36356	0.7775	177.556	0.92693	212.327	100	4080	74.3688	28.9719	161.565	0.9125	0.5702	0.8
	Lysotracker	Distal	PARGi	FUS	FUS D4 Lyso PARGi.tif Lyso.csv	2.66037	1.17443	3.1745	2.17875	1.85515	68.8407	0.83029	809.498	100	15555	22.1281	31.4812	59.0362	1.825	0.85148	0.88406
	Lysotracker	Distal	PARGi	FUS	FUS D4 Lyso PARGi.tif Lyso.csv	0.64524	1.46385	0.15612	0.53943	0.3685	135	1	39.8114	100	765	52.0125	29.6562	135	0.45625	0.68313	0.85714
	Lysotracker	Distal	PARGi	FUS	FUS D4 Lyso PARGi.tif Lyso.csv	1.46071	1.136	1.04082	1.22697	1.08007	7.38022	0.9942	265.409	100	5100	85.5469	31.2531	38.6598	1.14063	0.88028	0.88889
	Lysotracker	Distal	PARGi	FUS	FUS D4 Lyso PARGi.tif Lyso.csv	1.14063	1.7669	0.41633	0.96779	0.54773	66.8014	0.8202	106.164	100	2040	26.0063	31.7094	53.1301	0.68438	0.56596	0.84211
	Lysotracker	Distal	PARGi	FUS	FUS D4 Lyso PARGi.tif Lyso.csv	1.02021	1.24108	0.52041	0.90683	0.73068	45.0002	0.98175	132.705	100	2550	55.2063	31.4812	26.565	0.80654	0.80575	0.8
	Lysotracker	Distal	PARGi	FUS	FUS D4 Lyso PARGi.tif Lyso.csv	1.02021	1.41576	0.41633	0.8663	0.6119	7.01812	0.91441	106.164	100	2040	60.225	31.9375	26.565	0.68438	0.70633	0.8
	Lysotracker	Distal	PARGi	FUS	FUS D4 Lyso PARGi.tif Lyso.csv	1.22849	1.13402	0.78062	1.06165	0.93619	90	0.869	199.057	100	3825	8.44063	31.7094	111.801	1.12257	0.88182	0.78947
	Lysotracker	Distal	PARGi	FUS	FUS D4 Lyso PARGi.tif Lyso.csv	1.14063	1.14747	0.57245	0.91453	0.79699	39.6902	0.97622	145.975	100	2805	19.3906	32.6219	53.1301	0.9125	0.87148	0.81481
	Lysotracker	Distal	PARGi	FUS	FUS D4 Lyso PARGi.tif Lyso.csv	1.8392	1.59664	1.30103	1.62631	1.01858	65.4752	0.82144	331.762	100	6375	77.1063	81.8969	60.2551	1.14063	0.62631	0.84746
	Lysotracker	Distal	PARGi	FUS	FUS D4 Lyso PARGi.tif Lyso.csv	1.8392	1.53288	1.35307	1.62506	1.06013	29.4345	0.87589	345.032	100	6630	63.875	81.8969	29.7449	1.14063	0.65237	0.89655
	Lysotracker	Distal	PARGi	FUS	FUS D4 Lyso PARGi.tif Lyso.csv	1.02021	1.93571	0.36429	0.94754	0.48951	98.3496	0.94327	92.8932	100	1785	86.0031	81.8969	116.565	0.45625	0.51661	0.93333
	Lysotracker	Distal	PARGi	FUS	FUS D4 Lyso PARGi.tif Lyso.csv	1.22849	1.20894	0.83266	1.13212	0.93645	0	1	212.327	100	4080	59.5406	82.5813	158.199	0.9125	0.82717	0.88889
	Lysotracker	Distal	PARGi	FUS	FUS D4 Lyso PARGi.tif Lyso.csv	1.14063	1.14825	0.62449	0.95551	0.83215	61.287	0.85073	159.246	100	3060	54.5219	83.7219	36.8699	0.9125	0.87089	0.82759
	Lysotracker	Distal	PARGi	FUS	FUS D4 Lyso PARGi.tif Lyso.csv	0.64524	1	0.20816	0.51482	0.51482	0	1	53.0819	100	1020	56.575	83.0375	135	0.45625	1	1
	Lysotracker	Distal	PARGi	FUS	FUS D4 Lyso PARGi.tif Lyso.csv	1.33019	1.22037	0.93674	1.20645	0.9886	31.5861	1	238.868	100	4590	79.8438	83.95	30.9638	1.12257	0.81943	0.85714
	Lysotracker	Distal	PARGi	FUS	FUS D4 Lyso PARGi.tif Lyso.csv	0.82252	2.03127	0.20816	0.73374	0.36122	121.717	0.85737	53.0819	100	1020	71.4031	83.2656	123.69	0.45625	0.4923	0.8
	Lysotracker	Distal	PARGi	FUS	FUS D4 Lyso PARGi.tif Lyso.csv	1.02021	1.13855	0.46837	0.824	0.72372	0	0.79872	119.434	100	2295	91.4781	83.7219	153.435	0.68438	0.87831	0.81818
	Lysotracker	Distal	PARGi	FUS	FUS D4 Lyso PARGi.tif Lyso.csv	1.46071	1.10141	1.1449	1.26711	1.15044	45	1	291.95	100	5610	60.225	84.8625	38.6598	1.14063	0.90793	0.93617
	Lysotracker	Distal	PARGi	FUS	FUS D4 Lyso PARGi.tif Lyso.csv	0.82252	1.29099	0.31225	0.71642	0.55493	45	1	79.6228	100	1530	93.075	84.4063	33.6901	0.64524	0.7746	0.8
	Lysotracker	Distal	PARGi	FUS	FUS D4 Lyso PARGi.tif Lyso.csv	1.61309	1.61523	1.04082	1.46305	0.90579	8.75007	0.83842	265.409	100	5100	101.288	84.4063	171.87	0.9125	0.61911	0.85106
	Lysotracker	Distal	PARGi	FUS	FUS D4 Lyso PARGi.tif Lyso.csv	1.02021	1.41576	0.41633	0.8663	0.6119	82.9819	0.91441	106.164	100	2040	108.359	84.8625	63.435	0.68438	0.70633	0.8
	Lysotracker	Distal	PARGi	FUS	FUS D4 Lyso PARGi.tif Lyso.csv	0.82252	2.70203	0.15612	0.73288	0.27123	151.845	0.75398	39.8114	100	765	16.8813	84.1781	146.31	0.40831	0.37009	0.66667
	Lysotracker	Distal	PARGi	FUS	FUS D4 Lyso PARGi.tif Lyso.csv	0.96785	1.37971	0.36429	0.79997	0.57981	30.4727	1	92.8932	100	1785	98.7781	85.5469	45	0.68438	0.72479	0.875
	Lysotracker	Distal	PARGi	FUS	FUS D4 Lyso PARGi.tif Lyso.csv	1.02021	2.15225	0.26021	0.84442	0.39234	15.4819	0.64114	66.3523	100	1275	48.5906	85.775	26.565	0.45625	0.46463	0.71429
	Lysotracker	Distal	PARGi	FUS	FUS D4 Lyso PARGi.tif Lyso.csv	0.64524	1	0.20816	0.51482	0.51482	0	1	53.0819	100	1020	16.6531	87.8281	135	0.45625	1	1
	Lysotracker	Distal	PARGi	FUS	FUS D4 Lyso PARGi.tif Lyso.csv	0.82252	1.06885	0.36429	0.7041	0.65875	90	1	92.8932	100	1785	26.6906	87.8281	123.69	0.68438	0.93559	0.875
	Lysotracker	Distal	PARGi	FUS	FUS D4 Lyso PARGi.tif Lyso.csv	1.02021	1.38959	0.46837	0.91032	0.6551	145.427	0.88357	119.434	100	2295	11.6344	88.2844	116.565	0.80654	0.71964	0.75
	Lysotracker	Distal	PARGi	FUS	FUS D5 Lyso PARGi.tif Lyso.csv	0.82252	1.06885	0.36429	0.7041	0.65875	90	1	92.8932	100	1785	105.166	29.2	123.69	0.68438	0.93559	0.875
	Lysotracker	Distal	PARGi	FUS	FUS D5 Lyso PARGi.tif Lyso.csv	1.61309	1.09254	1.35307	1.37193	1.25573	45.0014	0.93155	345.032	100	6630	97.8656	30.7969	45	1.36875	0.9153	0.85246
	Lysotracker	Distal	PARGi	FUS	FUS D5 Lyso PARGi.tif Lyso.csv	1.73735	2.41148	0.83266	1.59893	0.66305	11.2397	0.71853	212.327	100	4080	102.428	30.3406	23.1986	0.68438	0.41468	0.86486
	Lysotracker	Distal	PARGi	FUS	FUS D5 Lyso PARGi.tif Lyso.csv	1.64503	1.79451	0.98878	1.50307	0.83759	21.1857	0.94449	252.139	100	4845	88.0563	30.7969	33.6901	0.9125	0.55725	0.90476
	Lysotracker	Distal	PARGi	FUS	FUS D5 Lyso PARGi.tif Lyso.csv	0.64524	1.46385	0.15612	0.53943	0.3685	45	1	39.8114	100	765	91.0219	30.3406	45	0.45625	0.68313	0.85714
	Lysotracker	Distal	PARGi	FUS	FUS D5 Lyso PARGi.tif Lyso.csv	1.64503	1.25797	1.1449	1.35417	1.07647	32.5742	0.92226	291.95	100	5610	59.3125	31.2531	33.6901	1.14063	0.79493	0.86275
	Lysotracker	Distal	PARGi	FUS	FUS D5 Lyso PARGi.tif Lyso.csv	1.66078	1.05994	1.50919	1.42714	1.34644	11.3099	1	384.843	100	7395	77.7906	31.2531	15.9454	1.36875	0.94345	0.86567
	Lysotracker	Distal	PARGi	FUS	FUS D5 Lyso PARGi.tif Lyso.csv	0.96785	1.22859	0.41633	0.80701	0.65686	45.0002	1	106.164	100	2040	86.2313	31.2531	45	0.68438	0.81394	0.94118
	Lysotracker	Distal	PARGi	FUS	FUS D5 Lyso PARGi.tif Lyso.csv	1.64503	2.2614	0.72857	1.44837	0.64048	23.0585	0.62872	185.786	100	3570	115.431	31.4812	33.6901	0.7946	0.4422	0.73684
	Lysotracker	Distal	PARGi	FUS	FUS D5 Lyso PARGi.tif Lyso.csv	1.53031	1.30431	1.04082	1.31472	1.00798	165.359	0.89816	265.409	100	5100	36.9563	31.2531	153.435	1.14063	0.76669	0.81633
	Lysotracker	Distal	PARGi	FUS	FUS D5 Lyso PARGi.tif Lyso.csv	1.02021	1.34027	0.46837	0.89402	0.66704	110.301	1	119.434	100	2295	99.9188	31.025	116.565	0.68438	0.74612	0.85714
	Lysotracker	Distal	PARGi	FUS	FUS D5 Lyso PARGi.tif Lyso.csv	1.14063	1.37205	0.57245	1.00002	0.72885	15.0707	1	145.975	100	2805	105.394	31.7094	36.8699	0.68438	0.72883	0.95652
	Lysotracker	Distal	PARGi	FUS	FUS D5 Lyso PARGi.tif Lyso.csv	1.46071	2.39519	0.57245	1.32128	0.55164	44.1514	0.69115	145.975	100	2805	93.9875	32.85	38.6598	0.80654	0.4175	0.6875
	Lysotracker	Distal	PARGi	FUS	FUS D5 Lyso PARGi.tif Lyso.csv	2.60103	1.21079	3.69491	2.38666	1.97117	154.263	0.93019	942.203	100	18105	70.0344	31.9375	127.875	2.05313	0.82591	0.91026
	Lysotracker	Distal	PARGi	FUS	FUS D5 Lyso PARGi.tif Lyso.csv	1.22849	1.07649	0.83266	1.0683	0.99239	29.2326	1	212.327	100	4080	80.0719	32.1656	158.199	1.12257	0.92894	0.82051
	Lysotracker	Distal	PARGi	FUS	FUS D5 Lyso PARGi.tif Lyso.csv	1.44279	1.37402	0.98878	1.31523	0.95721	10.7338	0.91631	252.139	100	4845	84.6344	32.3937	161.565	1.0825	0.72779	0.80851
	Lysotracker	Distal	PARGi	FUS	FUS D5 Lyso PARGi.tif Lyso.csv	2.92143	1.98449	2.49797	2.51231	1.26597	35.9865	0.67928	636.982	100	12240	91.0219	33.9906	38.6598	1.51911	0.50391	0.83478
	Lysotracker	Distal	PARGi	FUS	FUS D5 Lyso PARGi.tif Lyso.csv	0.82252	1.06885	0.36429	0.7041	0.65875	90	1	92.8932	100	1785	44.2563	32.3937	123.69	0.68438	0.93559	0.875
	Lysotracker	Distal	PARGi	FUS	FUS D5 Lyso PARGi.tif Lyso.csv	1.33019	1.08334	0.98878	1.16785	1.07801	83.7356	1	252.139	100	4845	94.6719	32.85	120.964	1.14063	0.92307	0.88372
	Lysotracker	Distal	PARGi	FUS	FUS D5 Lyso PARGi.tif Lyso.csv	5.12647	3.12193	5.2041	4.5482	1.45685	13.7908	0.44142	1327.05	100	25500	76.65	34.9031	20.8545	1.93009	0.32031	0.74349
	Lysotracker	Distal	PARGi	FUS	FUS D5 Lyso PARGi.tif Lyso.csv	1.46071	1.57946	0.8847	1.33385	0.8445	16.845	0.91096	225.598	100	4335	88.5125	33.9906	38.6598	0.9125	0.63313	0.85
	Lysotracker	Distal	PARGi	FUS	FUS D5 Lyso PARGi.tif Lyso.csv	0.82252	1.55299	0.26021	0.71729	0.46188	108.435	1	66.3523	100	1275	3.65	33.3062	123.69	0.45625	0.64392	0.90909
	Lysotracker	Distal	PARGi	FUS	FUS D5 Lyso PARGi.tif Lyso.csv	1.14063	1.79055	0.41633	0.97424	0.5441	33.0188	0.91441	106.164	100	2040	74.5969	33.9906	36.8699	0.68438	0.55849	0.8
	Lysotracker	Distal	PARGi	FUS	FUS D5 Lyso PARGi.tif Lyso.csv	1.02021	1.38403	0.52041	0.95764	0.69192	180	1	132.705	100	2550	86.2313	33.5344	153.435	0.68438	0.72253	0.90909
	Lysotracker	Distal	PARGi	FUS	FUS D5 Lyso PARGi.tif Lyso.csv	1.33019	1.60396	0.72857	1.2198	0.76049	151.055	0.99252	185.786	100	3570	0	34.2188	149.036	0.9125	0.62346	0.84848
	Lysotracker	Distal	PARGi	FUS	FUS D5 Lyso PARGi.tif Lyso.csv	0.72139	1.4676	0.20816	0.62368	0.42497	90	0.85737	53.0819	100	1020	24.8656	33.9906	108.435	0.45625	0.68139	0.8
	Lysotracker	Distal	PARGi	FUS	FUS D5 Lyso PARGi.tif Lyso.csv	2.60103	1.50757	2.65409	2.25711	1.49718	123.954	0.88105	676.794	100	13005	90.3375	33.9906	127.875	1.73504	0.66332	0.90265
	Lysotracker	Distal	PARGi	FUS	FUS D5 Lyso PARGi.tif Lyso.csv	0.82252	2.03127	0.20816	0.73374	0.36122	58.2825	0.85737	53.0819	100	1020	2.28125	34.9031	56.3099	0.45625	0.4923	0.8
	Lysotracker	Distal	PARGi	FUS	FUS D5 Lyso PARGi.tif Lyso.csv	1.14063	1.34307	0.57245	0.9894	0.73667	45	0.97622	145.975	100	2805	16.1969	35.1313	36.8699	0.9125	0.74456	0.81481
	Lysotracker	Distal	PARGi	FUS	FUS D5 Lyso PARGi.tif Lyso.csv	1.33019	1.24825	0.93674	1.22016	0.97749	0	1	238.868	100	4590	5.475	34.4469	149.036	0.9125	0.80112	0.94737
	Lysotracker	Distal	PARGi	FUS	FUS D5 Lyso PARGi.tif Lyso.csv	2.16418	1.18881	2.49797	1.94449	1.63566	27.2385	0.90625	636.982	100	12240	36.2719	36.0438	18.435	1.73504	0.84118	0.86486
	Lysotracker	Distal	PARGi	FUS	FUS D5 Lyso PARGi.tif Lyso.csv	0.64524	1	0.20816	0.51482	0.51482	0	1	53.0819	100	1020	17.3375	34.9031	135	0.45625	1	1
	Lysotracker	Distal	PARGi	FUS	FUS D5 Lyso PARGi.tif Lyso.csv	1.66078	1.37715	1.24898	1.47987	1.07459	176.883	0.72579	318.491	100	6120	45.1688	35.8156	164.055	1.36875	0.72614	0.7619
	Lysotracker	Distal	PARGi	FUS	FUS D5 Lyso PARGi.tif Lyso.csv	1.33019	1.23439	0.83266	1.14397	0.92675	27.9903	1	212.327	100	4080	49.275	36.0438	30.9638	0.9125	0.81012	0.88889
	Lysotracker	Distal	PARGi	FUS	FUS D5 Lyso PARGi.tif Lyso.csv	1.46071	1.56808	0.83266	1.28935	0.82225	31.9606	1	212.327	100	4080	59.5406	36.2719	38.6598	0.9125	0.63772	0.91429
	Lysotracker	Distal	PARGi	FUS	FUS D5 Lyso PARGi.tif Lyso.csv	0.94058	1.19523	0.41633	0.79597	0.66596	0	1	106.164	100	2040	96.2688	35.8156	165.964	0.68438	0.83666	0.8
	Lysotracker	Distal	PARGi	FUS	FUS D5 Lyso PARGi.tif Lyso.csv	1.22849	1.64435	0.62449	1.14345	0.69538	3.20939	0.78054	159.246	100	3060	2.7375	36.0438	158.199	0.68438	0.60814	0.85714
	Lysotracker	Distal	PARGi	FUS	FUS D5 Lyso PARGi.tif Lyso.csv	1.73735	1.37868	1.45715	1.59933	1.16005	4.01729	1	371.573	100	7140	98.7781	36.7281	23.1986	1.14063	0.72533	0.88889
	Lysotracker	Distal	PARGi	FUS	FUS D5 Lyso PARGi.tif Lyso.csv	1.88117	1.47963	1.35307	1.59658	1.07904	8.44494	0.61921	345.032	100	6630	56.3469	36.2719	165.964	1.14063	0.67584	0.77612
	Lysotracker	Distal	PARGi	FUS	FUS D5 Lyso PARGi.tif Lyso.csv	1.66078	1.4683	1.09286	1.42937	0.97349	65.534	0.80177	278.68	100	5355	8.44063	38.5531	74.0546	1.12257	0.68106	0.80769
	Lysotracker	Distal	PARGi	FUS	FUS D5 Lyso PARGi.tif Lyso.csv	1.14063	1.32675	0.52041	0.93761	0.7067	47.7462	0.88747	132.705	100	2550	63.1906	86.6875	53.1301	0.80654	0.75372	0.8
	Lysotracker	Distal	PARGi	FUS	FUS D5 Lyso PARGi.tif Lyso.csv	2.82175	2.30144	2.39389	2.64854	1.15082	5.16163	0.62612	610.441	100	11730	64.3313	88.9688	14.0362	1.32368	0.43451	0.82143
	Lysotracker	Distal	PARGi	FUS	FUS D5 Lyso PARGi.tif Lyso.csv	2.16418	1.99018	1.71735	2.08608	1.04819	2.23551	0.80279	437.925	100	8415	75.9656	88.5125	18.435	1.14063	0.50247	0.85714
	Lysotracker	Distal	PARGi	FUS	FUS D5 Lyso PARGi.tif Lyso.csv	1.14063	1.12451	0.72857	1.02135	0.90826	180	1	185.786	100	3570	71.8594	87.8281	126.87	0.9125	0.88927	0.93333
	Lysotracker	Distal	PARGi	FUS	FUS D5 Lyso PARGi.tif Lyso.csv	1.53031	1.44266	0.83266	1.23672	0.85725	57.2836	0.52572	212.327	100	4080	67.0688	89.425	63.435	1.14063	0.69316	0.65306
	Lysotracker	Distal	PARGi	FUS	FUS D5 Lyso PARGi.tif Lyso.csv	1.46071	1.00802	1.19694	1.23944	1.22958	0	1	305.221	100	5865	50.8719	90.3375	128.66	1.14063	0.99205	0.95833
	Lysotracker	Distal	PARGi to distal	FUS	FUS D1 Lyso PARGi to distal.tif Lyso.csv	1.46071	2.68484	0.41633	1.19298	0.44434	33.9453	0.50265	106.164	100	2040	112.922	26.4625	38.6598	0.64524	0.37246	0.64
	Lysotracker	Distal	PARGi to distal	FUS	FUS D1 Lyso PARGi to distal.tif Lyso.csv	1.9491	2.99271	0.72857	1.66619	0.55675	6.9493	0.46	185.786	100	3570	114.063	26.4625	20.556	0.68438	0.33415	0.66667
	Lysotracker	Distal	PARGi to distal	FUS	FUS D1 Lyso PARGi to distal.tif Lyso.csv	1.22849	1.07649	0.83266	1.0683	0.99239	60.7674	0.92693	212.327	100	4080	57.9438	26.9187	111.801	1.12257	0.92894	0.82051
	Lysotracker	Distal	PARGi to distal	FUS	FUS D1 Lyso PARGi to distal.tif Lyso.csv	1.14063	3.84988	0.20816	1.01014	0.26238	143.909	0.51291	53.0819	100	1020	13.0031	27.8313	143.13	0.44426	0.25975	0.57143
	Lysotracker	Distal	PARGi to distal	FUS	FUS D1 Lyso PARGi to distal.tif Lyso.csv	1.66078	1.44706	1.09286	1.41899	0.98061	98.5451	0.65046	278.68	100	5355	6.61563	28.2875	105.945	1.14063	0.69106	0.77778
	Lysotracker	Distal	PARGi to distal	FUS	FUS D1 Lyso PARGi to distal.tif Lyso.csv	0.64524	1.46385	0.15612	0.53943	0.3685	45	1	39.8114	100	765	49.275	29.8844	45	0.45625	0.68313	0.85714
	Lysotracker	Distal	PARGi to distal	FUS	FUS D1 Lyso PARGi to distal.tif Lyso.csv	0.82252	1.55299	0.26021	0.71729	0.46188	161.565	1	66.3523	100	1275	74.5969	29.6562	146.31	0.45625	0.64392	0.90909
	Lysotracker	Distal	PARGi to distal	FUS	FUS D1 Lyso PARGi to distal.tif Lyso.csv	1.02021	1.23565	0.52041	0.90485	0.73229	90	1	132.705	100	2550	106.078	30.1125	116.565	0.68438	0.80929	0.90909
	Lysotracker	Distal	PARGi to distal	FUS	FUS D1 Lyso PARGi to distal.tif Lyso.csv	1.02021	1.55994	0.26021	0.7189	0.46085	155.301	0.44373	66.3523	100	1275	24.1812	51.1	153.435	0.68438	0.64105	0.55556
	Lysotracker	Distal	PARGi to distal	FUS	FUS D1 Lyso PARGi to distal.tif Lyso.csv	0.82252	2.03127	0.20816	0.73374	0.36122	31.7175	1	53.0819	100	1020	108.816	83.0375	33.6901	0.45625	0.4923	0.8
	Lysotracker	Distal	PARGi to distal	FUS	FUS D1 Lyso PARGi to distal.tif Lyso.csv	0.82252	1.55299	0.26021	0.71729	0.46188	18.435	1	66.3523	100	1275	107.675	85.775	33.6901	0.45625	0.64392	0.90909
	Lysotracker	Distal	PARGi to distal	FUS	FUS D1 Lyso PARGi to distal.tif Lyso.csv	1.22849	1.62185	0.67653	1.18196	0.72878	0	1	172.516	100	3315	101.059	85.5469	158.199	0.68438	0.61658	0.92857
	Lysotracker	Distal	PARGi to distal	FUS	FUS D1 Lyso PARGi to distal.tif Lyso.csv	1.02021	1.23565	0.52041	0.90485	0.73229	0	1	132.705	100	2550	108.588	86.0031	153.435	0.68438	0.80929	0.90909
	Lysotracker	Distal	PARGi to distal	FUS	FUS D1 Lyso PARGi to distal.tif Lyso.csv	1.33019	2.14691	0.52041	1.19271	0.55555	76.3919	0.73551	132.705	100	2550	0	87.8281	59.0362	0.68438	0.46579	0.83333
	Lysotracker	Distal	PARGi to distal	FUS	FUS D1 Lyso PARGi to distal.tif Lyso.csv	1.14063	1.84951	0.41633	0.99015	0.53536	152.296	0.70997	106.164	100	2040	67.0688	86.6875	143.13	0.68438	0.54068	0.7619
	Lysotracker	Distal	PARGi to distal	FUS	FUS D1 Lyso PARGi to distal.tif Lyso.csv	1.02021	1.41576	0.41633	0.8663	0.6119	7.01812	0.91441	106.164	100	2040	73	88.0563	26.565	0.68438	0.70633	0.8
	Lysotracker	Distal	PARGi to distal	FUS	FUS D1 Lyso PARGi to distal.tif Lyso.csv	0.82252	1.49607	0.26021	0.70403	0.47058	55.9007	0.87266	66.3523	100	1275	83.2656	88.9688	33.6901	0.61247	0.66842	0.71429
	Lysotracker	Distal	PARGi to distal	FUS	FUS D2 Lyso PARGi to distal.tif Lyso.csv	0.72139	1.5667	0.15612	0.55806	0.3562	0	0.5236	39.8114	100	765	5.70313	26.6906	161.565	0.45625	0.63828	0.6
	Lysotracker	Distal	PARGi to distal	FUS	FUS D2 Lyso PARGi to distal.tif Lyso.csv	2.04041	1.22717	2.13368	1.82588	1.48788	85.9281	0.86648	544.089	100	10455	58.4	30.3406	63.435	1.70934	0.81488	0.83673
	Lysotracker	Distal	PARGi to distal	FUS	FUS D2 Lyso PARGi to distal.tif Lyso.csv	1.16321	2.64546	0.26021	0.93619	0.35389	83.5979	0.40307	66.3523	100	1275	1.14063	30.5688	101.31	0.45625	0.37801	0.58824
	Lysotracker	Distal	PARGi to distal	FUS	FUS D2 Lyso PARGi to distal.tif Lyso.csv	0.64524	1	0.20816	0.51482	0.51482	0	1	53.0819	100	1020	44.4844	30.5688	135	0.45625	1	1
	Lysotracker	Distal	PARGi to distal	FUS	FUS D2 Lyso PARGi to distal.tif Lyso.csv	2.24677	1.95366	1.40511	1.86954	0.95694	11.4579	0.64303	358.303	100	6885	45.3969	31.7094	23.9625	1.14063	0.51186	0.79412
	Lysotracker	Distal	PARGi to distal	FUS	FUS D2 Lyso PARGi to distal.tif Lyso.csv	0.82252	2.70203	0.15612	0.73288	0.27123	61.845	0.64303	39.8114	100	765	44.9406	31.4812	56.3099	0.40831	0.37009	0.66667
	Lysotracker	Distal	PARGi to distal	FUS	FUS D2 Lyso PARGi to distal.tif Lyso.csv	0.64524	1.46385	0.15612	0.53943	0.3685	135	1	39.8114	100	765	52.925	30.7969	135	0.45625	0.68313	0.85714
	Lysotracker	Distal	PARGi to distal	FUS	FUS D2 Lyso PARGi to distal.tif Lyso.csv	1.66078	1.49825	1.1449	1.47785	0.98639	104.802	0.59495	291.95	100	5610	63.875	31.2531	105.945	1.14063	0.66745	0.75862
	Lysotracker	Distal	PARGi to distal	FUS	FUS D2 Lyso PARGi to distal.tif Lyso.csv	2.10321	1.09007	2.23776	1.76234	1.61672	123.083	0.65935	570.63	100	10965	19.3906	31.7094	130.601	1.7744	0.91737	0.78182
	Lysotracker	Distal	PARGi to distal	FUS	FUS D2 Lyso PARGi to distal.tif Lyso.csv	1.53031	1.36858	0.8847	1.24162	0.90723	163.155	0.64906	225.598	100	4335	75.0531	31.7094	153.435	1.14063	0.73068	0.73913
	Lysotracker	Distal	PARGi to distal	FUS	FUS D2 Lyso PARGi to distal.tif Lyso.csv	0.96785	1.80907	0.31225	0.84807	0.46879	36.8699	1	79.6228	100	1530	78.2469	32.3937	45	0.61247	0.55277	0.8
	Lysotracker	Distal	PARGi to distal	FUS	FUS D2 Lyso PARGi to distal.tif Lyso.csv	1.02021	1.48549	0.31225	0.76849	0.51733	87.6182	0.48369	79.6228	100	1530	63.1906	32.6219	116.565	0.68438	0.67318	0.63158
	Lysotracker	Distal	PARGi to distal	FUS	FUS D2 Lyso PARGi to distal.tif Lyso.csv	1.66078	1.10442	1.40511	1.40565	1.27275	25.344	0.59904	358.303	100	6885	89.425	33.5344	15.9454	1.36875	0.90545	0.77143
	Lysotracker	Distal	PARGi to distal	FUS	FUS D2 Lyso PARGi to distal.tif Lyso.csv	1.02021	1.64978	0.31225	0.80987	0.4909	120.779	0.68581	79.6228	100	1530	42.2031	42.6594	116.565	0.64524	0.60614	0.66667
	Lysotracker	Distal	PARGi to distal	FUS	FUS D2 Lyso PARGi to distal.tif Lyso.csv	1.14063	1.33333	0.62449	1.02965	0.77223	0	1	159.246	100	3060	49.5031	87.8281	143.13	0.68438	0.75	1
	Lysotracker	Distal	PARGi to distal	FUS	FUS D2 Lyso PARGi to distal.tif Lyso.csv	1.02021	2.08167	0.31225	0.90972	0.43702	71.565	0.80852	79.6228	100	1530	10.7219	90.3375	63.435	0.45625	0.48038	0.85714
	Lysotracker	Distal	PARGi to distal	FUS	FUS D2 Lyso PARGi to distal.tif Lyso.csv	2.67014	1.50889	2.65409	2.25809	1.49653	3.72865	0.68322	676.794	100	13005	30.5688	95.3563	19.9831	1.59688	0.66274	0.82258
	Lysotracker	Distal	PARGi to distal	FUS	FUS D3 Lyso PARGi to distal.tif Lyso.csv	0.96785	1.72674	0.26021	0.75636	0.43803	45.0001	0.67377	66.3523	100	1275	26.0063	82.5813	45	0.64524	0.57912	0.71429
	Lysotracker	Distal	PARGi to distal	FUS	FUS D3 Lyso PARGi to distal.tif Lyso.csv	1.78171	1.20255	1.35307	1.43935	1.19692	61.6217	0.74296	345.032	100	6630	9.35313	88.7406	39.8056	1.36875	0.83157	0.78788
	Lysotracker	Distal	PARGi to distal	FUS	FUS D3 Lyso PARGi to distal.tif Lyso.csv	1.02021	2.15322	0.31225	0.92523	0.42969	161.565	0.76937	79.6228	100	1530	38.5531	87.6	153.435	0.57744	0.46442	0.66667
	Lysotracker	Distal	PARGi to distal	FUS	FUS D3 Lyso PARGi to distal.tif Lyso.csv	1.78171	1.25335	1.19694	1.38207	1.10269	128.041	0.82406	305.221	100	5865	102.2	87.3719	129.806	1.14063	0.79786	0.86792
	Lysotracker	Distal	PARGi to distal	FUS	FUS D3 Lyso PARGi to distal.tif Lyso.csv	0.82252	1.55299	0.26021	0.71729	0.46188	161.565	1	66.3523	100	1275	39.6938	87.6	146.31	0.45625	0.64392	0.90909
	Lysotracker	Distal	PARGi to distal	FUS	FUS D3 Lyso PARGi to distal.tif Lyso.csv	0.72139	1.5667	0.15612	0.55806	0.3562	0	0.5236	39.8114	100	765	77.7906	87.8281	161.565	0.45625	0.63828	0.6
	Lysotracker	Distal	PARGi to distal	FUS	FUS D3 Lyso PARGi to distal.tif Lyso.csv	1.64503	1.85472	0.72857	1.31169	0.70722	17.0635	0.62872	185.786	100	3570	23.2688	88.9688	33.6901	0.88539	0.53917	0.73684
	Lysotracker	Distal	PARGi to distal	FUS	FUS D3 Lyso PARGi to distal.tif Lyso.csv	2.60103	2.30552	2.13368	2.50267	1.08552	0.36117	0.58978	544.089	100	10455	66.3844	88.0563	164.745	1.36875	0.43374	0.78846
	Lysotracker	Distal	PARGi to distal	FUS	FUS D3 Lyso PARGi to distal.tif Lyso.csv	1.46071	1.16237	1.09286	1.27177	1.09412	130.388	0.94307	278.68	100	5355	69.5781	88.5125	128.66	1.14063	0.86031	0.84
	Lysotracker	Distal	PARGi to distal	FUS	FUS D3 Lyso PARGi to distal.tif Lyso.csv	1.78171	1.25915	1.1449	1.35481	1.07597	151.517	0.62866	291.95	100	5610	90.3375	88.7406	129.806	1.21772	0.79419	0.70968
	Lysotracker	Distal	PARGi to distal	FUS	FUS D3 Lyso PARGi to distal.tif Lyso.csv	2.10321	1.50599	1.61327	1.75882	1.16788	48.6408	0.73829	411.384	100	7905	39.4656	90.7938	40.6013	1.4291	0.66401	0.79487
	Lysotracker	Distal	PARGi to distal	FUS	FUS D3 Lyso PARGi to distal.tif Lyso.csv	0.64524	1.46385	0.15612	0.53943	0.3685	45	1	39.8114	100	765	66.6125	90.1094	45	0.45625	0.68313	0.85714
	Lysotracker	Distal	PARGi to distal	FUS	FUS D4 Lyso PARGi to distal.tif Lyso.csv	1.14063	3.0534	0.26021	1.00578	0.3294	40.7346	0.64114	66.3523	100	1275	101.059	20.5312	36.8699	0.48393	0.3275	0.625
	Lysotracker	Distal	PARGi to distal	FUS	FUS D4 Lyso PARGi to distal.tif Lyso.csv	1.88117	1.71122	0.93674	1.42862	0.83486	30.5946	0.44179	238.868	100	4590	49.5031	28.2875	14.0362	1.27334	0.58438	0.57143
	Lysotracker	Distal	PARGi to distal	FUS	FUS D4 Lyso PARGi to distal.tif Lyso.csv	1.61309	1.093	1.19694	1.29063	1.18082	8.37787	0.69555	305.221	100	5865	46.9938	28.7437	45	1.36875	0.91491	0.7541
	Lysotracker	Distal	PARGi to distal	FUS	FUS D4 Lyso PARGi to distal.tif Lyso.csv	1.8392	1.36691	1.35307	1.53456	1.12265	76.6683	0.80533	345.032	100	6630	59.9969	28.9719	60.2551	1.32809	0.73158	0.76471
	Lysotracker	Distal	PARGi to distal	FUS	FUS D4 Lyso PARGi to distal.tif Lyso.csv	1.44279	1.23134	0.8847	1.17772	0.95645	111.373	0.81985	225.598	100	4335	44.4844	27.8313	108.435	1.12257	0.81212	0.77273
	Lysotracker	Distal	PARGi to distal	FUS	FUS D4 Lyso PARGi to distal.tif Lyso.csv	1.22849	1.37736	0.67653	1.08924	0.79082	13.0808	0.92163	172.516	100	3315	107.903	28.2875	158.199	0.9125	0.72603	0.8125
	Lysotracker	Distal	PARGi to distal	FUS	FUS D4 Lyso PARGi to distal.tif Lyso.csv	0.96785	1.24681	0.36429	0.76046	0.60993	146.599	0.80011	92.8932	100	1785	13.9156	28.9719	135	0.68438	0.80205	0.82353
	Lysotracker	Distal	PARGi to distal	FUS	FUS D4 Lyso PARGi to distal.tif Lyso.csv	0.64524	1.46385	0.15612	0.53943	0.3685	45	1	39.8114	100	765	67.2969	29.6562	45	0.45625	0.68313	0.85714
	Lysotracker	Distal	PARGi to distal	FUS	FUS D4 Lyso PARGi to distal.tif Lyso.csv	0.82252	1.63672	0.20816	0.65864	0.40241	165.128	0.69813	53.0819	100	1020	82.125	30.1125	146.31	0.45625	0.61098	0.72727
	Lysotracker	Distal	PARGi to distal	FUS	FUS D4 Lyso PARGi to distal.tif Lyso.csv	2.45698	1.62398	2.18572	2.1259	1.30907	14.0145	0.61844	557.359	100	10710	38.0969	36.2719	21.8014	1.36875	0.61577	0.82353
	Lysotracker	Distal	PARGi to distal	FUS	FUS D4 Lyso PARGi to distal.tif Lyso.csv	1.14063	3.0534	0.26021	1.00578	0.3294	130.735	0.5715	66.3523	100	1275	29.2	36.0438	126.87	0.48393	0.3275	0.625
	Lysotracker	Distal	PARGi to distal	FUS	FUS D4 Lyso PARGi to distal.tif Lyso.csv	1.22849	2.5216	0.36429	1.08147	0.42888	86.6055	0.49626	92.8932	100	1785	78.7031	46.9938	68.1986	0.45625	0.39657	0.73684
	Lysotracker	Distal	PARGi to distal	FUS	FUS D4 Lyso PARGi to distal.tif Lyso.csv	1.14063	1.28124	0.62449	1.00933	0.78778	57.9332	1	159.246	100	3060	43.3438	86.4594	36.8699	0.9125	0.78049	0.85714
	Lysotracker	Distal	PARGi to distal	FUS	FUS D4 Lyso PARGi to distal.tif Lyso.csv	1.33019	1.24878	0.72857	1.07631	0.86188	168.493	0.67517	185.786	100	3570	48.5906	86.2313	149.036	0.9125	0.80078	0.73684
	Lysotracker	Distal	PARGi to distal	FUS	FUS D4 Lyso PARGi to distal.tif Lyso.csv	0.72139	1.5667	0.15612	0.55806	0.3562	90	0.5236	39.8114	100	765	35.5875	86.6875	108.435	0.45625	0.63828	0.6
	Lysotracker	Distal	PARGi to distal	FUS	FUS D4 Lyso PARGi to distal.tif Lyso.csv	1.73735	1.4638	1.04082	1.39278	0.95149	166.382	0.65715	265.409	100	5100	25.7781	87.3719	156.801	1.14063	0.68315	0.74074
	Lysotracker	Distal	PARGi to distal	FUS	FUS D4 Lyso PARGi to distal.tif Lyso.csv	1.14063	1.28784	0.52041	0.92376	0.71729	26.565	1	132.705	100	2550	29.8844	88.0563	36.8699	0.68438	0.77649	0.90909
	Lysotracker	Distal	PARGi to distal	FUS	FUS D4 Lyso PARGi to distal.tif Lyso.csv	1.14063	1.28089	0.62449	1.00919	0.78789	52.7621	1	159.246	100	3060	54.9781	88.2844	36.8699	0.9125	0.78071	0.85714
	Lysotracker	Distal	PARGi to distal	FUS	FUS D4 Lyso PARGi to distal.tif Lyso.csv	1.44279	1.18044	0.8847	1.15312	0.97686	24.444	0.81985	225.598	100	4335	17.1094	88.9688	18.435	1.12916	0.84714	0.7907
	Lysotracker	Distal	PARGi to distal	FUS	FUS D5 Lyso PARGi to distal.tif Lyso.csv	4.20642	1.07617	7.70207	3.24862	3.01869	8.76025	0.62784	1964.03	100	37740	46.0813	33.9906	167.471	3.06487	0.92922	0.79784
	Lysotracker	Distal	PARGi to distal	FUS	FUS D5 Lyso PARGi to distal.tif Lyso.csv	0.82252	1.55299	0.26021	0.71729	0.46188	71.565	1	66.3523	100	1275	114.291	33.5344	56.3099	0.45625	0.64392	0.90909
	Lysotracker	Distal	PARGi to distal	FUS	FUS D5 Lyso PARGi to distal.tif Lyso.csv	1.02021	1.57118	0.36429	0.85367	0.54333	14.8724	0.80011	92.8932	100	1785	53.6094	33.7625	26.565	0.68438	0.63646	0.73684
	Lysotracker	Distal	PARGi to distal	FUS	FUS D5 Lyso PARGi to distal.tif Lyso.csv	1.9491	2.78967	0.8847	1.77267	0.63544	165.27	0.5727	225.598	100	4335	71.175	33.5344	159.444	0.9125	0.35847	0.70833
	Lysotracker	Distal	PARGi to distal	FUS	FUS D5 Lyso PARGi to distal.tif Lyso.csv	1.66078	1.38711	0.93674	1.28623	0.92728	91.999	0.57703	238.868	100	4590	104.481	33.3062	105.945	1.14063	0.72092	0.69231
	Lysotracker	Distal	PARGi to distal	FUS	FUS D5 Lyso PARGi to distal.tif Lyso.csv	1.44279	1.26675	0.93674	1.22916	0.97033	168.69	0.96454	238.868	100	4590	51.3281	33.7625	161.565	0.9125	0.78942	0.85714
	Lysotracker	Distal	PARGi to distal	FUS	FUS D5 Lyso PARGi to distal.tif Lyso.csv	1.53031	1.80109	0.83266	1.38183	0.76722	22.8537	0.79536	212.327	100	4080	60.225	34.4469	26.565	0.9125	0.55522	0.8
	Lysotracker	Distal	PARGi to distal	FUS	FUS D5 Lyso PARGi to distal.tif Lyso.csv	1.53031	1.21393	1.04082	1.26835	1.04483	152.928	0.8154	265.409	100	5100	75.7375	34.4469	153.435	1.14063	0.82377	0.8
	Lysotracker	Distal	PARGi to distal	FUS	FUS D5 Lyso PARGi to distal.tif Lyso.csv	1.22849	1.49029	0.57245	1.04222	0.69934	173.12	0.85327	145.975	100	2805	91.9344	34.4469	158.199	0.9125	0.67101	0.73333
	Lysotracker	Distal	PARGi to distal	FUS	FUS D5 Lyso PARGi to distal.tif Lyso.csv	0.82252	1.55299	0.26021	0.71729	0.46188	108.435	1	66.3523	100	1275	84.1781	34.4469	123.69	0.45625	0.64392	0.90909
	Lysotracker	Distal	PARGi to distal	FUS	FUS D5 Lyso PARGi to distal.tif Lyso.csv	0.82252	2	0.20816	0.72807	0.36403	108.435	0.85737	53.0819	100	1020	47.9063	36.2719	123.69	0.45625	0.5	0.8
	Lysotracker	Distal	PARGi to distal	FUS	FUS D5 Lyso PARGi to distal.tif Lyso.csv	0.64524	1.46385	0.15612	0.53943	0.3685	135	1	39.8114	100	765	102.656	36.5	135	0.45625	0.68313	0.85714
	Lysotracker	Distal	PARGi to distal	FUS	FUS D5 Lyso PARGi to distal.tif Lyso.csv	1.46071	1.37725	0.62449	1.04647	0.75982	152.656	0.64303	159.246	100	3060	19.1625	36.7281	141.34	0.9125	0.72608	0.72727
	Lysotracker	Distal	PARGi to distal	FUS	FUS D5 Lyso PARGi to distal.tif Lyso.csv	3.48218	1.74953	4.37145	3.12053	1.78364	164.736	0.53826	1114.72	100	21420	28.7437	37.1844	148.393	2.29727	0.57158	0.75
	Lysotracker	Distal	PARGi to distal	FUS	FUS D5 Lyso PARGi to distal.tif Lyso.csv	0.64524	1.46385	0.15612	0.53943	0.3685	135	1	39.8114	100	765	99.9188	36.7281	135	0.45625	0.68313	0.85714
	Lysotracker	Distal	PARGi to distal	FUS	FUS D5 Lyso PARGi to distal.tif Lyso.csv	1.33019	1.62585	0.52041	1.03793	0.63839	56.1017	0.65045	132.705	100	2550	6.84375	38.5531	59.0362	0.81663	0.61506	0.71429
	Lysotracker	Distal	PARGi to distal	FUS	FUS D5 Lyso PARGi to distal.tif Lyso.csv	1.46071	1.26368	0.8847	1.19308	0.94414	39.1832	0.74176	225.598	100	4335	32.1656	38.325	38.6598	1.12257	0.79134	0.7907
	Lysotracker	Distal	PARGi to distal	FUS	FUS D5 Lyso PARGi to distal.tif Lyso.csv	3.16921	1.85246	3.48675	2.86774	1.54807	26.5178	0.76324	889.121	100	17085	37.8688	39.4656	30.2564	1.88176	0.53982	0.8375
	Lysotracker	Distal	PARGi to distal	FUS	FUS D5 Lyso PARGi to distal.tif Lyso.csv	2.10321	1.22438	1.61327	1.58587	1.29524	111.404	0.6128	411.384	100	7905	97.1813	45.8531	77.4712	1.4291	0.81674	0.70455
	Lysotracker	Distal	PARGi to distal	FUS	FUS D5 Lyso PARGi to distal.tif Lyso.csv	0.64524	1.46385	0.15612	0.53943	0.3685	45	1	39.8114	100	765	87.3719	91.0219	45	0.45625	0.68313	0.85714
	Lysotracker	Distal	PARGi to distal	FUS	FUS D5 Lyso PARGi to distal.tif Lyso.csv	1.64503	1.51656	1.09286	1.45267	0.95787	140.018	0.80177	278.68	100	5355	47.2219	91.9344	123.69	1.12315	0.65939	0.79245
	Lysotracker	Distal	PARGi to distal	FUS	FUS D5 Lyso PARGi to distal.tif Lyso.csv	1.02021	1.3083	0.41633	0.83277	0.63653	124.722	0.91441	106.164	100	2040	24.4094	92.8469	116.565	0.68438	0.76435	0.8
	Lysotracker	Distal	PARGi to distal	FUS	FUS D5 Lyso PARGi to distal.tif Lyso.csv	1.02021	3.49339	0.20816	0.96224	0.27544	112.5	0.53901	53.0819	100	1020	21.2156	93.075	116.565	0.40831	0.28625	0.66667
	Lysotracker	Distal	PARGi to distal	FUS	FUS D5 Lyso PARGi to distal.tif Lyso.csv	0.64524	1	0.20816	0.51482	0.51482	0	1	53.0819	100	1020	114.747	93.3031	135	0.45625	1	1
	Lysotracker	Distal	PARGi to distal	FUS	FUS D5 Lyso PARGi to distal.tif Lyso.csv	0.72139	1.4676	0.20816	0.62368	0.42497	0	1	53.0819	100	1020	24.8656	94.4438	161.565	0.45625	0.68139	0.8
	Lysotracker	Distal	PARGi to distal	FUS	FUS D6 Lyso PARGi to distal.tif Lyso.csv	0.64524	1.46385	0.15612	0.53943	0.3685	135	1	39.8114	100	765	100.147	27.6031	135	0.45625	0.68313	0.85714
	Lysotracker	Distal	PARGi to distal	FUS	FUS D6 Lyso PARGi to distal.tif Lyso.csv	0.72139	1.5667	0.15612	0.55806	0.3562	0	0.5236	39.8114	100	765	61.3656	28.0594	161.565	0.45625	0.63828	0.6
	Lysotracker	Distal	PARGi to distal	FUS	FUS D6 Lyso PARGi to distal.tif Lyso.csv	0.64524	1.46385	0.15612	0.53943	0.3685	135	1	39.8114	100	765	110.869	29.2	135	0.45625	0.68313	0.85714
	Lysotracker	Distal	PARGi to distal	FUS	FUS D6 Lyso PARGi to distal.tif Lyso.csv	0.96785	1.37971	0.36429	0.79997	0.57981	59.5273	1	92.8932	100	1785	99.9188	30.3406	45	0.68438	0.72479	0.875
	Lysotracker	Distal	PARGi to distal	FUS	FUS D6 Lyso PARGi to distal.tif Lyso.csv	0.64524	1.46385	0.15612	0.53943	0.3685	135	1	39.8114	100	765	83.0375	30.1125	135	0.45625	0.68313	0.85714
	Lysotracker	Distal	PARGi to distal	FUS	FUS D6 Lyso PARGi to distal.tif Lyso.csv	1.78171	1.2277	1.35307	1.45432	1.18459	38.1811	0.80533	345.032	100	6630	111.781	31.2531	39.8056	1.36875	0.81453	0.83871
	Lysotracker	Distal	PARGi to distal	FUS	FUS D6 Lyso PARGi to distal.tif Lyso.csv	1.02021	1.3083	0.41633	0.83277	0.63653	34.722	0.91441	106.164	100	2040	13.6875	31.4812	26.565	0.68438	0.76435	0.8
	Lysotracker	Distal	PARGi to distal	FUS	FUS D6 Lyso PARGi to distal.tif Lyso.csv	1.96241	1.13978	1.61327	1.5301	1.34245	112.555	0.68779	411.384	100	7905	25.3219	31.7094	125.538	1.58756	0.87736	0.775
	Lysotracker	Distal	PARGi to distal	FUS	FUS D6 Lyso PARGi to distal.tif Lyso.csv	3.10284	1.76706	3.33063	2.73743	1.54915	108.128	0.66143	849.31	100	16320	109.272	32.3937	107.103	1.825	0.56591	0.83117
	Lysotracker	Distal	PARGi to distal	FUS	FUS D6 Lyso PARGi to distal.tif Lyso.csv	1.53031	1.12741	1.24898	1.33898	1.18766	136.348	0.97848	318.491	100	6120	39.4656	33.0781	116.565	1.29047	0.88699	0.84211
	Lysotracker	Distal	PARGi to distal	FUS	FUS D6 Lyso PARGi to distal.tif Lyso.csv	0.82252	2.70203	0.15612	0.73288	0.27123	151.845	0.75398	39.8114	100	765	104.938	33.0781	146.31	0.40831	0.37009	0.66667
	Lysotracker	Distal	PARGi to distal	FUS	FUS D6 Lyso PARGi to distal.tif Lyso.csv	1.14063	1.74606	0.36429	0.89993	0.5154	49.7312	0.62123	92.8932	100	1785	105.394	33.9906	36.8699	0.76092	0.57272	0.63636
	Lysotracker	Distal	PARGi to distal	FUS	FUS D6 Lyso PARGi to distal.tif Lyso.csv	0.96785	1.80907	0.31225	0.84807	0.46879	126.87	1	79.6228	100	1530	33.0781	33.7625	135	0.61247	0.55277	0.8
	Lysotracker	Distal	PARGi to distal	FUS	FUS D6 Lyso PARGi to distal.tif Lyso.csv	2.92143	1.2649	3.48675	2.3697	1.87343	35.4611	0.55036	889.121	100	17085	22.8125	36.0438	38.6598	2.05313	0.79058	0.80723
	Lysotracker	Distal	PARGi to distal	FUS	FUS D6 Lyso PARGi to distal.tif Lyso.csv	0.82252	1.1239	0.31225	0.66845	0.59476	26.565	1	79.6228	100	1530	31.025	34.2188	146.31	0.68438	0.88976	0.8
	Lysotracker	Distal	PARGi to distal	FUS	FUS D6 Lyso PARGi to distal.tif Lyso.csv	1.53031	1.25167	1.24898	1.41084	1.12717	45	0.97848	318.491	100	6120	8.2125	35.3594	26.565	1.29047	0.79894	0.81356
	Lysotracker	Distal	PARGi to distal	FUS	FUS D6 Lyso PARGi to distal.tif Lyso.csv	1.02021	1.55994	0.26021	0.7189	0.46085	114.699	0.40307	66.3523	100	1275	61.3656	76.4219	116.565	0.68438	0.64105	0.55556
	Lysotracker	Distal	PARGi to distal	FUS	FUS D6 Lyso PARGi to distal.tif Lyso.csv	1.46071	1.33824	0.67653	1.07366	0.80229	163.052	0.54497	172.516	100	3315	6.84375	82.3531	128.66	0.99637	0.74725	0.65
	Lysotracker	Distal	PARGi to distal	FUS	FUS D6 Lyso PARGi to distal.tif Lyso.csv	1.33019	1.26197	0.83266	1.15668	0.91657	63.9994	1	212.327	100	4080	59.7688	86.4594	59.0362	0.9125	0.79241	0.88889
	Lysotracker	Distal	PARGi to distal	FUS	FUS D6 Lyso PARGi to distal.tif Lyso.csv	1.02021	1.32727	0.52041	0.9378	0.70656	2.596e-14	1	132.705	100	2550	78.2469	85.3188	153.435	0.68438	0.75342	0.90909
	Lysotracker	Distal	PARGi to distal	FUS	FUS D6 Lyso PARGi to distal.tif Lyso.csv	2.16418	1.48973	1.40511	1.63254	1.09586	158.593	0.55942	358.303	100	6885	113.378	87.1438	161.565	1.36875	0.67126	0.68354
	Lysotracker	Distal	PARGi to distal	FUS	FUS D6 Lyso PARGi to distal.tif Lyso.csv	0.64524	1.46385	0.15612	0.53943	0.3685	45	1	39.8114	100	765	82.3531	87.6	45	0.45625	0.68313	0.85714
	Lysotracker	Distal	PARGi to distal	FUS	FUS D6 Lyso PARGi to distal.tif Lyso.csv	0.82252	1.5	0.31225	0.77223	0.51482	0	1	79.6228	100	1530	108.131	87.6	146.31	0.45625	0.66667	1
	Lysotracker	Distal	PARGi to distal	FUS	FUS D6 Lyso PARGi to distal.tif Lyso.csv	0.82252	1.1239	0.31225	0.66845	0.59476	26.565	1	79.6228	100	1530	103.797	87.8281	146.31	0.68438	0.88976	0.8
	Lysotracker	Distal	PARGi to distal	FUS	FUS D6 Lyso PARGi to distal.tif Lyso.csv	1.14063	1.30441	0.52041	0.92968	0.71272	126.323	0.88747	132.705	100	2550	22.1281	88.7406	143.13	0.81663	0.76663	0.76923
	Lysotracker	Distal	PARGi to distal	FUS	FUS D6 Lyso PARGi to distal.tif Lyso.csv	0.82252	2.03127	0.20816	0.73374	0.36122	31.7175	1	53.0819	100	1020	102.656	89.1969	33.6901	0.45625	0.4923	0.8
	Lysotracker	Distal	PARGi to distal	FUS	FUS D6 Lyso PARGi to distal.tif Lyso.csv	2.16418	1.76571	1.7694	1.99447	1.12956	149.531	0.75435	451.196	100	8670	112.922	89.1969	161.565	1.26729	0.56635	0.8
	Lysotracker	Distal	PARGi to distal	FUS	FUS D6 Lyso PARGi to distal.tif Lyso.csv	0.82252	1.55299	0.26021	0.71729	0.46188	161.565	1	66.3523	100	1275	101.744	88.9688	146.31	0.45625	0.64392	0.90909
	Lysotracker	Distal	PARGi to distal	FUS	FUS D6 Lyso PARGi to distal.tif Lyso.csv	2.8584	1.26284	3.48675	2.36777	1.87496	114.526	0.80279	889.121	100	17085	68.4375	89.8813	118.61	2.05313	0.79187	0.86452
	Lysotracker	Distal	PARGi to distal	FUS	FUS D6 Lyso PARGi to distal.tif Lyso.csv	1.44279	1.32267	0.83266	1.18417	0.89529	92.2099	0.77163	212.327	100	4080	78.7031	91.0219	108.435	0.9125	0.75605	0.8
	Lysotracker	Distal	PARGi to distal	FUS	FUS D6 Lyso PARGi to distal.tif Lyso.csv	0.96785	4.1231	0.15612	0.90532	0.21957	45	0.5236	39.8114	100	765	38.5531	92.1625	45	0.32262	0.24254	0.6
	Lysotracker	Distal	PARGi to distal	FUS	FUS D6 Lyso PARGi to distal.tif Lyso.csv	1.53031	1.16833	0.93674	1.18045	1.01037	72.3115	0.68724	238.868	100	4590	17.3375	98.7781	116.565	1.14063	0.85592	0.70588
	Lysotracker	Distal	PARP1i	Ctrl	Ctrl D1 Lyso PARP1i.tif Lyso.csv	0.82252	1.55299	0.26021	0.71729	0.46188	161.565	1	66.3523	100	1275	53.6094	25.7781	146.31	0.45625	0.64392	0.90909
	Lysotracker	Distal	PARP1i	Ctrl	Ctrl D1 Lyso PARP1i.tif Lyso.csv	1.29047	1.13657	0.78062	1.06285	0.93514	45.0006	1	199.057	100	3825	79.6156	28.2875	45	0.9125	0.87984	0.96774
	Lysotracker	Distal	PARP1i	Ctrl	Ctrl D1 Lyso PARP1i.tif Lyso.csv	0.94058	1.87136	0.26021	0.78739	0.42076	2.8553	0.64114	66.3523	100	1275	2.28125	28.0594	165.964	0.45625	0.53437	0.71429
	Lysotracker	Distal	PARP1i	Ctrl	Ctrl D1 Lyso PARP1i.tif Lyso.csv	2.88558	1.43151	3.01838	2.34552	1.63849	80.1083	0.45687	769.687	100	14790	19.1625	31.025	71.565	2.05313	0.69856	0.71605
	Lysotracker	Distal	PARP1i	Ctrl	Ctrl D1 Lyso PARP1i.tif Lyso.csv	1.66078	1.27084	1.35307	1.47965	1.16431	95.1597	0.99267	345.032	100	6630	69.5781	28.2875	105.945	1.14063	0.78688	0.88136
	Lysotracker	Distal	PARP1i	Ctrl	Ctrl D1 Lyso PARP1i.tif Lyso.csv	1.33019	1.33592	0.8847	1.22671	0.91825	82.8677	1	225.598	100	4335	116.116	28.2875	120.964	0.9125	0.74855	0.91892
	Lysotracker	Distal	PARP1i	Ctrl	Ctrl D1 Lyso PARP1i.tif Lyso.csv	1.64503	1.48765	1.19694	1.50571	1.01214	19.102	0.96418	305.221	100	5865	63.6469	29.4281	33.6901	1.14063	0.6722	0.88462
	Lysotracker	Distal	PARP1i	Ctrl	Ctrl D1 Lyso PARP1i.tif Lyso.csv	1.02021	1.25136	0.41633	0.81445	0.65085	104.872	0.64492	106.164	100	2040	8.2125	28.7437	116.565	0.68438	0.79913	0.7619
	Lysotracker	Distal	PARP1i	Ctrl	Ctrl D1 Lyso PARP1i.tif Lyso.csv	2.16418	2.00412	1.50919	1.96241	0.97918	3.03073	0.70549	384.843	100	7395	60.4531	29.8844	18.435	0.9125	0.49897	0.89231
	Lysotracker	Distal	PARP1i	Ctrl	Ctrl D1 Lyso PARP1i.tif Lyso.csv	1.02021	1.13876	0.57245	0.91105	0.80003	18.435	1	145.975	100	2805	58.1719	29.6562	153.435	0.9125	0.87814	0.81481
	Lysotracker	Distal	PARP1i	Ctrl	Ctrl D1 Lyso PARP1i.tif Lyso.csv	2.78462	1.09559	4.0592	2.37958	2.17195	7.07111	0.64875	1035.1	100	19890	65.4719	29.4281	145.008	2.28125	0.91275	0.8125
	Lysotracker	Distal	PARP1i	Ctrl	Ctrl D1 Lyso PARP1i.tif Lyso.csv	0.82252	2.70203	0.15612	0.73288	0.27123	61.845	0.64303	39.8114	100	765	43.8	30.5688	56.3099	0.40831	0.37009	0.66667
	Lysotracker	Distal	PARP1i	Ctrl	Ctrl D1 Lyso PARP1i.tif Lyso.csv	1.53031	1.21954	0.83266	1.13707	0.93237	97.1839	0.40126	212.327	100	4080	93.5313	29.8844	116.565	1.14063	0.81998	0.61538
	Lysotracker	Distal	PARP1i	Ctrl	Ctrl D1 Lyso PARP1i.tif Lyso.csv	0.82252	1.49607	0.26021	0.70403	0.47058	34.0993	0.87266	66.3523	100	1275	42.8875	30.7969	33.6901	0.61247	0.66842	0.71429
	Lysotracker	Distal	PARP1i	Ctrl	Ctrl D1 Lyso PARP1i.tif Lyso.csv	2.16418	1.07314	2.60205	1.88557	1.75705	160.786	0.84844	663.523	100	12750	84.4063	31.025	161.565	1.825	0.93184	0.84034
	Lysotracker	Distal	PARP1i	Ctrl	Ctrl D1 Lyso PARP1i.tif Lyso.csv	0.82252	1.5	0.31225	0.77223	0.51482	90	1	79.6228	100	1530	46.5375	30.3406	123.69	0.45625	0.66667	1
	Lysotracker	Distal	PARP1i	Ctrl	Ctrl D1 Lyso PARP1i.tif Lyso.csv	2.16418	1.50167	1.71735	1.81206	1.2067	119.146	0.50601	437.925	100	8415	107.903	30.3406	108.435	1.47771	0.66592	0.70968
	Lysotracker	Distal	PARP1i	Ctrl	Ctrl D1 Lyso PARP1i.tif Lyso.csv	1.16321	1.01707	0.72857	0.97133	0.95503	0	0.99252	185.786	100	3570	14.8281	31.025	168.69	0.9125	0.98322	0.82353
	Lysotracker	Distal	PARP1i	Ctrl	Ctrl D1 Lyso PARP1i.tif Lyso.csv	3.56343	1.43199	4.63165	2.90598	2.02933	46.2317	0.71842	1181.07	100	22695	51.7844	33.0781	39.8056	2.24515	0.69833	0.86408
	Lysotracker	Distal	PARP1i	Ctrl	Ctrl D1 Lyso PARP1i.tif Lyso.csv	0.64524	1	0.20816	0.51482	0.51482	0	1	53.0819	100	1020	13.2312	31.025	135	0.45625	1	1
	Lysotracker	Distal	PARP1i	Ctrl	Ctrl D1 Lyso PARP1i.tif Lyso.csv	0.64524	1.46385	0.15612	0.53943	0.3685	45	1	39.8114	100	765	77.1063	31.4812	45	0.45625	0.68313	0.85714
	Lysotracker	Distal	PARP1i	Ctrl	Ctrl D1 Lyso PARP1i.tif Lyso.csv	1.22849	1.75572	0.62449	1.18153	0.67296	4.83668	0.96737	159.246	100	3060	82.5813	31.2531	158.199	0.68438	0.56957	0.88889
	Lysotracker	Distal	PARP1i	Ctrl	Ctrl D1 Lyso PARP1i.tif Lyso.csv	1.61309	1.37855	1.1449	1.41759	1.02832	63.3571	0.92226	291.95	100	5610	33.5344	32.6219	45	1.14063	0.7254	0.86275
	Lysotracker	Distal	PARP1i	Ctrl	Ctrl D1 Lyso PARP1i.tif Lyso.csv	1.02021	1.32727	0.52041	0.9378	0.70656	90	1	132.705	100	2550	16.6531	31.7094	116.565	0.68438	0.75342	0.90909
	Lysotracker	Distal	PARP1i	Ctrl	Ctrl D1 Lyso PARP1i.tif Lyso.csv	3.22618	1.96195	3.43471	2.92917	1.49299	163.798	0.60216	875.851	100	16830	36.9563	33.0781	171.87	1.82657	0.5097	0.77193
	Lysotracker	Distal	PARP1i	Ctrl	Ctrl D1 Lyso PARP1i.tif Lyso.csv	1.02021	1.34281	0.46837	0.89486	0.66641	78.0188	0.92273	119.434	100	2295	27.375	32.1656	116.565	0.68438	0.74471	0.85714
	Lysotracker	Distal	PARP1i	Ctrl	Ctrl D1 Lyso PARP1i.tif Lyso.csv	1.53031	1.48033	0.83266	1.25276	0.84627	162.341	0.49559	212.327	100	4080	41.975	32.6219	153.435	1.0825	0.67553	0.68085
	Lysotracker	Distal	PARP1i	Ctrl	Ctrl D1 Lyso PARP1i.tif Lyso.csv	1.64503	1.21036	1.40511	1.47152	1.21577	12.4916	1	358.303	100	6885	44.7125	33.9906	33.6901	1.14063	0.8262	0.94737
	Lysotracker	Distal	PARP1i	Ctrl	Ctrl D1 Lyso PARP1i.tif Lyso.csv	1.02021	1.34027	0.46837	0.89402	0.66704	20.3007	1	119.434	100	2295	47.2219	83.2656	26.565	0.68438	0.74612	0.85714
	Lysotracker	Distal	PARP1i	Ctrl	Ctrl D1 Lyso PARP1i.tif Lyso.csv	1.22849	2.69682	0.36429	1.11842	0.41472	6.13239	0.5643	92.8932	100	1785	40.15	83.7219	21.8014	0.45625	0.37081	0.73684
	Lysotracker	Distal	PARP1i	Ctrl	Ctrl D1 Lyso PARP1i.tif Lyso.csv	1.14063	1.37205	0.57245	1.00002	0.72885	15.0707	1	145.975	100	2805	46.3094	84.1781	36.8699	0.68438	0.72883	0.95652
	Lysotracker	Distal	PARP1i	Ctrl	Ctrl D1 Lyso PARP1i.tif Lyso.csv	1.02021	1	0.62449	0.8917	0.8917	0	1	159.246	100	3060	106.078	83.4938	116.565	0.9125	1	0.85714
	Lysotracker	Distal	PARP1i	Ctrl	Ctrl D1 Lyso PARP1i.tif Lyso.csv	1.14063	1.2852	0.52041	0.92281	0.71803	70.0972	0.80615	132.705	100	2550	24.1812	84.8625	53.1301	0.68438	0.77809	0.86957
	Lysotracker	Distal	PARP1i	Ctrl	Ctrl D1 Lyso PARP1i.tif Lyso.csv	0.82252	2.70203	0.15612	0.73288	0.27123	28.155	0.75398	39.8114	100	765	31.2531	84.4063	33.6901	0.40831	0.37009	0.66667
	Lysotracker	Distal	PARP1i	Ctrl	Ctrl D1 Lyso PARP1i.tif Lyso.csv	1.53031	1.0586	1.40511	1.37618	1.3	33.523	1	358.303	100	6885	0	84.6344	153.435	1.36875	0.94465	0.88525
	Lysotracker	Distal	PARP1i	Ctrl	Ctrl D1 Lyso PARP1i.tif Lyso.csv	1.14063	1.20066	0.57245	0.93548	0.77914	82.3724	0.85327	145.975	100	2805	16.425	85.5469	53.1301	0.9125	0.83287	0.78571
	Lysotracker	Distal	PARP1i	Ctrl	Ctrl D1 Lyso PARP1i.tif Lyso.csv	1.53031	1.22504	1.04082	1.27414	1.04008	64.1102	0.69836	265.409	100	5100	50.8719	86.0031	63.435	1.14063	0.8163	0.78431
	Lysotracker	Distal	PARP1i	Ctrl	Ctrl D1 Lyso PARP1i.tif Lyso.csv	1.78171	1.13154	1.82144	1.61994	1.43161	168.842	1	464.466	100	8925	101.288	84.6344	129.806	1.36875	0.88375	0.90909
	Lysotracker	Distal	PARP1i	Ctrl	Ctrl D1 Lyso PARP1i.tif Lyso.csv	1.14063	1.55121	0.52041	1.01383	0.65357	153.435	1	132.705	100	2550	74.1406	84.8625	143.13	0.68438	0.64466	0.90909
	Lysotracker	Distal	PARP1i	Ctrl	Ctrl D1 Lyso PARP1i.tif Lyso.csv	0.64524	1.46385	0.15612	0.53943	0.3685	45	1	39.8114	100	765	3.65	85.5469	45	0.45625	0.68313	0.85714
	Lysotracker	Distal	PARP1i	Ctrl	Ctrl D1 Lyso PARP1i.tif Lyso.csv	0.82252	1.55299	0.26021	0.71729	0.46188	71.565	1	66.3523	100	1275	91.0219	85.775	56.3099	0.45625	0.64392	0.90909
	Lysotracker	Distal	PARP1i	Ctrl	Ctrl D1 Lyso PARP1i.tif Lyso.csv	1.46071	1.32021	0.83266	1.18307	0.89612	37.9819	0.95824	212.327	100	4080	89.6531	86.4594	38.6598	0.9125	0.75745	0.88889
	Lysotracker	Distal	PARP1i	Ctrl	Ctrl D1 Lyso PARP1i.tif Lyso.csv	1.22849	1.42045	0.67653	1.10615	0.77873	70.2059	0.92163	172.516	100	3315	103.341	86.6875	68.1986	0.9125	0.704	0.8125
	Lysotracker	Distal	PARP1i	Ctrl	Ctrl D1 Lyso PARP1i.tif Lyso.csv	1.33019	2.17267	0.57245	1.25841	0.5792	17.0799	0.88676	145.975	100	2805	54.75	86.4594	30.9638	0.68438	0.46026	0.84615
	Lysotracker	Distal	PARP1i	Ctrl	Ctrl D1 Lyso PARP1i.tif Lyso.csv	1.78171	1.15284	1.56123	1.51381	1.31312	35.7396	1	398.114	100	7650	65.7	87.1438	39.8056	1.36875	0.86742	0.92308
	Lysotracker	Distal	PARP1i	Ctrl	Ctrl D1 Lyso PARP1i.tif Lyso.csv	1.73735	1.16253	1.56123	1.52017	1.30763	26.6155	0.98572	398.114	100	7650	109.956	86.9156	23.1986	1.36875	0.86019	0.88235
	Lysotracker	Distal	PARP1i	Ctrl	Ctrl D1 Lyso PARP1i.tif Lyso.csv	1.14063	1.96865	0.36429	0.95557	0.48539	45	0.68722	92.8932	100	1785	51.5563	86.9156	36.8699	0.64524	0.50796	0.66667
	Lysotracker	Distal	PARP1i	Ctrl	Ctrl D1 Lyso PARP1i.tif Lyso.csv	0.64524	1.46385	0.15612	0.53943	0.3685	45	1	39.8114	100	765	53.1531	86.4594	45	0.45625	0.68313	0.85714
	Lysotracker	Distal	PARP1i	Ctrl	Ctrl D1 Lyso PARP1i.tif Lyso.csv	2.10321	1.19236	2.39389	1.90639	1.59883	44.9693	0.92707	610.441	100	11730	47.2219	88.2844	40.6013	1.73504	0.83867	0.87619
	Lysotracker	Distal	PARP1i	Ctrl	Ctrl D1 Lyso PARP1i.tif Lyso.csv	0.82252	2.70203	0.15612	0.73288	0.27123	61.845	0.64303	39.8114	100	765	75.7375	87.3719	56.3099	0.40831	0.37009	0.66667
	Lysotracker	Distal	PARP1i	Ctrl	Ctrl D1 Lyso PARP1i.tif Lyso.csv	0.82252	2.70203	0.15612	0.73288	0.27123	151.845	0.75398	39.8114	100	765	56.575	86.9156	146.31	0.40831	0.37009	0.66667
	Lysotracker	Distal	PARP1i	Ctrl	Ctrl D1 Lyso PARP1i.tif Lyso.csv	1.96241	1.08022	1.97756	1.64921	1.52674	85.1901	0.86055	504.278	100	9690	58.1719	88.2844	35.5377	1.59688	0.92574	0.82609
	Lysotracker	Distal	PARP1i	Ctrl	Ctrl D1 Lyso PARP1i.tif Lyso.csv	1.02021	1.31594	0.52041	0.93378	0.70959	71.565	0.98175	132.705	100	2550	71.6313	87.3719	116.565	0.81663	0.75991	0.76923
	Lysotracker	Distal	PARP1i	Ctrl	Ctrl D1 Lyso PARP1i.tif Lyso.csv	0.64524	1.46385	0.15612	0.53943	0.3685	45	1	39.8114	100	765	61.1375	88.0563	45	0.45625	0.68313	0.85714
	Lysotracker	Distal	PARP1i	Ctrl	Ctrl D1 Lyso PARP1i.tif Lyso.csv	1.78171	1.11845	1.56123	1.49107	1.33315	16.3281	0.8113	398.114	100	7650	62.9625	88.9688	50.1944	1.36875	0.89409	0.82192
	Lysotracker	Distal	PARP1i	Ctrl	Ctrl D1 Lyso PARP1i.tif Lyso.csv	0.82252	1.55299	0.26021	0.71729	0.46188	18.435	1	66.3523	100	1275	107.903	88.0563	33.6901	0.45625	0.64392	0.90909
	Lysotracker	Distal	PARP1i	Ctrl	Ctrl D2 Lyso PARP1i.tif Lyso.csv	1.66078	1.23916	1.50919	1.54309	1.24527	73.4467	0.95287	384.843	100	7395	13.4594	28.2875	105.945	1.36875	0.807	0.85294
	Lysotracker	Distal	PARP1i	Ctrl	Ctrl D2 Lyso PARP1i.tif Lyso.csv	1.66078	1.4469	1.19694	1.48495	1.0263	117.488	0.60823	305.221	100	5865	99.9188	28.7437	105.945	1.29047	0.69113	0.71875
	Lysotracker	Distal	PARP1i	Ctrl	Ctrl D2 Lyso PARP1i.tif Lyso.csv	0.82252	1.06423	0.26021	0.59379	0.55795	45.0006	0.5715	66.3523	100	1275	23.2688	28.9719	123.69	0.68438	0.93964	0.66667
	Lysotracker	Distal	PARP1i	Ctrl	Ctrl D2 Lyso PARP1i.tif Lyso.csv	0.94058	4	0.20816	1.02965	0.25741	90	0.64492	53.0819	100	1020	78.0188	29.2	104.036	0.22813	0.25	1
	Lysotracker	Distal	PARP1i	Ctrl	Ctrl D2 Lyso PARP1i.tif Lyso.csv	1.73735	1.23351	1.56123	1.56588	1.26946	103.5	0.98572	398.114	100	7650	91.25	29.2	113.199	1.36875	0.8107	0.86957
	Lysotracker	Distal	PARP1i	Ctrl	Ctrl D2 Lyso PARP1i.tif Lyso.csv	2.74699	1.92158	2.75817	2.59773	1.35188	38.4603	0.59503	703.335	100	13515	96.9531	31.2531	41.6335	1.7362	0.52041	0.75714
	Lysotracker	Distal	PARP1i	Ctrl	Ctrl D2 Lyso PARP1i.tif Lyso.csv	1.53031	1.5931	0.83266	1.2996	0.81577	97.0181	0.71853	212.327	100	4080	32.85	29.4281	116.565	0.9125	0.62771	0.78049
	Lysotracker	Distal	PARP1i	Ctrl	Ctrl D2 Lyso PARP1i.tif Lyso.csv	1.46071	1.49257	0.78062	1.21798	0.81603	65.3203	0.49286	199.057	100	3825	84.6344	31.2531	38.6598	1.10674	0.66998	0.61224
	Lysotracker	Distal	PARP1i	Ctrl	Ctrl D2 Lyso PARP1i.tif Lyso.csv	2.67014	1.21312	3.85104	2.43891	2.01044	14.2016	0.89219	982.014	100	18870	11.6344	31.9375	19.9831	2.25832	0.82432	0.88095
	Lysotracker	Distal	PARP1i	Ctrl	Ctrl D2 Lyso PARP1i.tif Lyso.csv	1.22849	1.57861	0.62449	1.12036	0.70971	80.5831	0.96737	159.246	100	3060	15.7406	31.4812	68.1986	0.68438	0.63347	0.88889
	Lysotracker	Distal	PARP1i	Ctrl	Ctrl D2 Lyso PARP1i.tif Lyso.csv	2.45698	1.1795	3.12246	2.16547	1.83592	108.513	0.88349	796.228	100	15300	72.0875	30.5688	111.801	2.02023	0.84782	0.86331
	Lysotracker	Distal	PARP1i	Ctrl	Ctrl D2 Lyso PARP1i.tif Lyso.csv	1.33019	1.21751	0.93674	1.20504	0.98976	90	1	238.868	100	4590	35.8156	30.7969	120.964	0.9125	0.82135	0.94737
	Lysotracker	Distal	PARP1i	Ctrl	Ctrl D2 Lyso PARP1i.tif Lyso.csv	0.64524	1.46385	0.15612	0.53943	0.3685	135	1	39.8114	100	765	79.8438	31.4812	135	0.45625	0.68313	0.85714
	Lysotracker	Distal	PARP1i	Ctrl	Ctrl D2 Lyso PARP1i.tif Lyso.csv	1.8392	1.27084	1.66531	1.64153	1.29169	78.09	0.93594	424.655	100	8160	4.79063	33.3062	60.2551	1.36875	0.78688	0.87671
	Lysotracker	Distal	PARP1i	Ctrl	Ctrl D2 Lyso PARP1i.tif Lyso.csv	1.02021	1.55368	0.41633	0.90751	0.58411	65.593	0.91441	106.164	100	2040	14.8281	32.6219	63.435	0.68438	0.64363	0.8
	Lysotracker	Distal	PARP1i	Ctrl	Ctrl D2 Lyso PARP1i.tif Lyso.csv	1.33019	1.55209	0.62449	1.11091	0.71575	73.4799	0.78054	159.246	100	3060	27.6031	32.85	59.0362	0.86616	0.64429	0.77419
	Lysotracker	Distal	PARP1i	Ctrl	Ctrl D2 Lyso PARP1i.tif Lyso.csv	1.46071	1.45007	0.62449	1.07377	0.7405	89.0662	0.41902	159.246	100	3060	43.5719	32.85	51.3402	1.10674	0.68962	0.57143
	Lysotracker	Distal	PARP1i	Ctrl	Ctrl D2 Lyso PARP1i.tif Lyso.csv	1.02021	2.0226	0.31225	0.89672	0.44335	120.964	0.68581	79.6228	100	1530	8.2125	31.9375	116.565	0.61247	0.49441	0.70588
	Lysotracker	Distal	PARP1i	Ctrl	Ctrl D2 Lyso PARP1i.tif Lyso.csv	1.66078	1.41616	1.30103	1.53163	1.08154	97.6493	0.89572	331.762	100	6375	10.0375	31.9375	105.945	1.14063	0.70613	0.86207
	Lysotracker	Distal	PARP1i	Ctrl	Ctrl D2 Lyso PARP1i.tif Lyso.csv	0.82252	2.03127	0.20816	0.73374	0.36122	58.2825	0.85737	53.0819	100	1020	51.3281	32.6219	56.3099	0.45625	0.4923	0.8
	Lysotracker	Distal	PARP1i	Ctrl	Ctrl D2 Lyso PARP1i.tif Lyso.csv	1.46071	1.02872	1.09286	1.19643	1.16302	16.1378	0.88034	278.68	100	5355	78.9313	32.3937	128.66	1.14063	0.97208	0.82353
	Lysotracker	Distal	PARP1i	Ctrl	Ctrl D2 Lyso PARP1i.tif Lyso.csv	5.0652	2.16227	8.32656	4.78788	2.21428	1.07137	0.5551	2123.27	100	40800	63.4188	34.675	7.76517	2.69852	0.46248	0.81218
	Lysotracker	Distal	PARP1i	Ctrl	Ctrl D2 Lyso PARP1i.tif Lyso.csv	2.04041	1.3211	1.87348	1.7752	1.34373	56.8924	0.85737	477.737	100	9180	39.4656	34.675	63.435	1.53089	0.75695	0.82759
	Lysotracker	Distal	PARP1i	Ctrl	Ctrl D2 Lyso PARP1i.tif Lyso.csv	1.14063	1.28124	0.62449	1.00933	0.78778	122.067	1	159.246	100	3060	33.7625	33.0781	126.87	0.9125	0.78049	0.85714
	Lysotracker	Distal	PARP1i	Ctrl	Ctrl D2 Lyso PARP1i.tif Lyso.csv	1.22849	1.57861	0.62449	1.12036	0.70971	99.4169	0.96737	159.246	100	3060	60.225	33.0781	111.801	0.68438	0.63347	0.88889
	Lysotracker	Distal	PARP1i	Ctrl	Ctrl D2 Lyso PARP1i.tif Lyso.csv	3.32155	1.03444	5.15206	2.60494	2.51822	46.2747	0.6207	1313.78	100	25245	70.0344	36.2719	74.0546	2.73801	0.96671	0.76744
	Lysotracker	Distal	PARP1i	Ctrl	Ctrl D2 Lyso PARP1i.tif Lyso.csv	1.02021	1.41576	0.41633	0.8663	0.6119	97.0181	0.91441	106.164	100	2040	0	33.5344	116.565	0.68438	0.70633	0.8
	Lysotracker	Distal	PARP1i	Ctrl	Ctrl D2 Lyso PARP1i.tif Lyso.csv	0.96785	1.37971	0.36429	0.79997	0.57981	30.4727	1	92.8932	100	1785	73.4563	34.4469	45	0.68438	0.72479	0.875
	Lysotracker	Distal	PARP1i	Ctrl	Ctrl D2 Lyso PARP1i.tif Lyso.csv	1.02021	1.93571	0.36429	0.94754	0.48951	98.3496	0.94327	92.8932	100	1785	72.5438	33.9906	116.565	0.45625	0.51661	0.93333
	Lysotracker	Distal	PARP1i	Ctrl	Ctrl D2 Lyso PARP1i.tif Lyso.csv	0.72139	3	0.15612	0.77223	0.25741	90	0.80852	39.8114	100	765	23.725	34.675	108.435	0.22813	0.33333	1
	Lysotracker	Distal	PARP1i	Ctrl	Ctrl D2 Lyso PARP1i.tif Lyso.csv	3.39132	1.74226	3.53879	2.80181	1.60815	72.3281	0.56557	902.391	100	17340	46.0813	89.1969	70.3462	2.05313	0.57397	0.75138
	Lysotracker	Distal	PARP1i	Ctrl	Ctrl D2 Lyso PARP1i.tif Lyso.csv	1.78171	1.59042	1.19694	1.55685	0.97889	54.6587	0.96418	305.221	100	5865	88.7406	87.3719	50.1944	1.12916	0.62876	0.92
	Lysotracker	Distal	PARP1i	Ctrl	Ctrl D2 Lyso PARP1i.tif Lyso.csv	1.61309	1.51459	1.09286	1.45173	0.9585	95.9265	0.88034	278.68	100	5355	17.7937	86.6875	98.1301	0.9125	0.66025	0.875
	Lysotracker	Distal	PARP1i	Ctrl	Ctrl D2 Lyso PARP1i.tif Lyso.csv	0.94058	2.18816	0.26021	0.85144	0.38911	5.15242	0.76359	66.3523	100	1275	97.8656	87.1438	165.964	0.45625	0.45701	0.76923
	Lysotracker	Distal	PARP1i	Ctrl	Ctrl D2 Lyso PARP1i.tif Lyso.csv	1.44279	1.18527	1.09286	1.28424	1.0835	88.7181	0.85617	278.68	100	5355	107.903	87.1438	108.435	1.14063	0.84369	0.84
	Lysotracker	Distal	PARP1i	Ctrl	Ctrl D2 Lyso PARP1i.tif Lyso.csv	1.02021	1.34281	0.46837	0.89486	0.66641	101.981	0.92273	119.434	100	2295	86.2313	87.3719	116.565	0.68438	0.74471	0.85714
	Lysotracker	Distal	PARP1i	Ctrl	Ctrl D2 Lyso PARP1i.tif Lyso.csv	0.72139	1.4676	0.20816	0.62368	0.42497	0	1	53.0819	100	1020	99.4625	87.8281	161.565	0.45625	0.68139	0.8
	Lysotracker	Distal	PARP1i	Ctrl	Ctrl D2 Lyso PARP1i.tif Lyso.csv	1.22849	1.31218	0.67653	1.06315	0.81022	101.31	0.92163	172.516	100	3315	1.14063	88.0563	111.801	0.9125	0.76209	0.8125
	Lysotracker	Distal	PARP1i	Ctrl	Ctrl D2 Lyso PARP1i.tif Lyso.csv	3.4747	2.4863	3.48675	3.32233	1.33625	122.962	0.51262	889.121	100	17085	80.3	88.5125	113.199	1.7148	0.4022	0.6943
	Lysotracker	Distal	PARP1i	Ctrl	Ctrl D2 Lyso PARP1i.tif Lyso.csv	0.94058	1.80907	0.31225	0.84807	0.46879	90	0.80852	79.6228	100	1530	87.3719	88.5125	104.036	0.45625	0.55277	0.85714
	Lysotracker	Distal	PARP1i	Ctrl	Ctrl D2 Lyso PARP1i.tif Lyso.csv	1.73735	1.25022	1.45715	1.523	1.21819	119.123	0.92001	371.573	100	7140	86.0031	89.1969	113.199	1.29047	0.79986	0.86154
	Lysotracker	Distal	PARP1i	Ctrl	Ctrl D2 Lyso PARP1i.tif Lyso.csv	1.44279	1.34333	0.98878	1.30046	0.96809	85.768	1	252.139	100	4845	16.425	91.0219	71.565	0.9125	0.74442	0.88372
	Lysotracker	Distal	PARP1i	Ctrl	Ctrl D2 Lyso PARP1i.tif Lyso.csv	0.82252	2.70203	0.15612	0.73288	0.27123	61.845	0.64303	39.8114	100	765	44.2563	90.5656	56.3099	0.40831	0.37009	0.66667
	Lysotracker	Distal	PARP1i	Ctrl	Ctrl D2 Lyso PARP1i.tif Lyso.csv	1.02021	1.93571	0.36429	0.94754	0.48951	81.6504	0.94327	92.8932	100	1785	12.775	91.25	63.435	0.45625	0.51661	0.93333
	Lysotracker	Distal	PARP1i	Ctrl	Ctrl D2 Lyso PARP1i.tif Lyso.csv	0.72139	1.4676	0.20816	0.62368	0.42497	90	0.85737	53.0819	100	1020	13.6875	90.3375	108.435	0.45625	0.68139	0.8
	Lysotracker	Distal	PARP1i	Ctrl	Ctrl D3 Lyso PARP1i.tif Lyso.csv	1.78171	1.0483	1.7694	1.53677	1.46597	60.0471	0.97156	451.196	100	8670	81.6688	25.7781	50.1944	1.59688	0.95393	0.85
	Lysotracker	Distal	PARP1i	Ctrl	Ctrl D3 Lyso PARP1i.tif Lyso.csv	1.33019	1.29171	0.83266	1.17023	0.90595	94.8367	1	212.327	100	4080	57.7156	24.6375	120.964	0.9125	0.77417	0.88889
	Lysotracker	Distal	PARP1i	Ctrl	Ctrl D3 Lyso PARP1i.tif Lyso.csv	0.94058	1.80907	0.31225	0.84807	0.46879	90	0.80852	79.6228	100	1530	65.4719	25.55	104.036	0.45625	0.55277	0.85714
	Lysotracker	Distal	PARP1i	Ctrl	Ctrl D3 Lyso PARP1i.tif Lyso.csv	1.33019	1.08791	0.78062	1.03985	0.95582	162.857	0.7234	199.057	100	3825	105.622	25.7781	120.964	1.0825	0.91919	0.76923
	Lysotracker	Distal	PARP1i	Ctrl	Ctrl D3 Lyso PARP1i.tif Lyso.csv	0.82252	2.03127	0.20816	0.73374	0.36122	121.717	0.85737	53.0819	100	1020	115.203	25.7781	123.69	0.45625	0.4923	0.8
	Lysotracker	Distal	PARP1i	Ctrl	Ctrl D3 Lyso PARP1i.tif Lyso.csv	1.33019	1.73501	0.67653	1.22251	0.70461	104.872	1	172.516	100	3315	38.7813	26.0063	120.964	0.68438	0.57636	0.92857
	Lysotracker	Distal	PARP1i	Ctrl	Ctrl D3 Lyso PARP1i.tif Lyso.csv	0.64524	1.46385	0.15612	0.53943	0.3685	135	1	39.8114	100	765	71.4031	26.0063	135	0.45625	0.68313	0.85714
	Lysotracker	Distal	PARP1i	Ctrl	Ctrl D3 Lyso PARP1i.tif Lyso.csv	1.8392	1.30821	1.71735	1.69131	1.29284	9.43699	0.84583	437.925	100	8415	95.3563	26.4625	150.255	1.36875	0.7644	0.86842
	Lysotracker	Distal	PARP1i	Ctrl	Ctrl D3 Lyso PARP1i.tif Lyso.csv	0.82252	1.55299	0.26021	0.71729	0.46188	71.565	1	66.3523	100	1275	81.8969	27.375	56.3099	0.45625	0.64392	0.90909
	Lysotracker	Distal	PARP1i	Ctrl	Ctrl D3 Lyso PARP1i.tif Lyso.csv	2.32643	1.61222	1.92552	1.98811	1.23315	93.507	0.74568	491.007	100	9435	83.0375	27.1469	101.31	1.36875	0.62026	0.82222
	Lysotracker	Distal	PARP1i	Ctrl	Ctrl D3 Lyso PARP1i.tif Lyso.csv	1.64503	1.15052	1.50919	1.48688	1.29235	77.5704	0.97696	384.843	100	7395	111.325	27.1469	123.69	1.36875	0.86917	0.89231
	Lysotracker	Distal	PARP1i	Ctrl	Ctrl D3 Lyso PARP1i.tif Lyso.csv	2.28125	1.24065	2.34185	1.92335	1.55028	116.469	0.69001	597.171	100	11475	28.9719	28.2875	143.13	1.8039	0.80603	0.80357
	Lysotracker	Distal	PARP1i	Ctrl	Ctrl D3 Lyso PARP1i.tif Lyso.csv	0.94058	1.80907	0.31225	0.84807	0.46879	90	0.80852	79.6228	100	1530	88.2844	28.0594	104.036	0.45625	0.55277	0.85714
	Lysotracker	Distal	PARP1i	Ctrl	Ctrl D3 Lyso PARP1i.tif Lyso.csv	1.9491	1.26858	1.7694	1.69054	1.33263	85.5886	0.80974	451.196	100	8670	1.36875	30.7969	69.444	1.36875	0.78828	0.83951
	Lysotracker	Distal	PARP1i	Ctrl	Ctrl D3 Lyso PARP1i.tif Lyso.csv	3.10284	1.49201	3.95512	2.74107	1.83717	6.73048	0.62429	1008.56	100	19380	18.4781	30.3406	17.1027	2.05313	0.67024	0.82609
	Lysotracker	Distal	PARP1i	Ctrl	Ctrl D3 Lyso PARP1i.tif Lyso.csv	1.14063	1.46742	0.46837	0.93546	0.63749	138.797	0.79872	119.434	100	2295	33.9906	28.9719	126.87	0.80654	0.68147	0.72
	Lysotracker	Distal	PARP1i	Ctrl	Ctrl D3 Lyso PARP1i.tif Lyso.csv	0.82252	2	0.20816	0.72807	0.36403	71.565	0.85737	53.0819	100	1020	70.7188	29.6562	56.3099	0.45625	0.5	0.8
	Lysotracker	Distal	PARP1i	Ctrl	Ctrl D3 Lyso PARP1i.tif Lyso.csv	1.88117	1.95708	1.30103	1.80054	0.92001	77.3725	0.77435	331.762	100	6375	3.42188	29.4281	104.036	1.10674	0.51097	0.79365
	Lysotracker	Distal	PARP1i	Ctrl	Ctrl D3 Lyso PARP1i.tif Lyso.csv	0.72139	1.4676	0.20816	0.62368	0.42497	90	0.85737	53.0819	100	1020	41.5188	29.4281	108.435	0.45625	0.68139	0.8
	Lysotracker	Distal	PARP1i	Ctrl	Ctrl D3 Lyso PARP1i.tif Lyso.csv	0.72139	1.4676	0.20816	0.62368	0.42497	0	1	53.0819	100	1020	37.4125	29.6562	161.565	0.45625	0.68139	0.8
	Lysotracker	Distal	PARP1i	Ctrl	Ctrl D3 Lyso PARP1i.tif Lyso.csv	0.82252	2.70203	0.15612	0.73288	0.27123	118.155	0.64303	39.8114	100	765	49.7313	29.6562	123.69	0.40831	0.37009	0.66667
	Lysotracker	Distal	PARP1i	Ctrl	Ctrl D3 Lyso PARP1i.tif Lyso.csv	0.94058	1.38707	0.36429	0.8021	0.57827	100.901	0.80011	92.8932	100	1785	13.4594	29.8844	104.036	0.68438	0.72094	0.73684
	Lysotracker	Distal	PARP1i	Ctrl	Ctrl D3 Lyso PARP1i.tif Lyso.csv	0.64524	1	0.20816	0.51482	0.51482	0	1	53.0819	100	1020	106.078	80.0719	135	0.45625	1	1
	Lysotracker	Distal	PARP1i	Ctrl	Ctrl D3 Lyso PARP1i.tif Lyso.csv	2.24677	1.2622	2.55001	2.02437	1.60384	0.46478	0.83147	650.253	100	12495	92.1625	80.9844	156.038	1.825	0.79227	0.84483
	Lysotracker	Distal	PARP1i	Ctrl	Ctrl D3 Lyso PARP1i.tif Lyso.csv	1.73735	1.70587	1.30103	1.68101	0.98543	85.6513	0.98055	331.762	100	6375	116.116	81.8969	66.8014	0.9125	0.58621	0.9434
	Lysotracker	Distal	PARP1i	Ctrl	Ctrl D3 Lyso PARP1i.tif Lyso.csv	0.82252	1.1239	0.31225	0.66845	0.59476	116.565	0.91631	79.6228	100	1530	89.1969	80.5281	123.69	0.68438	0.88976	0.8
	Lysotracker	Distal	PARP1i	Ctrl	Ctrl D3 Lyso PARP1i.tif Lyso.csv	1.14063	1.63402	0.41633	0.93068	0.56957	138.927	0.7854	106.164	100	2040	99.2344	80.7563	126.87	0.80654	0.61199	0.66667
	Lysotracker	Distal	PARP1i	Ctrl	Ctrl D3 Lyso PARP1i.tif Lyso.csv	2.04041	1.23377	2.28981	1.89658	1.53722	157.528	0.99643	583.9	100	11220	90.1094	81.2125	153.435	1.59688	0.81052	0.90722
	Lysotracker	Distal	PARP1i	Ctrl	Ctrl D3 Lyso PARP1i.tif Lyso.csv	1.64503	1.23068	1.19694	1.36951	1.1128	15.2129	0.96418	305.221	100	5865	8.66875	82.3531	33.6901	1.14063	0.81256	0.86792
	Lysotracker	Distal	PARP1i	Ctrl	Ctrl D3 Lyso PARP1i.tif Lyso.csv	1.33019	1.13386	0.8847	1.13014	0.99672	101.31	1	225.598	100	4335	21.4438	81.2125	120.964	0.9125	0.88194	0.91892
	Lysotracker	Distal	PARP1i	Ctrl	Ctrl D3 Lyso PARP1i.tif Lyso.csv	0.96785	1.22859	0.41633	0.80701	0.65686	135	1	106.164	100	2040	80.9844	81.2125	135	0.68438	0.81394	0.94118
	Lysotracker	Distal	PARP1i	Ctrl	Ctrl D3 Lyso PARP1i.tif Lyso.csv	0.82252	1.5	0.31225	0.77223	0.51482	90	1	79.6228	100	1530	0.45625	81.8969	123.69	0.45625	0.66667	1
	Lysotracker	Distal	PARP1i	Ctrl	Ctrl D3 Lyso PARP1i.tif Lyso.csv	0.82252	1.1239	0.31225	0.66845	0.59476	26.565	1	79.6228	100	1530	5.01875	81.8969	146.31	0.68438	0.88976	0.8
	Lysotracker	Distal	PARP1i	Ctrl	Ctrl D3 Lyso PARP1i.tif Lyso.csv	1.53031	1.4747	1.09286	1.43248	0.97137	82.7975	1	278.68	100	5355	30.7969	83.2656	63.435	0.9125	0.67811	0.93333
	Lysotracker	Distal	PARP1i	Ctrl	Ctrl D3 Lyso PARP1i.tif Lyso.csv	1.22849	1.43695	0.72857	1.15455	0.80347	97.9279	0.99252	185.786	100	3570	72.3156	81.8969	111.801	0.9125	0.69592	0.82353
	Lysotracker	Distal	PARP1i	Ctrl	Ctrl D3 Lyso PARP1i.tif Lyso.csv	0.96785	1.03975	0.41633	0.7424	0.71402	0	0.91441	106.164	100	2040	86.2313	82.8094	135	0.68438	0.96177	0.8
	Lysotracker	Distal	PARP1i	Ctrl	Ctrl D3 Lyso PARP1i.tif Lyso.csv	1.96241	1.27031	1.87348	1.74074	1.37033	160.025	0.85737	477.737	100	9180	43.8	83.2656	144.462	1.36875	0.78721	0.86747
	Lysotracker	Distal	PARP1i	Ctrl	Ctrl D3 Lyso PARP1i.tif Lyso.csv	1.33019	1.17119	0.8847	1.14859	0.98071	102.152	0.91096	225.598	100	4335	40.6063	83.95	149.036	1.0825	0.85383	0.80952
	Lysotracker	Distal	PARP1i	Ctrl	Ctrl D3 Lyso PARP1i.tif Lyso.csv	2.46755	1.75535	2.18572	2.21022	1.25913	22.3843	0.59437	557.359	100	10710	100.831	85.0906	33.6901	1.50058	0.56969	0.77064
	Lysotracker	Distal	PARP1i	Ctrl	Ctrl D3 Lyso PARP1i.tif Lyso.csv	2.46755	1.08619	3.69491	2.26052	2.08116	147.307	0.91578	942.203	100	18105	89.1969	83.95	123.69	2.24515	0.92065	0.89308
	Lysotracker	Distal	PARP1i	Ctrl	Ctrl D3 Lyso PARP1i.tif Lyso.csv	1.78171	1.11076	1.35307	1.38333	1.24539	109.356	0.65205	345.032	100	6630	93.9875	85.5469	50.1944	1.36875	0.90029	0.76471
	Lysotracker	Distal	PARP1i	Ctrl	Ctrl D3 Lyso PARP1i.tif Lyso.csv	1.33019	1.43911	0.78062	1.19597	0.83105	80.1006	0.97567	199.057	100	3825	33.5344	85.775	59.0362	0.9125	0.69487	0.85714
	Lysotracker	Distal	PARP1i	Ctrl	Ctrl D3 Lyso PARP1i.tif Lyso.csv	1.44279	1.43486	1.04082	1.37895	0.96103	90	1	265.409	100	5100	64.1031	84.6344	108.435	0.9125	0.69693	0.90909
	Lysotracker	Distal	PARP1i	Ctrl	Ctrl D3 Lyso PARP1i.tif Lyso.csv	1.29047	1.26965	0.78062	1.12335	0.88477	71.565	0.97567	199.057	100	3825	65.2438	85.775	45	0.9125	0.78762	0.85714
	Lysotracker	Distal	PARP1i	Ctrl	Ctrl D3 Lyso PARP1i.tif Lyso.csv	2.34869	2.24171	1.24898	1.88809	0.84226	19.7149	0.44472	318.491	100	6120	83.7219	86.0031	29.0546	1.18788	0.44609	0.60759
	Lysotracker	Distal	PARP1i	Ctrl	Ctrl D3 Lyso PARP1i.tif Lyso.csv	0.82252	1.06885	0.36429	0.7041	0.65875	90	1	92.8932	100	1785	99.4625	84.6344	123.69	0.68438	0.93559	0.875
	Lysotracker	Distal	PARP1i	Ctrl	Ctrl D3 Lyso PARP1i.tif Lyso.csv	1.78171	1.11298	1.71735	1.56002	1.40165	122.361	1	437.925	100	8415	68.6656	84.8625	129.806	1.36875	0.89849	0.90411
	Lysotracker	Distal	PARP1i	Ctrl	Ctrl D3 Lyso PARP1i.tif Lyso.csv	1.44279	1.5119	0.67653	1.1412	0.75481	9.31079	0.67505	172.516	100	3315	96.0406	85.5469	18.435	0.9125	0.66142	0.72222
	Lysotracker	Distal	PARP1i	Ctrl	Ctrl D3 Lyso PARP1i.tif Lyso.csv	1.73735	1.16649	1.71735	1.59708	1.36913	99.3375	1	437.925	100	8415	17.3375	85.3188	113.199	1.36875	0.85727	0.90411
	Lysotracker	Distal	PARP1i	Ctrl	Ctrl D3 Lyso PARP1i.tif Lyso.csv	0.72139	3	0.15612	0.77223	0.25741	90	0.80852	39.8114	100	765	49.0469	86.0031	108.435	0.22813	0.33333	1
	Lysotracker	Distal	PARP1i	Ctrl	Ctrl D4 Lyso PARP1i.tif Lyso.csv	0.94058	1.80907	0.31225	0.84807	0.46879	90	0.80852	79.6228	100	1530	110.184	26.9187	104.036	0.45625	0.55277	0.85714
	Lysotracker	Distal	PARP1i	Ctrl	Ctrl D4 Lyso PARP1i.tif Lyso.csv	0.64524	1.46385	0.15612	0.53943	0.3685	45	1	39.8114	100	765	108.816	27.6031	45	0.45625	0.68313	0.85714
	Lysotracker	Distal	PARP1i	Ctrl	Ctrl D4 Lyso PARP1i.tif Lyso.csv	0.82252	2.70203	0.15612	0.73288	0.27123	61.845	0.64303	39.8114	100	765	37.4125	29.8844	56.3099	0.40831	0.37009	0.66667
	Lysotracker	Distal	PARP1i	Ctrl	Ctrl D4 Lyso PARP1i.tif Lyso.csv	1.46071	1.25004	1.09286	1.31886	1.05506	103.571	0.94307	278.68	100	5355	90.1094	29.2	128.66	1.14063	0.79998	0.85714
	Lysotracker	Distal	PARP1i	Ctrl	Ctrl D4 Lyso PARP1i.tif Lyso.csv	0.96785	1.72675	0.26021	0.75636	0.43802	135	0.67377	66.3523	100	1275	40.3781	29.8844	135	0.64524	0.57912	0.71429
	Lysotracker	Distal	PARP1i	Ctrl	Ctrl D4 Lyso PARP1i.tif Lyso.csv	2.45698	1.37222	2.70613	2.17441	1.58459	31.9197	0.88238	690.064	100	13260	51.1	31.7094	21.8014	1.77257	0.72874	0.86667
	Lysotracker	Distal	PARP1i	Ctrl	Ctrl D4 Lyso PARP1i.tif Lyso.csv	1.02021	1.34027	0.46837	0.89402	0.66704	110.301	1	119.434	100	2295	60.4531	30.5688	116.565	0.68438	0.74612	0.85714
	Lysotracker	Distal	PARP1i	Ctrl	Ctrl D4 Lyso PARP1i.tif Lyso.csv	1.33019	1.33649	0.67653	1.07296	0.80282	41.2303	0.56723	172.516	100	3315	65.7	31.7094	59.0362	0.96785	0.74823	0.68421
	Lysotracker	Distal	PARP1i	Ctrl	Ctrl D4 Lyso PARP1i.tif Lyso.csv	0.82252	1.58114	0.20816	0.64736	0.40942	45.0001	0.69813	53.0819	100	1020	69.8063	31.2531	33.6901	0.61247	0.63246	0.61538
	Lysotracker	Distal	PARP1i	Ctrl	Ctrl D4 Lyso PARP1i.tif Lyso.csv	2.60103	1.34457	3.33063	2.38787	1.77593	174.304	0.85737	849.31	100	16320	5.475	31.7094	164.745	1.825	0.74373	0.87671
	Lysotracker	Distal	PARP1i	Ctrl	Ctrl D4 Lyso PARP1i.tif Lyso.csv	1.46071	1.06766	1.1449	1.24754	1.16848	56.3099	1	291.95	100	5610	78.2469	31.025	128.66	1.14063	0.93663	0.93617
	Lysotracker	Distal	PARP1i	Ctrl	Ctrl D4 Lyso PARP1i.tif Lyso.csv	1.96241	1.30213	1.92552	1.78672	1.37215	47.8171	0.88119	491.007	100	9435	10.2656	33.0781	35.5377	1.53089	0.76797	0.84091
	Lysotracker	Distal	PARP1i	Ctrl	Ctrl D4 Lyso PARP1i.tif Lyso.csv	1.44279	1.76086	0.72857	1.27807	0.72582	177.411	0.81106	185.786	100	3570	31.9375	32.3937	18.435	0.9125	0.5679	0.73684
	Lysotracker	Distal	PARP1i	Ctrl	Ctrl D4 Lyso PARP1i.tif Lyso.csv	1.02021	1.15102	0.41633	0.78111	0.67863	104.036	0.7854	106.164	100	2040	26.4625	32.6219	116.565	0.9125	0.8688	0.64
	Lysotracker	Distal	PARP1i	Ctrl	Ctrl D4 Lyso PARP1i.tif Lyso.csv	0.94058	1.38707	0.36429	0.8021	0.57827	100.901	0.80011	92.8932	100	1785	16.6531	33.0781	104.036	0.68438	0.72094	0.73684
	Lysotracker	Distal	PARP1i	Ctrl	Ctrl D4 Lyso PARP1i.tif Lyso.csv	1.8392	1.0707	1.66531	1.50673	1.40724	75.8205	0.67627	424.655	100	8160	36.5	33.3062	150.255	1.56754	0.93397	0.79012
	Lysotracker	Distal	PARP1i	Ctrl	Ctrl D4 Lyso PARP1i.tif Lyso.csv	1.02021	1.93571	0.36429	0.94754	0.48951	8.34962	0.94327	92.8932	100	1785	88.0563	33.9906	26.565	0.45625	0.51661	0.93333
	Lysotracker	Distal	PARP1i	Ctrl	Ctrl D4 Lyso PARP1i.tif Lyso.csv	1.33019	1.32295	0.67653	1.06751	0.80691	48.5082	0.56723	172.516	100	3315	71.175	34.9031	59.0362	0.96785	0.75588	0.68421
	Lysotracker	Distal	PARP1i	Ctrl	Ctrl D4 Lyso PARP1i.tif Lyso.csv	1.44279	1.41649	0.93674	1.29978	0.91761	77.7642	0.96454	238.868	100	4590	81.8969	35.3594	71.565	0.9125	0.70597	0.87805
	Lysotracker	Distal	PARP1i	Ctrl	Ctrl D4 Lyso PARP1i.tif Lyso.csv	1.22849	1.47564	0.52041	0.98882	0.6701	6.18125	0.88747	132.705	100	2550	62.9625	35.1313	21.8014	0.68438	0.67767	0.8
	Lysotracker	Distal	PARP1i	Ctrl	Ctrl D4 Lyso PARP1i.tif Lyso.csv	1.14063	1.98867	0.41633	1.02673	0.51629	68.6453	0.91441	106.164	100	2040	0.45625	35.8156	53.1301	0.64983	0.50285	0.8
	Lysotracker	Distal	PARP1i	Ctrl	Ctrl D4 Lyso PARP1i.tif Lyso.csv	1.96241	1.40552	1.40511	1.58572	1.12822	26.139	0.7897	358.303	100	6885	29.4281	36.0438	35.5377	1.25417	0.71148	0.80597
	Lysotracker	Distal	PARP1i	Ctrl	Ctrl D4 Lyso PARP1i.tif Lyso.csv	3.67841	1.30927	4.37145	2.69949	2.06183	45.1021	0.51867	1114.72	100	21420	43.3438	88.5125	60.2551	2.34163	0.76379	0.73043
	Lysotracker	Distal	PARP1i	Ctrl	Ctrl D4 Lyso PARP1i.tif Lyso.csv	3.29007	1.20408	5.56839	2.92179	2.42656	148.076	0.82856	1419.94	100	27285	64.1031	86.4594	146.31	2.58094	0.83051	0.87705
	Lysotracker	Distal	PARP1i	Ctrl	Ctrl D4 Lyso PARP1i.tif Lyso.csv	2.29263	1.18017	2.44593	1.91712	1.62444	72.1048	0.72068	623.712	100	11985	55.2063	86.0031	95.7106	1.73151	0.84733	0.79661
	Lysotracker	Distal	PARP1i	Ctrl	Ctrl D4 Lyso PARP1i.tif Lyso.csv	0.64524	1.46385	0.15612	0.53943	0.3685	135	1	39.8114	100	765	45.1688	86.2313	135	0.45625	0.68313	0.85714
	Lysotracker	Distal	PARP1i	Ctrl	Ctrl D4 Lyso PARP1i.tif Lyso.csv	1.8392	1.24991	1.61327	1.60232	1.28194	133.433	0.83834	411.384	100	7905	61.5938	86.6875	119.745	1.45178	0.80006	0.84932
	Lysotracker	Distal	PARP1i	Ctrl	Ctrl D4 Lyso PARP1i.tif Lyso.csv	1.8392	1.16491	1.61327	1.54688	1.32789	131.104	0.88583	411.384	100	7905	104.709	86.9156	119.745	1.45178	0.85843	0.82667
	Lysotracker	Distal	PARP1i	Ctrl	Ctrl D4 Lyso PARP1i.tif Lyso.csv	2.32643	1.06976	2.75817	1.93825	1.81185	96.3087	0.89935	703.335	100	13515	11.4062	89.425	78.6901	1.825	0.93479	0.83465
	Lysotracker	Distal	PARP1i	Ctrl	Ctrl D4 Lyso PARP1i.tif Lyso.csv	1.66078	1.12757	1.40511	1.42031	1.25961	24.1603	0.8363	358.303	100	6885	81.8969	87.6	15.9454	1.36875	0.88686	0.83077
	Lysotracker	Distal	PARP1i	Ctrl	Ctrl D4 Lyso PARP1i.tif Lyso.csv	1.02021	1.12312	0.41633	0.77159	0.687	171.449	0.56715	106.164	100	2040	83.95	87.3719	116.565	0.81663	0.89038	0.64
	Lysotracker	Distal	PARP1i	Ctrl	Ctrl D4 Lyso PARP1i.tif Lyso.csv	0.64524	1.46385	0.15612	0.53943	0.3685	135	1	39.8114	100	765	93.9875	87.3719	135	0.45625	0.68313	0.85714
	Lysotracker	Distal	PARP1i	Ctrl	Ctrl D4 Lyso PARP1i.tif Lyso.csv	1.64503	1.21036	1.40511	1.47152	1.21577	77.5084	1	358.303	100	6885	4.10625	88.9688	56.3099	1.14063	0.8262	0.94737
	Lysotracker	Distal	PARP1i	Ctrl	Ctrl D4 Lyso PARP1i.tif Lyso.csv	1.64503	1.0338	1.35307	1.33454	1.29091	0.55085	0.70313	345.032	100	6630	5.475	88.0563	146.31	1.36875	0.96731	0.8254
	Lysotracker	Distal	PARP1i	Ctrl	Ctrl D4 Lyso PARP1i.tif Lyso.csv	1.78171	1.13666	1.45715	1.45219	1.27759	69.6106	0.7022	371.573	100	7140	69.8063	89.1969	39.8056	1.36875	0.87977	0.8
	Lysotracker	Distal	PARP1i	Ctrl	Ctrl D4 Lyso PARP1i.tif Lyso.csv	1.46071	1.34977	0.78062	1.15825	0.85811	53.7374	0.61155	199.057	100	3825	90.5656	88.9688	51.3402	1.12916	0.74086	0.66667
	Lysotracker	Distal	PARP1i	Ctrl	Ctrl D4 Lyso PARP1i.tif Lyso.csv	0.64524	1	0.20816	0.51482	0.51482	0	1	53.0819	100	1020	98.3219	88.0563	135	0.45625	1	1
	Lysotracker	Distal	PARP1i	Ctrl	Ctrl D4 Lyso PARP1i.tif Lyso.csv	2.45698	1.19282	2.60205	1.98793	1.66658	51.4933	0.53455	663.523	100	12750	99.4625	90.3375	68.1986	2.04157	0.83835	0.71942
	Lysotracker	Distal	PARP1i	Ctrl	Ctrl D4 Lyso PARP1i.tif Lyso.csv	0.82252	1.55299	0.26021	0.71729	0.46188	108.435	1	66.3523	100	1275	16.6531	88.7406	123.69	0.45625	0.64392	0.90909
	Lysotracker	Distal	PARP1i	Ctrl	Ctrl D4 Lyso PARP1i.tif Lyso.csv	2.60103	1.46637	2.70613	2.24777	1.53288	84.0864	0.66041	690.064	100	13260	107.903	89.1969	105.255	1.74674	0.68196	0.79389
	Lysotracker	Distal	PARP1i	Ctrl	Ctrl D4 Lyso PARP1i.tif Lyso.csv	1.73735	1.13019	1.66531	1.54802	1.36971	109.648	0.91441	424.655	100	8160	31.4812	89.8813	156.801	1.51517	0.88481	0.83117
	Lysotracker	Distal	PARP1i	Ctrl	Ctrl D4 Lyso PARP1i.tif Lyso.csv	1.64503	1.60298	0.93674	1.3827	0.86258	82.576	0.68724	238.868	100	4590	77.3344	90.7938	56.3099	0.9125	0.62384	0.81818
	Lysotracker	Distal	PARP1i	Ctrl	Ctrl D4 Lyso PARP1i.tif Lyso.csv	1.33019	1.39248	0.78062	1.17643	0.84485	58.1474	0.97567	199.057	100	3825	23.4969	91.0219	59.0362	0.9125	0.71814	0.88235
	Lysotracker	Distal	PARP1i	Ctrl	Ctrl D4 Lyso PARP1i.tif Lyso.csv	1.73735	1.10218	1.61327	1.50465	1.36516	66.5816	0.9602	411.384	100	7905	98.3219	91.7063	66.8014	1.36875	0.90729	0.87324
	Lysotracker	Distal	PARP1i	Ctrl	Ctrl D4 Lyso PARP1i.tif Lyso.csv	1.02021	1.34027	0.46837	0.89402	0.66704	110.301	1	119.434	100	2295	78.7031	90.3375	116.565	0.68438	0.74612	0.85714
	Lysotracker	Distal	PARP1i	Ctrl	Ctrl D5 Lyso PARP1i.tif Lyso.csv	1.61309	1.19229	1.1449	1.31835	1.10573	116.633	0.7682	291.95	100	5610	19.1625	23.725	135	1.29047	0.83872	0.77193
	Lysotracker	Distal	PARP1i	Ctrl	Ctrl D5 Lyso PARP1i.tif Lyso.csv	0.94058	4	0.20816	1.02965	0.25741	90	0.64492	53.0819	100	1020	0	23.9531	104.036	0.22813	0.25	1
	Lysotracker	Distal	PARP1i	Ctrl	Ctrl D5 Lyso PARP1i.tif Lyso.csv	0.94058	1.38707	0.36429	0.8021	0.57827	79.0993	0.80011	92.8932	100	1785	69.1219	24.6375	104.036	0.68438	0.72094	0.73684
	Lysotracker	Distal	PARP1i	Ctrl	Ctrl D5 Lyso PARP1i.tif Lyso.csv	0.82252	1.06885	0.36429	0.7041	0.65875	90	1	92.8932	100	1785	10.95	24.8656	123.69	0.68438	0.93559	0.875
	Lysotracker	Distal	PARP1i	Ctrl	Ctrl D5 Lyso PARP1i.tif Lyso.csv	1.93571	1.34084	1.56123	1.63259	1.21759	54.2377	0.95202	398.114	100	7650	84.4063	26.2344	45	1.36875	0.7458	0.92308
	Lysotracker	Distal	PARP1i	Ctrl	Ctrl D5 Lyso PARP1i.tif Lyso.csv	1.8392	1.21835	1.71735	1.63219	1.33967	80.8745	0.94298	437.925	100	8415	4.33438	25.0938	97.125	1.36875	0.82078	0.84615
	Lysotracker	Distal	PARP1i	Ctrl	Ctrl D5 Lyso PARP1i.tif Lyso.csv	0.82252	2.70203	0.15612	0.73288	0.27123	61.845	0.64303	39.8114	100	765	41.7469	26.9187	56.3099	0.40831	0.37009	0.66667
	Lysotracker	Distal	PARP1i	Ctrl	Ctrl D5 Lyso PARP1i.tif Lyso.csv	4.19403	1.76361	7.12962	4.00119	2.26875	157.025	0.61825	1818.05	100	34935	60.4531	27.375	157.62	2.67006	0.56702	0.81791
	Lysotracker	Distal	PARP1i	Ctrl	Ctrl D5 Lyso PARP1i.tif Lyso.csv	1.02021	1.6053	0.41633	0.92247	0.57464	70.6701	0.91441	106.164	100	2040	7.75625	27.6031	63.435	0.68438	0.62294	0.8
	Lysotracker	Distal	PARP1i	Ctrl	Ctrl D5 Lyso PARP1i.tif Lyso.csv	1.14063	1.28124	0.62449	1.00933	0.78778	32.0668	1	159.246	100	3060	28.2875	27.6031	36.8699	0.9125	0.78049	0.85714
	Lysotracker	Distal	PARP1i	Ctrl	Ctrl D5 Lyso PARP1i.tif Lyso.csv	2.24677	1.45984	2.28981	2.06304	1.41319	162.707	0.83072	583.9	100	11220	29.2	27.8313	156.038	1.56754	0.68501	0.85437
	Lysotracker	Distal	PARP1i	Ctrl	Ctrl D5 Lyso PARP1i.tif Lyso.csv	1.88117	1.87466	1.19694	1.69026	0.90163	100.126	0.65723	305.221	100	5865	38.5531	27.375	104.036	1.12257	0.53343	0.77966
	Lysotracker	Distal	PARP1i	Ctrl	Ctrl D5 Lyso PARP1i.tif Lyso.csv	1.64503	1.20079	1.09286	1.29262	1.07647	96.5115	0.7524	278.68	100	5355	64.5594	27.8313	123.69	1.14063	0.83278	0.82353
	Lysotracker	Distal	PARP1i	Ctrl	Ctrl D5 Lyso PARP1i.tif Lyso.csv	1.53031	1.59732	0.8847	1.34137	0.83976	69.2882	0.91096	225.598	100	4335	44.7125	79.6156	63.435	0.9125	0.62605	0.85
	Lysotracker	Distal	PARP1i	Ctrl	Ctrl D5 Lyso PARP1i.tif Lyso.csv	2.77526	1.20176	3.69491	2.37775	1.97856	112.748	0.82579	942.203	100	18105	59.7688	80.9844	80.5377	2.04157	0.83211	0.85542
	Lysotracker	Distal	PARP1i	Ctrl	Ctrl D5 Lyso PARP1i.tif Lyso.csv	0.82252	1.22334	0.26021	0.63663	0.5204	90	0.76359	66.3523	100	1275	78.7031	79.1594	123.69	0.68438	0.81744	0.71429
	Lysotracker	Distal	PARP1i	Ctrl	Ctrl D5 Lyso PARP1i.tif Lyso.csv	2.8584	1.93613	3.07042	2.7512	1.42097	17.3408	0.70694	782.957	100	15045	45.3969	80.9844	28.6105	1.63013	0.51649	0.81944
	Lysotracker	Distal	PARP1i	Ctrl	Ctrl D5 Lyso PARP1i.tif Lyso.csv	1.53031	1.2493	1.1449	1.3495	1.0802	90.1432	0.98798	291.95	100	5610	85.3188	79.3875	116.565	1.14063	0.80045	0.86275
	Lysotracker	Distal	PARP1i	Ctrl	Ctrl D5 Lyso PARP1i.tif Lyso.csv	2.75645	1.19048	4.00716	2.46453	2.0702	61.309	0.76971	1021.83	100	19635	96.0406	81.8969	65.556	2.25832	0.84	0.86517
	Lysotracker	Distal	PARP1i	Ctrl	Ctrl D5 Lyso PARP1i.tif Lyso.csv	2.15213	1.26248	2.18572	1.87441	1.4847	41.7976	0.58481	557.359	100	10710	0	81.2125	32.0054	1.825	0.79209	0.80769
	Lysotracker	Distal	PARP1i	Ctrl	Ctrl D5 Lyso PARP1i.tif Lyso.csv	1.53031	1.22197	1.24898	1.394	1.14078	70.3951	1	318.491	100	6120	57.2594	80.9844	63.435	1.14063	0.81835	0.90566
	Lysotracker	Distal	PARP1i	Ctrl	Ctrl D5 Lyso PARP1i.tif Lyso.csv	1.22849	1.21121	0.72857	1.05999	0.87515	100.097	0.91063	185.786	100	3570	106.991	82.125	111.801	0.9125	0.82562	0.84848
	Lysotracker	Distal	PARP1i	Ctrl	Ctrl D5 Lyso PARP1i.tif Lyso.csv	1.14063	1.49198	0.41633	0.88931	0.59606	60.1282	0.7854	106.164	100	2040	42.2031	83.2656	53.1301	0.68438	0.67025	0.7619
	Lysotracker	Distal	PARP1i	Ctrl	Ctrl D5 Lyso PARP1i.tif Lyso.csv	2.04041	1.15335	2.39389	1.87494	1.62565	107.262	1	610.441	100	11730	98.0938	82.5813	116.565	1.59688	0.86704	0.92929
	Lysotracker	Distal	PARP1i	Ctrl	Ctrl D5 Lyso PARP1i.tif Lyso.csv	1.64503	1.19179	1.19694	1.3477	1.13081	104.221	0.75572	305.221	100	5865	45.1688	83.0375	123.69	1.14063	0.83907	0.83636
	Lysotracker	Distal	PARP1i	Ctrl	Ctrl D5 Lyso PARP1i.tif Lyso.csv	1.64503	1.17593	1.30103	1.39569	1.18688	88.1372	0.82144	331.762	100	6375	48.3625	83.2656	123.69	1.14063	0.85039	0.87719
	Lysotracker	Distal	PARP1i	Ctrl	Ctrl D5 Lyso PARP1i.tif Lyso.csv	2.10321	1.07155	2.49797	1.8461	1.72283	132.778	0.96737	636.982	100	12240	82.5813	83.7219	130.601	1.825	0.93323	0.88889
	Lysotracker	Distal	PARP1i	Ctrl	Ctrl D5 Lyso PARP1i.tif Lyso.csv	1.64503	1.076	1.50919	1.43791	1.33635	168.251	0.89825	384.843	100	7395	91.7063	83.4938	123.69	1.36875	0.92937	0.89231
	Lysotracker	Distal	PARP1i	Ctrl	Ctrl D5 Lyso PARP1i.tif Lyso.csv	1.02021	1.5362	0.46837	0.95713	0.62305	96.0474	1	119.434	100	2295	75.7375	84.1781	116.565	0.68438	0.65096	0.85714
	Lysotracker	Distal	PARP1i	Ctrl	Ctrl D5 Lyso PARP1i.tif Lyso.csv	1.53031	1.22887	1.09286	1.30765	1.06411	7.43268	0.88034	278.68	100	5355	16.1969	84.8625	153.435	1.14063	0.81376	0.82353
	Lysotracker	Distal	PARP1i	Ctrl	Ctrl D5 Lyso PARP1i.tif Lyso.csv	1.64503	1.55427	1.09286	1.47062	0.94618	29.1493	0.88034	278.68	100	5355	46.5375	85.775	33.6901	1.0825	0.64339	0.84
	Lysotracker	Distal	PARP1i to distal	Ctrl	Ctrl D1 Lyso PARP1i to distal.tif Lyso.csv	1.53031	1.15395	1.30103	1.38259	1.19813	145.617	0.95449	331.762	100	6375	104.253	28.0594	116.565	1.29047	0.86659	0.87719
	Lysotracker	Distal	PARP1i to distal	Ctrl	Ctrl D1 Lyso PARP1i to distal.tif Lyso.csv	0.72139	1.4676	0.20816	0.62368	0.42497	90	0.85737	53.0819	100	1020	57.4875	29.4281	108.435	0.45625	0.68139	0.8
	Lysotracker	Distal	PARP1i to distal	Ctrl	Ctrl D1 Lyso PARP1i to distal.tif Lyso.csv	0.94058	1.37649	0.31225	0.73976	0.53742	165.964	0.58905	79.6228	100	1530	62.9625	30.1125	165.964	0.68438	0.72648	0.63158
	Lysotracker	Distal	PARP1i to distal	Ctrl	Ctrl D1 Lyso PARP1i to distal.tif Lyso.csv	2.16418	1.52092	1.92552	1.931	1.26962	23.9003	0.69856	491.007	100	9435	88.5125	31.025	18.435	1.45178	0.65749	0.81319
	Lysotracker	Distal	PARP1i to distal	Ctrl	Ctrl D1 Lyso PARP1i to distal.tif Lyso.csv	1.46071	1.19614	0.8847	1.16076	0.97042	177.828	0.76344	225.598	100	4335	84.6344	30.3406	141.34	0.9125	0.83602	0.87179
	Lysotracker	Distal	PARP1i to distal	Ctrl	Ctrl D1 Lyso PARP1i to distal.tif Lyso.csv	1.53031	1.39836	1.09286	1.39491	0.99753	8.35925	0.88034	278.68	100	5355	93.3031	30.3406	153.435	1.14063	0.71512	0.84
	Lysotracker	Distal	PARP1i to distal	Ctrl	Ctrl D1 Lyso PARP1i to distal.tif Lyso.csv	0.72139	3	0.15612	0.77223	0.25741	90	0.80852	39.8114	100	765	81.2125	30.5688	108.435	0.22813	0.33333	1
	Lysotracker	Distal	PARP1i to distal	Ctrl	Ctrl D1 Lyso PARP1i to distal.tif Lyso.csv	1.88117	2.32654	0.93674	1.66579	0.71599	174.44	0.59143	238.868	100	4590	59.9969	31.2531	165.964	0.9125	0.42982	0.69231
	Lysotracker	Distal	PARP1i to distal	Ctrl	Ctrl D1 Lyso PARP1i to distal.tif Lyso.csv	2.46755	2.33388	1.45715	2.08088	0.8916	142.669	0.50543	371.573	100	7140	0.22813	31.9375	146.31	1.22552	0.42847	0.72727
	Lysotracker	Distal	PARP1i to distal	Ctrl	Ctrl D1 Lyso PARP1i to distal.tif Lyso.csv	1.22849	1.21489	0.67653	1.02298	0.84204	153.435	0.92163	172.516	100	3315	29.8844	31.9375	158.199	0.9125	0.82312	0.78788
	Lysotracker	Distal	PARP1i to distal	Ctrl	Ctrl D1 Lyso PARP1i to distal.tif Lyso.csv	1.64503	1.25797	1.1449	1.35417	1.07647	147.426	0.92226	291.95	100	5610	51.7844	31.9375	146.31	1.14063	0.79493	0.86275
	Lysotracker	Distal	PARP1i to distal	Ctrl	Ctrl D1 Lyso PARP1i to distal.tif Lyso.csv	1.14063	1.15921	0.67653	0.99926	0.86202	135	1	172.516	100	3315	39.0094	31.9375	126.87	0.9125	0.86266	0.89655
	Lysotracker	Distal	PARP1i to distal	Ctrl	Ctrl D1 Lyso PARP1i to distal.tif Lyso.csv	1.8392	1.42105	1.45715	1.62372	1.14262	7.07739	0.75721	371.573	100	7140	45.8531	33.0781	29.7449	1.36875	0.70371	0.8
	Lysotracker	Distal	PARP1i to distal	Ctrl	Ctrl D1 Lyso PARP1i to distal.tif Lyso.csv	1.46071	1.06766	1.1449	1.24754	1.16848	146.31	1	291.95	100	5610	67.7531	31.9375	128.66	1.14063	0.93663	0.93617
	Lysotracker	Distal	PARP1i to distal	Ctrl	Ctrl D1 Lyso PARP1i to distal.tif Lyso.csv	0.72139	1.5667	0.15612	0.55806	0.3562	90	0.5236	39.8114	100	765	13.2312	32.1656	108.435	0.45625	0.63828	0.6
	Lysotracker	Distal	PARP1i to distal	Ctrl	Ctrl D1 Lyso PARP1i to distal.tif Lyso.csv	1.46071	1.12488	1.19694	1.30932	1.16396	32.5629	0.93771	305.221	100	5865	49.5031	33.9906	38.6598	1.29047	0.88898	0.82143
	Lysotracker	Distal	PARP1i to distal	Ctrl	Ctrl D1 Lyso PARP1i to distal.tif Lyso.csv	0.82252	1.55299	0.26021	0.71729	0.46188	18.435	1	66.3523	100	1275	3.65	33.7625	33.6901	0.45625	0.64392	0.90909
	Lysotracker	Distal	PARP1i to distal	Ctrl	Ctrl D1 Lyso PARP1i to distal.tif Lyso.csv	0.96785	1.22859	0.41633	0.80701	0.65686	45.0002	1	106.164	100	2040	88.5125	34.2188	45	0.68438	0.81394	0.94118
	Lysotracker	Distal	PARP1i to distal	Ctrl	Ctrl D1 Lyso PARP1i to distal.tif Lyso.csv	0.96785	1.22859	0.41633	0.80701	0.65686	135	1	106.164	100	2040	30.5688	33.7625	135	0.68438	0.81394	0.94118
	Lysotracker	Distal	PARP1i to distal	Ctrl	Ctrl D1 Lyso PARP1i to distal.tif Lyso.csv	1.16321	1.4134	0.52041	0.96774	0.68469	178.41	0.70894	132.705	100	2550	95.5844	34.4469	168.69	0.9125	0.70752	0.68966
	Lysotracker	Distal	PARP1i to distal	Ctrl	Ctrl D1 Lyso PARP1i to distal.tif Lyso.csv	1.66078	1.85536	1.09286	1.60676	0.86601	177.985	0.94307	278.68	100	5355	7.52813	35.5875	164.055	0.9125	0.53898	0.85714
	Lysotracker	Distal	PARP1i to distal	Ctrl	Ctrl D1 Lyso PARP1i to distal.tif Lyso.csv	1.02021	1.1852	0.46837	0.84071	0.70934	7.62756	1	119.434	100	2295	74.3688	87.1438	26.565	0.68438	0.84374	0.85714
	Lysotracker	Distal	PARP1i to distal	Ctrl	Ctrl D1 Lyso PARP1i to distal.tif Lyso.csv	1.14063	1.15921	0.67653	0.99926	0.86202	135	1	172.516	100	3315	66.6125	86.9156	126.87	0.9125	0.86266	0.89655
	Lysotracker	Distal	PARP1i to distal	Ctrl	Ctrl D1 Lyso PARP1i to distal.tif Lyso.csv	1.02021	1.55368	0.41633	0.90751	0.58411	24.407	0.91441	106.164	100	2040	68.4375	87.6	26.565	0.68438	0.64363	0.8
	Lysotracker	Distal	PARP1i to distal	Ctrl	Ctrl D1 Lyso PARP1i to distal.tif Lyso.csv	1.64503	1.05732	1.50919	1.42538	1.3481	8.49541	0.97696	384.843	100	7395	0.45625	87.6	146.31	1.36875	0.94578	0.89231
	Lysotracker	Distal	PARP1i to distal	Ctrl	Ctrl D1 Lyso PARP1i to distal.tif Lyso.csv	2.15213	1.26244	2.28981	1.91849	1.51967	173.963	0.79425	583.9	100	11220	8.2125	87.6	147.995	1.59688	0.79212	0.86275
	Lysotracker	Distal	PARP1i to distal	Ctrl	Ctrl D1 Lyso PARP1i to distal.tif Lyso.csv	2.32643	1.26753	2.28981	1.92235	1.51662	3.98088	0.67468	583.9	100	11220	58.1719	87.8281	168.69	1.59688	0.78894	0.81481
	Lysotracker	Distal	PARP1i to distal	Ctrl	Ctrl D1 Lyso PARP1i to distal.tif Lyso.csv	1.14063	1.14747	0.57245	0.91453	0.79699	140.31	0.97622	145.975	100	2805	73.6844	87.3719	126.87	0.9125	0.87148	0.81481
	Lysotracker	Distal	PARP1i to distal	Ctrl	Ctrl D1 Lyso PARP1i to distal.tif Lyso.csv	1.78171	1.31893	1.35307	1.50739	1.14289	40.3945	0.85429	345.032	100	6630	46.3094	88.9688	39.8056	1.29047	0.75819	0.85246
	Lysotracker	Distal	PARP1i to distal	Ctrl	Ctrl D1 Lyso PARP1i to distal.tif Lyso.csv	0.82252	1.29099	0.31225	0.71642	0.55493	135	1	79.6228	100	1530	28.5156	87.8281	123.69	0.64524	0.7746	0.8
	Lysotracker	Distal	PARP1i to distal	Ctrl	Ctrl D1 Lyso PARP1i to distal.tif Lyso.csv	4.65286	2.27693	7.02554	4.51305	1.98207	177.57	0.67093	1791.51	100	34425	61.5938	88.2844	168.69	2.18021	0.43919	0.86817
	Lysotracker	Distal	PARP1i to distal	Ctrl	Ctrl D1 Lyso PARP1i to distal.tif Lyso.csv	1.66078	1.35858	0.98878	1.30782	0.96264	165.299	0.72542	252.139	100	4845	20.9875	88.9688	164.055	1.14063	0.73607	0.71698
	Lysotracker	Distal	PARP1i to distal	Ctrl	Ctrl D1 Lyso PARP1i to distal.tif Lyso.csv	1.44279	1.86449	0.67653	1.2673	0.6797	18.6104	0.75313	172.516	100	3315	37.8688	89.1969	18.435	0.81663	0.53634	0.74286
	Lysotracker	Distal	PARP1i to distal	Ctrl	Ctrl D1 Lyso PARP1i to distal.tif Lyso.csv	1.8392	1.42675	1.24898	1.50629	1.05575	31.2859	0.64904	318.491	100	6120	77.1063	89.8813	29.7449	1.32673	0.70089	0.71642
	Lysotracker	Distal	PARP1i to distal	Ctrl	Ctrl D1 Lyso PARP1i to distal.tif Lyso.csv	0.72139	1.4676	0.20816	0.62368	0.42497	0	1	53.0819	100	1020	5.70313	88.9688	161.565	0.45625	0.68139	0.8
	Lysotracker	Distal	PARP1i to distal	Ctrl	Ctrl D1 Lyso PARP1i to distal.tif Lyso.csv	1.02021	1.23565	0.52041	0.90485	0.73229	0	1	132.705	100	2550	32.3937	89.1969	153.435	0.68438	0.80929	0.90909
	Lysotracker	Distal	PARP1i to distal	Ctrl	Ctrl D1 Lyso PARP1i to distal.tif Lyso.csv	0.64524	1	0.20816	0.51482	0.51482	0	1	53.0819	100	1020	36.2719	89.425	135	0.45625	1	1
	Lysotracker	Distal	PARP1i to distal	Ctrl	Ctrl D2 Lyso PARP1i to distal.tif Lyso.csv	1.02021	1.41576	0.41633	0.8663	0.6119	172.982	0.91441	106.164	100	2040	114.519	33.7625	153.435	0.68438	0.70633	0.8
	Lysotracker	Distal	PARP1i to distal	Ctrl	Ctrl D2 Lyso PARP1i to distal.tif Lyso.csv	1.9491	1.22288	2.0296	1.77767	1.45368	87.7646	0.99962	517.548	100	9945	33.7625	35.5875	69.444	1.36875	0.81774	0.91765
	Lysotracker	Distal	PARP1i to distal	Ctrl	Ctrl D2 Lyso PARP1i to distal.tif Lyso.csv	1.64503	1.12217	1.24898	1.33587	1.19043	58.9121	0.74338	318.491	100	6120	96.2688	35.8156	56.3099	1.14063	0.89113	0.85714
	Lysotracker	Distal	PARP1i to distal	Ctrl	Ctrl D2 Lyso PARP1i to distal.tif Lyso.csv	0.64524	1.46385	0.15612	0.53943	0.3685	135	1	39.8114	100	765	9.80938	34.675	135	0.45625	0.68313	0.85714
	Lysotracker	Distal	PARP1i to distal	Ctrl	Ctrl D2 Lyso PARP1i to distal.tif Lyso.csv	0.94058	2.18816	0.26021	0.85144	0.38911	5.15242	0.76359	66.3523	100	1275	10.95	34.675	165.964	0.45625	0.45701	0.76923
	Lysotracker	Distal	PARP1i to distal	Ctrl	Ctrl D2 Lyso PARP1i to distal.tif Lyso.csv	1.14063	1.15921	0.67653	0.99926	0.86202	45	1	172.516	100	3315	80.3	35.3594	36.8699	0.9125	0.86266	0.89655
	Lysotracker	Distal	PARP1i to distal	Ctrl	Ctrl D2 Lyso PARP1i to distal.tif Lyso.csv	0.82252	2	0.20816	0.72807	0.36403	18.435	1	53.0819	100	1020	75.0531	35.3594	33.6901	0.45625	0.5	0.8
	Lysotracker	Distal	PARP1i to distal	Ctrl	Ctrl D2 Lyso PARP1i to distal.tif Lyso.csv	1.8392	1.17546	1.40511	1.45015	1.23369	58.9784	0.45816	358.303	100	6885	47.9063	35.5875	172.875	1.59688	0.85073	0.64286
	Lysotracker	Distal	PARP1i to distal	Ctrl	Ctrl D2 Lyso PARP1i to distal.tif Lyso.csv	3.06062	1.35172	3.85104	2.57447	1.90458	156.727	0.68406	982.014	100	18870	81.6688	35.8156	153.435	2.05313	0.7398	0.83616
	Lysotracker	Distal	PARP1i to distal	Ctrl	Ctrl D2 Lyso PARP1i to distal.tif Lyso.csv	1.14063	1.37205	0.57245	1.00002	0.72885	164.929	1	145.975	100	2805	91.4781	35.3594	143.13	0.68438	0.72883	0.95652
	Lysotracker	Distal	PARP1i to distal	Ctrl	Ctrl D2 Lyso PARP1i to distal.tif Lyso.csv	0.96785	1.22859	0.41633	0.80701	0.65686	135	1	106.164	100	2040	87.6	35.5875	135	0.68438	0.81394	0.94118
	Lysotracker	Distal	PARP1i to distal	Ctrl	Ctrl D2 Lyso PARP1i to distal.tif Lyso.csv	2.3817	1.24235	2.96634	2.16614	1.74359	5.85758	0.91092	756.416	100	14535	56.1188	37.1844	16.6992	1.825	0.80493	0.87692
	Lysotracker	Distal	PARP1i to distal	Ctrl	Ctrl D2 Lyso PARP1i to distal.tif Lyso.csv	3.71361	2.02844	4.68369	3.47801	1.71462	179.007	0.78151	1194.34	100	22950	1.36875	36.7281	169.38	1.825	0.49299	0.8867
	Lysotracker	Distal	PARP1i to distal	Ctrl	Ctrl D2 Lyso PARP1i to distal.tif Lyso.csv	1.78171	1.21784	1.56123	1.55591	1.2776	135.772	0.92922	398.114	100	7650	6.15938	36.0438	129.806	1.36875	0.82113	0.85714
	Lysotracker	Distal	PARP1i to distal	Ctrl	Ctrl D2 Lyso PARP1i to distal.tif Lyso.csv	1.38763	2.05338	0.57245	1.22337	0.59578	87.69	0.65879	145.975	100	2805	0	36.5	99.4623	0.68438	0.487	0.81481
	Lysotracker	Distal	PARP1i to distal	Ctrl	Ctrl D2 Lyso PARP1i to distal.tif Lyso.csv	1.22849	1.04446	0.8847	1.08467	1.0385	90	1	225.598	100	4335	88.2844	36.5	111.801	1.12916	0.95744	0.85
	Lysotracker	Distal	PARP1i to distal	Ctrl	Ctrl D2 Lyso PARP1i to distal.tif Lyso.csv	3.16921	1.41784	4.31941	2.79242	1.96949	47.1313	0.71162	1101.45	100	21165	69.5781	39.4656	59.7436	2.25832	0.7053	0.7757
	Lysotracker	Distal	PARP1i to distal	Ctrl	Ctrl D2 Lyso PARP1i to distal.tif Lyso.csv	2.3817	1.75782	2.08164	2.15847	1.22792	95.5632	0.65045	530.819	100	10200	96.4969	36.7281	106.699	1.36875	0.56889	0.80808
	Lysotracker	Distal	PARP1i to distal	Ctrl	Ctrl D2 Lyso PARP1i to distal.tif Lyso.csv	1.22849	1.04446	0.8847	1.08467	1.0385	0	0.98486	225.598	100	4335	110.641	36.7281	111.801	1.12916	0.95744	0.85
	Lysotracker	Distal	PARP1i to distal	Ctrl	Ctrl D2 Lyso PARP1i to distal.tif Lyso.csv	0.72139	1.4676	0.20816	0.62368	0.42497	90	0.85737	53.0819	100	1020	99.2344	38.0969	108.435	0.45625	0.68139	0.8
	Lysotracker	Distal	PARP1i to distal	Ctrl	Ctrl D2 Lyso PARP1i to distal.tif Lyso.csv	1.66078	1.5765	1.19694	1.55002	0.98321	87.81	0.96418	305.221	100	5865	9.58125	40.3781	74.0546	0.9125	0.63432	0.90196
	Lysotracker	Distal	PARP1i to distal	Ctrl	Ctrl D2 Lyso PARP1i to distal.tif Lyso.csv	1.22849	1.29482	0.78062	1.13443	0.87613	99.4623	1	199.057	100	3825	67.525	90.5656	111.801	0.9125	0.77231	0.85714
	Lysotracker	Distal	PARP1i to distal	Ctrl	Ctrl D2 Lyso PARP1i to distal.tif Lyso.csv	2.04041	2.00606	1.35307	1.85903	0.92671	59.2595	0.48178	345.032	100	6630	109.5	93.075	63.435	1.12373	0.49849	0.71233
	Lysotracker	Distal	PARP1i to distal	Ctrl	Ctrl D2 Lyso PARP1i to distal.tif Lyso.csv	1.53031	1.16307	1.24898	1.35999	1.16931	2.64961	1	318.491	100	6120	106.763	92.1625	153.435	1.14063	0.85979	0.88889
	Lysotracker	Distal	PARP1i to distal	Ctrl	Ctrl D2 Lyso PARP1i to distal.tif Lyso.csv	1.8392	1.05107	1.97756	1.6268	1.54776	17.7688	0.97399	504.278	100	9690	71.8594	92.6188	150.255	1.59688	0.95141	0.89412
	Lysotracker	Distal	PARP1i to distal	Ctrl	Ctrl D2 Lyso PARP1i to distal.tif Lyso.csv	1.14063	1.54227	0.46837	0.95902	0.62183	35.7825	1	119.434	100	2295	33.9906	93.075	36.8699	0.68438	0.6484	0.85714
	Lysotracker	Distal	PARP1i to distal	Ctrl	Ctrl D2 Lyso PARP1i to distal.tif Lyso.csv	1.44279	1.41649	0.93674	1.29978	0.91761	12.2358	0.96454	238.868	100	4590	38.325	93.075	18.435	0.9125	0.70597	0.87805
	Lysotracker	Distal	PARP1i to distal	Ctrl	Ctrl D2 Lyso PARP1i to distal.tif Lyso.csv	0.82252	1.49607	0.26021	0.70403	0.47058	124.099	0.87266	66.3523	100	1275	101.744	92.8469	123.69	0.61247	0.66842	0.71429
	Lysotracker	Distal	PARP1i to distal	Ctrl	Ctrl D2 Lyso PARP1i to distal.tif Lyso.csv	1.02021	1.93571	0.36429	0.94754	0.48951	171.65	1	92.8932	100	1785	8.2125	93.075	153.435	0.45625	0.51661	0.93333
	Lysotracker	Distal	PARP1i to distal	Ctrl	Ctrl D2 Lyso PARP1i to distal.tif Lyso.csv	2.28125	1.50399	2.28981	2.094	1.3923	172.26	0.76012	583.9	100	11220	95.3563	93.075	143.13	1.59688	0.6649	0.84615
	Lysotracker	Distal	PARP1i to distal	Ctrl	Ctrl D2 Lyso PARP1i to distal.tif Lyso.csv	3.29007	2.72926	2.55001	2.97679	1.0907	25.0961	0.55819	650.253	100	12495	0	95.1281	33.6901	1.49485	0.3664	0.74242
	Lysotracker	Distal	PARP1i to distal	Ctrl	Ctrl D2 Lyso PARP1i to distal.tif Lyso.csv	1.14063	1.09279	0.67653	0.97022	0.88783	120.964	1	172.516	100	3315	3.19375	93.3031	126.87	0.9125	0.91509	0.89655
	Lysotracker	Distal	PARP1i to distal	Ctrl	Ctrl D2 Lyso PARP1i to distal.tif Lyso.csv	2.10321	1.4515	1.7694	1.80833	1.24583	2.69744	0.85267	451.196	100	8670	18.0219	93.7594	167.471	1.36875	0.68894	0.81928
	Lysotracker	Distal	PARP1i to distal	Ctrl	Ctrl D2 Lyso PARP1i to distal.tif Lyso.csv	1.64503	1.06293	1.50919	1.42915	1.34454	149.324	0.97696	384.843	100	7395	75.9656	95.3563	146.31	1.36875	0.9408	0.89231
	Lysotracker	Distal	PARP1i to distal	Ctrl	Ctrl D2 Lyso PARP1i to distal.tif Lyso.csv	1.61309	1.12289	1.30103	1.36385	1.21459	156.419	0.98055	331.762	100	6375	92.1625	95.1281	135	1.14063	0.89056	0.90909
	Lysotracker	Distal	PARP1i to distal	Ctrl	Ctrl D3 Lyso PARP1i to distal.tif Lyso.csv	1.64503	1.06445	1.50919	1.43017	1.34359	145.305	1	384.843	100	7395	81.6688	29.6562	146.31	1.36875	0.93946	0.90625
	Lysotracker	Distal	PARP1i to distal	Ctrl	Ctrl D3 Lyso PARP1i to distal.tif Lyso.csv	3.54145	2.23943	3.69491	3.24583	1.4494	167.013	0.50721	942.203	100	18105	85.0906	30.1125	165.069	1.73237	0.44654	0.72449
	Lysotracker	Distal	PARP1i to distal	Ctrl	Ctrl D3 Lyso PARP1i to distal.tif Lyso.csv	1.44279	1.93115	0.83266	1.43085	0.74094	0	0.95824	212.327	100	4080	104.025	30.1125	161.565	0.68438	0.51783	0.94118
	Lysotracker	Distal	PARP1i to distal	Ctrl	Ctrl D3 Lyso PARP1i to distal.tif Lyso.csv	1.33019	1.26316	0.8847	1.19284	0.94433	164.828	1	225.598	100	4335	54.2938	30.5688	149.036	0.9125	0.79166	0.91892
	Lysotracker	Distal	PARP1i to distal	Ctrl	Ctrl D3 Lyso PARP1i to distal.tif Lyso.csv	1.14063	1.15921	0.67653	0.99926	0.86202	135	1	172.516	100	3315	90.7938	30.3406	126.87	0.9125	0.86266	0.89655
	Lysotracker	Distal	PARP1i to distal	Ctrl	Ctrl D3 Lyso PARP1i to distal.tif Lyso.csv	0.82252	1.5	0.31225	0.77223	0.51482	0	1	79.6228	100	1530	92.3906	31.025	146.31	0.45625	0.66667	1
	Lysotracker	Distal	PARP1i to distal	Ctrl	Ctrl D3 Lyso PARP1i to distal.tif Lyso.csv	2.3817	1.54093	2.18572	2.07083	1.34388	8.89644	0.75815	557.359	100	10710	71.175	31.7094	163.301	1.49425	0.64896	0.79245
	Lysotracker	Distal	PARP1i to distal	Ctrl	Ctrl D3 Lyso PARP1i to distal.tif Lyso.csv	1.02021	2.15225	0.26021	0.84442	0.39234	105.482	0.5715	66.3523	100	1275	82.125	31.7094	116.565	0.45625	0.46463	0.71429
	Lysotracker	Distal	PARP1i to distal	Ctrl	Ctrl D3 Lyso PARP1i to distal.tif Lyso.csv	1.29047	1.31898	0.72857	1.10614	0.83863	45.0002	1	185.786	100	3570	55.2063	32.85	45	0.9125	0.75816	0.93333
	Lysotracker	Distal	PARP1i to distal	Ctrl	Ctrl D3 Lyso PARP1i to distal.tif Lyso.csv	1.46071	1.24393	0.98878	1.25142	1.00602	147.467	1	252.139	100	4845	84.4063	31.9375	141.34	1.12916	0.80391	0.88372
	Lysotracker	Distal	PARP1i to distal	Ctrl	Ctrl D3 Lyso PARP1i to distal.tif Lyso.csv	1.14063	1.01986	0.72857	0.97266	0.95372	2.771e-13	1	185.786	100	3570	106.991	32.1656	126.87	0.9125	0.98052	0.93333
	Lysotracker	Distal	PARP1i to distal	Ctrl	Ctrl D3 Lyso PARP1i to distal.tif Lyso.csv	1.46071	1.07617	1.24898	1.3082	1.21561	90	1	318.491	100	6120	43.5719	32.6219	128.66	1.14063	0.92922	0.88889
	Lysotracker	Distal	PARP1i to distal	Ctrl	Ctrl D3 Lyso PARP1i to distal.tif Lyso.csv	0.96785	1	0.46837	0.77223	0.77223	0	1	119.434	100	2295	45.625	32.6219	135	0.68438	1	1
	Lysotracker	Distal	PARP1i to distal	Ctrl	Ctrl D3 Lyso PARP1i to distal.tif Lyso.csv	0.82252	1.06885	0.36429	0.7041	0.65875	90	1	92.8932	100	1785	11.1781	32.85	123.69	0.68438	0.93559	0.875
	Lysotracker	Distal	PARP1i to distal	Ctrl	Ctrl D3 Lyso PARP1i to distal.tif Lyso.csv	1.46071	1.00802	1.19694	1.23944	1.22958	90	1	305.221	100	5865	37.8688	32.85	128.66	1.14063	0.99205	0.95833
	Lysotracker	Distal	PARP1i to distal	Ctrl	Ctrl D3 Lyso PARP1i to distal.tif Lyso.csv	0.64524	1	0.20816	0.51482	0.51482	0	1	53.0819	100	1020	46.5375	32.85	135	0.45625	1	1
	Lysotracker	Distal	PARP1i to distal	Ctrl	Ctrl D3 Lyso PARP1i to distal.tif Lyso.csv	1.02021	1.5362	0.46837	0.95713	0.62305	173.953	1	119.434	100	2295	51.1	33.3062	153.435	0.68438	0.65096	0.85714
	Lysotracker	Distal	PARP1i to distal	Ctrl	Ctrl D3 Lyso PARP1i to distal.tif Lyso.csv	2.46755	1.09421	2.86226	1.99691	1.82499	67.8871	0.79117	729.875	100	14025	82.125	33.3062	123.69	1.825	0.91391	0.86614
	Lysotracker	Distal	PARP1i to distal	Ctrl	Ctrl D3 Lyso PARP1i to distal.tif Lyso.csv	1.02021	1.23565	0.52041	0.90485	0.73229	0	1	132.705	100	2550	49.0469	33.5344	153.435	0.68438	0.80929	0.90909
	Lysotracker	Distal	PARP1i to distal	Ctrl	Ctrl D3 Lyso PARP1i to distal.tif Lyso.csv	1.88117	1.12368	1.82144	1.6143	1.43662	109.683	0.8971	464.466	100	8925	63.6469	33.7625	104.036	1.36875	0.88993	0.8642
	Lysotracker	Distal	PARP1i to distal	Ctrl	Ctrl D3 Lyso PARP1i to distal.tif Lyso.csv	1.61309	1.19812	1.09286	1.29118	1.07767	124.315	0.80177	278.68	100	5355	85.0906	33.9906	135	1.29047	0.83464	0.76364
	Lysotracker	Distal	PARP1i to distal	Ctrl	Ctrl D3 Lyso PARP1i to distal.tif Lyso.csv	0.64524	1.46385	0.15612	0.53943	0.3685	45	1	39.8114	100	765	18.9344	34.675	45	0.45625	0.68313	0.85714
	Lysotracker	Distal	PARP1i to distal	Ctrl	Ctrl D3 Lyso PARP1i to distal.tif Lyso.csv	1.61309	1.05959	1.30103	1.32485	1.25034	52.5342	0.87295	331.762	100	6375	58.6281	35.1313	171.87	1.36875	0.94376	0.79365
	Lysotracker	Distal	PARP1i to distal	Ctrl	Ctrl D3 Lyso PARP1i to distal.tif Lyso.csv	0.82252	1.55299	0.26021	0.71729	0.46188	161.565	1	66.3523	100	1275	68.6656	34.9031	146.31	0.45625	0.64392	0.90909
	Lysotracker	Distal	PARP1i to distal	Ctrl	Ctrl D3 Lyso PARP1i to distal.tif Lyso.csv	2.15213	1.3046	2.28981	1.95026	1.49491	177.678	0.88676	583.9	100	11220	0	36.0438	147.995	1.59688	0.76652	0.88
	Lysotracker	Distal	PARP1i to distal	Ctrl	Ctrl D3 Lyso PARP1i to distal.tif Lyso.csv	1.29047	1.23857	0.72857	1.0719	0.86543	35.5148	1	185.786	100	3570	94.2156	86.4594	45	0.9125	0.80738	0.93333
	Lysotracker	Distal	PARP1i to distal	Ctrl	Ctrl D3 Lyso PARP1i to distal.tif Lyso.csv	1.66078	1.5905	1.1449	1.52267	0.95735	2.5697	0.92226	291.95	100	5610	69.35	88.2844	164.055	0.9125	0.62873	0.88
	Lysotracker	Distal	PARP1i to distal	Ctrl	Ctrl D3 Lyso PARP1i to distal.tif Lyso.csv	1.33019	1.26316	0.8847	1.19284	0.94433	15.1716	1	225.598	100	4335	84.4063	89.1969	30.9638	0.9125	0.79166	0.91892
	Lysotracker	Distal	PARP1i to distal	Ctrl	Ctrl D3 Lyso PARP1i to distal.tif Lyso.csv	1.88117	1.19522	1.87348	1.68851	1.41272	22.3537	0.90283	477.737	100	9180	89.8813	89.1969	14.0362	1.58756	0.83667	0.83721
	Lysotracker	Distal	PARP1i to distal	Ctrl	Ctrl D3 Lyso PARP1i to distal.tif Lyso.csv	1.14063	1.81718	0.46837	1.041	0.57286	26.565	1	119.434	100	2295	64.1031	89.425	36.8699	0.68438	0.5503	0.85714
	Lysotracker	Distal	PARP1i to distal	Ctrl	Ctrl D3 Lyso PARP1i to distal.tif Lyso.csv	0.64524	1	0.20816	0.51482	0.51482	0	1	53.0819	100	1020	88.5125	88.7406	135	0.45625	1	1
	Lysotracker	Distal	PARP1i to distal	Ctrl	Ctrl D3 Lyso PARP1i to distal.tif Lyso.csv	1.78171	1.11602	1.7694	1.58563	1.4208	22.443	0.99444	451.196	100	8670	60.6813	90.1094	39.8056	1.36875	0.89604	0.90667
	Lysotracker	Distal	PARP1i to distal	Ctrl	Ctrl D3 Lyso PARP1i to distal.tif Lyso.csv	1.14063	1.15921	0.67653	0.99926	0.86202	135	1	172.516	100	3315	93.7594	88.9688	126.87	0.9125	0.86266	0.89655
	Lysotracker	Distal	PARP1i to distal	Ctrl	Ctrl D3 Lyso PARP1i to distal.tif Lyso.csv	0.96785	1.22859	0.41633	0.80701	0.65686	45.0002	1	106.164	100	2040	47.45	91.0219	45	0.68438	0.81394	0.94118
	Lysotracker	Distal	PARP1i to distal	Ctrl	Ctrl D3 Lyso PARP1i to distal.tif Lyso.csv	1.53031	1.37725	1.1449	1.41692	1.02881	10.0498	0.92226	291.95	100	5610	62.05	90.5656	153.435	1.14063	0.72609	0.86275
	Lysotracker	Distal	PARP1i to distal	Ctrl	Ctrl D3 Lyso PARP1i to distal.tif Lyso.csv	1.16321	1.46855	0.57245	1.03459	0.7045	0	0.97622	145.975	100	2805	68.6656	90.5656	168.69	0.68438	0.68095	0.84615
	Lysotracker	Distal	PARP1i to distal	Ctrl	Ctrl D3 Lyso PARP1i to distal.tif Lyso.csv	1.02021	1.23565	0.52041	0.90485	0.73229	0	1	132.705	100	2550	97.1813	90.5656	153.435	0.68438	0.80929	0.90909
	Lysotracker	Distal	PARP1i to distal	Ctrl	Ctrl D3 Lyso PARP1i to distal.tif Lyso.csv	1.66078	1.8173	1.1449	1.62762	0.89563	101.338	0.78823	291.95	100	5610	99.6906	90.3375	105.945	0.99637	0.55027	0.78571
	Lysotracker	Distal	PARP1i to distal	Ctrl	Ctrl D3 Lyso PARP1i to distal.tif Lyso.csv	2.28125	1.19602	2.75817	2.04944	1.71355	50.463	0.9156	703.335	100	13515	18.9344	92.6188	36.8699	1.825	0.83611	0.88333
	Lysotracker	Distal	PARP1i to distal	Ctrl	Ctrl D3 Lyso PARP1i to distal.tif Lyso.csv	1.46071	1.06179	1.09286	1.21551	1.14477	20.3007	1	278.68	100	5355	90.5656	92.1625	38.6598	1.14063	0.9418	0.91304
	Lysotracker	Distal	PARP1i to distal	Ctrl	Ctrl D3 Lyso PARP1i to distal.tif Lyso.csv	0.64524	1	0.20816	0.51482	0.51482	0	1	53.0819	100	1020	12.0906	91.4781	135	0.45625	1	1
	Lysotracker	Distal	PARP1i to distal	Ctrl	Ctrl D4 Lyso PARP1i to distal.tif Lyso.csv	2.97439	1.54027	4.0592	2.82146	1.8318	16.4333	0.75456	1035.1	100	19890	106.534	28.7437	32.4712	2.05313	0.64924	0.88636
	Lysotracker	Distal	PARP1i to distal	Ctrl	Ctrl D4 Lyso PARP1i to distal.tif Lyso.csv	1.02021	1.13876	0.57245	0.91105	0.80003	18.435	1	145.975	100	2805	83.4938	27.375	153.435	0.9125	0.87814	0.81481
	Lysotracker	Distal	PARP1i to distal	Ctrl	Ctrl D4 Lyso PARP1i to distal.tif Lyso.csv	2.46755	1.23046	2.96634	2.15575	1.75199	165.457	0.80664	756.416	100	14535	52.4688	27.6031	146.31	1.825	0.81271	0.86364
	Lysotracker	Distal	PARP1i to distal	Ctrl	Ctrl D4 Lyso PARP1i to distal.tif Lyso.csv	1.02021	1.26032	0.41633	0.81736	0.64853	46.193	0.7854	106.164	100	2040	5.475	28.9719	26.565	0.80654	0.79345	0.69565
	Lysotracker	Distal	PARP1i to distal	Ctrl	Ctrl D4 Lyso PARP1i to distal.tif Lyso.csv	1.66078	1.34882	1.40511	1.55341	1.15168	166.952	1	358.303	100	6885	8.66875	28.7437	164.055	1.14063	0.74139	0.88525
	Lysotracker	Distal	PARP1i to distal	Ctrl	Ctrl D4 Lyso PARP1i to distal.tif Lyso.csv	0.72139	1.4676	0.20816	0.62368	0.42497	0	1	53.0819	100	1020	17.1094	28.5156	161.565	0.45625	0.68139	0.8
	Lysotracker	Distal	PARP1i to distal	Ctrl	Ctrl D4 Lyso PARP1i to distal.tif Lyso.csv	3.32155	1.6568	3.85104	2.85022	1.72032	152.448	0.73972	982.014	100	18870	28.2875	29.4281	164.055	2.00926	0.60357	0.82682
	Lysotracker	Distal	PARP1i to distal	Ctrl	Ctrl D4 Lyso PARP1i to distal.tif Lyso.csv	1.73735	1.23758	1.56123	1.56847	1.26736	12.4922	1	398.114	100	7650	54.75	29.8844	23.1986	1.36875	0.80803	0.86957
	Lysotracker	Distal	PARP1i to distal	Ctrl	Ctrl D4 Lyso PARP1i to distal.tif Lyso.csv	2.10321	1.37102	1.71735	1.73144	1.26288	172.763	0.65233	437.925	100	8415	108.359	30.1125	167.471	1.36875	0.72939	0.77647
	Lysotracker	Distal	PARP1i to distal	Ctrl	Ctrl D4 Lyso PARP1i to distal.tif Lyso.csv	2.04041	1.52878	1.61327	1.77207	1.15914	41.9888	0.81978	411.384	100	7905	18.7063	31.025	26.565	1.29047	0.65412	0.79487
	Lysotracker	Distal	PARP1i to distal	Ctrl	Ctrl D4 Lyso PARP1i to distal.tif Lyso.csv	0.82252	1.55299	0.26021	0.71729	0.46188	161.565	1	66.3523	100	1275	31.9375	30.5688	146.31	0.45625	0.64392	0.90909
	Lysotracker	Distal	PARP1i to distal	Ctrl	Ctrl D4 Lyso PARP1i to distal.tif Lyso.csv	1.02021	1.34027	0.46837	0.89402	0.66704	159.699	1	119.434	100	2295	79.1594	31.025	153.435	0.68438	0.74612	0.85714
	Lysotracker	Distal	PARP1i to distal	Ctrl	Ctrl D4 Lyso PARP1i to distal.tif Lyso.csv	3.26625	2.33028	3.53879	3.24031	1.39052	1.35233	0.56557	902.391	100	17340	110.184	32.1656	12.0948	1.59688	0.42913	0.80473
	Lysotracker	Distal	PARP1i to distal	Ctrl	Ctrl D4 Lyso PARP1i to distal.tif Lyso.csv	2.3817	1.99846	1.66531	2.0585	1.03004	3.02994	0.67627	424.655	100	8160	65.7	32.1656	16.6992	1.14063	0.50038	0.79012
	Lysotracker	Distal	PARP1i to distal	Ctrl	Ctrl D4 Lyso PARP1i to distal.tif Lyso.csv	1.33019	1.26316	0.8847	1.19284	0.94433	164.828	1	225.598	100	4335	52.6969	31.4812	149.036	0.9125	0.79166	0.91892
	Lysotracker	Distal	PARP1i to distal	Ctrl	Ctrl D4 Lyso PARP1i to distal.tif Lyso.csv	1.14063	1.13493	0.62449	0.94995	0.83702	160.195	1	159.246	100	3060	115.431	31.7094	143.13	0.9125	0.88111	0.85714
	Lysotracker	Distal	PARP1i to distal	Ctrl	Ctrl D4 Lyso PARP1i to distal.tif Lyso.csv	1.66078	1.22056	1.30103	1.42193	1.16498	59.2533	0.87295	331.762	100	6375	13.9156	34.2188	74.0546	1.29047	0.81929	0.81967
	Lysotracker	Distal	PARP1i to distal	Ctrl	Ctrl D4 Lyso PARP1i to distal.tif Lyso.csv	1.33019	1.66226	0.72857	1.24177	0.74704	172.839	1	185.786	100	3570	47.9063	32.85	149.036	0.68438	0.60159	0.96552
	Lysotracker	Distal	PARP1i to distal	Ctrl	Ctrl D4 Lyso PARP1i to distal.tif Lyso.csv	0.82252	1.5	0.31225	0.77223	0.51482	90	1	79.6228	100	1530	49.275	84.6344	123.69	0.45625	0.66667	1
	Lysotracker	Distal	PARP1i to distal	Ctrl	Ctrl D4 Lyso PARP1i to distal.tif Lyso.csv	0.94058	1.80907	0.31225	0.84807	0.46879	0	0.91631	79.6228	100	1530	34.2188	85.0906	165.964	0.45625	0.55277	0.85714
	Lysotracker	Distal	PARP1i to distal	Ctrl	Ctrl D4 Lyso PARP1i to distal.tif Lyso.csv	1.8392	1.38564	1.56123	1.65964	1.19774	25.7936	0.92922	398.114	100	7650	67.2969	86.6875	29.7449	1.36875	0.72169	0.86957
	Lysotracker	Distal	PARP1i to distal	Ctrl	Ctrl D4 Lyso PARP1i to distal.tif Lyso.csv	0.82252	2.03127	0.20816	0.73374	0.36122	121.717	0.85737	53.0819	100	1020	70.7188	86.0031	123.69	0.45625	0.4923	0.8
	Lysotracker	Distal	PARP1i to distal	Ctrl	Ctrl D4 Lyso PARP1i to distal.tif Lyso.csv	1.33019	1.12958	0.93674	1.16071	1.02756	115.406	1	238.868	100	4590	4.33438	86.2313	120.964	1.12916	0.88529	0.85714
	Lysotracker	Distal	PARP1i to distal	Ctrl	Ctrl D4 Lyso PARP1i to distal.tif Lyso.csv	2.3817	1.13994	2.65409	1.9627	1.72176	176.56	0.82932	676.794	100	13005	110.184	87.1438	163.301	1.825	0.87724	0.84298
	Lysotracker	Distal	PARP1i to distal	Ctrl	Ctrl D4 Lyso PARP1i to distal.tif Lyso.csv	0.96785	1.37971	0.36429	0.79997	0.57981	149.527	1	92.8932	100	1785	48.3625	86.9156	135	0.68438	0.72479	0.875
	Lysotracker	Distal	PARP1i to distal	Ctrl	Ctrl D4 Lyso PARP1i to distal.tif Lyso.csv	0.96785	1.22859	0.41633	0.80701	0.65686	45.0002	1	106.164	100	2040	62.05	87.6	45	0.68438	0.81394	0.94118
	Lysotracker	Distal	PARP1i to distal	Ctrl	Ctrl D4 Lyso PARP1i to distal.tif Lyso.csv	0.96785	1	0.46837	0.77223	0.77223	0	1	119.434	100	2295	5.70313	87.3719	135	0.68438	1	1
	Lysotracker	Distal	PARP1i to distal	Ctrl	Ctrl D4 Lyso PARP1i to distal.tif Lyso.csv	0.82252	1.29099	0.31225	0.71642	0.55493	135	1	79.6228	100	1530	108.816	88.7406	123.69	0.64524	0.7746	0.8
	Lysotracker	Distal	PARP1i to distal	Ctrl	Ctrl D4 Lyso PARP1i to distal.tif Lyso.csv	0.82252	1.06885	0.36429	0.7041	0.65875	0	1	92.8932	100	1785	23.4969	89.1969	123.69	0.68438	0.93559	0.875
	Lysotracker	Distal	PARP1i to distal	Ctrl	Ctrl D5 Lyso PARP1i to distal.tif Lyso.csv	1.53031	1.66469	1.04082	1.48529	0.89223	174.283	0.9248	265.409	100	5100	112.009	28.9719	153.435	0.9125	0.60071	0.90909
	Lysotracker	Distal	PARP1i to distal	Ctrl	Ctrl D5 Lyso PARP1i to distal.tif Lyso.csv	2.8584	2.18651	2.49797	2.63708	1.20607	160.631	0.79434	636.982	100	12240	111.781	30.1125	151.39	1.36875	0.45735	0.88889
	Lysotracker	Distal	PARP1i to distal	Ctrl	Ctrl D5 Lyso PARP1i to distal.tif Lyso.csv	1.29047	1.20522	0.78062	1.09448	0.90811	73.9973	0.869	199.057	100	3825	73.4563	31.4812	45	1.0825	0.82972	0.76923
	Lysotracker	Distal	PARP1i to distal	Ctrl	Ctrl D5 Lyso PARP1i to distal.tif Lyso.csv	1.14063	1.37205	0.57245	1.00002	0.72885	15.0707	1	145.975	100	2805	86.4594	31.7094	36.8699	0.68438	0.72883	0.95652
	Lysotracker	Distal	PARP1i to distal	Ctrl	Ctrl D5 Lyso PARP1i to distal.tif Lyso.csv	0.94058	1.38707	0.36429	0.8021	0.57827	10.9007	0.8976	92.8932	100	1785	114.063	31.9375	165.964	0.68438	0.72094	0.73684
	Lysotracker	Distal	PARP1i to distal	Ctrl	Ctrl D5 Lyso PARP1i to distal.tif Lyso.csv	2.45698	1.99009	2.28981	2.40874	1.21037	8.72034	0.80906	583.9	100	11220	47.6781	33.0781	21.8014	1.3436	0.50249	0.86275
	Lysotracker	Distal	PARP1i to distal	Ctrl	Ctrl D5 Lyso PARP1i to distal.tif Lyso.csv	1.02021	1.23565	0.52041	0.90485	0.73229	0	1	132.705	100	2550	59.9969	32.3937	153.435	0.68438	0.80929	0.90909
	Lysotracker	Distal	PARP1i to distal	Ctrl	Ctrl D5 Lyso PARP1i to distal.tif Lyso.csv	0.72139	1.4676	0.20816	0.62368	0.42497	90	0.85737	53.0819	100	1020	66.3844	32.6219	108.435	0.45625	0.68139	0.8
	Lysotracker	Distal	PARP1i to distal	Ctrl	Ctrl D5 Lyso PARP1i to distal.tif Lyso.csv	1.22849	1.12747	0.78062	1.05859	0.9389	14.0362	1	199.057	100	3825	79.6156	33.9906	21.8014	0.9125	0.88694	0.85714
	Lysotracker	Distal	PARP1i to distal	Ctrl	Ctrl D5 Lyso PARP1i to distal.tif Lyso.csv	3.26625	2.21483	3.69491	3.22796	1.45743	176.882	0.69619	942.203	100	18105	67.525	34.2188	167.905	1.59688	0.4515	0.85542
	Lysotracker	Distal	PARP1i to distal	Ctrl	Ctrl D5 Lyso PARP1i to distal.tif Lyso.csv	0.64524	1	0.20816	0.51482	0.51482	0	1	53.0819	100	1020	110.869	33.7625	135	0.45625	1	1
	Lysotracker	Distal	PARP1i to distal	Ctrl	Ctrl D5 Lyso PARP1i to distal.tif Lyso.csv	0.82252	1.06885	0.36429	0.7041	0.65875	90	1	92.8932	100	1785	65.7	33.9906	123.69	0.68438	0.93559	0.875
	Lysotracker	Distal	PARP1i to distal	Ctrl	Ctrl D5 Lyso PARP1i to distal.tif Lyso.csv	0.82252	1.1239	0.31225	0.66845	0.59476	153.435	0.91631	79.6228	100	1530	72.7719	34.9031	123.69	0.68438	0.88976	0.8
	Lysotracker	Distal	PARP1i to distal	Ctrl	Ctrl D5 Lyso PARP1i to distal.tif Lyso.csv	0.64524	1	0.20816	0.51482	0.51482	0	1	53.0819	100	1020	36.7281	86.6875	135	0.45625	1	1
	Lysotracker	Distal	PARP1i to distal	Ctrl	Ctrl D5 Lyso PARP1i to distal.tif Lyso.csv	1.33019	1.08287	1.04082	1.19793	1.10626	63.435	1	265.409	100	5100	89.425	86.6875	120.964	1.14063	0.92347	0.88889
	Lysotracker	Distal	PARP1i to distal	Ctrl	Ctrl D5 Lyso PARP1i to distal.tif Lyso.csv	0.82252	1.55299	0.26021	0.71729	0.46188	18.435	1	66.3523	100	1275	10.7219	87.3719	33.6901	0.45625	0.64392	0.90909
	Lysotracker	Distal	PARP1i to distal	Ctrl	Ctrl D5 Lyso PARP1i to distal.tif Lyso.csv	1.88117	1.40482	1.71735	1.75265	1.2476	172.035	0.89243	437.925	100	8415	22.3562	88.0563	165.964	1.36875	0.71184	0.84615
	Lysotracker	Distal	PARP1i to distal	Ctrl	Ctrl D5 Lyso PARP1i to distal.tif Lyso.csv	1.38763	1.49864	0.78062	1.22046	0.81438	3.32721	0.869	199.057	100	3825	61.5938	87.8281	170.538	0.9125	0.66727	0.81081
	Lysotracker	Distal	PARP1i to distal	Ctrl	Ctrl D5 Lyso PARP1i to distal.tif Lyso.csv	1.14063	1.37205	0.57245	1.00002	0.72885	105.071	1	145.975	100	2805	1.14063	87.6	126.87	0.68438	0.72883	0.95652
	Lysotracker	Distal	PARP1i to distal	Ctrl	Ctrl D5 Lyso PARP1i to distal.tif Lyso.csv	0.72139	1	0.26021	0.57559	0.57559	0	0.87266	66.3523	100	1275	93.3031	87.6	108.435	0.64524	1	0.71429
	Lysotracker	Distal	PARP1i to distal	Ctrl	Ctrl D5 Lyso PARP1i to distal.tif Lyso.csv	0.96785	1.22859	0.41633	0.80701	0.65686	45.0002	1	106.164	100	2040	84.1781	88.7406	45	0.68438	0.81394	0.94118
	Lysotracker	Distal	PARP1i to distal	Ctrl	Ctrl D5 Lyso PARP1i to distal.tif Lyso.csv	0.82252	1.55299	0.26021	0.71729	0.46188	161.565	1	66.3523	100	1275	91.4781	88.5125	146.31	0.45625	0.64392	0.90909
	Lysotracker	Distal	PARP1i to distal	Ctrl	Ctrl D5 Lyso PARP1i to distal.tif Lyso.csv	1.14063	1.13493	0.62449	0.94995	0.83702	160.195	1	159.246	100	3060	108.816	88.9688	143.13	0.9125	0.88111	0.85714
	Lysotracker	Distal	PARP1i to distal	Ctrl	Ctrl D5 Lyso PARP1i to distal.tif Lyso.csv	2.04041	1.57948	1.71735	1.85841	1.1766	171.5	0.84583	437.925	100	8415	18.4781	89.1969	153.435	1.36875	0.63312	0.84615
	Lysotracker	Distal	PARP1i to distal	Ctrl	Ctrl D5 Lyso PARP1i to distal.tif Lyso.csv	3.04357	1.3793	3.64287	2.52934	1.83378	152.865	0.64708	928.932	100	17850	75.2813	91.25	167.005	2.11319	0.725	0.78212
	Lysotracker	Distal	PARP1i to distal	Ctrl	Ctrl D5 Lyso PARP1i to distal.tif Lyso.csv	1.66078	1.26633	1.35307	1.47703	1.16638	92.5433	0.93155	345.032	100	6630	114.747	90.1094	105.945	1.14063	0.78968	0.88136
	Lysotracker	Distal	PARP1i to distal	Ctrl	Ctrl D5 Lyso PARP1i to distal.tif Lyso.csv	0.64524	1.46385	0.15612	0.53943	0.3685	135	1	39.8114	100	765	9.35313	92.1625	135	0.45625	0.68313	0.85714
	Lysotracker	Proximal	Mock	Ctrl	Ctrl P1 Lyso Mock.tif Lyso.csv	1.02021	1.41576	0.41633	0.8663	0.6119	172.982	0.91441	106.164	100	2040	26.9187	24.6375	153.435	0.68438	0.70633	0.8
	Lysotracker	Proximal	Mock	Ctrl	Ctrl P1 Lyso Mock.tif Lyso.csv	0.94058	1.38707	0.36429	0.8021	0.57827	169.099	0.8976	92.8932	100	1785	57.2594	25.55	165.964	0.68438	0.72094	0.73684
	Lysotracker	Proximal	Mock	Ctrl	Ctrl P1 Lyso Mock.tif Lyso.csv	1.33019	1.24825	0.93674	1.22016	0.97749	0	1	238.868	100	4590	26.0063	25.7781	149.036	0.9125	0.80112	0.94737
	Lysotracker	Proximal	Mock	Ctrl	Ctrl P1 Lyso Mock.tif Lyso.csv	1.02021	1.41576	0.41633	0.8663	0.6119	172.982	1	106.164	100	2040	97.8656	25.7781	153.435	0.68438	0.70633	0.8
	Lysotracker	Proximal	Mock	Ctrl	Ctrl P1 Lyso Mock.tif Lyso.csv	4.38807	1.90328	7.02554	4.12617	2.16792	176.355	0.77224	1791.51	100	34425	92.1625	28.2875	8.97263	2.28125	0.52541	0.89109
	Lysotracker	Proximal	Mock	Ctrl	Ctrl P1 Lyso Mock.tif Lyso.csv	0.96785	1	0.46837	0.77223	0.77223	0	1	119.434	100	2295	9.80938	27.6031	135	0.68438	1	1
	Lysotracker	Proximal	Mock	Ctrl	Ctrl P1 Lyso Mock.tif Lyso.csv	1.33019	1.22037	0.93674	1.20645	0.9886	31.5861	1	238.868	100	4590	14.1438	28.5156	30.9638	1.12257	0.81943	0.85714
	Lysotracker	Proximal	Mock	Ctrl	Ctrl P1 Lyso Mock.tif Lyso.csv	4.48195	1.87807	7.28574	4.17396	2.22247	173.508	0.66706	1857.86	100	35700	71.4031	28.0594	165.256	2.5068	0.53246	0.84337
	Lysotracker	Proximal	Mock	Ctrl	Ctrl P1 Lyso Mock.tif Lyso.csv	1.14063	1.13493	0.62449	0.94995	0.83702	19.8053	1	159.246	100	3060	78.0188	28.2875	36.8699	0.9125	0.88111	0.85714
	Lysotracker	Proximal	Mock	Ctrl	Ctrl P1 Lyso Mock.tif Lyso.csv	1.22849	1.18561	0.78062	1.08554	0.91559	5.88414	0.97567	199.057	100	3825	20.3031	28.2875	158.199	0.9125	0.84344	0.88235
	Lysotracker	Proximal	Mock	Ctrl	Ctrl P1 Lyso Mock.tif Lyso.csv	0.64524	1	0.20816	0.51482	0.51482	0	1	53.0819	100	1020	17.7937	28.0594	135	0.45625	1	1
	Lysotracker	Proximal	Mock	Ctrl	Ctrl P1 Lyso Mock.tif Lyso.csv	1.22849	1.86648	0.52041	1.11209	0.59582	173.158	0.88747	132.705	100	2550	33.5344	28.5156	158.199	0.68438	0.53577	0.8
	Lysotracker	Proximal	Mock	Ctrl	Ctrl P1 Lyso Mock.tif Lyso.csv	0.96785	1.22859	0.41633	0.80701	0.65686	45.0002	1	106.164	100	2040	35.3594	29.6562	45	0.68438	0.81394	0.94118
	Lysotracker	Proximal	Mock	Ctrl	Ctrl P1 Lyso Mock.tif Lyso.csv	1.33019	1.4352	0.78062	1.19435	0.83218	117.549	1	199.057	100	3825	54.9781	29.8844	120.964	0.9125	0.69677	0.88235
	Lysotracker	Proximal	Mock	Ctrl	Ctrl P1 Lyso Mock.tif Lyso.csv	3.00052	1.57477	3.22654	2.5435	1.61516	174.439	0.62833	822.769	100	15810	69.5781	31.2531	8.74616	1.825	0.63502	0.78481
	Lysotracker	Proximal	Mock	Ctrl	Ctrl P1 Lyso Mock.tif Lyso.csv	0.82252	1.1239	0.31225	0.66845	0.59476	26.565	0.91631	79.6228	100	1530	73.6844	31.7094	146.31	0.68438	0.88976	0.8
	Lysotracker	Proximal	Mock	Ctrl	Ctrl P1 Lyso Mock.tif Lyso.csv	1.33019	1.52983	0.78062	1.23309	0.80603	15.0136	0.97567	199.057	100	3825	93.9875	32.3937	30.9638	0.9125	0.65367	0.85714
	Lysotracker	Proximal	Mock	Ctrl	Ctrl P1 Lyso Mock.tif Lyso.csv	1.44279	1.69095	0.78062	1.2964	0.76667	2.22369	0.7234	199.057	100	3825	66.3844	82.5813	161.565	0.9125	0.59139	0.75
	Lysotracker	Proximal	Mock	Ctrl	Ctrl P1 Lyso Mock.tif Lyso.csv	0.82252	1.29099	0.31225	0.71642	0.55493	135	1	79.6228	100	1530	60.6813	82.5813	123.69	0.64524	0.7746	0.8
	Lysotracker	Proximal	Mock	Ctrl	Ctrl P1 Lyso Mock.tif Lyso.csv	0.64524	1.46385	0.15612	0.53943	0.3685	45	1	39.8114	100	765	28.2875	83.2656	45	0.45625	0.68313	0.85714
	Lysotracker	Proximal	Mock	Ctrl	Ctrl P1 Lyso Mock.tif Lyso.csv	1.96241	1.10513	2.13368	1.73271	1.56788	173.431	0.86648	544.089	100	10455	78.475	82.8094	125.538	1.59688	0.90487	0.86316
	Lysotracker	Proximal	Mock	Ctrl	Ctrl P1 Lyso Mock.tif Lyso.csv	0.94058	1.38707	0.36429	0.8021	0.57827	169.099	0.8976	92.8932	100	1785	56.8031	83.2656	165.964	0.68438	0.72094	0.73684
	Lysotracker	Proximal	Mock	Ctrl	Ctrl P1 Lyso Mock.tif Lyso.csv	1.02021	1.13855	0.46837	0.824	0.72372	90	0.72553	119.434	100	2295	75.7375	83.0375	116.565	0.68438	0.87831	0.81818
	Lysotracker	Proximal	Mock	Ctrl	Ctrl P1 Lyso Mock.tif Lyso.csv	1.22849	1.95689	0.57245	1.19428	0.6103	0	0.97622	145.975	100	2805	53.1531	83.7219	158.199	0.68438	0.51102	0.84615
	Lysotracker	Proximal	Mock	Ctrl	Ctrl P1 Lyso Mock.tif Lyso.csv	1.02021	1.42525	0.36429	0.81306	0.57047	173.953	0.62123	92.8932	100	1785	67.0688	83.4938	153.435	0.68438	0.70163	0.7
	Lysotracker	Proximal	Mock	Ctrl	Ctrl P1 Lyso Mock.tif Lyso.csv	1.44279	1.55293	0.8847	1.3226	0.85168	166.036	0.91096	225.598	100	4335	92.3906	83.95	161.565	0.9125	0.64394	0.85
	Lysotracker	Proximal	Mock	Ctrl	Ctrl P1 Lyso Mock.tif Lyso.csv	1.02021	1.34027	0.46837	0.89402	0.66704	20.3007	1	119.434	100	2295	88.7406	84.6344	26.565	0.68438	0.74612	0.85714
	Lysotracker	Proximal	Mock	Ctrl	Ctrl P1 Lyso Mock.tif Lyso.csv	0.64524	1.46385	0.15612	0.53943	0.3685	135	1	39.8114	100	765	99.6906	84.1781	135	0.45625	0.68313	0.85714
	Lysotracker	Proximal	Mock	Ctrl	Ctrl P1 Lyso Mock.tif Lyso.csv	1.14063	1.01986	0.72857	0.97266	0.95372	2.771e-13	1	185.786	100	3570	25.7781	84.6344	126.87	0.9125	0.98052	0.93333
	Lysotracker	Proximal	Mock	Ctrl	Ctrl P1 Lyso Mock.tif Lyso.csv	0.64524	1.46385	0.15612	0.53943	0.3685	135	1	39.8114	100	765	25.0938	86.2313	135	0.45625	0.68313	0.85714
	Lysotracker	Proximal	Mock	Ctrl	Ctrl P1 Lyso Mock.tif Lyso.csv	1.22849	1.14801	0.52041	0.87217	0.75972	114.12	0.51927	132.705	100	2550	32.6219	86.9156	158.199	1.07706	0.87107	0.55556
	Lysotracker	Proximal	Mock	Ctrl	Ctrl P1 Lyso Mock.tif Lyso.csv	1.02021	1	0.62449	0.8917	0.8917	0	1	159.246	100	3060	54.2938	86.6875	116.565	0.9125	1	0.85714
	Lysotracker	Proximal	Mock	Ctrl	Ctrl P1 Lyso Mock.tif Lyso.csv	1.64503	1.3953	1.24898	1.48959	1.06758	27.9487	1	318.491	100	6120	92.8469	87.6	33.6901	1.14063	0.71669	0.90566
	Lysotracker	Proximal	Mock	Ctrl	Ctrl P1 Lyso Mock.tif Lyso.csv	1.53031	1.23546	1.19694	1.37217	1.11065	9.55649	1	305.221	100	5865	47.2219	87.8281	26.565	1.14063	0.80941	0.88462
	Lysotracker	Proximal	Mock	Ctrl	Ctrl P1 Lyso Mock.tif Lyso.csv	1.33019	1.26021	0.72857	1.08122	0.85797	50.0623	0.91063	185.786	100	3570	64.7875	88.0563	30.9638	0.9125	0.79352	0.82353
	Lysotracker	Proximal	Mock	Ctrl	Ctrl P1 Lyso Mock.tif Lyso.csv	0.64524	1.46385	0.15612	0.53943	0.3685	135	1	39.8114	100	765	80.7563	87.3719	135	0.45625	0.68313	0.85714
	Lysotracker	Proximal	Mock	Ctrl	Ctrl P1 Lyso Mock.tif Lyso.csv	1.22849	1.57861	0.62449	1.12036	0.70971	170.583	1	159.246	100	3060	95.5844	87.3719	158.199	0.68438	0.63347	0.88889
	Lysotracker	Proximal	Mock	Ctrl	Ctrl P1 Lyso Mock.tif Lyso.csv	0.64524	1	0.20816	0.51482	0.51482	0	1	53.0819	100	1020	112.694	87.3719	135	0.45625	1	1
	Lysotracker	Proximal	Mock	Ctrl	Ctrl P1 Lyso Mock.tif Lyso.csv	1.88117	2.64417	0.93674	1.77586	0.67161	177.715	0.64492	238.868	100	4590	69.1219	88.2844	14.0362	0.68438	0.37819	0.83721
	Lysotracker	Proximal	Mock	Ctrl	Ctrl P1 Lyso Mock.tif Lyso.csv	0.64524	1.46385	0.15612	0.53943	0.3685	135	1	39.8114	100	765	107.903	88.0563	135	0.45625	0.68313	0.85714
	Lysotracker	Proximal	Mock	Ctrl	Ctrl P1 Lyso Mock.tif Lyso.csv	0.64524	1.46385	0.15612	0.53943	0.3685	45	1	39.8114	100	765	114.519	89.1969	45	0.45625	0.68313	0.85714
	Lysotracker	Proximal	Mock	Ctrl	Ctrl P1 Lyso Mock.tif Lyso.csv	1.38763	1.43331	0.78062	1.19356	0.83273	3.33994	0.869	199.057	100	3825	39.0094	90.5656	170.538	0.9125	0.69769	0.76923
	Lysotracker	Proximal	Mock	Ctrl	Ctrl P2 Lyso Mock.tif Lyso.csv	1.53031	1.79776	0.72857	1.29139	0.71833	12.5288	0.72698	185.786	100	3570	65.9281	17.5656	26.565	0.9125	0.55625	0.71795
	Lysotracker	Proximal	Mock	Ctrl	Ctrl P2 Lyso Mock.tif Lyso.csv	1.14063	1.01986	0.72857	0.97266	0.95372	90	1	185.786	100	3570	13.2312	23.725	126.87	0.9125	0.98052	0.93333
	Lysotracker	Proximal	Mock	Ctrl	Ctrl P2 Lyso Mock.tif Lyso.csv	1.53031	1.3699	1.24898	1.47597	1.07743	180	1	318.491	100	6120	41.7469	24.1812	153.435	1.14063	0.72998	0.88889
	Lysotracker	Proximal	Mock	Ctrl	Ctrl P2 Lyso Mock.tif Lyso.csv	2.04041	1.34827	1.92552	1.8181	1.34847	47.0798	0.82091	491.007	100	9435	48.3625	25.7781	63.435	1.45178	0.74169	0.84091
	Lysotracker	Proximal	Mock	Ctrl	Ctrl P2 Lyso Mock.tif Lyso.csv	3.39132	2.20003	2.86226	2.83155	1.28705	158.697	0.49264	729.875	100	14025	70.0344	25.0938	160.346	1.73504	0.45454	0.72368
	Lysotracker	Proximal	Mock	Ctrl	Ctrl P2 Lyso Mock.tif Lyso.csv	1.16321	1.25204	0.57245	0.95529	0.76298	169.276	0.63726	145.975	100	2805	63.6469	25.3219	168.69	0.9125	0.7987	0.70968
	Lysotracker	Proximal	Mock	Ctrl	Ctrl P2 Lyso Mock.tif Lyso.csv	2.15213	1.35256	2.23776	1.96309	1.45139	161.231	0.97378	570.63	100	10965	91.25	25.3219	147.995	1.59688	0.73934	0.89583
	Lysotracker	Proximal	Mock	Ctrl	Ctrl P2 Lyso Mock.tif Lyso.csv	2.10321	1.36939	1.61327	1.67715	1.22474	53.9138	0.66837	411.384	100	7905	58.4	26.9187	40.6013	1.37204	0.73025	0.78481
	Lysotracker	Proximal	Mock	Ctrl	Ctrl P2 Lyso Mock.tif Lyso.csv	1.14063	1.37205	0.57245	1.00002	0.72885	15.0707	1	145.975	100	2805	60.4531	26.2344	36.8699	0.68438	0.72883	0.95652
	Lysotracker	Proximal	Mock	Ctrl	Ctrl P2 Lyso Mock.tif Lyso.csv	0.64524	1.46385	0.15612	0.53943	0.3685	135	1	39.8114	100	765	100.603	25.55	135	0.45625	0.68313	0.85714
	Lysotracker	Proximal	Mock	Ctrl	Ctrl P2 Lyso Mock.tif Lyso.csv	0.72139	1.4676	0.20816	0.62368	0.42497	90	0.85737	53.0819	100	1020	108.588	25.7781	108.435	0.45625	0.68139	0.8
	Lysotracker	Proximal	Mock	Ctrl	Ctrl P2 Lyso Mock.tif Lyso.csv	1.02021	2.74897	0.26021	0.95433	0.34716	10.9007	0.67377	66.3523	100	1275	82.8094	26.4625	26.565	0.45625	0.36377	0.76923
	Lysotracker	Proximal	Mock	Ctrl	Ctrl P2 Lyso Mock.tif Lyso.csv	0.82252	1.5	0.31225	0.77223	0.51482	0	1	79.6228	100	1530	107.447	26.2344	146.31	0.45625	0.66667	1
	Lysotracker	Proximal	Mock	Ctrl	Ctrl P2 Lyso Mock.tif Lyso.csv	2.28125	1.36168	2.44593	2.05928	1.5123	40.187	0.92908	623.712	100	11985	52.4688	29.2	36.8699	1.61309	0.73439	0.89524
	Lysotracker	Proximal	Mock	Ctrl	Ctrl P2 Lyso Mock.tif Lyso.csv	2.66037	3.06764	1.56123	2.4694	0.80498	58.9613	0.46001	398.114	100	7650	61.8219	30.5688	59.0362	1.12373	0.32598	0.65934
	Lysotracker	Proximal	Mock	Ctrl	Ctrl P2 Lyso Mock.tif Lyso.csv	2.3817	1.45611	2.70613	2.23989	1.53827	1.16129	0.76569	690.064	100	13260	64.5594	28.7437	163.301	1.59688	0.68676	0.86667
	Lysotracker	Proximal	Mock	Ctrl	Ctrl P2 Lyso Mock.tif Lyso.csv	1.46071	1.27325	0.98878	1.26608	0.99437	77.1795	1	252.139	100	4845	0	29.6562	51.3402	0.9125	0.78539	0.97436
	Lysotracker	Proximal	Mock	Ctrl	Ctrl P2 Lyso Mock.tif Lyso.csv	1.02021	1.34027	0.46837	0.89402	0.66704	159.699	1	119.434	100	2295	32.85	28.5156	153.435	0.68438	0.74612	0.85714
	Lysotracker	Proximal	Mock	Ctrl	Ctrl P2 Lyso Mock.tif Lyso.csv	1.02021	1.41576	0.41633	0.8663	0.6119	7.01812	0.91441	106.164	100	2040	46.3094	28.9719	26.565	0.68438	0.70633	0.8
	Lysotracker	Proximal	Mock	Ctrl	Ctrl P2 Lyso Mock.tif Lyso.csv	1.73735	1.50647	0.93674	1.34043	0.88978	114.857	0.54434	238.868	100	4590	115.431	28.5156	113.199	1.26676	0.6638	0.62069
	Lysotracker	Proximal	Mock	Ctrl	Ctrl P2 Lyso Mock.tif Lyso.csv	1.29047	1.25984	0.62449	1.00087	0.79444	171.65	0.5236	159.246	100	3060	109.728	28.7437	135	0.9125	0.79375	0.68571
	Lysotracker	Proximal	Mock	Ctrl	Ctrl P2 Lyso Mock.tif Lyso.csv	0.82252	1.5	0.31225	0.77223	0.51482	90	1	79.6228	100	1530	23.9531	29.2	123.69	0.45625	0.66667	1
	Lysotracker	Proximal	Mock	Ctrl	Ctrl P2 Lyso Mock.tif Lyso.csv	2.3817	1.31126	3.07042	2.26411	1.72667	2.45721	0.95941	782.957	100	15045	38.7813	29.8844	163.301	1.825	0.76263	0.89394
	Lysotracker	Proximal	Mock	Ctrl	Ctrl P2 Lyso Mock.tif Lyso.csv	0.94058	1.19523	0.41633	0.79597	0.66596	0	1	106.164	100	2040	44.9406	29.6562	165.964	0.68438	0.83666	0.8
	Lysotracker	Proximal	Mock	Ctrl	Ctrl P2 Lyso Mock.tif Lyso.csv	2.51972	1.04216	2.70613	1.89494	1.81829	130.589	0.6048	690.064	100	13260	111.325	30.5688	174.806	2.05313	0.95955	0.72222
	Lysotracker	Proximal	Mock	Ctrl	Ctrl P2 Lyso Mock.tif Lyso.csv	0.82252	1.55299	0.26021	0.71729	0.46188	18.435	1	66.3523	100	1275	105.85	30.1125	33.6901	0.45625	0.64392	0.90909
	Lysotracker	Proximal	Mock	Ctrl	Ctrl P2 Lyso Mock.tif Lyso.csv	1.96241	1.48763	0.98878	1.36852	0.91994	121.8	0.42155	252.139	100	4845	52.925	29.8844	125.538	1.25417	0.67221	0.62295
	Lysotracker	Proximal	Mock	Ctrl	Ctrl P2 Lyso Mock.tif Lyso.csv	2.04041	1.08057	2.13368	1.71335	1.5856	74.8362	0.72667	544.089	100	10455	58.8563	31.7094	63.435	1.7744	0.92543	0.83673
	Lysotracker	Proximal	Mock	Ctrl	Ctrl P2 Lyso Mock.tif Lyso.csv	1.02021	2.23662	0.31225	0.94297	0.42161	167.067	0.80852	79.6228	100	1530	91.25	30.7969	153.435	0.45625	0.4471	0.85714
	Lysotracker	Proximal	Mock	Ctrl	Ctrl P2 Lyso Mock.tif Lyso.csv	1.44279	1.90211	0.78062	1.37496	0.72286	4.22946	0.89835	199.057	100	3825	102.884	30.7969	161.565	0.68438	0.52573	0.90909
	Lysotracker	Proximal	Mock	Ctrl	Ctrl P2 Lyso Mock.tif Lyso.csv	2.15213	1.25541	1.92552	1.75437	1.39745	8.59927	0.74568	491.007	100	9435	54.75	33.9906	32.0054	1.36875	0.79655	0.86047
	Lysotracker	Proximal	Mock	Ctrl	Ctrl P2 Lyso Mock.tif Lyso.csv	3.45216	2.18678	3.53879	3.13895	1.43542	174.441	0.6286	902.391	100	17340	38.325	78.0188	172.405	1.59688	0.45729	0.80952
	Lysotracker	Proximal	Mock	Ctrl	Ctrl P2 Lyso Mock.tif Lyso.csv	3.68547	2.18589	3.33063	3.04461	1.39285	169.243	0.42117	849.31	100	16320	48.3625	78.0188	158.199	1.72649	0.45748	0.69945
	Lysotracker	Proximal	Mock	Ctrl	Ctrl P2 Lyso Mock.tif Lyso.csv	1.53031	1.11881	1.04082	1.21765	1.08834	80.5197	0.69836	265.409	100	5100	4.10625	83.95	116.565	1.29884	0.89381	0.71429
	Lysotracker	Proximal	Mock	Ctrl	Ctrl P2 Lyso Mock.tif Lyso.csv	3.90487	2.72307	4.11124	3.77547	1.38647	175.382	0.64561	1048.37	100	20145	30.1125	84.4063	173.29	1.59688	0.36723	0.85405
	Lysotracker	Proximal	Mock	Ctrl	Ctrl P2 Lyso Mock.tif Lyso.csv	0.82252	1.5	0.31225	0.77223	0.51482	90	1	79.6228	100	1530	57.9438	85.3188	123.69	0.45625	0.66667	1
	Lysotracker	Proximal	Mock	Ctrl	Ctrl P2 Lyso Mock.tif Lyso.csv	0.64524	1.46385	0.15612	0.53943	0.3685	135	1	39.8114	100	765	44.4844	85.775	135	0.45625	0.68313	0.85714
	Lysotracker	Proximal	Mock	Ctrl	Ctrl P2 Lyso Mock.tif Lyso.csv	1.29047	1.13657	0.78062	1.06285	0.93514	45.0006	1	199.057	100	3825	14.8281	87.1438	45	0.9125	0.87984	0.96774
	Lysotracker	Proximal	Mock	Ctrl	Ctrl P2 Lyso Mock.tif Lyso.csv	2.3817	1.19169	3.01838	2.14005	1.79581	169.851	0.90462	769.687	100	14790	79.3875	87.6	16.6992	1.825	0.83915	0.8855
	Lysotracker	Proximal	Mock	Ctrl	Ctrl P2 Lyso Mock.tif Lyso.csv	0.82252	1.06885	0.36429	0.7041	0.65875	0	1	92.8932	100	1785	70.2625	86.4594	123.69	0.68438	0.93559	0.875
	Lysotracker	Proximal	Mock	Ctrl	Ctrl P2 Lyso Mock.tif Lyso.csv	1.33019	1.45814	0.78062	1.20385	0.82561	163.363	0.869	199.057	100	3825	67.525	87.1438	149.036	0.9125	0.68581	0.83333
	Lysotracker	Proximal	Mock	Ctrl	Ctrl P2 Lyso Mock.tif Lyso.csv	1.02021	1.23565	0.52041	0.90485	0.73229	0	1	132.705	100	2550	85.0906	87.3719	153.435	0.68438	0.80929	0.90909
	Lysotracker	Proximal	Mock	Ctrl	Ctrl P3 Lyso Mock.tif Lyso.csv	1.02021	2.16507	0.26021	0.84693	0.39118	147.388	0.64114	66.3523	100	1275	109.044	24.8656	153.435	0.61247	0.46188	0.58824
	Lysotracker	Proximal	Mock	Ctrl	Ctrl P3 Lyso Mock.tif Lyso.csv	0.82252	1.5	0.31225	0.77223	0.51482	90	1	79.6228	100	1530	6.3875	25.3219	123.69	0.45625	0.66667	1
	Lysotracker	Proximal	Mock	Ctrl	Ctrl P3 Lyso Mock.tif Lyso.csv	2.16418	1.41557	2.39389	2.07717	1.46737	179.939	0.90931	610.441	100	11730	51.5563	25.7781	161.565	1.59688	0.70643	0.86792
	Lysotracker	Proximal	Mock	Ctrl	Ctrl P3 Lyso Mock.tif Lyso.csv	1.66078	1.6457	1.09286	1.51326	0.91952	176.988	0.94307	278.68	100	5355	57.0313	26.2344	164.055	0.9125	0.60764	0.875
	Lysotracker	Proximal	Mock	Ctrl	Ctrl P3 Lyso Mock.tif Lyso.csv	1.02021	2.23662	0.31225	0.94297	0.42161	167.067	0.91631	79.6228	100	1530	12.775	26.2344	153.435	0.45625	0.4471	0.85714
	Lysotracker	Proximal	Mock	Ctrl	Ctrl P3 Lyso Mock.tif Lyso.csv	1.33019	1.4413	0.83266	1.23613	0.85765	0	0.95824	212.327	100	4080	58.8563	26.4625	149.036	0.9125	0.69382	0.88889
	Lysotracker	Proximal	Mock	Ctrl	Ctrl P3 Lyso Mock.tif Lyso.csv	1.53031	1.59926	0.98878	1.41894	0.88725	0.60302	0.94449	252.139	100	4845	11.8625	29.2	153.435	0.9125	0.62529	0.88372
	Lysotracker	Proximal	Mock	Ctrl	Ctrl P3 Lyso Mock.tif Lyso.csv	1.73735	1.1252	1.66531	1.54461	1.37274	172.58	1	424.655	100	8160	80.3	30.5688	23.1986	1.36875	0.88873	0.88889
	Lysotracker	Proximal	Mock	Ctrl	Ctrl P3 Lyso Mock.tif Lyso.csv	0.96785	1.24813	0.31225	0.70442	0.56438	170.783	0.58905	79.6228	100	1530	18.9344	29.8844	135	0.68438	0.8012	0.66667
	Lysotracker	Proximal	Mock	Ctrl	Ctrl P3 Lyso Mock.tif Lyso.csv	1.44279	1.32338	0.8847	1.22094	0.92259	6.793	0.81985	225.598	100	4335	107.903	30.5688	18.435	0.9125	0.75564	0.80952
	Lysotracker	Proximal	Mock	Ctrl	Ctrl P3 Lyso Mock.tif Lyso.csv	0.82252	1.55299	0.26021	0.71729	0.46188	108.435	1	66.3523	100	1275	54.75	30.3406	123.69	0.45625	0.64392	0.90909
	Lysotracker	Proximal	Mock	Ctrl	Ctrl P3 Lyso Mock.tif Lyso.csv	0.72139	1.4676	0.20816	0.62368	0.42497	90	0.85737	53.0819	100	1020	72.5438	30.3406	108.435	0.45625	0.68139	0.8
	Lysotracker	Proximal	Mock	Ctrl	Ctrl P3 Lyso Mock.tif Lyso.csv	1.22849	1.20894	0.83266	1.13212	0.93645	0	1	212.327	100	4080	41.975	31.4812	158.199	0.9125	0.82717	0.88889
	Lysotracker	Proximal	Mock	Ctrl	Ctrl P3 Lyso Mock.tif Lyso.csv	1.22849	1.18561	0.78062	1.08554	0.91559	95.8841	0.97567	199.057	100	3825	114.291	31.2531	111.801	0.9125	0.84344	0.88235
	Lysotracker	Proximal	Mock	Ctrl	Ctrl P3 Lyso Mock.tif Lyso.csv	1.22849	1.11939	0.78062	1.05478	0.94229	45	0.869	199.057	100	3825	75.0531	32.3937	21.8014	1.12257	0.89335	0.78947
	Lysotracker	Proximal	Mock	Ctrl	Ctrl P3 Lyso Mock.tif Lyso.csv	2.46755	1.64699	2.23776	2.16625	1.31528	162.167	0.68718	570.63	100	10965	97.8656	33.9906	146.31	1.59688	0.60717	0.81132
	Lysotracker	Proximal	Mock	Ctrl	Ctrl P3 Lyso Mock.tif Lyso.csv	1.66078	2.12392	0.8847	1.54675	0.72826	17.0978	0.64906	225.598	100	4335	12.0906	35.1313	15.9454	0.9125	0.47083	0.75556
	Lysotracker	Proximal	Mock	Ctrl	Ctrl P3 Lyso Mock.tif Lyso.csv	1.02021	1.79235	0.31225	0.84414	0.47097	56.5993	0.68581	79.6228	100	1530	50.6438	36.7281	63.435	0.64524	0.55793	0.66667
	Lysotracker	Proximal	Mock	Ctrl	Ctrl P3 Lyso Mock.tif Lyso.csv	0.82252	2.03127	0.20816	0.73374	0.36122	58.2825	0.85737	53.0819	100	1020	106.078	37.8688	56.3099	0.45625	0.4923	0.8
	Lysotracker	Proximal	Mock	Ctrl	Ctrl P3 Lyso Mock.tif Lyso.csv	0.96785	1.37971	0.36429	0.79997	0.57981	120.473	1	92.8932	100	1785	67.0688	80.5281	135	0.68438	0.72479	0.875
	Lysotracker	Proximal	Mock	Ctrl	Ctrl P3 Lyso Mock.tif Lyso.csv	1.61309	2.37896	0.67653	1.4315	0.60174	7.55479	0.58381	172.516	100	3315	52.2406	82.3531	171.87	0.68438	0.42035	0.74286
	Lysotracker	Proximal	Mock	Ctrl	Ctrl P3 Lyso Mock.tif Lyso.csv	3.88483	1.8198	4.68369	3.29428	1.81024	145.649	0.48511	1194.34	100	22950	31.4812	82.8094	139.764	2.56406	0.54951	0.68441
	Lysotracker	Proximal	Mock	Ctrl	Ctrl P3 Lyso Mock.tif Lyso.csv	1.78171	1.2918	1.61327	1.62894	1.26099	116.744	0.90669	411.384	100	7905	115.203	83.2656	129.806	1.36875	0.77412	0.86111
	Lysotracker	Proximal	Mock	Ctrl	Ctrl P3 Lyso Mock.tif Lyso.csv	1.46071	1.34806	0.98878	1.30275	0.96638	65.5779	0.91631	252.139	100	4845	44.9406	84.6344	38.6598	1.12257	0.74181	0.82609
	Lysotracker	Proximal	Mock	Ctrl	Ctrl P3 Lyso Mock.tif Lyso.csv	1.02021	1.3723	0.41633	0.8529	0.62151	88.2118	0.91441	106.164	100	2040	67.525	83.4938	116.565	0.68438	0.7287	0.8
	Lysotracker	Proximal	Mock	Ctrl	Ctrl P3 Lyso Mock.tif Lyso.csv	0.82252	1.63672	0.20816	0.65864	0.40241	104.872	0.69813	53.0819	100	1020	37.8688	83.95	123.69	0.45625	0.61098	0.72727
	Lysotracker	Proximal	Mock	Ctrl	Ctrl P3 Lyso Mock.tif Lyso.csv	0.96785	2.30821	0.26021	0.87448	0.37886	135	0.87266	66.3523	100	1275	55.6625	84.8625	135	0.48393	0.43324	0.76923
	Lysotracker	Proximal	Mock	Ctrl	Ctrl P3 Lyso Mock.tif Lyso.csv	1.64503	1.039	1.45715	1.3884	1.33629	136.431	0.92001	371.573	100	7140	6.15938	85.0906	123.69	1.36875	0.96246	0.875
	Lysotracker	Proximal	Mock	Ctrl	Ctrl P3 Lyso Mock.tif Lyso.csv	0.96785	1.22859	0.41633	0.80701	0.65686	135	1	106.164	100	2040	58.1719	87.1438	135	0.68438	0.81394	0.94118
	Lysotracker	Proximal	Mock	Ctrl	Ctrl P3 Lyso Mock.tif Lyso.csv	1.44279	1.51763	0.8847	1.30748	0.86153	9.31729	0.91096	225.598	100	4335	61.5938	87.3719	161.565	0.9125	0.65892	0.85
	Lysotracker	Proximal	Mock	Ctrl	Ctrl P3 Lyso Mock.tif Lyso.csv	1.64503	1.55993	1.09286	1.4733	0.94446	30.317	0.85617	278.68	100	5355	86.9156	88.2844	33.6901	1.12916	0.64105	0.85714
	Lysotracker	Proximal	Mock	Ctrl	Ctrl P3 Lyso Mock.tif Lyso.csv	0.64524	1	0.20816	0.51482	0.51482	0	1	53.0819	100	1020	67.2969	87.6	135	0.45625	1	1
	Lysotracker	Proximal	Mock	Ctrl	Ctrl P3 Lyso Mock.tif Lyso.csv	0.82252	1.29099	0.31225	0.71642	0.55493	135	1	79.6228	100	1530	38.0969	87.8281	123.69	0.64524	0.7746	0.8
	Lysotracker	Proximal	Mock	Ctrl	Ctrl P3 Lyso Mock.tif Lyso.csv	1.02021	1.41576	0.41633	0.8663	0.6119	172.982	1	106.164	100	2040	106.078	87.8281	153.435	0.68438	0.70633	0.8
	Lysotracker	Proximal	Mock	Ctrl	Ctrl P3 Lyso Mock.tif Lyso.csv	0.64524	1	0.20816	0.51482	0.51482	0	1	53.0819	100	1020	32.85	89.6531	135	0.45625	1	1
	Lysotracker	Proximal	Mock	Ctrl	Ctrl P3 Lyso Mock.tif Lyso.csv	1.66078	1.38891	0.78062	1.17492	0.84594	9.85399	0.41888	199.057	100	3825	81.6688	93.9875	15.9454	1.14063	0.71999	0.58824
	Lysotracker	Proximal	Mock	Ctrl	Ctrl P3 Lyso Mock.tif Lyso.csv	1.93571	2.76785	0.72857	1.60237	0.57892	150.22	0.43364	185.786	100	3570	114.519	93.9875	135	0.81779	0.36129	0.56
	Lysotracker	Proximal	Mock	Ctrl	Ctrl P4 Lyso Mock.tif Lyso.csv	1.53031	1.5425	1.1449	1.49952	0.97213	180	1	291.95	100	5610	14.6	26.6906	153.435	0.9125	0.6483	0.95652
	Lysotracker	Proximal	Mock	Ctrl	Ctrl P4 Lyso Mock.tif Lyso.csv	1.02021	1.34027	0.46837	0.89402	0.66704	159.699	1	119.434	100	2295	53.1531	28.0594	153.435	0.68438	0.74612	0.85714
	Lysotracker	Proximal	Mock	Ctrl	Ctrl P4 Lyso Mock.tif Lyso.csv	1.02021	1.24108	0.52041	0.90683	0.73068	135	0.98175	132.705	100	2550	59.9969	28.0594	116.565	0.80654	0.80575	0.8
	Lysotracker	Proximal	Mock	Ctrl	Ctrl P4 Lyso Mock.tif Lyso.csv	1.02021	1.23565	0.52041	0.90485	0.73229	90	1	132.705	100	2550	65.2438	28.0594	116.565	0.68438	0.80929	0.90909
	Lysotracker	Proximal	Mock	Ctrl	Ctrl P4 Lyso Mock.tif Lyso.csv	1.02021	1.79235	0.31225	0.84414	0.47097	33.4007	0.68581	79.6228	100	1530	84.8625	29.4281	26.565	0.64524	0.55793	0.66667
	Lysotracker	Proximal	Mock	Ctrl	Ctrl P4 Lyso Mock.tif Lyso.csv	1.8392	1.8858	1.30103	1.76745	0.93724	140.201	0.87295	331.762	100	6375	76.1938	29.2	150.255	1.12916	0.53028	0.78125
	Lysotracker	Proximal	Mock	Ctrl	Ctrl P4 Lyso Mock.tif Lyso.csv	1.73735	1.16833	1.61327	1.54914	1.32595	10.3571	1	411.384	100	7905	40.8344	30.5688	23.1986	1.36875	0.85592	0.88571
	Lysotracker	Proximal	Mock	Ctrl	Ctrl P4 Lyso Mock.tif Lyso.csv	1.46071	1.06179	1.09286	1.21551	1.14477	159.699	1	278.68	100	5355	110.413	29.6562	141.34	1.14063	0.9418	0.91304
	Lysotracker	Proximal	Mock	Ctrl	Ctrl P4 Lyso Mock.tif Lyso.csv	1.88117	1.35154	1.66531	1.69285	1.25253	1.38372	0.91441	424.655	100	8160	31.9375	30.7969	14.0362	1.36875	0.7399	0.84211
	Lysotracker	Proximal	Mock	Ctrl	Ctrl P4 Lyso Mock.tif Lyso.csv	1.44279	1.16998	0.98878	1.21365	1.03732	65.3007	0.91631	252.139	100	4845	53.8375	31.4812	71.565	1.14063	0.85471	0.80851
	Lysotracker	Proximal	Mock	Ctrl	Ctrl P4 Lyso Mock.tif Lyso.csv	0.94058	1.19523	0.41633	0.79597	0.66596	0	1	106.164	100	2040	106.306	31.2531	165.964	0.68438	0.83666	0.8
	Lysotracker	Proximal	Mock	Ctrl	Ctrl P4 Lyso Mock.tif Lyso.csv	0.82252	1.55299	0.26021	0.71729	0.46188	18.435	1	66.3523	100	1275	88.5125	31.7094	33.6901	0.45625	0.64392	0.90909
	Lysotracker	Proximal	Mock	Ctrl	Ctrl P4 Lyso Mock.tif Lyso.csv	1.66078	1.52559	0.72857	1.18963	0.77978	164.71	0.5205	185.786	100	3570	11.1781	36.0438	164.055	0.9125	0.65549	0.63636
	Lysotracker	Proximal	Mock	Ctrl	Ctrl P4 Lyso Mock.tif Lyso.csv	1.29047	1.56048	0.57245	1.06648	0.68343	35.0085	0.88676	145.975	100	2805	101.059	37.6406	45	0.88683	0.64083	0.84615
	Lysotracker	Proximal	Mock	Ctrl	Ctrl P4 Lyso Mock.tif Lyso.csv	1.33019	1.08791	0.78062	1.03985	0.95582	107.143	0.7234	199.057	100	3825	86.4594	39.2375	120.964	1.0825	0.91919	0.76923
	Lysotracker	Proximal	Mock	Ctrl	Ctrl P4 Lyso Mock.tif Lyso.csv	1.22849	1.57861	0.62449	1.12036	0.70971	170.583	0.96737	159.246	100	3060	39.0094	83.4938	158.199	0.68438	0.63347	0.88889
	Lysotracker	Proximal	Mock	Ctrl	Ctrl P4 Lyso Mock.tif Lyso.csv	1.53031	1.22197	1.24898	1.394	1.14078	19.6049	1	318.491	100	6120	84.4063	84.1781	26.565	1.14063	0.81835	0.90566
	Lysotracker	Proximal	Mock	Ctrl	Ctrl P4 Lyso Mock.tif Lyso.csv	0.64524	1	0.20816	0.51482	0.51482	0	1	53.0819	100	1020	5.70313	83.7219	135	0.45625	1	1
	Lysotracker	Proximal	Mock	Ctrl	Ctrl P4 Lyso Mock.tif Lyso.csv	0.82252	1.06885	0.36429	0.7041	0.65875	0	1	92.8932	100	1785	80.7563	83.7219	123.69	0.68438	0.93559	0.875
	Lysotracker	Proximal	Mock	Ctrl	Ctrl P4 Lyso Mock.tif Lyso.csv	0.64524	1.46385	0.15612	0.53943	0.3685	45	1	39.8114	100	765	58.4	84.6344	45	0.45625	0.68313	0.85714
	Lysotracker	Proximal	Mock	Ctrl	Ctrl P4 Lyso Mock.tif Lyso.csv	3.04357	1.81305	3.64287	2.89989	1.59946	2.45587	0.77002	928.932	100	17850	81.6688	84.6344	167.005	1.59688	0.55156	0.89172
	Lysotracker	Proximal	Mock	Ctrl	Ctrl P4 Lyso Mock.tif Lyso.csv	2.60103	2.16235	2.08164	2.39398	1.10712	44.9871	0.53586	530.819	100	10200	84.8625	86.0031	37.875	1.52184	0.46246	0.70796
	Lysotracker	Proximal	Mock	Ctrl	Ctrl P4 Lyso Mock.tif Lyso.csv	1.22849	1.75572	0.62449	1.18153	0.67296	4.83668	0.96737	159.246	100	3060	114.747	84.4063	158.199	0.68438	0.56957	0.88889
	Lysotracker	Proximal	Mock	Ctrl	Ctrl P4 Lyso Mock.tif Lyso.csv	0.82252	1.06885	0.36429	0.7041	0.65875	0	1	92.8932	100	1785	90.5656	84.6344	123.69	0.68438	0.93559	0.875
	Lysotracker	Proximal	Mock	Ctrl	Ctrl P4 Lyso Mock.tif Lyso.csv	0.96785	2.52982	0.20816	0.81885	0.32368	45	0.61088	53.0819	100	1020	53.6094	85.775	45	0.48393	0.39529	0.61538
	Lysotracker	Proximal	Mock	Ctrl	Ctrl P4 Lyso Mock.tif Lyso.csv	1.14063	1.54433	0.52041	1.01158	0.65502	22.7407	0.88747	132.705	100	2550	39.4656	86.0031	36.8699	0.79378	0.64753	0.76923
	Lysotracker	Proximal	Mock	Ctrl	Ctrl P4 Lyso Mock.tif Lyso.csv	1.96241	1.79603	1.40511	1.79253	0.99805	31.2055	0.8363	358.303	100	6885	115.203	86.9156	35.5377	1.22436	0.55678	0.80597
	Lysotracker	Proximal	Mock	Ctrl	Ctrl P4 Lyso Mock.tif Lyso.csv	1.33019	2.50987	0.52041	1.2896	0.51381	160.763	0.88747	132.705	100	2550	105.166	86.0031	149.036	0.64983	0.39843	0.8
	Lysotracker	Proximal	Mock	Ctrl	Ctrl P4 Lyso Mock.tif Lyso.csv	2.10321	2.28666	1.35307	1.98479	0.86799	8.39333	0.66641	345.032	100	6630	90.7938	86.9156	12.5288	1.03062	0.43732	0.77612
	Lysotracker	Proximal	Mock	Ctrl	Ctrl P4 Lyso Mock.tif Lyso.csv	0.64524	1	0.20816	0.51482	0.51482	0	1	53.0819	100	1020	93.5313	86.4594	135	0.45625	1	1
	Lysotracker	Proximal	Mock	Ctrl	Ctrl P4 Lyso Mock.tif Lyso.csv	2.55052	2.32856	1.87348	2.3568	1.01213	169.47	0.50126	477.737	100	9180	109.956	87.3719	10.3049	1.26018	0.42945	0.69903
	Lysotracker	Proximal	Mock	Ctrl	Ctrl P4 Lyso Mock.tif Lyso.csv	0.82252	1.55299	0.26021	0.71729	0.46188	18.435	1	66.3523	100	1275	41.5188	87.1438	33.6901	0.45625	0.64392	0.90909
	Lysotracker	Proximal	Mock	Ctrl	Ctrl P4 Lyso Mock.tif Lyso.csv	0.96785	1	0.46837	0.77223	0.77223	0	1	119.434	100	2295	51.3281	86.6875	135	0.68438	1	1
	Lysotracker	Proximal	Mock	Ctrl	Ctrl P4 Lyso Mock.tif Lyso.csv	2.04041	1.5152	1.66531	1.79241	1.18295	3.23257	0.8852	424.655	100	8160	87.6	87.8281	26.565	1.14063	0.65998	0.90141
	Lysotracker	Proximal	Mock	Ctrl	Ctrl P4 Lyso Mock.tif Lyso.csv	1.02021	1.5362	0.46837	0.95713	0.62305	173.953	1	119.434	100	2295	55.8906	86.9156	153.435	0.68438	0.65096	0.85714
	Lysotracker	Proximal	Mock	Ctrl	Ctrl P4 Lyso Mock.tif Lyso.csv	1.53031	1.42859	1.04082	1.37593	0.96314	12.1246	0.9942	265.409	100	5100	72.7719	87.8281	26.565	0.9125	0.69999	0.90909
	Lysotracker	Proximal	Mock	Ctrl	Ctrl P4 Lyso Mock.tif Lyso.csv	1.33019	1.66226	0.72857	1.24177	0.74704	172.839	1	185.786	100	3570	83.95	87.1438	149.036	0.68438	0.60159	0.96552
	Lysotracker	Proximal	Mock	Ctrl	Ctrl P4 Lyso Mock.tif Lyso.csv	1.22849	1.74193	0.46837	1.01921	0.58511	95.102	0.5214	119.434	100	2295	41.5188	87.3719	111.801	0.68438	0.57408	0.66667
	Lysotracker	Proximal	Mock	Ctrl	Ctrl P4 Lyso Mock.tif Lyso.csv	1.53031	1.58431	0.98878	1.41229	0.89143	152.132	0.91631	252.139	100	4845	92.6188	87.6	153.435	1.02078	0.63119	0.82609
	Lysotracker	Proximal	Mock	Ctrl	Ctrl P4 Lyso Mock.tif Lyso.csv	0.82252	1.29099	0.31225	0.71642	0.55493	45	1	79.6228	100	1530	100.831	88.0563	33.6901	0.64524	0.7746	0.8
	Lysotracker	Proximal	Mock	Ctrl	Ctrl P4 Lyso Mock.tif Lyso.csv	1.02021	1.93571	0.36429	0.94754	0.48951	8.34962	0.94327	92.8932	100	1785	91.0219	88.2844	26.565	0.45625	0.51661	0.93333
	Lysotracker	Proximal	Mock	Ctrl	Ctrl P4 Lyso Mock.tif Lyso.csv	0.96785	1.22859	0.41633	0.80701	0.65686	45.0002	1	106.164	100	2040	106.763	88.5125	45	0.68438	0.81394	0.94118
	Lysotracker	Proximal	Mock	Ctrl	Ctrl P4 Lyso Mock.tif Lyso.csv	1.33019	3.66942	0.26021	1.10258	0.30048	152.108	0.44373	66.3523	100	1275	40.8344	88.5125	149.036	0.51068	0.27252	0.55556
	Lysotracker	Proximal	Mock	Ctrl	Ctrl P4 Lyso Mock.tif Lyso.csv	2.24677	1.11725	2.55001	1.90459	1.70471	129.397	0.8845	650.253	100	12495	92.8469	88.7406	113.962	1.825	0.89505	0.85965
	Lysotracker	Proximal	Mock	Ctrl	Ctrl P4 Lyso Mock.tif Lyso.csv	1.53031	1.73216	0.93674	1.43734	0.82979	3.61846	0.89478	238.868	100	4590	110.184	90.3375	26.565	0.9125	0.57731	0.85714
	Lysotracker	Proximal	Mock	Ctrl	Ctrl P5 Lyso Mock.tif Lyso.csv	0.64524	1.46385	0.15612	0.53943	0.3685	135	1	39.8114	100	765	48.1344	18.9344	135	0.45625	0.68313	0.85714
	Lysotracker	Proximal	Mock	Ctrl	Ctrl P5 Lyso Mock.tif Lyso.csv	0.72139	1	0.26021	0.57559	0.57559	0	0.87266	66.3523	100	1275	24.1812	21.9	108.435	0.64524	1	0.71429
	Lysotracker	Proximal	Mock	Ctrl	Ctrl P5 Lyso Mock.tif Lyso.csv	0.64524	1.46385	0.15612	0.53943	0.3685	45	1	39.8114	100	765	53.6094	22.3562	45	0.45625	0.68313	0.85714
	Lysotracker	Proximal	Mock	Ctrl	Ctrl P5 Lyso Mock.tif Lyso.csv	1.16321	1.97752	0.36429	0.95772	0.4843	12.4524	0.49626	92.8932	100	1785	86.4594	22.1281	168.69	0.64983	0.50568	0.6087
	Lysotracker	Proximal	Mock	Ctrl	Ctrl P5 Lyso Mock.tif Lyso.csv	0.64524	1	0.20816	0.51482	0.51482	0	1	53.0819	100	1020	104.481	21.9	135	0.45625	1	1
	Lysotracker	Proximal	Mock	Ctrl	Ctrl P5 Lyso Mock.tif Lyso.csv	2.16418	2.04156	1.56123	2.01451	0.98675	7.28653	0.6656	398.114	100	7650	114.291	22.8125	18.435	1.14063	0.48982	0.75
	Lysotracker	Proximal	Mock	Ctrl	Ctrl P5 Lyso Mock.tif Lyso.csv	0.82252	1.55299	0.26021	0.71729	0.46188	71.565	1	66.3523	100	1275	80.5281	22.8125	56.3099	0.45625	0.64392	0.90909
	Lysotracker	Proximal	Mock	Ctrl	Ctrl P5 Lyso Mock.tif Lyso.csv	0.64524	1	0.20816	0.51482	0.51482	0	1	53.0819	100	1020	36.5	22.3562	135	0.45625	1	1
	Lysotracker	Proximal	Mock	Ctrl	Ctrl P5 Lyso Mock.tif Lyso.csv	0.82252	1.5	0.31225	0.77223	0.51482	90	1	79.6228	100	1530	63.6469	22.3562	123.69	0.45625	0.66667	1
	Lysotracker	Proximal	Mock	Ctrl	Ctrl P5 Lyso Mock.tif Lyso.csv	1.66078	1.5093	1.1449	1.48329	0.98277	161.063	0.78823	291.95	100	5610	84.4063	22.8125	164.055	1.14063	0.66256	0.81481
	Lysotracker	Proximal	Mock	Ctrl	Ctrl P5 Lyso Mock.tif Lyso.csv	2.28125	1.87478	1.50919	1.89802	1.0124	114.802	0.46345	384.843	100	7395	89.8813	22.3562	126.87	1.45178	0.5334	0.66667
	Lysotracker	Proximal	Mock	Ctrl	Ctrl P5 Lyso Mock.tif Lyso.csv	2.16418	1.29899	1.66531	1.65961	1.27761	2.12309	0.42869	424.655	100	8160	108.588	23.4969	18.435	1.54944	0.76983	0.7033
	Lysotracker	Proximal	Mock	Ctrl	Ctrl P5 Lyso Mock.tif Lyso.csv	3.04357	2.22434	2.9143	2.87292	1.29158	177.043	0.63793	743.146	100	14280	37.8688	22.8125	167.005	1.36875	0.44957	0.82353
	Lysotracker	Proximal	Mock	Ctrl	Ctrl P5 Lyso Mock.tif Lyso.csv	1.44279	2.95292	0.52041	1.3988	0.4737	173.979	0.67377	132.705	100	2550	57.7156	22.5844	161.565	0.45625	0.33865	0.90909
	Lysotracker	Proximal	Mock	Ctrl	Ctrl P5 Lyso Mock.tif Lyso.csv	0.82252	1.55299	0.26021	0.71729	0.46188	161.565	1	66.3523	100	1275	65.2438	22.5844	146.31	0.45625	0.64392	0.90909
	Lysotracker	Proximal	Mock	Ctrl	Ctrl P5 Lyso Mock.tif Lyso.csv	1.66078	2.29444	0.93674	1.65425	0.72098	179.64	0.75457	238.868	100	4590	77.5625	22.5844	164.055	0.68438	0.43584	0.9
	Lysotracker	Proximal	Mock	Ctrl	Ctrl P5 Lyso Mock.tif Lyso.csv	1.8392	2.84674	0.83266	1.73725	0.61026	178.259	0.52572	212.327	100	4080	51.1	23.0406	172.875	0.68438	0.35128	0.72727
	Lysotracker	Proximal	Mock	Ctrl	Ctrl P5 Lyso Mock.tif Lyso.csv	0.72139	1.4676	0.20816	0.62368	0.42497	0	1	53.0819	100	1020	72.7719	22.8125	161.565	0.45625	0.68139	0.8
	Lysotracker	Proximal	Mock	Ctrl	Ctrl P5 Lyso Mock.tif Lyso.csv	0.64524	1	0.20816	0.51482	0.51482	0	1	53.0819	100	1020	82.8094	22.8125	135	0.45625	1	1
	Lysotracker	Proximal	Mock	Ctrl	Ctrl P5 Lyso Mock.tif Lyso.csv	1.14063	1.2433	0.46837	0.86107	0.69257	107.348	0.79872	119.434	100	2295	12.775	23.0406	126.87	0.68438	0.80431	0.81818
	Lysotracker	Proximal	Mock	Ctrl	Ctrl P5 Lyso Mock.tif Lyso.csv	1.22849	1.42045	0.67653	1.10615	0.77873	70.2059	0.92163	172.516	100	3315	99.9188	24.1812	68.1986	0.9125	0.704	0.8125
	Lysotracker	Proximal	Mock	Ctrl	Ctrl P5 Lyso Mock.tif Lyso.csv	1.44279	1.7375	0.72857	1.26956	0.73068	152.723	0.81106	185.786	100	3570	101.288	23.9531	161.565	0.9125	0.57554	0.75676
	Lysotracker	Proximal	Mock	Ctrl	Ctrl P5 Lyso Mock.tif Lyso.csv	1.22849	1.53161	0.57245	1.05657	0.68984	6.76793	0.77984	145.975	100	2805	57.4875	24.6375	21.8014	0.9125	0.65291	0.73333
	Lysotracker	Proximal	Mock	Ctrl	Ctrl P5 Lyso Mock.tif Lyso.csv	0.64524	1.46385	0.15612	0.53943	0.3685	135	1	39.8114	100	765	41.7469	24.6375	135	0.45625	0.68313	0.85714
	Lysotracker	Proximal	Mock	Ctrl	Ctrl P5 Lyso Mock.tif Lyso.csv	0.82252	1.55299	0.26021	0.71729	0.46188	161.565	1	66.3523	100	1275	50.8719	25.0938	146.31	0.45625	0.64392	0.90909
	Lysotracker	Proximal	Mock	Ctrl	Ctrl P5 Lyso Mock.tif Lyso.csv	0.72139	1.4676	0.20816	0.62368	0.42497	90	0.85737	53.0819	100	1020	76.8781	25.3219	108.435	0.45625	0.68139	0.8
	Lysotracker	Proximal	Mock	Ctrl	Ctrl P5 Lyso Mock.tif Lyso.csv	1.96241	1.23087	1.66531	1.6155	1.3125	22.6536	0.76211	424.655	100	8160	49.275	26.9187	35.5377	1.42852	0.81244	0.81013
	Lysotracker	Proximal	Mock	Ctrl	Ctrl P5 Lyso Mock.tif Lyso.csv	1.66078	2.11909	0.8847	1.545	0.72908	0.2086	0.59361	225.598	100	4335	113.834	26.0063	164.055	0.9125	0.4719	0.7234
	Lysotracker	Proximal	Mock	Ctrl	Ctrl P5 Lyso Mock.tif Lyso.csv	1.14063	1.09279	0.67653	0.97022	0.88783	149.036	1	172.516	100	3315	56.8031	27.1469	126.87	0.9125	0.91509	0.89655
	Lysotracker	Proximal	Mock	Ctrl	Ctrl P5 Lyso Mock.tif Lyso.csv	0.72139	3	0.15612	0.77223	0.25741	0	0.96737	39.8114	100	765	70.2625	27.1469	161.565	0.22813	0.33333	1
	Lysotracker	Proximal	Mock	Ctrl	Ctrl P5 Lyso Mock.tif Lyso.csv	2.10321	1.42851	1.87348	1.84595	1.29223	65.0253	0.67968	477.737	100	9180	46.0813	34.9031	40.6013	1.59688	0.70003	0.80899
	Lysotracker	Proximal	Mock	Ctrl	Ctrl P5 Lyso Mock.tif Lyso.csv	1.8392	1.1136	1.92552	1.65232	1.48376	0	1	491.007	100	9435	47.6781	78.2469	150.255	1.59688	0.89799	0.88095
	Lysotracker	Proximal	Mock	Ctrl	Ctrl P5 Lyso Mock.tif Lyso.csv	1.88117	2.08947	1.09286	1.70512	0.81606	172.099	0.4438	278.68	100	5355	107.219	78.9313	165.964	1.14063	0.47859	0.66667
	Lysotracker	Proximal	Mock	Ctrl	Ctrl P5 Lyso Mock.tif Lyso.csv	0.82252	1.55299	0.26021	0.71729	0.46188	108.435	1	66.3523	100	1275	31.9375	78.475	123.69	0.45625	0.64392	0.90909
	Lysotracker	Proximal	Mock	Ctrl	Ctrl P5 Lyso Mock.tif Lyso.csv	2.3817	1.13901	2.96634	2.07409	1.82097	111.689	0.91092	756.416	100	14535	73	78.475	106.699	2.02548	0.87796	0.85075
	Lysotracker	Proximal	Mock	Ctrl	Ctrl P5 Lyso Mock.tif Lyso.csv	1.02021	1.23565	0.52041	0.90485	0.73229	90	1	132.705	100	2550	75.7375	78.7031	116.565	0.68438	0.80929	0.90909
	Lysotracker	Proximal	Mock	Ctrl	Ctrl P5 Lyso Mock.tif Lyso.csv	0.64524	1.46385	0.15612	0.53943	0.3685	135	1	39.8114	100	765	14.3719	79.3875	135	0.45625	0.68313	0.85714
	Lysotracker	Proximal	Mock	Ctrl	Ctrl P5 Lyso Mock.tif Lyso.csv	1.33019	1.29166	0.72857	1.09463	0.84746	32.4915	0.81106	185.786	100	3570	59.5406	80.7563	59.0362	1.01012	0.7742	0.73684
	Lysotracker	Proximal	Mock	Ctrl	Ctrl P5 Lyso Mock.tif Lyso.csv	2.16418	1.30033	2.08164	1.85646	1.42768	83.4053	0.44264	530.819	100	10200	55.6625	82.3531	71.565	1.80471	0.76904	0.71429
	Lysotracker	Proximal	Mock	Ctrl	Ctrl P5 Lyso Mock.tif Lyso.csv	1.02021	2.11942	0.31225	0.91794	0.43311	6.2644	0.68581	79.6228	100	1530	15.0563	81.4406	26.565	0.45625	0.47183	0.8
	Lysotracker	Proximal	Mock	Ctrl	Ctrl P5 Lyso Mock.tif Lyso.csv	2.16418	1.42075	1.97756	1.89138	1.33125	2.63747	0.78733	504.278	100	9690	63.4188	82.5813	18.435	1.58756	0.70385	0.8
	Lysotracker	Proximal	Mock	Ctrl	Ctrl P5 Lyso Mock.tif Lyso.csv	1.02021	1.03507	0.57245	0.86858	0.83915	135	0.97622	145.975	100	2805	23.4969	82.3531	116.565	0.9125	0.96612	0.84615
	Lysotracker	Proximal	Mock	Ctrl	Ctrl P5 Lyso Mock.tif Lyso.csv	1.22849	1.06865	0.67653	0.95944	0.89781	11.3099	1	172.516	100	3315	70.7188	83.2656	21.8014	0.9125	0.93576	0.78788
	Lysotracker	Proximal	Mock	Ctrl	Ctrl P5 Lyso Mock.tif Lyso.csv	0.94058	1.19523	0.41633	0.79597	0.66596	90	0.91441	106.164	100	2040	104.709	83.2656	104.036	0.68438	0.83666	0.8
	Lysotracker	Proximal	Mock	Ctrl	Ctrl P5 Lyso Mock.tif Lyso.csv	0.82252	1.06885	0.36429	0.7041	0.65875	0	1	92.8932	100	1785	106.078	83.2656	123.69	0.68438	0.93559	0.875
	Lysotracker	Proximal	Mock	Ctrl	Ctrl P5 Lyso Mock.tif Lyso.csv	0.96785	1.22859	0.41633	0.80701	0.65686	135	1	106.164	100	2040	68.8938	84.1781	135	0.68438	0.81394	0.94118
	Lysotracker	Proximal	Mock	FUS	FUS P1 Lyso Mock.tif Lyso.csv	1.14063	1.55121	0.52041	1.01383	0.65357	153.435	1	132.705	100	2550	20.9875	24.6375	143.13	0.68438	0.64466	0.90909
	Lysotracker	Proximal	Mock	FUS	FUS P1 Lyso Mock.tif Lyso.csv	1.46071	1.72771	0.67653	1.21993	0.7061	140.093	0.58381	172.516	100	3315	2.7375	24.8656	128.66	0.95007	0.5788	0.68421
	Lysotracker	Proximal	Mock	FUS	FUS P1 Lyso Mock.tif Lyso.csv	0.82252	1.55299	0.26021	0.71729	0.46188	161.565	1	66.3523	100	1275	29.4281	24.8656	146.31	0.45625	0.64392	0.90909
	Lysotracker	Proximal	Mock	FUS	FUS P1 Lyso Mock.tif Lyso.csv	1.02021	1.34027	0.46837	0.89402	0.66704	159.699	1	119.434	100	2295	22.1281	25.3219	153.435	0.68438	0.74612	0.85714
	Lysotracker	Proximal	Mock	FUS	FUS P1 Lyso Mock.tif Lyso.csv	0.64524	1	0.20816	0.51482	0.51482	0	1	53.0819	100	1020	13.6875	25.3219	135	0.45625	1	1
	Lysotracker	Proximal	Mock	FUS	FUS P1 Lyso Mock.tif Lyso.csv	0.82252	2.70203	0.15612	0.73288	0.27123	151.845	0.75398	39.8114	100	765	23.2688	25.3219	146.31	0.40831	0.37009	0.66667
	Lysotracker	Proximal	Mock	FUS	FUS P1 Lyso Mock.tif Lyso.csv	1.02021	1.34027	0.46837	0.89402	0.66704	20.3007	1	119.434	100	2295	4.10625	26.0063	26.565	0.68438	0.74612	0.85714
	Lysotracker	Proximal	Mock	FUS	FUS P1 Lyso Mock.tif Lyso.csv	1.9491	1.97883	1.35307	1.84637	0.93306	4.15647	0.70313	345.032	100	6630	45.625	26.4625	20.556	1.14063	0.50535	0.77612
	Lysotracker	Proximal	Mock	FUS	FUS P1 Lyso Mock.tif Lyso.csv	1.96241	1.8787	1.30103	1.76411	0.93901	141.54	0.52834	331.762	100	6375	71.175	25.55	125.538	1.31394	0.53228	0.66667
	Lysotracker	Proximal	Mock	FUS	FUS P1 Lyso Mock.tif Lyso.csv	3.4747	1.81653	4.42349	3.19859	1.76082	165.35	0.79619	1127.99	100	21675	79.3875	25.7781	156.801	1.825	0.5505	0.91398
	Lysotracker	Proximal	Mock	FUS	FUS P1 Lyso Mock.tif Lyso.csv	3.06911	1.34537	3.53879	2.46209	1.83004	104.709	0.42443	902.391	100	17340	85.0906	25.7781	131.987	2.50938	0.74329	0.67662
	Lysotracker	Proximal	Mock	FUS	FUS P1 Lyso Mock.tif Lyso.csv	4.11258	1.63493	6.19288	3.59047	2.1961	27.7948	0.69806	1579.19	100	30345	18.7063	28.5156	19.44	2.58094	0.61165	0.83509
	Lysotracker	Proximal	Mock	FUS	FUS P1 Lyso Mock.tif Lyso.csv	0.64524	1.46385	0.15612	0.53943	0.3685	45	1	39.8114	100	765	40.6063	26.4625	45	0.45625	0.68313	0.85714
	Lysotracker	Proximal	Mock	FUS	FUS P1 Lyso Mock.tif Lyso.csv	0.82252	1.55299	0.26021	0.71729	0.46188	18.435	1	66.3523	100	1275	51.1	26.4625	33.6901	0.45625	0.64392	0.90909
	Lysotracker	Proximal	Mock	FUS	FUS P1 Lyso Mock.tif Lyso.csv	0.82252	1.55299	0.26021	0.71729	0.46188	161.565	1	66.3523	100	1275	63.875	26.0063	146.31	0.45625	0.64392	0.90909
	Lysotracker	Proximal	Mock	FUS	FUS P1 Lyso Mock.tif Lyso.csv	1.33019	2.5048	0.46837	1.22218	0.48794	135	0.56549	119.434	100	2295	67.7531	26.0063	120.964	0.64524	0.39923	0.6
	Lysotracker	Proximal	Mock	FUS	FUS P1 Lyso Mock.tif Lyso.csv	1.14063	1.55121	0.52041	1.01383	0.65357	26.565	1	132.705	100	2550	77.1063	26.6906	36.8699	0.68438	0.64466	0.90909
	Lysotracker	Proximal	Mock	FUS	FUS P1 Lyso Mock.tif Lyso.csv	1.66078	2.3085	0.78062	1.51474	0.65616	6.84113	0.74565	199.057	100	3825	108.131	26.9187	15.9454	0.68438	0.43318	0.83333
	Lysotracker	Proximal	Mock	FUS	FUS P1 Lyso Mock.tif Lyso.csv	0.82252	1.55299	0.26021	0.71729	0.46188	108.435	1	66.3523	100	1275	25.0938	26.4625	123.69	0.45625	0.64392	0.90909
	Lysotracker	Proximal	Mock	FUS	FUS P1 Lyso Mock.tif Lyso.csv	0.72139	1.4676	0.20816	0.62368	0.42497	90	0.85737	53.0819	100	1020	41.7469	26.9187	108.435	0.45625	0.68139	0.8
	Lysotracker	Proximal	Mock	FUS	FUS P1 Lyso Mock.tif Lyso.csv	2.45698	1.62259	2.39389	2.22388	1.37057	36.2351	0.85238	610.441	100	11730	68.8938	28.2875	21.8014	1.45178	0.6163	0.85185
	Lysotracker	Proximal	Mock	FUS	FUS P1 Lyso Mock.tif Lyso.csv	2.04041	1.27006	2.23776	1.90228	1.49779	168.447	1	570.63	100	10965	1.825	29.2	153.435	1.59688	0.78736	0.89583
	Lysotracker	Proximal	Mock	FUS	FUS P1 Lyso Mock.tif Lyso.csv	1.66078	1.10683	1.45715	1.43301	1.29469	3.39996	0.9777	371.573	100	7140	69.35	29.6562	164.055	1.36875	0.90348	0.84848
	Lysotracker	Proximal	Mock	FUS	FUS P1 Lyso Mock.tif Lyso.csv	0.64524	1.46385	0.15612	0.53943	0.3685	135	1	39.8114	100	765	85.0906	29.6562	135	0.45625	0.68313	0.85714
	Lysotracker	Proximal	Mock	FUS	FUS P1 Lyso Mock.tif Lyso.csv	1.14063	1.14806	0.67653	0.99445	0.8662	76.2236	1	172.516	100	3315	96.4969	29.8844	126.87	0.9125	0.87104	0.89655
	Lysotracker	Proximal	Mock	FUS	FUS P1 Lyso Mock.tif Lyso.csv	1.61309	1.20227	1.19694	1.35361	1.12587	45.0006	1	305.221	100	5865	7.3	31.2531	45	1.14063	0.83176	0.95833
	Lysotracker	Proximal	Mock	FUS	FUS P1 Lyso Mock.tif Lyso.csv	0.82252	1.5	0.31225	0.77223	0.51482	0	1	79.6228	100	1530	72.7719	30.3406	146.31	0.45625	0.66667	1
	Lysotracker	Proximal	Mock	FUS	FUS P1 Lyso Mock.tif Lyso.csv	1.22849	1.61866	0.57245	1.08618	0.67104	177.536	0.97622	145.975	100	2805	111.553	32.1656	158.199	0.68438	0.6178	0.84615
	Lysotracker	Proximal	Mock	FUS	FUS P1 Lyso Mock.tif Lyso.csv	3.76233	1.23137	6.24492	3.12905	2.54111	165.077	0.80224	1592.46	100	30600	42.6594	82.125	165.964	2.81731	0.8121	0.86022
	Lysotracker	Proximal	Mock	FUS	FUS P1 Lyso Mock.tif Lyso.csv	1.02021	1.23565	0.52041	0.90485	0.73229	0	1	132.705	100	2550	59.7688	82.3531	153.435	0.68438	0.80929	0.90909
	Lysotracker	Proximal	Mock	FUS	FUS P1 Lyso Mock.tif Lyso.csv	1.02021	1.32727	0.52041	0.9378	0.70656	90	1	132.705	100	2550	75.0531	83.2656	116.565	0.68438	0.75342	0.90909
	Lysotracker	Proximal	Mock	FUS	FUS P1 Lyso Mock.tif Lyso.csv	1.22849	1.22334	0.67653	1.02653	0.83913	11.3099	0.92163	172.516	100	3315	21.2156	85.0906	21.8014	0.9125	0.81744	0.8125
	Lysotracker	Proximal	Mock	FUS	FUS P1 Lyso Mock.tif Lyso.csv	1.02021	1.23565	0.52041	0.90485	0.73229	0	1	132.705	100	2550	39.9219	85.0906	153.435	0.68438	0.80929	0.90909
	Lysotracker	Proximal	Mock	FUS	FUS P1 Lyso Mock.tif Lyso.csv	1.53031	1.00582	1.35307	1.31636	1.30874	165.964	0.99267	345.032	100	6630	105.85	85.0906	116.565	1.36875	0.99421	0.86667
	Lysotracker	Proximal	Mock	FUS	FUS P1 Lyso Mock.tif Lyso.csv	1.14063	1.45045	0.57245	1.0282	0.70888	48.9717	1	145.975	100	2805	11.8625	86.9156	36.8699	0.80654	0.68944	0.84615
	Lysotracker	Proximal	Mock	FUS	FUS P1 Lyso Mock.tif Lyso.csv	1.44279	1.36719	0.8847	1.24099	0.90769	19.5681	0.91096	225.598	100	4335	66.1563	86.9156	18.435	0.9125	0.73143	0.85
	Lysotracker	Proximal	Mock	FUS	FUS P1 Lyso Mock.tif Lyso.csv	0.96785	1.22859	0.41633	0.80701	0.65686	45.0002	1	106.164	100	2040	33.0781	87.3719	45	0.68438	0.81394	0.94118
	Lysotracker	Proximal	Mock	FUS	FUS P1 Lyso Mock.tif Lyso.csv	1.22849	1.20894	0.83266	1.13212	0.93645	0	1	212.327	100	4080	36.9563	86.9156	158.199	0.9125	0.82717	0.88889
	Lysotracker	Proximal	Mock	FUS	FUS P1 Lyso Mock.tif Lyso.csv	2.46755	2.22856	1.82144	2.27339	1.02012	46.8338	0.53668	464.466	100	8925	75.7375	88.9688	56.3099	1.45178	0.44872	0.70707
	Lysotracker	Proximal	Mock	FUS	FUS P1 Lyso Mock.tif Lyso.csv	1.44279	1.39553	0.98878	1.32549	0.94981	177.35	1	252.139	100	4845	100.375	87.1438	161.565	0.9125	0.71657	0.90476
	Lysotracker	Proximal	Mock	FUS	FUS P1 Lyso Mock.tif Lyso.csv	1.73735	1.602	1.35307	1.66129	1.03701	176.213	0.93155	345.032	100	6630	80.3	87.3719	156.801	1.14063	0.62422	0.85246
	Lysotracker	Proximal	Mock	FUS	FUS P2 Lyso Mock.tif Lyso.csv	0.82252	1.63672	0.20816	0.65864	0.40241	165.128	0.69813	53.0819	100	1020	39.2375	21.2156	146.31	0.45625	0.61098	0.72727
	Lysotracker	Proximal	Mock	FUS	FUS P2 Lyso Mock.tif Lyso.csv	0.82252	1.55299	0.26021	0.71729	0.46188	18.435	1	66.3523	100	1275	19.6187	23.9531	33.6901	0.45625	0.64392	0.90909
	Lysotracker	Proximal	Mock	FUS	FUS P2 Lyso Mock.tif Lyso.csv	1.33019	1.08287	1.04082	1.19793	1.10626	63.435	1	265.409	100	5100	8.44063	27.375	120.964	1.14063	0.92347	0.88889
	Lysotracker	Proximal	Mock	FUS	FUS P2 Lyso Mock.tif Lyso.csv	0.94058	2.18816	0.26021	0.85144	0.38911	5.15242	0.76359	66.3523	100	1275	18.7063	27.8313	165.964	0.45625	0.45701	0.76923
	Lysotracker	Proximal	Mock	FUS	FUS P2 Lyso Mock.tif Lyso.csv	1.73735	1.28617	1.66531	1.6514	1.28396	3.91662	0.99117	424.655	100	8160	65.4719	28.0594	156.801	1.36875	0.7775	0.88889
	Lysotracker	Proximal	Mock	FUS	FUS P2 Lyso Mock.tif Lyso.csv	1.53031	1.45955	0.78062	1.20443	0.82521	21.849	0.61155	199.057	100	3825	32.85	29.4281	26.565	0.9125	0.68514	0.75
	Lysotracker	Proximal	Mock	FUS	FUS P2 Lyso Mock.tif Lyso.csv	1.53031	1.09158	1.40511	1.39745	1.28021	171.999	1	358.303	100	6885	111.097	28.7437	116.565	1.36875	0.9161	0.88525
	Lysotracker	Proximal	Mock	FUS	FUS P2 Lyso Mock.tif Lyso.csv	1.14063	1.2433	0.46837	0.86107	0.69257	162.652	0.79872	119.434	100	2295	59.0844	28.9719	143.13	0.68438	0.80431	0.81818
	Lysotracker	Proximal	Mock	FUS	FUS P2 Lyso Mock.tif Lyso.csv	0.82252	2.03127	0.20816	0.73374	0.36122	58.2825	0.85737	53.0819	100	1020	104.025	29.8844	56.3099	0.45625	0.4923	0.8
	Lysotracker	Proximal	Mock	FUS	FUS P2 Lyso Mock.tif Lyso.csv	1.02021	1.15777	0.46837	0.83092	0.71769	153.435	0.88357	119.434	100	2295	71.175	29.6562	153.435	0.80654	0.86373	0.75
	Lysotracker	Proximal	Mock	FUS	FUS P2 Lyso Mock.tif Lyso.csv	0.96785	1.22859	0.41633	0.80701	0.65686	45.0002	1	106.164	100	2040	97.1813	30.5688	45	0.68438	0.81394	0.94118
	Lysotracker	Proximal	Mock	FUS	FUS P2 Lyso Mock.tif Lyso.csv	1.02021	1.38959	0.46837	0.91032	0.6551	34.5728	0.88357	119.434	100	2295	101.744	31.025	26.565	0.80654	0.71964	0.75
	Lysotracker	Proximal	Mock	FUS	FUS P2 Lyso Mock.tif Lyso.csv	0.82252	1.5	0.31225	0.77223	0.51482	90	1	79.6228	100	1530	21.6719	30.7969	123.69	0.45625	0.66667	1
	Lysotracker	Proximal	Mock	FUS	FUS P2 Lyso Mock.tif Lyso.csv	1.02021	1.1852	0.46837	0.84071	0.70934	7.62756	1	119.434	100	2295	90.1094	31.4812	26.565	0.68438	0.84374	0.85714
	Lysotracker	Proximal	Mock	FUS	FUS P2 Lyso Mock.tif Lyso.csv	1.88117	1.07463	1.61327	1.48572	1.38255	175.569	0.81978	411.384	100	7905	46.0813	32.1656	165.964	1.58343	0.93056	0.775
	Lysotracker	Proximal	Mock	FUS	FUS P2 Lyso Mock.tif Lyso.csv	2.16418	1.25644	2.13368	1.84753	1.47045	122.703	0.68348	544.089	100	10455	70.4906	32.3937	108.435	1.71102	0.7959	0.74545
	Lysotracker	Proximal	Mock	FUS	FUS P2 Lyso Mock.tif Lyso.csv	0.82252	1.06885	0.36429	0.7041	0.65875	0	1	92.8932	100	1785	22.8125	32.6219	123.69	0.68438	0.93559	0.875
	Lysotracker	Proximal	Mock	FUS	FUS P2 Lyso Mock.tif Lyso.csv	1.64503	1.16501	1.40511	1.44369	1.23921	158.378	0.96737	358.303	100	6885	29.6562	33.3062	146.31	1.36875	0.85836	0.87097
	Lysotracker	Proximal	Mock	FUS	FUS P2 Lyso Mock.tif Lyso.csv	0.82252	2	0.20816	0.72807	0.36403	71.565	0.85737	53.0819	100	1020	116.344	33.5344	56.3099	0.45625	0.5	0.8
	Lysotracker	Proximal	Mock	FUS	FUS P2 Lyso Mock.tif Lyso.csv	1.73735	1.28286	1.50919	1.57006	1.22388	8.01121	0.95287	384.843	100	7395	40.6063	34.2188	23.1986	1.36875	0.77951	0.85294
	Lysotracker	Proximal	Mock	FUS	FUS P2 Lyso Mock.tif Lyso.csv	1.33019	1.43911	0.78062	1.19597	0.83105	170.101	0.97567	199.057	100	3825	32.3937	33.3062	149.036	0.9125	0.69487	0.85714
	Lysotracker	Proximal	Mock	FUS	FUS P2 Lyso Mock.tif Lyso.csv	0.82252	2.03127	0.20816	0.73374	0.36122	31.7175	1	53.0819	100	1020	83.2656	33.9906	33.6901	0.45625	0.4923	0.8
	Lysotracker	Proximal	Mock	FUS	FUS P2 Lyso Mock.tif Lyso.csv	1.02021	1.34027	0.46837	0.89402	0.66704	159.699	1	119.434	100	2295	86.0031	33.5344	153.435	0.68438	0.74612	0.85714
	Lysotracker	Proximal	Mock	FUS	FUS P2 Lyso Mock.tif Lyso.csv	1.88117	1.19919	1.7694	1.64366	1.37064	74.8666	0.91947	451.196	100	8670	99.6906	35.3594	75.9638	1.36875	0.8339	0.86076
	Lysotracker	Proximal	Mock	FUS	FUS P2 Lyso Mock.tif Lyso.csv	2.28125	1.79289	1.56123	1.88784	1.05296	25.0373	0.64681	398.114	100	7650	19.1625	37.8688	36.8699	1.2729	0.55776	0.8
	Lysotracker	Proximal	Mock	FUS	FUS P2 Lyso Mock.tif Lyso.csv	1.88117	1.16111	1.87348	1.66424	1.43332	44.2526	0.90283	477.737	100	9180	109.728	39.2375	14.0362	1.59688	0.86125	0.82759
	Lysotracker	Proximal	Mock	FUS	FUS P2 Lyso Mock.tif Lyso.csv	1.22849	1.71403	0.57245	1.11772	0.6521	164.745	0.97622	145.975	100	2805	61.3656	39.6938	158.199	0.68438	0.58342	0.84615
	Lysotracker	Proximal	Mock	FUS	FUS P2 Lyso Mock.tif Lyso.csv	1.88117	1.69091	1.24898	1.63981	0.96978	170.022	0.68581	318.491	100	6120	67.525	78.475	165.964	1.14063	0.5914	0.7619
	Lysotracker	Proximal	Mock	FUS	FUS P2 Lyso Mock.tif Lyso.csv	1.73735	1.60774	1.19694	1.56531	0.97361	8.58168	0.80311	305.221	100	5865	90.1094	81.6688	23.1986	1.14063	0.62199	0.7931
	Lysotracker	Proximal	Mock	FUS	FUS P2 Lyso Mock.tif Lyso.csv	2.15213	1.75925	1.56123	1.87005	1.06298	17.442	0.62157	398.114	100	7650	76.8781	82.5813	32.0054	1.32809	0.56842	0.73171
	Lysotracker	Proximal	Mock	FUS	FUS P2 Lyso Mock.tif Lyso.csv	1.46071	1.51917	0.78062	1.22879	0.80886	8.79174	0.52377	199.057	100	3825	9.35313	84.4063	38.6598	0.9125	0.65826	0.73171
	Lysotracker	Proximal	Mock	FUS	FUS P2 Lyso Mock.tif Lyso.csv	1.14063	1.14747	0.57245	0.91453	0.79699	39.6902	0.97622	145.975	100	2805	76.1938	85.3188	53.1301	0.9125	0.87148	0.81481
	Lysotracker	Proximal	Mock	FUS	FUS P2 Lyso Mock.tif Lyso.csv	3.8982	2.39215	4.21532	3.58315	1.49788	158.835	0.52717	1074.91	100	20655	80.0719	84.6344	159.444	1.83741	0.41803	0.79803
	Lysotracker	Proximal	Mock	FUS	FUS P2 Lyso Mock.tif Lyso.csv	0.64524	1.46385	0.15612	0.53943	0.3685	135	1	39.8114	100	765	24.4094	84.6344	135	0.45625	0.68313	0.85714
	Lysotracker	Proximal	Mock	FUS	FUS P2 Lyso Mock.tif Lyso.csv	2.55052	1.06256	3.74695	2.25149	2.11894	69.1704	0.84992	955.473	100	18360	109.5	85.3188	153.435	2.28125	0.94113	0.87805
	Lysotracker	Proximal	Mock	FUS	FUS P2 Lyso Mock.tif Lyso.csv	1.66078	1.50657	1.19694	1.51526	1.00577	165.168	0.87813	305.221	100	5865	13.2312	86.2313	164.055	1.12257	0.66376	0.83636
	Lysotracker	Proximal	Mock	FUS	FUS P2 Lyso Mock.tif Lyso.csv	1.33019	1.24725	0.78062	1.1134	0.89268	169.178	0.97567	199.057	100	3825	28.9719	87.3719	30.9638	0.9125	0.80176	0.85714
	Lysotracker	Proximal	Mock	FUS	FUS P2 Lyso Mock.tif Lyso.csv	0.64524	1.46385	0.15612	0.53943	0.3685	135	1	39.8114	100	765	86.0031	86.4594	135	0.45625	0.68313	0.85714
	Lysotracker	Proximal	Mock	FUS	FUS P2 Lyso Mock.tif Lyso.csv	0.82252	1.55299	0.26021	0.71729	0.46188	108.435	1	66.3523	100	1275	87.1438	86.4594	123.69	0.45625	0.64392	0.90909
	Lysotracker	Proximal	Mock	FUS	FUS P2 Lyso Mock.tif Lyso.csv	1.22849	2.38601	0.46837	1.19285	0.49993	4.73116	0.92273	119.434	100	2295	106.991	86.9156	21.8014	0.45625	0.41911	0.94737
	Lysotracker	Proximal	Mock	FUS	FUS P2 Lyso Mock.tif Lyso.csv	0.64524	1.46385	0.15612	0.53943	0.3685	45	1	39.8114	100	765	108.816	86.9156	45	0.45625	0.68313	0.85714
	Lysotracker	Proximal	Mock	FUS	FUS P2 Lyso Mock.tif Lyso.csv	1.02021	1.23565	0.52041	0.90485	0.73229	90	1	132.705	100	2550	53.3813	86.6875	116.565	0.68438	0.80929	0.90909
	Lysotracker	Proximal	Mock	FUS	FUS P2 Lyso Mock.tif Lyso.csv	1.02021	1.13876	0.57245	0.91105	0.80003	18.435	1	145.975	100	2805	70.2625	87.6	153.435	0.9125	0.87814	0.81481
	Lysotracker	Proximal	Mock	FUS	FUS P2 Lyso Mock.tif Lyso.csv	1.44279	1.52997	0.72857	1.19134	0.77866	80.8221	0.7502	185.786	100	3570	63.1906	88.9688	71.565	0.9125	0.65361	0.75676
	Lysotracker	Proximal	Mock	FUS	FUS P2 Lyso Mock.tif Lyso.csv	0.82252	1.29099	0.31225	0.71642	0.55493	135	1	79.6228	100	1530	2.96563	87.8281	123.69	0.64524	0.7746	0.8
	Lysotracker	Proximal	Mock	FUS	FUS P2 Lyso Mock.tif Lyso.csv	1.14063	1.93856	0.41633	1.01371	0.52292	35.355	1	106.164	100	2040	114.519	90.1094	36.8699	0.64524	0.51585	0.84211
	Lysotracker	Proximal	Mock	FUS	FUS P2 Lyso Mock.tif Lyso.csv	1.33019	1.21751	0.93674	1.20504	0.98976	0	1	238.868	100	4590	74.825	90.1094	149.036	0.9125	0.82135	0.94737
	Lysotracker	Proximal	Mock	FUS	FUS P2 Lyso Mock.tif Lyso.csv	1.66078	1.65009	1.04082	1.47875	0.89617	165.986	0.69836	265.409	100	5100	100.147	99.0063	164.055	1.10674	0.60603	0.72727
	Lysotracker	Proximal	Mock	FUS	FUS P3 Lyso Mock.tif Lyso.csv	1.73735	2.56211	0.62449	1.42731	0.55708	161.224	0.5389	159.246	100	3060	49.0469	21.2156	156.801	0.7616	0.3903	0.64865
	Lysotracker	Proximal	Mock	FUS	FUS P3 Lyso Mock.tif Lyso.csv	1.02021	1.34027	0.46837	0.89402	0.66704	20.3007	1	119.434	100	2295	38.0969	28.9719	26.565	0.68438	0.74612	0.85714
	Lysotracker	Proximal	Mock	FUS	FUS P3 Lyso Mock.tif Lyso.csv	1.29047	2.11295	0.46837	1.12252	0.53126	135	0.79872	119.434	100	2295	52.2406	28.2875	135	0.64524	0.47327	0.81818
	Lysotracker	Proximal	Mock	FUS	FUS P3 Lyso Mock.tif Lyso.csv	1.38763	2.9352	0.41633	1.24736	0.42497	0	0.58841	106.164	100	2040	57.7156	28.2875	170.538	0.45625	0.34069	0.8
	Lysotracker	Proximal	Mock	FUS	FUS P3 Lyso Mock.tif Lyso.csv	0.64524	1.46385	0.15612	0.53943	0.3685	45	1	39.8114	100	765	29.2	28.9719	45	0.45625	0.68313	0.85714
	Lysotracker	Proximal	Mock	FUS	FUS P3 Lyso Mock.tif Lyso.csv	1.02021	1.23565	0.52041	0.90485	0.73229	90	1	132.705	100	2550	43.8	28.5156	116.565	0.68438	0.80929	0.90909
	Lysotracker	Proximal	Mock	FUS	FUS P3 Lyso Mock.tif Lyso.csv	1.14063	1.37205	0.57245	1.00002	0.72885	15.0707	1	145.975	100	2805	80.9844	30.5688	36.8699	0.68438	0.72883	0.95652
	Lysotracker	Proximal	Mock	FUS	FUS P3 Lyso Mock.tif Lyso.csv	1.33019	1.26197	0.83266	1.15668	0.91657	116.001	1	212.327	100	4080	87.6	30.5688	120.964	0.9125	0.79241	0.88889
	Lysotracker	Proximal	Mock	FUS	FUS P3 Lyso Mock.tif Lyso.csv	2.15213	1.40297	2.18572	1.97596	1.40841	0	0.88034	557.359	100	10710	114.975	31.025	147.995	1.36875	0.71277	0.93333
	Lysotracker	Proximal	Mock	FUS	FUS P3 Lyso Mock.tif Lyso.csv	1.38763	1.20728	0.93674	1.19997	0.99394	157.072	0.93469	238.868	100	4590	106.078	32.85	170.538	1.12257	0.82831	0.8
	Lysotracker	Proximal	Mock	FUS	FUS P3 Lyso Mock.tif Lyso.csv	2.16418	1.08084	2.23776	1.75486	1.62361	152.921	0.63317	570.63	100	10965	56.1188	35.1313	161.565	1.7744	0.92521	0.78899
	Lysotracker	Proximal	Mock	FUS	FUS P3 Lyso Mock.tif Lyso.csv	0.82252	2	0.20816	0.72807	0.36403	18.435	0.85737	53.0819	100	1020	65.4719	35.5875	33.6901	0.45625	0.5	0.8
	Lysotracker	Proximal	Mock	FUS	FUS P3 Lyso Mock.tif Lyso.csv	1.14063	2.33949	0.36429	1.04169	0.44526	146.599	0.8976	92.8932	100	1785	109.956	79.1594	143.13	0.61247	0.42744	0.77778
	Lysotracker	Proximal	Mock	FUS	FUS P3 Lyso Mock.tif Lyso.csv	3.17741	1.23728	4.11124	2.54493	2.05687	17.1864	0.42332	1048.37	100	20145	13.9156	84.1781	21.0375	2.50938	0.80822	0.71818
	Lysotracker	Proximal	Mock	FUS	FUS P3 Lyso Mock.tif Lyso.csv	1.61309	1.10128	1.40511	1.40365	1.27456	69.2724	0.94279	358.303	100	6885	34.675	83.0375	98.1301	1.36875	0.90803	0.83077
	Lysotracker	Proximal	Mock	FUS	FUS P3 Lyso Mock.tif Lyso.csv	0.82252	1.55299	0.26021	0.71729	0.46188	108.435	1	66.3523	100	1275	42.4313	83.4938	123.69	0.45625	0.64392	0.90909
	Lysotracker	Proximal	Mock	FUS	FUS P3 Lyso Mock.tif Lyso.csv	1.96241	1.49686	1.56123	1.72496	1.15239	169.228	0.72981	398.114	100	7650	68.2094	83.95	144.462	1.36875	0.66807	0.83333
	Lysotracker	Proximal	Mock	FUS	FUS P3 Lyso Mock.tif Lyso.csv	3.04357	1.77643	3.799	2.93132	1.65012	176.112	0.75011	968.744	100	18615	91.25	84.8625	12.9946	1.59688	0.56293	0.89571
	Lysotracker	Proximal	Mock	FUS	FUS P3 Lyso Mock.tif Lyso.csv	1.46071	1.27325	0.98878	1.26608	0.99437	167.179	1	252.139	100	4845	57.9438	83.95	141.34	0.9125	0.78539	0.97436
	Lysotracker	Proximal	Mock	FUS	FUS P3 Lyso Mock.tif Lyso.csv	0.94058	1.52753	0.31225	0.77929	0.51016	0	0.76937	79.6228	100	1530	90.1094	84.6344	165.964	0.68438	0.65465	0.66667
	Lysotracker	Proximal	Mock	FUS	FUS P3 Lyso Mock.tif Lyso.csv	1.02021	1.3083	0.41633	0.83277	0.63653	55.278	0.91441	106.164	100	2040	100.603	85.5469	63.435	0.68438	0.76435	0.8
	Lysotracker	Proximal	Mock	FUS	FUS P3 Lyso Mock.tif Lyso.csv	1.14063	1.12163	0.57245	0.90417	0.80612	9.82691	0.71549	145.975	100	2805	103.341	86.6875	36.8699	0.9125	0.89156	0.78571
	Lysotracker	Proximal	Mock	FUS	FUS P3 Lyso Mock.tif Lyso.csv	1.78171	1.37103	1.45715	1.59489	1.16328	162.37	0.92001	371.573	100	7140	113.378	86.2313	129.806	1.2729	0.72938	0.82353
	Lysotracker	Proximal	Mock	FUS	FUS P3 Lyso Mock.tif Lyso.csv	1.14063	1.10507	0.62449	0.93737	0.84825	59.0893	0.78054	159.246	100	3060	111.553	86.6875	126.87	0.9125	0.90492	0.82759
	Lysotracker	Proximal	Mock	FUS	FUS P3 Lyso Mock.tif Lyso.csv	1.33019	1.12958	0.93674	1.16071	1.02756	115.406	1	238.868	100	4590	55.8906	87.6	120.964	1.12916	0.88529	0.85714
	Lysotracker	Proximal	Mock	FUS	FUS P3 Lyso Mock.tif Lyso.csv	0.64524	1	0.20816	0.51482	0.51482	0	1	53.0819	100	1020	87.6	87.6	135	0.45625	1	1
	Lysotracker	Proximal	Mock	FUS	FUS P3 Lyso Mock.tif Lyso.csv	0.72139	3	0.15612	0.77223	0.25741	90	0.80852	39.8114	100	765	116.572	87.6	108.435	0.22813	0.33333	1
	Lysotracker	Proximal	Mock	FUS	FUS P3 Lyso Mock.tif Lyso.csv	0.64524	1.46385	0.15612	0.53943	0.3685	45	1	39.8114	100	765	100.375	93.075	45	0.45625	0.68313	0.85714
	Lysotracker	Proximal	Mock	FUS	FUS P3 Lyso Mock.tif Lyso.csv	0.82252	2	0.20816	0.72807	0.36403	71.565	0.85737	53.0819	100	1020	32.85	93.5313	56.3099	0.45625	0.5	0.8
	Lysotracker	Proximal	Mock	FUS	FUS P3 Lyso Mock.tif Lyso.csv	1.73735	1.46156	0.83266	1.24479	0.85169	164.273	0.48386	212.327	100	4080	86.2313	93.5313	156.801	1.14063	0.6842	0.57143
	Lysotracker	Proximal	Mock	FUS	FUS P4 Lyso Mock.tif Lyso.csv	1.8392	1.8214	1.04082	1.55362	0.85298	147.694	0.61948	265.409	100	5100	88.2844	18.7063	150.255	1.12315	0.54903	0.68966
	Lysotracker	Proximal	Mock	FUS	FUS P4 Lyso Mock.tif Lyso.csv	1.02021	1.4	0.36429	0.80583	0.57559	78.6901	0.68722	92.8932	100	1785	82.125	22.8125	63.435	0.68438	0.71429	0.73684
	Lysotracker	Proximal	Mock	FUS	FUS P4 Lyso Mock.tif Lyso.csv	1.78171	1.02782	1.7694	1.52169	1.4805	161.565	0.91947	451.196	100	8670	3.87813	24.8656	129.806	1.58756	0.97293	0.83951
	Lysotracker	Proximal	Mock	FUS	FUS P4 Lyso Mock.tif Lyso.csv	1.14063	3.84988	0.20816	1.01014	0.26238	53.9094	0.4572	53.0819	100	1020	61.5938	27.375	53.1301	0.44426	0.25975	0.57143
	Lysotracker	Proximal	Mock	FUS	FUS P4 Lyso Mock.tif Lyso.csv	1.22849	1.20894	0.83266	1.13212	0.93645	0	1	212.327	100	4080	107.219	26.6906	158.199	0.9125	0.82717	0.88889
	Lysotracker	Proximal	Mock	FUS	FUS P4 Lyso Mock.tif Lyso.csv	1.02021	1.62369	0.41633	0.92774	0.57138	135	0.7854	106.164	100	2040	70.4906	27.1469	116.565	0.64524	0.61588	0.72727
	Lysotracker	Proximal	Mock	FUS	FUS P4 Lyso Mock.tif Lyso.csv	1.33019	1.16147	0.98878	1.20923	1.04112	135	1	252.139	100	4845	93.075	27.1469	120.964	1.12916	0.86098	0.88372
	Lysotracker	Proximal	Mock	FUS	FUS P4 Lyso Mock.tif Lyso.csv	0.64524	1.46385	0.15612	0.53943	0.3685	45	1	39.8114	100	765	114.519	27.8313	45	0.45625	0.68313	0.85714
	Lysotracker	Proximal	Mock	FUS	FUS P4 Lyso Mock.tif Lyso.csv	0.64524	1	0.20816	0.51482	0.51482	0	1	53.0819	100	1020	31.025	30.1125	135	0.45625	1	1
	Lysotracker	Proximal	Mock	FUS	FUS P4 Lyso Mock.tif Lyso.csv	0.82252	1.55299	0.26021	0.71729	0.46188	18.435	1	66.3523	100	1275	44.7125	31.2531	33.6901	0.45625	0.64392	0.90909
	Lysotracker	Proximal	Mock	FUS	FUS P4 Lyso Mock.tif Lyso.csv	0.82252	1.06885	0.36429	0.7041	0.65875	90	1	92.8932	100	1785	63.1906	31.025	123.69	0.68438	0.93559	0.875
	Lysotracker	Proximal	Mock	FUS	FUS P4 Lyso Mock.tif Lyso.csv	0.64524	1	0.20816	0.51482	0.51482	0	1	53.0819	100	1020	110.184	31.7094	135	0.45625	1	1
	Lysotracker	Proximal	Mock	FUS	FUS P4 Lyso Mock.tif Lyso.csv	1.14063	1.13493	0.62449	0.94995	0.83702	160.195	1	159.246	100	3060	96.4969	32.3937	143.13	0.9125	0.88111	0.85714
	Lysotracker	Proximal	Mock	FUS	FUS P4 Lyso Mock.tif Lyso.csv	1.96241	1.15886	2.0296	1.73051	1.49329	66.0315	0.82421	517.548	100	9945	48.5906	35.1313	54.4623	1.59688	0.86292	0.85714
	Lysotracker	Proximal	Mock	FUS	FUS P4 Lyso Mock.tif Lyso.csv	3.00052	1.49552	3.48675	2.57668	1.72294	110.489	0.60013	889.121	100	17085	12.0906	33.9906	98.7462	1.99273	0.66866	0.78363
	Lysotracker	Proximal	Mock	FUS	FUS P4 Lyso Mock.tif Lyso.csv	0.64524	1.46385	0.15612	0.53943	0.3685	135	1	39.8114	100	765	41.975	36.2719	135	0.45625	0.68313	0.85714
	Lysotracker	Proximal	Mock	FUS	FUS P4 Lyso Mock.tif Lyso.csv	1.88117	1.40772	1.66531	1.72767	1.22729	6.81438	0.91441	424.655	100	8160	87.3719	82.5813	165.964	1.36875	0.71037	0.86486
	Lysotracker	Proximal	Mock	FUS	FUS P4 Lyso Mock.tif Lyso.csv	3.48964	1.05996	5.41227	2.70264	2.54977	8.86374	0.60372	1380.13	100	26520	86.2313	85.0906	168.69	2.88145	0.94344	0.74552
	Lysotracker	Proximal	Mock	FUS	FUS P4 Lyso Mock.tif Lyso.csv	2.60103	1.05688	4.11124	2.35209	2.22551	26.5057	0.88694	1048.37	100	20145	1.14063	85.5469	164.745	2.28125	0.94618	0.88268
	Lysotracker	Proximal	Mock	FUS	FUS P4 Lyso Mock.tif Lyso.csv	1.8392	1.06564	1.61327	1.4795	1.38836	170.242	0.72294	411.384	100	7905	36.0438	84.8625	97.125	1.45178	0.9384	0.76543
	Lysotracker	Proximal	Mock	FUS	FUS P4 Lyso Mock.tif Lyso.csv	2.74699	1.39281	2.86226	2.25297	1.61757	46.0277	0.70941	729.875	100	14025	45.8531	87.3719	41.6335	1.93571	0.71797	0.7971
	Lysotracker	Proximal	Mock	FUS	FUS P4 Lyso Mock.tif Lyso.csv	0.82252	1.55299	0.26021	0.71729	0.46188	161.565	1	66.3523	100	1275	32.3937	85.775	146.31	0.45625	0.64392	0.90909
	Lysotracker	Proximal	Mock	FUS	FUS P4 Lyso Mock.tif Lyso.csv	0.82252	1.06885	0.36429	0.7041	0.65875	0	1	92.8932	100	1785	90.7938	85.775	123.69	0.68438	0.93559	0.875
	Lysotracker	Proximal	Mock	FUS	FUS P4 Lyso Mock.tif Lyso.csv	1.22849	1.04446	0.8847	1.08467	1.0385	90	1	225.598	100	4335	6.3875	86.4594	111.801	1.12916	0.95744	0.85
	Lysotracker	Proximal	Mock	FUS	FUS P5 Lyso Mock.tif Lyso.csv	0.94058	2.18816	0.26021	0.85144	0.38911	174.848	0.76359	66.3523	100	1275	66.1563	25.0938	165.964	0.45625	0.45701	0.76923
	Lysotracker	Proximal	Mock	FUS	FUS P5 Lyso Mock.tif Lyso.csv	0.82252	1.55299	0.26021	0.71729	0.46188	18.435	1	66.3523	100	1275	46.9938	30.7969	33.6901	0.45625	0.64392	0.90909
	Lysotracker	Proximal	Mock	FUS	FUS P5 Lyso Mock.tif Lyso.csv	1.38763	1.29841	0.78062	1.13601	0.87492	81.1143	0.7234	199.057	100	3825	9.125	30.5688	99.4623	1.07706	0.77017	0.73171
	Lysotracker	Proximal	Mock	FUS	FUS P5 Lyso Mock.tif Lyso.csv	1.44279	1.96069	0.46837	1.08132	0.5515	16.0856	0.46734	119.434	100	2295	74.5969	31.7094	18.435	0.80708	0.51002	0.6
	Lysotracker	Proximal	Mock	FUS	FUS P5 Lyso Mock.tif Lyso.csv	0.82252	2.70203	0.15612	0.73288	0.27123	151.845	0.75398	39.8114	100	765	75.0531	31.7094	146.31	0.40831	0.37009	0.66667
	Lysotracker	Proximal	Mock	FUS	FUS P5 Lyso Mock.tif Lyso.csv	1.02021	1.6053	0.41633	0.92247	0.57464	160.67	1	106.164	100	2040	99.4625	31.9375	153.435	0.68438	0.62294	0.8
	Lysotracker	Proximal	Mock	FUS	FUS P5 Lyso Mock.tif Lyso.csv	0.82252	1.5	0.31225	0.77223	0.51482	0	1	79.6228	100	1530	105.622	31.7094	146.31	0.45625	0.66667	1
	Lysotracker	Proximal	Mock	FUS	FUS P5 Lyso Mock.tif Lyso.csv	2.16418	2.06485	1.7694	2.15681	1.04454	4.4717	0.76997	451.196	100	8670	80.5281	32.3937	161.565	1.14063	0.4843	0.83951
	Lysotracker	Proximal	Mock	FUS	FUS P5 Lyso Mock.tif Lyso.csv	0.96785	1.22859	0.41633	0.80701	0.65686	135	1	106.164	100	2040	90.5656	32.1656	135	0.68438	0.81394	0.94118
	Lysotracker	Proximal	Mock	FUS	FUS P5 Lyso Mock.tif Lyso.csv	0.64524	1.46385	0.15612	0.53943	0.3685	45	1	39.8114	100	765	68.6656	32.85	45	0.45625	0.68313	0.85714
	Lysotracker	Proximal	Mock	FUS	FUS P5 Lyso Mock.tif Lyso.csv	0.82252	1.5	0.31225	0.77223	0.51482	0	1	79.6228	100	1530	85.3188	32.6219	146.31	0.45625	0.66667	1
	Lysotracker	Proximal	Mock	FUS	FUS P5 Lyso Mock.tif Lyso.csv	1.02021	1	0.62449	0.8917	0.8917	0	1	159.246	100	3060	77.5625	32.85	116.565	0.9125	1	0.85714
	Lysotracker	Proximal	Mock	FUS	FUS P5 Lyso Mock.tif Lyso.csv	1.33019	1.43404	0.72857	1.15338	0.80429	162.195	0.7502	185.786	100	3570	94.6719	32.85	149.036	0.9125	0.69733	0.8
	Lysotracker	Proximal	Mock	FUS	FUS P5 Lyso Mock.tif Lyso.csv	1.02021	1.32727	0.52041	0.9378	0.70656	2.596e-14	1	132.705	100	2550	97.4094	32.85	153.435	0.68438	0.75342	0.90909
	Lysotracker	Proximal	Mock	FUS	FUS P5 Lyso Mock.tif Lyso.csv	0.64524	1	0.20816	0.51482	0.51482	0	1	53.0819	100	1020	9.58125	33.0781	135	0.45625	1	1
	Lysotracker	Proximal	Mock	FUS	FUS P5 Lyso Mock.tif Lyso.csv	2.82175	2.75864	1.92552	2.60062	0.94272	5.83012	0.43034	491.007	100	9435	54.5219	34.2188	14.0362	1.22843	0.3625	0.65487
	Lysotracker	Proximal	Mock	FUS	FUS P5 Lyso Mock.tif Lyso.csv	1.33019	1.72743	0.52041	1.06986	0.61934	18.9771	0.70894	132.705	100	2550	85.0906	33.9906	30.9638	0.68438	0.57889	0.74074
	Lysotracker	Proximal	Mock	FUS	FUS P5 Lyso Mock.tif Lyso.csv	1.93571	1.75302	1.30103	1.70409	0.97209	51.8818	0.7312	331.762	100	6375	92.8469	34.675	45	1.20297	0.57044	0.83333
	Lysotracker	Proximal	Mock	FUS	FUS P5 Lyso Mock.tif Lyso.csv	1.46071	2.17521	0.62449	1.31513	0.6046	117.021	0.6952	159.246	100	3060	111.553	33.3062	128.66	0.79378	0.45972	0.75
	Lysotracker	Proximal	Mock	FUS	FUS P5 Lyso Mock.tif Lyso.csv	1.02021	1.34281	0.46837	0.89486	0.66641	78.0188	0.92273	119.434	100	2295	46.5375	33.5344	116.565	0.68438	0.74471	0.85714
	Lysotracker	Proximal	Mock	FUS	FUS P5 Lyso Mock.tif Lyso.csv	1.02021	1.34027	0.46837	0.89402	0.66704	20.3007	1	119.434	100	2295	98.7781	35.1313	26.565	0.68438	0.74612	0.85714
	Lysotracker	Proximal	Mock	FUS	FUS P5 Lyso Mock.tif Lyso.csv	0.64524	1.46385	0.15612	0.53943	0.3685	135	1	39.8114	100	765	57.0313	34.9031	135	0.45625	0.68313	0.85714
	Lysotracker	Proximal	Mock	FUS	FUS P5 Lyso Mock.tif Lyso.csv	0.82252	1.5	0.31225	0.77223	0.51482	90	1	79.6228	100	1530	47.45	35.1313	123.69	0.45625	0.66667	1
	Lysotracker	Proximal	Mock	FUS	FUS P5 Lyso Mock.tif Lyso.csv	1.33019	1.12021	0.8847	1.12332	1.00277	61.5119	1	225.598	100	4335	78.2469	36.0438	30.9638	1.12257	0.89269	0.82927
	Lysotracker	Proximal	Mock	FUS	FUS P5 Lyso Mock.tif Lyso.csv	0.96785	1.72674	0.26021	0.75636	0.43803	45.0001	0.76359	66.3523	100	1275	5.01875	36.0438	45	0.64524	0.57912	0.71429
	Lysotracker	Proximal	Mock	FUS	FUS P5 Lyso Mock.tif Lyso.csv	0.82252	1.29099	0.31225	0.71642	0.55493	135	1	79.6228	100	1530	45.1688	35.3594	123.69	0.64524	0.7746	0.8
	Lysotracker	Proximal	Mock	FUS	FUS P5 Lyso Mock.tif Lyso.csv	1.14063	2.27524	0.31225	0.95108	0.41801	44.4033	0.58905	79.6228	100	1530	32.85	42.6594	36.8699	0.63338	0.43951	0.6
	Lysotracker	Proximal	Mock	FUS	FUS P5 Lyso Mock.tif Lyso.csv	1.02021	1.34027	0.46837	0.89402	0.66704	20.3007	1	119.434	100	2295	5.70313	86.4594	26.565	0.68438	0.74612	0.85714
	Lysotracker	Proximal	Mock	FUS	FUS P5 Lyso Mock.tif Lyso.csv	1.46071	1.04103	1.19694	1.25957	1.20993	87.2139	0.93771	305.221	100	5865	82.5813	87.8281	51.3402	1.29047	0.96059	0.82143
	Lysotracker	Proximal	Mock	FUS	FUS P5 Lyso Mock.tif Lyso.csv	1.14063	1.70872	0.46837	1.00945	0.59076	33.4007	0.88357	119.434	100	2295	32.6219	87.8281	36.8699	0.71484	0.58523	0.75
	Lysotracker	Proximal	Mock	FUS	FUS P5 Lyso Mock.tif Lyso.csv	1.9491	1.37665	1.61327	1.68159	1.22151	1.29651	0.88583	411.384	100	7905	85.0906	87.8281	20.556	1.36875	0.7264	0.81579
	Lysotracker	Proximal	Mock	FUS	FUS P5 Lyso Mock.tif Lyso.csv	2.88558	1.05136	3.85104	2.27049	2.15957	177.42	0.70633	982.014	100	18870	4.10625	88.7406	18.435	2.28125	0.95115	0.80874
	Lysotracker	Proximal	Mock	FUS	FUS P5 Lyso Mock.tif Lyso.csv	0.64524	1.46385	0.15612	0.53943	0.3685	135	1	39.8114	100	765	97.8656	87.3719	135	0.45625	0.68313	0.85714
	Lysotracker	Proximal	Mock	FUS	FUS P5 Lyso Mock.tif Lyso.csv	1.22849	1.12747	0.78062	1.05859	0.9389	14.0362	1	199.057	100	3825	99.9188	88.0563	21.8014	0.9125	0.88694	0.85714
	Lysotracker	Proximal	Mock	FUS	FUS P5 Lyso Mock.tif Lyso.csv	0.82252	1.55299	0.26021	0.71729	0.46188	161.565	1	66.3523	100	1275	50.8719	87.6	146.31	0.45625	0.64392	0.90909
	Lysotracker	Proximal	Mock	FUS	FUS P5 Lyso Mock.tif Lyso.csv	1.02021	1.58402	0.31225	0.79357	0.50098	24.1832	0.68581	79.6228	100	1530	54.0656	88.9688	26.565	0.64983	0.6313	0.66667
	Lysotracker	Proximal	Mock	FUS	FUS P5 Lyso Mock.tif Lyso.csv	1.02021	1.13876	0.57245	0.91105	0.80003	18.435	1	145.975	100	2805	52.4688	88.9688	153.435	0.9125	0.87814	0.81481
	Lysotracker	Proximal	Mock	FUS	FUS P5 Lyso Mock.tif Lyso.csv	0.64524	1.46385	0.15612	0.53943	0.3685	135	1	39.8114	100	765	88.9688	88.9688	135	0.45625	0.68313	0.85714
	Lysotracker	Proximal	Mock	FUS	FUS P5 Lyso Mock.tif Lyso.csv	1.02021	1.23565	0.52041	0.90485	0.73229	90	1	132.705	100	2550	111.097	89.8813	116.565	0.68438	0.80929	0.90909
	Lysotracker	Proximal	Mock	FUS	FUS P5 Lyso Mock.tif Lyso.csv	1.33019	1.09423	0.93674	1.1424	1.04402	147.995	1	238.868	100	4590	54.2938	90.5656	149.036	1.12916	0.91388	0.85714
	Lysotracker	Proximal	Mock	FUS	FUS P5 Lyso Mock.tif Lyso.csv	0.72139	1.4676	0.20816	0.62368	0.42497	0	1	53.0819	100	1020	57.4875	91.25	161.565	0.45625	0.68139	0.8
	Lysotracker	Proximal	Mock	FUS	FUS P5 Lyso Mock.tif Lyso.csv	1.02021	1.93571	0.36429	0.94754	0.48951	171.65	0.94327	92.8932	100	1785	93.9875	91.4781	153.435	0.45625	0.51661	0.93333
	Lysotracker	Proximal	Mock	FUS	FUS P5 Lyso Mock.tif Lyso.csv	0.64524	1.46385	0.15612	0.53943	0.3685	45	1	39.8114	100	765	106.991	99.4625	45	0.45625	0.68313	0.85714
	Lysotracker	Proximal	Mock	TDP43	TDP43 P1 Lyso.tif Lyso.csv	1.02021	2.16507	0.26021	0.84693	0.39118	32.6124	0.64114	66.3523	100	1275	111.097	29.2	26.565	0.61247	0.46188	0.58824
	Lysotracker	Proximal	Mock	TDP43	TDP43 P1 Lyso.tif Lyso.csv	3.87813	2.59261	3.85104	3.56543	1.37523	107.523	0.46903	982.014	100	18870	108.816	28.9719	118.072	1.86492	0.38571	0.71498
	Lysotracker	Proximal	Mock	TDP43	TDP43 P1 Lyso.tif Lyso.csv	1.66078	1.39896	1.09286	1.39521	0.99732	1.39409	0.63506	278.68	100	5355	112.922	29.6562	164.055	1.14063	0.71482	0.73684
	Lysotracker	Proximal	Mock	TDP43	TDP43 P1 Lyso.tif Lyso.csv	1.14063	1.61373	0.31225	0.80098	0.49635	48.7973	0.42537	79.6228	100	1530	11.6344	30.5688	53.1301	0.68438	0.61968	0.6
	Lysotracker	Proximal	Mock	TDP43	TDP43 P1 Lyso.tif Lyso.csv	1.73735	1.19318	1.50919	1.51419	1.26904	16.5917	0.82868	384.843	100	7395	57.2594	29.8844	156.801	1.36875	0.8381	0.84058
	Lysotracker	Proximal	Mock	TDP43	TDP43 P1 Lyso.tif Lyso.csv	2.92143	1.4367	3.27858	2.44896	1.70457	78.1513	0.52399	836.039	100	16065	85.775	32.1656	51.3402	2.0999	0.69604	0.76364
	Lysotracker	Proximal	Mock	TDP43	TDP43 P1 Lyso.tif Lyso.csv	1.16321	1.0713	0.52041	0.84253	0.78645	0	0.57933	132.705	100	2550	45.1688	30.7969	168.69	0.9125	0.93344	0.68966
	Lysotracker	Proximal	Mock	TDP43	TDP43 P1 Lyso.tif Lyso.csv	1.61309	1.43709	0.98878	1.34508	0.93597	122.54	0.66344	252.139	100	4845	102.428	30.3406	135	1.12315	0.69585	0.7037
	Lysotracker	Proximal	Mock	TDP43	TDP43 P1 Lyso.tif Lyso.csv	1.14063	1.14806	0.67653	0.99445	0.8662	13.7764	1	172.516	100	3315	104.938	30.5688	143.13	0.9125	0.87104	0.89655
	Lysotracker	Proximal	Mock	TDP43	TDP43 P1 Lyso.tif Lyso.csv	0.82252	1.55299	0.26021	0.71729	0.46188	18.435	1	66.3523	100	1275	68.6656	31.025	33.6901	0.45625	0.64392	0.90909
	Lysotracker	Proximal	Mock	TDP43	TDP43 P1 Lyso.tif Lyso.csv	1.14063	1.28206	0.36429	0.77114	0.60148	49.065	0.40553	92.8932	100	1785	72.0875	31.4812	36.8699	0.88683	0.77999	0.56
	Lysotracker	Proximal	Mock	TDP43	TDP43 P1 Lyso.tif Lyso.csv	1.14063	1.28124	0.62449	1.00933	0.78778	32.0668	1	159.246	100	3060	96.4969	31.2531	36.8699	0.9125	0.78049	0.85714
	Lysotracker	Proximal	Mock	TDP43	TDP43 P1 Lyso.tif Lyso.csv	1.33019	1.41605	0.78062	1.18635	0.83779	29.9908	0.94248	199.057	100	3825	15.7406	32.3937	30.9638	0.96785	0.70619	0.78947
	Lysotracker	Proximal	Mock	TDP43	TDP43 P1 Lyso.tif Lyso.csv	1.53031	1.18958	1.19694	1.34644	1.13187	0	0.87813	305.221	100	5865	94.2156	31.9375	153.435	1.14063	0.84063	0.85185
	Lysotracker	Proximal	Mock	TDP43	TDP43 P1 Lyso.tif Lyso.csv	0.82252	1.29099	0.31225	0.71642	0.55493	45	1	79.6228	100	1530	10.7219	33.3062	33.6901	0.64524	0.7746	0.8
	Lysotracker	Proximal	Mock	TDP43	TDP43 P1 Lyso.tif Lyso.csv	0.82252	2	0.20816	0.72807	0.36403	161.565	0.85737	53.0819	100	1020	36.9563	33.3062	146.31	0.45625	0.5	0.8
	Lysotracker	Proximal	Mock	TDP43	TDP43 P1 Lyso.tif Lyso.csv	0.82252	1.63672	0.20816	0.65864	0.40241	75.1276	0.69813	53.0819	100	1020	95.1281	84.8625	56.3099	0.45625	0.61098	0.72727
	Lysotracker	Proximal	Mock	TDP43	TDP43 P1 Lyso.tif Lyso.csv	1.16321	1.91072	0.36429	0.9414	0.49269	167.492	0.49626	92.8932	100	1785	96.2688	84.6344	168.69	0.68438	0.52336	0.6087
	Lysotracker	Proximal	Mock	TDP43	TDP43 P1 Lyso.tif Lyso.csv	1.73735	1.47444	1.09286	1.43236	0.97146	170.38	0.48973	278.68	100	5355	61.3656	84.6344	156.801	1.32673	0.67822	0.66667
	Lysotracker	Proximal	Mock	TDP43	TDP43 P1 Lyso.tif Lyso.csv	1.14063	1.55944	0.52041	1.01651	0.65184	18.2222	1	132.705	100	2550	81.4406	85.0906	36.8699	0.68438	0.64126	0.90909
	Lysotracker	Proximal	Mock	TDP43	TDP43 P1 Lyso.tif Lyso.csv	1.73735	1.07833	1.66531	1.51209	1.40226	98.6729	0.84623	424.655	100	8160	46.9938	84.6344	113.199	1.59688	0.92736	0.83117
	Lysotracker	Proximal	Mock	TDP43	TDP43 P1 Lyso.tif Lyso.csv	1.29047	1.31898	0.72857	1.10614	0.83863	45.0002	1	185.786	100	3570	23.2688	86.4594	45	0.9125	0.75816	0.93333
	Lysotracker	Proximal	Mock	TDP43	TDP43 P1 Lyso.tif Lyso.csv	0.82252	2.70203	0.15612	0.73288	0.27123	28.155	0.75398	39.8114	100	765	42.4313	86.2313	33.6901	0.40831	0.37009	0.66667
	Lysotracker	Proximal	Mock	TDP43	TDP43 P1 Lyso.tif Lyso.csv	1.14063	1.21815	0.62449	0.98417	0.80792	34.722	0.96737	159.246	100	3060	7.75625	86.9156	36.8699	0.9125	0.82091	0.88889
	Lysotracker	Proximal	Mock	TDP43	TDP43 P1 Lyso.tif Lyso.csv	1.33019	1.42387	0.67653	1.10748	0.77779	1.44929	0.67505	172.516	100	3315	36.2719	87.8281	30.9638	0.9125	0.70231	0.74286
	Lysotracker	Proximal	Mock	TDP43	TDP43 P1 Lyso.tif Lyso.csv	2.10321	1.12787	2.49797	1.894	1.67926	20.2403	0.98645	636.982	100	12240	42.4313	88.7406	40.6013	1.59688	0.88662	0.93204
	Lysotracker	Proximal	Mock	TDP43	TDP43 P1 Lyso.tif Lyso.csv	1.02021	1.32727	0.52041	0.9378	0.70656	90	1	132.705	100	2550	2.7375	89.6531	116.565	0.68438	0.75342	0.90909
	Lysotracker	Proximal	Mock	TDP43	TDP43 P1 Lyso.tif Lyso.csv	1.8392	1.17533	1.82144	1.65098	1.4047	8.62573	1	464.466	100	8925	57.7156	90.7938	29.7449	1.36875	0.85083	0.92105
	Lysotracker	Proximal	Mock	TDP43	TDP43 P1 Lyso.tif Lyso.csv	1.46071	1.24393	0.98878	1.25142	1.00602	57.4671	1	252.139	100	4845	59.9969	90.7938	51.3402	1.12916	0.80391	0.88372
	Lysotracker	Proximal	Mock	TDP43	TDP43 P1 Lyso.tif Lyso.csv	2.10321	1.24023	2.18572	1.85782	1.49797	10.5388	0.83024	557.359	100	10710	38.7813	90.3375	167.471	1.59688	0.8063	0.84848
	Lysotracker	Proximal	Mock	TDP43	TDP43 P1 Lyso.tif Lyso.csv	1.22849	1.16363	0.72857	1.03896	0.89286	171.918	0.99252	185.786	100	3570	45.3969	90.5656	21.8014	0.9125	0.85938	0.82353
	Lysotracker	Proximal	Mock	TDP43	TDP43 P2 Lyso.tif Lyso.csv	0.82252	2	0.20816	0.72807	0.36403	18.435	0.85737	53.0819	100	1020	86.0031	24.6375	33.6901	0.45625	0.5	0.8
	Lysotracker	Proximal	Mock	TDP43	TDP43 P2 Lyso.tif Lyso.csv	0.82252	2.03127	0.20816	0.73374	0.36122	121.717	0.85737	53.0819	100	1020	88.2844	24.1812	123.69	0.45625	0.4923	0.8
	Lysotracker	Proximal	Mock	TDP43	TDP43 P2 Lyso.tif Lyso.csv	0.96785	1.44874	0.31225	0.75892	0.52385	24.6993	0.68581	79.6228	100	1530	57.4875	25.55	45	0.68438	0.69026	0.75
	Lysotracker	Proximal	Mock	TDP43	TDP43 P2 Lyso.tif Lyso.csv	2.88558	2.84131	1.87348	2.60339	0.91626	160.625	0.4101	477.737	100	9180	75.7375	25.0938	161.565	1.29966	0.35195	0.63158
	Lysotracker	Proximal	Mock	TDP43	TDP43 P2 Lyso.tif Lyso.csv	3.10284	2.24655	3.43471	3.13443	1.39522	10.1059	0.70149	875.851	100	16830	80.3	26.2344	17.1027	1.54944	0.44513	0.86842
	Lysotracker	Proximal	Mock	TDP43	TDP43 P2 Lyso.tif Lyso.csv	1.44279	1.41649	0.93674	1.29978	0.91761	167.764	1	238.868	100	4590	67.2969	25.3219	161.565	0.9125	0.70597	0.87805
	Lysotracker	Proximal	Mock	TDP43	TDP43 P2 Lyso.tif Lyso.csv	1.9491	2.71506	0.98878	1.84882	0.68095	4.77539	0.50245	252.139	100	4845	70.7188	26.0063	20.556	0.9125	0.36832	0.67857
	Lysotracker	Proximal	Mock	TDP43	TDP43 P2 Lyso.tif Lyso.csv	2.16418	1.03124	2.70613	1.88499	1.82789	41.4275	0.93866	690.064	100	13260	2.7375	26.9187	18.435	1.825	0.96971	0.88889
	Lysotracker	Proximal	Mock	TDP43	TDP43 P2 Lyso.tif Lyso.csv	1.02021	1.1852	0.46837	0.84071	0.70934	7.62756	1	119.434	100	2295	68.8938	26.0063	26.565	0.68438	0.84374	0.85714
	Lysotracker	Proximal	Mock	TDP43	TDP43 P2 Lyso.tif Lyso.csv	1.46071	1.07769	0.78062	1.03495	0.96034	80.7825	0.67362	199.057	100	3825	84.4063	26.6906	51.3402	1.10674	0.92791	0.71429
	Lysotracker	Proximal	Mock	TDP43	TDP43 P2 Lyso.tif Lyso.csv	1.66078	1.35348	1.24898	1.4671	1.08395	7.36149	0.91631	318.491	100	6120	30.3406	26.4625	15.9454	1.14063	0.73884	0.85714
	Lysotracker	Proximal	Mock	TDP43	TDP43 P2 Lyso.tif Lyso.csv	2.60103	2.08177	2.18572	2.40696	1.15621	0.7831	0.75815	557.359	100	10710	32.1656	26.6906	15.2551	1.14063	0.48036	0.86598
	Lysotracker	Proximal	Mock	TDP43	TDP43 P2 Lyso.tif Lyso.csv	0.72139	1.4676	0.20816	0.62368	0.42497	90	0.85737	53.0819	100	1020	59.7688	26.4625	108.435	0.45625	0.68139	0.8
	Lysotracker	Proximal	Mock	TDP43	TDP43 P2 Lyso.tif Lyso.csv	1.61309	1.41395	0.83266	1.22435	0.86591	133.374	0.79536	212.327	100	4080	37.6406	26.6906	135	1.05156	0.70724	0.8
	Lysotracker	Proximal	Mock	TDP43	TDP43 P2 Lyso.tif Lyso.csv	2.04041	1.33377	2.08164	1.88018	1.40967	74.2678	0.97308	530.819	100	10200	14.1438	28.7437	63.435	1.36875	0.74975	0.91954
	Lysotracker	Proximal	Mock	TDP43	TDP43 P2 Lyso.tif Lyso.csv	1.64503	1.18243	1.50919	1.50735	1.27479	40.1844	1	384.843	100	7395	19.6187	28.5156	33.6901	1.36875	0.84571	0.90625
	Lysotracker	Proximal	Mock	TDP43	TDP43 P2 Lyso.tif Lyso.csv	2.16418	1.64288	2.13368	2.11263	1.28593	175.999	0.86648	544.089	100	10455	42.8875	27.6031	161.565	1.36875	0.60869	0.85417
	Lysotracker	Proximal	Mock	TDP43	TDP43 P2 Lyso.tif Lyso.csv	2.55052	1.80317	1.92552	2.10255	1.16603	11.6534	0.53588	491.007	100	9435	103.797	29.6562	26.565	1.36875	0.55458	0.72549
	Lysotracker	Proximal	Mock	TDP43	TDP43 P2 Lyso.tif Lyso.csv	1.29047	1.97558	0.52041	1.14413	0.57914	54.5626	0.88747	132.705	100	2550	32.3937	29.6562	45	0.71484	0.50618	0.8
	Lysotracker	Proximal	Mock	TDP43	TDP43 P2 Lyso.tif Lyso.csv	1.53031	1.1468	1.30103	1.3783	1.20186	10.8704	1	331.762	100	6375	68.2094	29.6562	26.565	1.14063	0.87199	0.90909
	Lysotracker	Proximal	Mock	TDP43	TDP43 P2 Lyso.tif Lyso.csv	1.46071	1.35837	0.93674	1.27284	0.93703	57.6996	0.96454	238.868	100	4590	115.888	29.8844	51.3402	1.12257	0.73618	0.85714
	Lysotracker	Proximal	Mock	TDP43	TDP43 P2 Lyso.tif Lyso.csv	2.29263	1.25485	2.49797	1.99776	1.59204	11.155	0.85073	636.982	100	12240	64.3313	29.4281	174.289	1.825	0.79691	0.83478
[truncated: 19,753 more rows]
